# Supplementary material for: Engineering controllable alteration of malonyl-CoA levels to enhance polyketide production and versatility in E. coli
Source: Research Square preprint supplement (doi:10.21203/rs.3.rs-4165928/v1), 2024-04-05
Supplement: Supplementary file 1 [file 068e5f5957d26089c3474e17.xlsx]

## Sheet: MatBC+mal vs MatBC+bio_Full
Protein	Protein.Group	Protein.Names	Protein.Description	log2_mean_bioHMatBC_20mmMal	log2_mean_bioHMatBC_biotin	log2_std_bioHMatBC_20mmMal	log2_std_bioHMatBC_biotin	t-test_stat	p-value	p_adjusted(BH)	log2_Fold_change_A/B
Aas	P31119	AAS_ECOLI	Bifunctional protein Aas	20.4209	20.2791	0.629581	0.405668	0.32793	0.762053	0.8465	0.1418	0.118015
Acca	P0ABD5	ACCA_ECOLI	Acetyl-coenzyme A carboxylase carboxyl transferase subunit alpha	24.4691	24.1299	0.0514433	0.0539994	7.87843	0.00141692	0.0295255	0.339241	2.84865
Accb	P0ABD8	BCCP_ECOLI	Biotin carboxyl carrier protein of acetyl-CoA carboxylase	22.3151	21.5245	0.31596	0.213851	3.58955	0.0285395	0.134532	0.790687	1.54455
Accc	P24182	ACCC_ECOLI	Biotin carboxylase	23.8322	23.4295	0.160484	0.0396508	4.21912	0.0422742	0.165516	0.402678	1.37392
Accd	P0A9Q5	ACCD_ECOLI	Acetyl-coenzyme A carboxylase carboxyl transferase subunit beta	23.8509	23.3529	0.117881	0.284253	2.80298	0.0774271	0.23859	0.497993	1.11111
Acea	P0A9G6	ACEA_ECOLI	Isocitrate lyase	22.842	21.5394	0.112624	0.392445	5.5259	0.0220593	0.116428	1.30259	1.65641
Acee	P0AFG8	ODP1_ECOLI	Pyruvate dehydrogenase E1 component	26.7158	27.7169	0.0908428	0.173775	-8.84291	0.00298094	0.043133	-1.00111	2.52565
Acef	P06959	ODP2_ECOLI	Dihydrolipoyllysine-residue acetyltransferase component of pyruvate dehydrogenase complex	25.6786	26.4072	0.0371616	0.257599	-4.84913	0.0368651	0.157234	-0.72865	1.43338
Acka	P0A6A3	ACKA_ECOLI	Acetate kinase	24.0203	24.3183	0.0883558	0.136186	-3.17906	0.0416186	0.164889	-0.297958	1.38071
Acna	P25516	ACON1_ECOLI	Aconitate hydratase 1	23.3015	22.9031	0.165931	0.200615	2.65016	0.0590487	0.202175	0.398346	1.22879
Acnb	P36683	ACON2_ECOLI	Aconitate hydratase 2	26.8822	22.8361	0.0510502	0.0741516	77.8449	7.27411e-07	0.000242083	4.04608	6.13822
Acpp	P0A6A8	ACP_ECOLI	Acyl carrier protein	24.2545	24.589	0.444003	0.398187	-0.971489	0.386919	0.589591	-0.334514	0.41238
Acps	P24224	ACPS_ECOLI	Holo-[acyl-carrier-protein] synthase	14.3092	15.439	2.36128	2.02222	-0.629423	0.563993	0.713676	-1.12975	0.248726
Acra	P0AE06	ACRA_ECOLI	Multidrug efflux pump subunit AcrA	24.1501	24.3253	0.00854123	0.376145	-0.806292	0.504633	0.677732	-0.175145	0.297024
Acrb	P31224	ACRB_ECOLI	Multidrug efflux pump subunit AcrB	23.0178	23.5346	0.0433926	0.1742	-4.98614	0.029773	0.139164	-0.516802	1.52618
Acrr	P0ACS9	ACRR_ECOLI	HTH-type transcriptional regulator AcrR	14.6008	12.9971	2.86602	0.0992598	0.968615	0.434711	0.622665	1.60373	0.361799
Acs	P27550	ACSA_ECOLI	Acetyl-coenzyme A synthetase	22.5641	21.7779	0.125155	0.155204	6.82992	0.00281592	0.0414664	0.786203	2.55038
Acui	P26646	ACUI_ECOLI	Probable acrylyl-CoA reductase AcuI	22.7694	23.3077	0.118533	0.0242054	-7.70711	0.0130272	0.0870821	-0.538323	1.88515
Add	P22333	ADD_ECOLI	Adenosine deaminase	20.2251	20.3233	0.102987	0.322432	-0.502437	0.657682	0.774103	-0.0981869	0.181984
Adhe	P0A9Q7	ADHE_ECOLI	Aldehyde-alcohol dehydrogenase	26.3607	26.1727	0.101533	0.192632	1.49514	0.230834	0.434511	0.187968	0.6367
Adhp	P39451	ADHP_ECOLI	Alcohol dehydrogenase, propanol-preferring	13.1177	15.5931	0.308389	2.15564	-1.96898	0.18276	0.385224	-2.47546	0.738119
Adk	P69441	KAD_ECOLI	Adenylate kinase	24.1844	24.1048	0.161467	0.293713	0.41137	0.707534	0.809036	0.0796043	0.150253
Agar	P0ACK2	AGAR_ECOLI	Putative aga operon transcriptional repressor	17.2522	20.3031	2.41981	3.03821	-1.36052	0.248596	0.452586	-3.05095	0.604506
Agp	P19926	AGP_ECOLI	Glucose-1-phosphatase	21.7912	21.5767	0.608203	0.815674	0.365166	0.7349	0.826265	0.214511	0.133772
Ahpc	P0AE08	AHPC_ECOLI	Alkyl hydroperoxide reductase subunit C	25.5415	25.8296	0.205289	0.3344	-1.27183	0.285213	0.492318	-0.288126	0.54483
Ahpf	P35340	AHPF_ECOLI	Alkyl hydroperoxide reductase subunit F	23.7576	23.6479	0.0746703	0.0497886	2.11659	0.111917	0.293274	0.109672	0.951106
Ais	P45565	AIS_ECOLI	Lipopolysaccharide core heptose(II)-phosphate phosphatase	23.0642	23.2109	0.338958	0.160708	-0.677255	0.549033	0.702762	-0.146679	0.260401
Alaa	P0A959	ALAA_ECOLI	Glutamate-pyruvate aminotransferase AlaA	21.3129	20.4884	0.0902965	0.134371	8.82173	0.00163826	0.0320714	0.824553	2.78562
Alac	P77434	ALAC_ECOLI	Glutamate-pyruvate aminotransferase AlaC	20.5934	20.2742	0.783109	0.208185	0.682285	0.557774	0.708982	0.319195	0.253541
Alas	P00957	SYA_ECOLI	Alanine--tRNA ligase	25.1633	25.2403	0.0597254	0.15544	-0.800975	0.490328	0.666954	-0.0770056	0.309513
Alda	P25553	ALDA_ECOLI	Lactaldehyde dehydrogenase	22.978	20.9392	0.0373212	0.226961	15.3526	0.00337148	0.0454824	2.03877	2.47218
Aldb	P37685	ALDB_ECOLI	Aldehyde dehydrogenase B	14.9189	16.6325	0.425741	1.40383	-2.02327	0.160343	0.356616	-1.71361	0.794949
Allr	P0ACN4	ALLR_ECOLI	HTH-type transcriptional repressor AllR	18.5916	17.6147	0.332194	0.665504	2.27472	0.109308	0.289631	0.976851	0.961348
Alr	P0A6B4	ALR1_ECOLI	Alanine racemase, biosynthetic	21.1774	20.6049	0.341194	0.517113	1.6005	0.195581	0.398833	0.572478	0.708673
Amn	P0AE12	AMN_ECOLI	AMP nucleosidase	22.8443	22.9067	0.197894	0.0777936	-0.508123	0.651235	0.771285	-0.0623797	0.186262
Ampd	P13016	AMPD_ECOLI	1,6-anhydro-N-acetylmuramyl-L-alanine amidase AmpD	14.5515	14.7518	2.78058	3.0154	-0.0845829	0.936683	0.964641	-0.200304	0.0284076
Ampe	P0AE14	AMPE_ECOLI	Protein AmpE	20.5094	20.6053	0.236107	0.168254	-0.572481	0.600701	0.730343	-0.0958263	0.221342
Amtb	P69681	AMTB_ECOLI	Ammonia channel	20.5214	15.2016	0.331023	2.18214	4.17476	0.0488925	0.179596	5.31979	1.31076
Anmk	P77570	ANMK_ECOLI	Anhydro-N-acetylmuramic acid kinase	19.3183	19.5907	0.622666	0.717553	-0.496533	0.646056	0.768665	-0.272354	0.18973
Ansa	P0A962	ASPG1_ECOLI	L-asparaginase 1	20.1408	19.5642	0.539504	0.266793	1.65923	0.198038	0.402364	0.576563	0.70325
Apag	P62672	APAG_ECOLI	Protein ApaG	15.0233	13.9987	1.87612	1.66576	0.707348	0.518898	0.684962	1.0246	0.284918
Apah	P05637	APAH_ECOLI	Bis(5'-nucleosyl)-tetraphosphatase [symmetrical]	19.0893	19.8783	0.721876	0.0513242	-1.88851	0.198287	0.402378	-0.789071	0.702705
Apt	P69503	APT_ECOLI	Adenine phosphoribosyltransferase	22.4706	22.192	0.383008	0.387294	0.885962	0.425695	0.617572	0.278617	0.370902
Arca	P0A9Q1	ARCA_ECOLI	Aerobic respiration control protein ArcA	23.6236	24.6145	0.166642	0.19196	-6.75117	0.00269196	0.0410957	-0.990823	2.56993
Arcb	P0AEC3	ARCB_ECOLI	Aerobic respiration control sensor protein ArcB	21.0612	22.2813	0.463331	0.0831998	-4.48952	0.0411107	0.164791	-1.22017	1.38605
Arga	P0A6C5	ARGA_ECOLI	Amino-acid acetyltransferase	21.6165	21.2016	0.320143	0.2084	1.8813	0.144689	0.33662	0.414912	0.839566
Argb	P0A6C8	ARGB_ECOLI	Acetylglutamate kinase	24.4193	24.2563	0.206656	0.412869	0.611452	0.584888	0.720928	0.162991	0.232927
Argc	P11446	ARGC_ECOLI	N-acetyl-gamma-glutamyl-phosphate reductase	22.6411	21.9294	0.682605	0.946802	1.05607	0.355977	0.560404	0.711674	0.448577
Argd	P18335	ARGD_ECOLI	Acetylornithine/succinyldiaminopimelate aminotransferase	23.7715	23.5045	0.0387146	0.136403	3.26118	0.0675417	0.219083	0.26697	1.17043
Arge	P23908	ARGE_ECOLI	Acetylornithine deacetylase	23.0005	23.802	0.0616992	0.158282	-8.17178	0.00641964	0.0597183	-0.801498	2.19249
Argg	P0A6E4	ASSY_ECOLI	Argininosuccinate synthase	24.9975	24.6661	0.0864574	0.0785496	4.91457	0.00814799	0.0661378	0.331444	2.08895
Argh	P11447	ARLY_ECOLI	Argininosuccinate lyase	24.9409	24.4516	0.0768564	0.199382	3.96626	0.0375694	0.158669	0.489315	1.42517
Argi	P04391	OTC1_ECOLI	Ornithine carbamoyltransferase chain I	21.3747	20.9982	0.388486	0.213952	1.47058	0.234638	0.43722	0.376553	0.629602
Argr	P0A6D0	ARGR_ECOLI	Arginine repressor	15.1854	19.5814	3.36472	0.296764	-2.25417	0.150965	0.343886	-4.396	0.821123
Args	P11875	SYR_ECOLI	Arginine--tRNA ligase	23.5139	23.4761	0.200522	0.138701	0.268941	0.802839	0.872583	0.0378583	0.0953713
Argt	P09551	ARGT_ECOLI	Lysine-arginine-ornithine-binding periplasmic protein	24.9158	23.6255	0.477012	0.259221	4.11685	0.0245806	0.125853	1.29039	1.60941
Arna	P77398	ARNA_ECOLI	Bifunctional polymyxin resistance protein ArnA	25.1471	25.2674	0.136658	0.210673	-0.830018	0.460366	0.640509	-0.120337	0.336897
Arnb	P77690	ARNB_ECOLI	UDP-4-amino-4-deoxy-L-arabinose--oxoglutarate aminotransferase	23.2592	23.1181	0.384455	0.0972014	0.616167	0.594266	0.725501	0.141071	0.226019
Arnc	P77757	ARNC_ECOLI	Undecaprenyl-phosphate 4-deoxy-4-formamido-L-arabinose transferase	22.5695	22.9306	0.0663169	0.243368	-2.47954	0.115252	0.298518	-0.3611	0.93835
Arnd	P76472	ARND_ECOLI	Probable 4-deoxy-4-formamido-L-arabinose-phosphoundecaprenol deformylase ArnD	22.1624	21.8991	0.170616	0.471781	0.908803	0.441982	0.626989	0.263233	0.354595
Arnt	P76473	ARNT_ECOLI	Undecaprenyl phosphate-alpha-4-amino-4-deoxy-L-arabinose arabinosyl transferase	20.8994	21.1137	0.116802	0.561069	-0.64773	0.578913	0.716216	-0.21432	0.237387
Aroa	P0A6D3	AROA_ECOLI	3-phosphoshikimate 1-carboxyvinyltransferase	24.5349	24.293	0.0467727	0.048468	6.21943	0.00341664	0.0454824	0.241861	2.4664
Arob	P07639	AROB_ECOLI	3-dehydroquinate synthase	21.63	21.9922	0.265711	0.179728	-1.95565	0.131931	0.324753	-0.362201	0.879653
Aroc	P12008	AROC_ECOLI	Chorismate synthase	22.6453	22.7772	0.0550342	0.0903283	-2.15934	0.111314	0.292155	-0.131867	0.95345
Arod	P05194	AROD_ECOLI	3-dehydroquinate dehydratase	22.3194	22.3447	0.346249	0.123863	-0.119218	0.914005	0.951755	-0.0253115	0.0390515
Aroe	P15770	AROE_ECOLI	Shikimate dehydrogenase	20.4037	20.5216	0.859003	0.552682	-0.19994	0.852859	0.908551	-0.117911	0.069123
Arof	P00888	AROF_ECOLI	Phospho-2-dehydro-3-deoxyheptonate aldolase, Tyr-sensitive	25.057	24.5834	0.0722645	0.145493	5.04905	0.0158572	0.0980908	0.473556	1.79977
Arog	P0AB91	AROG_ECOLI	Phospho-2-dehydro-3-deoxyheptonate aldolase, Phe-sensitive	24.8758	24.9652	0.0166134	0.138459	-1.11017	0.379758	0.586718	-0.0893823	0.420493
Aroh	P00887	AROH_ECOLI	Phospho-2-dehydro-3-deoxyheptonate aldolase, Trp-sensitive	22.7103	22.441	0.0591669	0.211313	2.12563	0.150009	0.343349	0.269304	0.823883
Arok	P0A6D7	AROK_ECOLI	Shikimate kinase 1	22.686	22.5248	0.149461	0.699071	0.39049	0.731029	0.8247	0.161167	0.136066
Arol	P0A6E1	AROL_ECOLI	Shikimate kinase 2	19.4963	19.4457	0.179204	0.24419	0.289779	0.787611	0.865252	0.0506748	0.103688
Arop	P15993	AROP_ECOLI	Aromatic amino acid transport protein AroP	20.3834	20.5628	0.296545	0.270591	-0.773684	0.482638	0.660183	-0.17932	0.316379
Arti	P30859	ARTI_ECOLI	Putative ABC transporter arginine-binding protein 2	21.0635	21.3156	0.606266	0.435586	-0.585034	0.592938	0.724411	-0.252152	0.226991
Artj	P30860	ARTJ_ECOLI	ABC transporter arginine-binding protein 1	23.0959	22.7672	0.239251	0.238951	1.6841	0.167447	0.368074	0.328779	0.776123
Artp	P0AAF6	ARTP_ECOLI	Arginine transport ATP-binding protein ArtP	20.2343	20.5608	0.260939	0.533789	-0.951602	0.413594	0.610118	-0.326433	0.383426
Artq	P0AE34	ARTQ_ECOLI	Arginine ABC transporter permease protein ArtQ	15.6412	14.5279	1.90533	2.62778	0.59411	0.587309	0.721241	1.11335	0.231133
Asd	P0A9Q9	DHAS_ECOLI	Aspartate-semialdehyde dehydrogenase	25.0218	25.33	0.319765	0.247133	-1.32076	0.261209	0.469894	-0.308169	0.583012
Asma	P28249	ASMA_ECOLI	Protein AsmA	20.244	20.5908	0.422705	0.0290295	-1.4178	0.290915	0.49854	-0.346828	0.536234
Asna	P00963	ASNA_ECOLI	Aspartate--ammonia ligase	24.453	22.5284	0.136488	0.115881	18.6176	5.92847e-05	0.00469761	1.92454	4.22706
Asnb	P22106	ASNB_ECOLI	Asparagine synthetase B [glutamine-hydrolyzing]	24.9087	24.2966	0.0621169	0.0381188	14.5467	0.000402978	0.0145773	0.612087	3.39472
Asns	P0A8M0	SYN_ECOLI	Asparagine--tRNA ligase	25.1852	25.1883	0.0435957	0.128695	-0.0391217	0.971752	0.983573	-0.00306907	0.0124447
Aspa	P0AC38	ASPA_ECOLI	Aspartate ammonia-lyase	20.3641	20.3391	0.262225	0.332675	0.102472	0.923569	0.957468	0.025061	0.0345307
Aspc	P00509	AAT_ECOLI	Aspartate aminotransferase	26.4795	26.2443	0.0178094	0.0508702	7.56027	0.00897126	0.0701145	0.235259	2.04715
Asps	P21889	SYD_ECOLI	Aspartate--tRNA ligase	25.5702	25.5535	0.0197504	0.0448032	0.59237	0.598765	0.729388	0.0167457	0.222744
Asta	P0AE37	ASTA_ECOLI	Arginine N-succinyltransferase	18.8856	15.8149	0.729039	1.62021	2.99361	0.0638766	0.211734	3.07074	1.19466
Astb	P76216	ASTB_ECOLI	N-succinylarginine dihydrolase	19.5785	17.8494	0.347815	1.78355	1.64815	0.232295	0.435401	1.72912	0.63396
Astc	P77581	ASTC_ECOLI	Succinylornithine transaminase	23.594	22.3157	0.389774	0.158493	5.26225	0.0182361	0.106338	1.27835	1.73907
Astd	P76217	ASTD_ECOLI	N-succinylglutamate 5-semialdehyde dehydrogenase	16.9263	12.9971	3.52433	0.0992598	1.93027	0.193131	0.397244	3.92922	0.714148
Aste	P76215	ASTE_ECOLI	Succinylglutamate desuccinylase	13.1177	12.9971	0.308389	0.0992598	0.644587	0.5752	0.714278	0.120566	0.240181
Atpa	P0ABB0	ATPA_ECOLI	ATP synthase subunit alpha	27.3043	26.8251	0.0364398	0.116715	6.788	0.0130139	0.0870821	0.479187	1.88559
Atpb	P0AB98	ATP6_ECOLI	ATP synthase subunit a	21.2278	19.9707	0.377324	0.318356	4.41029	0.0123454	0.0848871	1.25706	1.9085
Atpc	P0A6E6	ATPE_ECOLI	ATP synthase epsilon chain	21.2486	20.7187	0.538695	0.6944	1.04421	0.358706	0.563632	0.529837	0.445262
Atpd	P0ABB4	ATPB_ECOLI	ATP synthase subunit beta	26.8664	26.3669	0.0905125	0.0278953	9.13473	0.00663489	0.0603304	0.499513	2.17817
Atpe	P68699	ATPL_ECOLI	ATP synthase subunit c	23.72	22.73	0.102395	0.353249	4.66184	0.0317628	0.144015	0.989913	1.49808
Atpf	P0ABA0	ATPF_ECOLI	ATP synthase subunit b	24.2028	23.773	0.176831	0.0555878	4.01571	0.0418322	0.165342	0.429758	1.37849
Atpg	P0ABA6	ATPG_ECOLI	ATP synthase gamma chain	24.1879	23.808	0.174394	0.130845	3.01822	0.043235	0.166276	0.379918	1.36416
Atph	P0ABA4	ATPD_ECOLI	ATP synthase subunit delta	23.7629	23.4517	0.320065	0.435309	0.997528	0.379601	0.586718	0.311177	0.420673
Avta	P09053	AVTA_ECOLI	Valine--pyruvate aminotransferase	22.1419	22.2554	0.0751297	0.0918969	-1.65612	0.175847	0.382497	-0.113496	0.754864
Azor	P41407	AZOR_ECOLI	FMN-dependent NADH-azoreductase	20.6001	21.3256	0.437984	0.191694	-2.62826	0.086239	0.252794	-0.725476	1.0643
Baer	P69228	BAER_ECOLI	Transcriptional regulatory protein BaeR	19.9645	21.5626	0.700478	0.3459	-3.54306	0.0399516	0.163743	-1.59807	1.39847
Baes	P30847	BAES_ECOLI	Signal transduction histidine-protein kinase BaeS	14.1177	17.8414	0.308389	0.114843	-19.5995	0.000763338	0.0208229	-3.72378	3.11728
Bama	P0A940	BAMA_ECOLI	Outer membrane protein assembly factor BamA	24.8189	24.5941	0.263434	0.245178	1.08182	0.340482	0.545144	0.224775	0.467906
Bamb	P77774	BAMB_ECOLI	Outer membrane protein assembly factor BamB	23.4293	23.1872	0.22377	0.186813	1.4387	0.225803	0.428923	0.24213	0.64627
Bamc	P0A903	BAMC_ECOLI	Outer membrane protein assembly factor BamC	24.3506	24.6909	0.142235	0.0859668	-3.54614	0.0329313	0.146911	-0.340264	1.48239
Bamd	P0AC02	BAMD_ECOLI	Outer membrane protein assembly factor BamD	23.2266	22.9451	0.252368	0.233382	1.41831	0.229502	0.433475	0.281474	0.639213
Bame	P0A937	BAME_ECOLI	Outer membrane protein assembly factor BamE	19.359	19.4626	0.419671	0.448452	-0.29203	0.784844	0.863744	-0.103555	0.105217
Basr	P30843	BASR_ECOLI	Transcriptional regulatory protein BasR	22.1725	21.6651	0.132346	0.126229	4.80566	0.00866066	0.0683001	0.50744	2.06245
Bass	P30844	BASS_ECOLI	Sensor protein BasS	14.1177	18.2134	0.308389	0.227686	-18.5063	9.10886e-05	0.00631548	-4.09577	4.04054
Bcp	P0AE52	BCP_ECOLI	Putative peroxiredoxin bcp	22.401	22.7434	0.705422	0.254375	-0.790971	0.496798	0.670457	-0.342448	0.303821
Bcsb	P37652	BCSB_ECOLI	Cyclic di-GMP-binding protein	21.5351	22.2669	0.249376	0.204987	-3.92605	0.0184116	0.106338	-0.731721	1.73491
Bcsc	P37650	BCSC_ECOLI	Cellulose synthase operon protein C	18.7065	18.952	0.349036	0.525852	-0.673755	0.542587	0.698807	-0.245512	0.265531
Bcsg	P37659	BCSG_ECOLI	Protein BcsG homolog	18.6511	19.0672	0.209887	0.146717	-2.8141	0.0547064	0.192863	-0.416063	1.26196
Bcsz	P37651	GUN_ECOLI	Endoglucanase	15.966	16.4701	0.507239	0.279936	-1.50707	0.225627	0.428923	-0.504105	0.646609
Bepa	P66948	BEPA_ECOLI	Beta-barrel assembly-enhancing protease	21.5424	20.8686	0.230214	0.0392434	4.99675	0.0336489	0.148519	0.673718	1.47303
Betb	P17445	BETB_ECOLI	NAD/NADP-dependent betaine aldehyde dehydrogenase	20.6483	20.5687	0.0879744	0.313816	0.422741	0.708608	0.809036	0.0795457	0.149594
Bfr	P0ABD3	BFR_ECOLI	Bacterioferritin	18.7785	18.4962	0.523073	0.449418	0.708951	0.518322	0.684962	0.282272	0.2854
Bgla	Q46829	BGLA_ECOLI	6-phospho-beta-glucosidase BglA	22.608	22.5309	0.0289629	0.123561	1.05347	0.393164	0.596004	0.0771893	0.405427
Bglj	P39404	BGLJ_ECOLI	Transcriptional activator protein BglJ	16.8704	14.9758	3.47433	3.52307	0.663192	0.543482	0.698882	1.89457	0.264815
Bglx	P33363	BGLX_ECOLI	Periplasmic beta-glucosidase	23.0493	22.6395	0.0772218	0.0432833	8.01886	0.00340824	0.0454824	0.409843	2.46747
Bhsa	P0AB40	BHSA_ECOLI	Multiple stress resistance protein BhsA	14.1177	14.3276	0.308389	0.555545	-0.572379	0.605654	0.732952	-0.209976	0.217775
Bioa	P12995	BIOA_ECOLI	Adenosylmethionine-8-amino-7-oxononanoate aminotransferase	22.0944	16.167	0.0896385	0.0992598	76.7619	1.97225e-07	0.000242083	5.92736	6.70504
Biob	P12996	BIOB_ECOLI	Biotin synthase	21.34	17.1521	0.136256	2.43015	2.98015	0.0958419	0.268639	4.18785	1.01844
Biod1	P13000	BIOD1_ECOLI	ATP-dependent dethiobiotin synthetase BioD 1	23.737	16.167	0.136601	0.0992598	77.6495	5.19866e-07	0.000242083	7.56998	6.28411
Biof	P12998	BIOF_ECOLI	8-amino-7-oxononanoate synthase	22.2994	16.6975	0.0684877	0.0992598	80.4567	6.37656e-07	0.000242083	5.60183	6.19541
Bira	P06709	BIRA_ECOLI	Bifunctional ligase/repressor BirA	15.5574	17.4006	2.79082	2.88948	-0.79474	0.471306	0.650292	-1.84326	0.326697
Bisc	P20099	BISC_ECOLI	Biotin sulfoxide reductase	18.4257	17.1904	0.354601	2.2039	0.958424	0.434693	0.622665	1.2352	0.361817
Bola	P0ABE2	BOLA_ECOLI	Protein BolA	20.2109	19.5045	0.451143	0.528111	1.76146	0.154703	0.34875	0.706367	0.810502
Brnq	P0AD99	BRNQ_ECOLI	Branched-chain amino acid transport system 2 carrier protein	14.1177	19.3456	0.308389	1.53656	-5.77787	0.023929	0.123632	-5.22795	1.62108
Btue	P06610	BTUE_ECOLI	Vitamin B12 transport periplasmic protein BtuE	21.8783	22.655	0.351825	0.34063	-2.74695	0.0515951	0.185985	-0.776645	1.28739
Btuf	P37028	BTUF_ECOLI	Vitamin B12-binding protein	18.942	18.534	0.726705	0.355604	0.873612	0.448517	0.632654	0.408067	0.348221
Btur	P0A9H5	BTUR_ECOLI	Cob(I)yrinic acid a,c-diamide adenosyltransferase	19.1132	19.3265	0.0393699	0.308374	-1.1884	0.353374	0.55853	-0.2133	0.451765
Can	P61517	CAN_ECOLI	Carbonic anhydrase 2	23.9255	25.0768	0.144351	0.232648	-7.28379	0.00367967	0.0473317	-1.15138	2.43419
Cara	P0A6F1	CARA_ECOLI	Carbamoyl-phosphate synthase small chain	24.6196	24.4196	0.0618883	0.0287322	5.0773	0.0170625	0.104714	0.200016	1.76796
Carb	P00968	CARB_ECOLI	Carbamoyl-phosphate synthase large chain	26.7529	26.8433	0.0758203	0.218168	-0.67795	0.555672	0.70745	-0.0904038	0.255182
Cbpm	P63264	CBPM_ECOLI	Chaperone modulatory protein CbpM	13.1177	12.9971	0.308389	0.0992598	0.644587	0.5752	0.714278	0.120566	0.240181
Cca	P06961	CCA_ECOLI	Multifunctional CCA protein	16.802	19.3514	0.897423	1.26424	-2.84816	0.0524749	0.187496	-2.54942	1.28005
Cdd	P0ABF6	CDD_ECOLI	Cytidine deaminase	20.8181	21.6604	0.381602	0.0988129	-3.70132	0.0542026	0.192095	-0.842362	1.26598
Cdsa	P0ABG1	CDSA_ECOLI	Phosphatidate cytidylyltransferase	20.1933	16.6964	0.124444	0.15531	30.4339	1.06366e-05	0.00147494	3.49693	4.9732
Cfa	P0A9H7	CFA_ECOLI	Cyclopropane-fatty-acyl-phospholipid synthase	17.6693	24.8839	0.275233	0.114267	-41.9319	7.69002e-05	0.00556356	-7.21464	4.11407
Ch35j_004633	A0A4V4ND72	A0A4V4ND72_9PEZI	Red fluorescent protein	16.7026	16.5821	0.308389	0.0992598	0.644587	0.5752	0.714278	0.120566	0.240181
Chab	P0AE63	CHAB_ECOLI	Cation transport regulator ChaB	18.8142	14.9776	0.142425	3.52629	1.88291	0.200001	0.404535	3.83656	0.698968
Chbb	P69795	PTQB_ECOLI	N,N'-diacetylchitobiose-specific phosphotransferase enzyme IIB component	16.4392	15.3129	0.350459	1.9419	0.988568	0.421578	0.614816	1.12624	0.375122
Cira	P17315	CIRA_ECOLI	Colicin I receptor	23.5681	25.1331	0.668195	0.252342	-3.79515	0.0421633	0.165471	-1.56503	1.37507
Clpa	P0ABH9	CLPA_ECOLI	ATP-dependent Clp protease ATP-binding subunit ClpA	22.5518	21.9283	0.255774	0.303367	2.72171	0.0545329	0.19266	0.623528	1.26334
Clpb	P63284	CLPB_ECOLI	Chaperone protein ClpB	25.4449	26.1705	0.0917889	0.0633549	-11.2677	0.000660483	0.019607	-0.725553	3.18014
Clpp	P0A6G7	CLPP_ECOLI	ATP-dependent Clp protease proteolytic subunit	23.2291	23.4644	0.145833	0.0966768	-2.32941	0.0902633	0.25941	-0.235311	1.04449
Clpx	P0A6H1	CLPX_ECOLI	ATP-dependent Clp protease ATP-binding subunit ClpX	22.7485	22.7509	0.0474007	0.130161	-0.0303955	0.977993	0.986676	-0.00243093	0.00966443
Cls	P0A6H8	CLS_ECOLI	Cardiolipin synthase	19.5197	20.6416	0.638773	0.04844	-3.03348	0.092355	0.263149	-1.12195	1.03454
Cmk	P0A6I0	KCY_ECOLI	Cytidylate kinase	20.0752	20.2665	0.512085	0.932793	-0.311365	0.775263	0.857738	-0.191292	0.110551
Cmoa	P76290	CMOA_ECOLI	tRNA (cmo5U34)-methyltransferase	22.5299	22.4437	0.13286	0.453197	0.316245	0.777834	0.859439	0.086229	0.109113
Cmob	P76291	CMOB_ECOLI	tRNA (mo5U34)-methyltransferase	19.128	18.9342	0.246702	0.177948	1.10323	0.337507	0.54367	0.19375	0.471717
Coaa	P0A6I3	COAA_ECOLI	Pantothenate kinase	19.2497	19.9378	0.398573	0.758621	-1.39083	0.257755	0.466391	-0.688129	0.588793
Coabc	P0ABQ0	COABC_ECOLI	Coenzyme A biosynthesis bifunctional protein CoaBC	20.6119	21.1463	0.0430127	0.253716	-3.5974	0.0637857	0.211734	-0.534477	1.19528
Coad	P0A6I6	COAD_ECOLI	Phosphopantetheine adenylyltransferase	19.9461	19.5157	0.484275	0.465406	1.11006	0.3293	0.535424	0.43046	0.482409
Cobt	P36562	COBT_ECOLI	Nicotinate-nucleotide--dimethylbenzimidazole phosphoribosyltransferase	15.7761	17.0115	3.16945	2.95758	-0.493606	0.647576	0.768665	-1.23542	0.188709
Coda	P25524	CODA_ECOLI	Cytosine deaminase	23.2924	23.2994	0.0942471	0.0722048	-0.101847	0.924094	0.957468	-0.00698127	0.0342837
Copa	Q59385	COPA_ECOLI	Copper-exporting P-type ATPase A	23.4725	22.417	0.0797457	0.207444	8.22645	0.00644423	0.0597183	1.05556	2.19083
Cora	P0ABI4	CORA_ECOLI	Magnesium transport protein CorA	20.2777	20.3394	0.129659	0.368244	-0.27362	0.805469	0.873545	-0.0616739	0.0939514
Corc	P0AE78	CORC_ECOLI	Magnesium and cobalt efflux protein CorC	21.2824	20.7355	0.106955	0.440985	2.08746	0.158571	0.354653	0.546881	0.799776
Cpda	P0AEW4	CPDA_ECOLI	3',5'-cyclic adenosine monophosphate phosphodiesterase CpdA	18.9791	16.9925	0.215852	2.63155	1.30317	0.320886	0.525545	1.98659	0.493649
Cpdb	P08331	CPDB_ECOLI	2',3'-cyclic-nucleotide 2'-phosphodiesterase/3'-nucleotidase	22.1806	22.199	0.13525	0.161378	-0.151348	0.88724	0.932639	-0.0183989	0.0519589
Cptb	P64559	CPTB_ECOLI	Antitoxin CptB	16.9131	15.6488	2.68576	2.8372	0.560498	0.605132	0.732852	1.26425	0.21815
Cpxa	P0AE82	CPXA_ECOLI	Sensor protein CpxA	19.2369	18.5817	0.65606	1.46343	0.707551	0.534044	0.694021	0.655143	0.272423
Cpxr	P0AE88	CPXR_ECOLI	Transcriptional regulatory protein CpxR	22.1103	22.5068	0.190622	0.395367	-1.56453	0.219294	0.421855	-0.396469	0.658974
Cra	P0ACP1	CRA_ECOLI	Catabolite repressor/activator	21.7193	21.1006	0.125863	0.162905	5.20559	0.00767626	0.0641874	0.618711	2.11485
Crea	P0AE91	CREA_ECOLI	Protein CreA	20.4458	20.7394	0.196188	0.198728	-1.82093	0.142735	0.335941	-0.293583	0.845471
Creb	P08368	CREB_ECOLI	Transcriptional regulatory protein CreB	16.8891	15.4436	2.63423	2.6014	0.676225	0.535986	0.694021	1.44542	0.270847
Crl	P24251	CRL_ECOLI	Sigma factor-binding protein Crl	19.2721	20.2265	1.20931	0.327231	-1.31951	0.303371	0.511288	-0.954411	0.518026
Crp	P0ACJ8	CRP_ECOLI	cAMP-activated global transcriptional regulator CRP	23.7453	24.3677	0.182532	0.30772	-3.01318	0.0514535	0.185985	-0.622424	1.28859
Crr	P69783	PTGA_ECOLI	Glucose-specific phosphotransferase enzyme IIA component	24.2151	24.8205	0.421817	0.334154	-1.94844	0.126887	0.321218	-0.605364	0.896584
Csda	Q46925	CSDA_ECOLI	Cysteine desulfurase CsdA	19.3602	19.3078	0.95776	0.565745	0.0815172	0.939803	0.965925	0.0523526	0.0269632
Csde	P0AGF2	CSDE_ECOLI	Sulfur acceptor protein CsdE	17.8179	18.4265	2.5787	1.27851	-0.366186	0.739086	0.828174	-0.608513	0.131305
Csgd	P52106	CSGD_ECOLI	CsgBAC operon transcriptional regulatory protein	20.4446	21.2576	0.11374	0.23512	-5.39127	0.0137882	0.0892748	-0.812983	1.86049
Cspa	P0A9X9	CSPA_ECOLI	Cold shock protein CspA	16.3542	20.9833	3.15754	0.507868	-2.50707	0.122914	0.31466	-4.62915	0.910398
Cspc	P0A9Y6	CSPC_ECOLI	Cold shock-like protein CspC	24.2045	24.499	0.542412	0.404775	-0.753707	0.496132	0.670457	-0.29451	0.304403
Cspd	P0A968	CSPD_ECOLI	Cold shock-like protein CspD	14.1177	16.3673	0.308389	1.95686	-1.9669	0.182025	0.385224	-2.24962	0.73987
Csra	P69913	CSRA_ECOLI	Carbon storage regulator	20.5856	21.28	0.237236	0.16272	-4.18092	0.0178931	0.106338	-0.694414	1.74732
Cueo	P36649	CUEO_ECOLI	Blue copper oxidase CueO	21.9617	19.5959	0.346673	1.20496	3.26816	0.0669083	0.217877	2.36583	1.17452
Cura	P76113	CURA_ECOLI	NADPH-dependent curcumin reductase	20.0888	21.9366	0.0510422	0.0477288	-45.798	1.4279e-06	0.000339433	-1.84776	5.8453
Cusa	P38054	CUSA_ECOLI	Cation efflux system protein CusA	20.639	17.8531	0.828549	0.394562	5.25805	0.0150593	0.0942053	2.7859	1.8222
Cusb	P77239	CUSB_ECOLI	Cation efflux system protein CusB	21.1292	19.9652	0.153632	0.290909	6.12835	0.00844475	0.067591	1.16401	2.07341
Cusc	P77211	CUSC_ECOLI	Cation efflux system protein CusC	20.5414	18.7612	1.43104	2.2988	1.13874	0.329688	0.535424	1.78027	0.481897
Cusf	P77214	CUSF_ECOLI	Cation efflux system protein CusF	18.7581	15.7963	1.31085	0.960492	3.15672	0.038681	0.161429	2.96177	1.4125
Cusr	P0ACZ8	CUSR_ECOLI	Transcriptional regulatory protein CusR	18.0111	17.5807	0.823947	0.287793	0.854087	0.467549	0.646181	0.430365	0.330173
Cuta	P69488	CUTA_ECOLI	Divalent-cation tolerance protein CutA	14.7581	17.8558	1.40777	1.01526	-3.09118	0.0414949	0.164791	-3.09765	1.38201
Cutc	P67826	CUTC_ECOLI	Copper homeostasis protein CutC	16.7465	16.9	2.50154	2.42255	-0.0763354	0.942821	0.966736	-0.153473	0.0255705
Cvra	P76007	NHAP2_ECOLI	K(+)/H(+) antiporter NhaP2	16.9822	15.5163	2.55515	2.72724	0.679382	0.534325	0.694021	1.46588	0.272194
Cyay	P27838	CYAY_ECOLI	Protein CyaY	20.2272	20.7882	0.708521	0.342948	-1.23455	0.307926	0.514447	-0.561059	0.511553
Cyca	P0AAE0	CYCA_ECOLI	D-serine/D-alanine/glycine transporter	20.0676	19.8449	0.140624	0.202961	1.56242	0.201831	0.407087	0.222736	0.695012
Cyda	P0ABJ9	CYDA_ECOLI	Cytochrome bd-I ubiquinol oxidase subunit 1	23.3449	21.397	0.150578	0.272753	10.8289	0.0014195	0.0295255	1.94788	2.84787
Cydb	P0ABK2	CYDB_ECOLI	Cytochrome bd-I ubiquinol oxidase subunit 2	20.3323	14.5821	0.404715	0.0992598	23.9007	0.000961954	0.0238688	5.75022	3.01685
Cydc	P23886	CYDC_ECOLI	ATP-binding/permease protein CydC	19.8956	20.9781	1.37756	0.254862	-1.33845	0.305366	0.512743	-1.08258	0.51518
Cydd	P29018	CYDD_ECOLI	ATP-binding/permease protein CydD	19.9784	19.6044	0.390413	0.588543	0.917348	0.418105	0.61382	0.374058	0.378715
Cyns	P00816	CYNS_ECOLI	Cyanate hydratase	26.4157	27.0005	0.185792	0.24621	-3.28366	0.0338263	0.14888	-0.584756	1.47074
Cyoa	P0ABJ1	CYOA_ECOLI	Cytochrome bo(3) ubiquinol oxidase subunit 2	21.6729	21.774	0.180376	0.0326998	-0.955247	0.434891	0.622665	-0.101101	0.361619
Cyob	P0ABI8	CYOB_ECOLI	Cytochrome bo(3) ubiquinol oxidase subunit 1	22.3718	22.7912	0.0906529	0.330144	-2.12162	0.15107	0.343886	-0.419368	0.820821
Cysa	P16676	CYSA_ECOLI	Sulfate/thiosulfate import ATP-binding protein CysA	21.8084	21.0934	0.298835	0.208253	3.40021	0.032508	0.145412	0.715046	1.48801
Cysb	P0A9F3	CYSB_ECOLI	HTH-type transcriptional regulator CysB	21.7707	21.6476	0.207403	0.0765909	0.964451	0.417551	0.613785	0.12311	0.37929
Cysc	P0A6J1	CYSC_ECOLI	Adenylyl-sulfate kinase	20.8844	19.9043	0.266304	0.598597	2.59096	0.0881291	0.254595	0.980051	1.05488
Cysd	P21156	CYSD_ECOLI	Sulfate adenylyltransferase subunit 2	21.0222	19.852	0.290466	0.284174	4.98757	0.00756614	0.0641874	1.17013	2.12113
Cyse	P0A9D4	CYSE_ECOLI	Serine acetyltransferase	21.2586	20.4383	0.572451	0.906714	1.32505	0.267708	0.475926	0.820332	0.572338
Cysg	P0AEA8	CYSG_ECOLI	Siroheme synthase	21.0425	20.9946	0.0288242	0.299499	0.276124	0.807951	0.874142	0.0479668	0.092615
Cysh	P17854	CYSH_ECOLI	Phosphoadenosine phosphosulfate reductase	20.717	18.3129	0.197309	0.185804	15.364	0.000107236	0.00701903	2.40409	3.96966
Cysi	P17846	CYSI_ECOLI	Sulfite reductase [NADPH] hemoprotein beta-component	25.0187	23.4974	0.0899371	0.121354	17.4453	0.000111552	0.00701903	1.52136	3.95252
Cysj	P38038	CYSJ_ECOLI	Sulfite reductase [NADPH] flavoprotein alpha-component	24.4279	23.4012	0.134222	0.271366	5.87392	0.010578	0.0768011	1.0267	1.9756
Cysk	P0ABK5	CYSK_ECOLI	Cysteine synthase A	25.0749	25.8063	0.0744979	0.0126727	-16.7643	0.00275903	0.0413844	-0.731414	2.55924
Cysm	P16703	CYSM_ECOLI	Cysteine synthase B	20.67	19.6894	0.542122	0.586088	2.12728	0.100933	0.278385	0.980547	0.995968
Cysn	P23845	CYSN_ECOLI	Sulfate adenylyltransferase subunit 1	23.3791	22.7288	0.146018	0.0425957	7.40424	0.011332	0.0792977	0.650222	1.94569
Cysp	P16700	CYSP_ECOLI	Thiosulfate-binding protein	24.2278	24.0242	0.477446	0.273947	0.640506	0.564923	0.714278	0.203557	0.248011
Cysq	P22255	CYSQ_ECOLI	3'(2'),5'-bisphosphate nucleotidase CysQ	21.4583	22.4991	0.444422	0.177752	-3.76597	0.0411461	0.164791	-1.04072	1.38567
Cyss	P21888	SYC_ECOLI	Cysteine--tRNA ligase	23.1394	23.1775	0.169097	0.0474781	-0.376216	0.73851	0.828086	-0.0381495	0.131644
Daca	P0AEB2	DACA_ECOLI	D-alanyl-D-alanine carboxypeptidase DacA	23.7281	23.5686	0.0439811	0.153791	1.72793	0.208325	0.41171	0.159576	0.681258
Dacb	P24228	DACB_ECOLI	D-alanyl-D-alanine carboxypeptidase DacB	18.0209	16.1067	0.937117	1.86057	1.59158	0.211132	0.413322	1.9143	0.675446
Dacc	P08506	DACC_ECOLI	D-alanyl-D-alanine carboxypeptidase DacC	21.9152	22.0999	0.176834	0.284617	-0.954809	0.403481	0.602686	-0.184715	0.394177
Dada	P0A6J5	DADA_ECOLI	D-amino acid dehydrogenase small subunit	21.0991	24.3885	0.714008	0.127422	-7.85542	0.0132155	0.0879624	-3.28942	1.87892
Dadx	P29012	ALR2_ECOLI	Alanine racemase, catabolic	18.1119	21.793	0.235843	0.523061	-11.1122	0.00218895	0.0367921	-3.68112	2.65976
Damx	P11557	DAMX_ECOLI	Protein DamX	22.0407	22.3006	0.4442	0.226143	-0.903081	0.433628	0.622665	-0.25989	0.362882
Dapa	P0A6L2	DAPA_ECOLI	4-hydroxy-tetrahydrodipicolinate synthase	23.5078	24.0202	0.0966875	0.0126168	-9.10071	0.0106617	0.0768011	-0.512332	1.97217
Dapb	P04036	DAPB_ECOLI	4-hydroxy-tetrahydrodipicolinate reductase	22.7258	22.2714	0.0501643	0.0665173	9.44657	0.000986991	0.0238688	0.454385	3.00569
Dapd	P0A9D8	DAPD_ECOLI	2,3,4,5-tetrahydropyridine-2,6-dicarboxylate N-succinyltransferase	25.4616	25.222	0.136221	0.191602	1.76488	0.160034	0.356489	0.239546	0.795787
Dape	P0AED7	DAPE_ECOLI	Succinyl-diaminopimelate desuccinylase	21.5394	21.1523	0.43154	0.0934322	1.51843	0.25786	0.466391	0.387081	0.588615
Dapf	P0A6K1	DAPF_ECOLI	Diaminopimelate epimerase	21.2024	21.155	0.140195	0.285302	0.258521	0.813192	0.87867	0.0474468	0.0898069
Daua	P0AFR2	DAUA_ECOLI	C4-dicarboxylic acid transporter DauA	16.6114	14.5485	2.72994	2.78308	0.916526	0.411267	0.608692	2.0629	0.385876
Dcd	P28248	DCD_ECOLI	Deoxycytidine triphosphate deaminase	21.2035	21.0321	0.109959	0.544185	0.534821	0.642694	0.765528	0.171429	0.191996
Dcp	P24171	DCP_ECOLI	Peptidyl-dipeptidase dcp	23.0365	23.542	0.25821	0.116941	-3.08884	0.059246	0.202434	-0.505499	1.22734
Dcrb	P0AEE1	DCRB_ECOLI	Protein DcrB	22.7452	22.4701	0.164969	0.280254	1.46517	0.232669	0.435501	0.275095	0.633262
Dcta	P0A830	DCTA_ECOLI	Aerobic C4-dicarboxylate transport protein	21.0548	19.0491	0.342103	0.561008	5.28684	0.0102768	0.0750023	2.00567	1.98814
Dcua	P0ABN5	DCUA_ECOLI	Anaerobic C4-dicarboxylate transporter DcuA	20.4704	20.4727	0.0920094	0.398874	-0.00958717	0.993146	0.997342	-0.00226581	0.00298686
Ddla	P0A6J8	DDLA_ECOLI	D-alanine--D-alanine ligase A	20.6684	21.0562	0.196806	0.102045	-3.02985	0.0562471	0.196629	-0.387797	1.2499
Ddlb	P07862	DDLB_ECOLI	D-alanine--D-alanine ligase B	22.0421	22.2386	0.384952	0.17111	-0.807857	0.482928	0.660183	-0.196486	0.316117
Ddpa	P76128	DDPA_ECOLI	Probable D,D-dipeptide-binding periplasmic protein DdpA	19.0301	16.1474	1.66872	1.36609	2.31522	0.0841321	0.251335	2.88268	1.07504
Dead	P0A9P6	DEAD_ECOLI	ATP-dependent RNA helicase DeaD	22.2185	22.4875	0.0464321	0.169258	-2.65464	0.101541	0.279281	-0.268998	0.993357
Deda	P0ABP6	DEDA_ECOLI	Protein DedA	14.2387	15.4813	1.89332	2.05711	-0.769771	0.484651	0.661328	-1.24252	0.314571
Dedd	P09549	DEDD_ECOLI	Protein DedD	17.3435	16.8021	1.59189	0.359841	0.574596	0.618816	0.745086	0.541423	0.208439
Def	P0A6K3	DEF_ECOLI	Peptide deformylase	20.9775	20.4212	0.574177	0.815354	0.966076	0.394448	0.596692	0.556223	0.404011
Degp	P0C0V0	DEGP_ECOLI	Periplasmic serine endoprotease DegP	24.0224	23.937	0.055374	0.139894	0.983652	0.40743	0.606408	0.0854447	0.389947
Degq	P39099	DEGQ_ECOLI	Periplasmic pH-dependent serine endoprotease DegQ	22.4383	22.8186	0.155442	0.0428632	-4.08567	0.0431213	0.166276	-0.380351	1.36531
Degs	P0AEE3	DEGS_ECOLI	Serine endoprotease DegS	18.995	18.2779	0.930657	1.75117	0.62632	0.574901	0.714278	0.717102	0.240407
Deoa	P07650	TYPH_ECOLI	Thymidine phosphorylase	21.9985	22.6804	0.259998	0.0524448	-4.45312	0.0405606	0.164791	-0.681921	1.3919
Deob	P0A6K6	DEOB_ECOLI	Phosphopentomutase	23.2446	24.2894	0.165306	0.0714933	-10.0473	0.00313841	0.0442569	-1.04475	2.50329
Deoc	P0A6L0	DEOC_ECOLI	Deoxyribose-phosphate aldolase	23.7084	23.3586	0.146284	0.564951	1.0383	0.397021	0.598408	0.349836	0.401187
Deod	P0ABP8	DEOD_ECOLI	Purine nucleoside phosphorylase DeoD-type	23.5681	23.6985	0.0818101	0.256096	-0.840067	0.476141	0.654251	-0.130393	0.322265
Deor	P0ACK5	DEOR_ECOLI	Deoxyribose operon repressor	20.6952	20.5509	0.310299	0.209273	0.667573	0.545735	0.700157	0.144254	0.263018
Der	P0A6P5	DER_ECOLI	GTPase Der	22.5246	22.475	0.116103	0.255255	0.306577	0.780579	0.861095	0.0496349	0.107583
Dgka	P0ABN1	KDGL_ECOLI	Diacylglycerol kinase	21.1988	21.5181	0.207328	0.217268	-1.84137	0.139533	0.33264	-0.319272	0.855324
Dgt	P15723	DGTP_ECOLI	Deoxyguanosinetriphosphate triphosphohydrolase	15.7945	18.337	2.5541	0.691295	-1.66431	0.221931	0.424963	-2.54251	0.653782
Dhak	P76015	DHAK_ECOLI	PTS-dependent dihydroxyacetone kinase, dihydroxyacetone-binding subunit DhaK	22.2186	21.7681	0.315026	0.257245	1.91834	0.130355	0.322964	0.450458	0.884872
Dhal	P76014	DHAL_ECOLI	PTS-dependent dihydroxyacetone kinase, ADP-binding subunit DhaL	20.1308	20.1911	0.287435	0.574721	-0.16255	0.881395	0.930266	-0.0603059	0.0548292
Dham	P37349	DHAM_ECOLI	PTS-dependent dihydroxyacetone kinase, phosphotransferase subunit DhaM	20.1733	21.3868	0.476941	0.352227	-3.54486	0.027421	0.133596	-1.21346	1.56192
Diaa	P66817	DIAA_ECOLI	DnaA initiator-associating protein DiaA	19.0687	19.3925	0.387712	0.446573	-0.948105	0.397747	0.598798	-0.323723	0.400393
Dini	P0ABR1	DINI_ECOLI	DNA-damage-inducible protein I	18.3142	14.3665	0.354787	2.4678	2.74254	0.106445	0.284765	3.9477	0.972877
Djla	P31680	DJLA_ECOLI	DnaJ-like protein DjlA	20.4667	20.1009	0.122705	0.0610494	4.62293	0.0200204	0.110311	0.365801	1.69853
Dkga	Q46857	DKGA_ECOLI	2,5-diketo-D-gluconic acid reductase A	20.2208	21.6697	0.874862	0.396262	-2.61297	0.085743	0.252794	-1.44889	1.0668
Dkgb	P30863	DKGB_ECOLI	2,5-diketo-D-gluconic acid reductase B	17.3721	17.9779	0.729546	0.320428	-1.31688	0.287059	0.494479	-0.605815	0.542028
Dksa	P0ABS1	DKSA_ECOLI	RNA polymerase-binding transcription factor DksA	21.6687	22.0286	0.214649	0.345304	-1.53329	0.213493	0.415126	-0.359924	0.670616
Dld	P06149	DLD_ECOLI	D-lactate dehydrogenase	22.5832	22.4064	0.0750287	0.133726	1.99661	0.135534	0.329153	0.176757	0.867952
Dmsd	P69853	DMSD_ECOLI	Tat proofreading chaperone DmsD	18.9406	20.1436	1.6447	1.20835	-1.02101	0.369733	0.57799	-1.20306	0.432112
Dnaa	P03004	DNAA_ECOLI	Chromosomal replication initiator protein DnaA	21.2972	21.1375	0.0583312	0.143613	1.78434	0.18465	0.385224	0.159687	0.73365
Dnab	P0ACB0	DNAB_ECOLI	Replicative DNA helicase	22	22.3524	0.757772	0.274872	-0.757124	0.513492	0.682469	-0.35236	0.289466
Dnac	P0AEF0	DNAC_ECOLI	DNA replication protein DnaC	13.1177	16.2989	0.308389	0.0106956	-17.8567	0.00308811	0.0442569	-3.18127	2.51031
Dnae	P10443	DPO3A_ECOLI	DNA polymerase III subunit alpha	18.9707	19.1833	0.212687	1.59737	-0.228442	0.839887	0.898183	-0.212539	0.0757789
Dnaj	P08622	DNAJ_ECOLI	Chaperone protein DnaJ	22.8387	22.4648	0.143015	0.964295	0.664351	0.572285	0.714278	0.373914	0.242388
Dnak	P0A6Y8	DNAK_ECOLI	Chaperone protein DnaK	26.2148	26.5512	0.11222	0.100228	-3.87258	0.0183843	0.106338	-0.33641	1.73555
Dnan	P0A988	DPO3B_ECOLI	DNA polymerase III subunit beta	21.6711	21.803	0.0586881	0.276023	-0.809534	0.49705	0.670457	-0.131893	0.3036
Dnax	P06710	DPO3X_ECOLI	DNA polymerase III subunit tau	20.5709	20.7774	0.12723	0.0790443	-2.38798	0.0880278	0.254595	-0.206509	1.05538
Dosc	P0AA89	DOSC_ECOLI	Diguanylate cyclase DosC	14.4509	17.7062	2.257	0.234995	-2.48466	0.128279	0.322251	-3.25522	0.891843
Dppa	P23847	DPPA_ECOLI	Periplasmic dipeptide transport protein	25.2169	25.413	0.28826	0.25495	-0.882352	0.428116	0.618926	-0.196042	0.368439
Dppb	P0AEF8	DPPB_ECOLI	Dipeptide transport system permease protein DppB	19.6027	18.6577	0.278296	0.608943	2.4447	0.0981942	0.273694	0.944999	1.00791
Dppd	P0AAG0	DPPD_ECOLI	Dipeptide transport ATP-binding protein DppD	20.6776	18.7455	0.371771	0.829128	3.68275	0.0395516	0.163589	1.93203	1.40284
Dppf	P37313	DPPF_ECOLI	Dipeptide transport ATP-binding protein DppF	20.6643	16.2193	0.0888883	2.9317	2.62492	0.119417	0.307599	4.44503	0.922935
Dps	P0ABT2	DPS_ECOLI	DNA protection during starvation protein	23.6141	24.7759	0.336117	0.284874	-4.56733	0.0109387	0.0778321	-1.16184	1.96104
Dsba	P0AEG4	DSBA_ECOLI	Thiol:disulfide interchange protein DsbA	22.5622	22.8163	0.728089	0.289285	-0.561838	0.618714	0.745086	-0.254135	0.20851
Dsbb	P0A6M2	DSBB_ECOLI	Disulfide bond formation protein B	19.0402	19.2162	0.0717467	0.313053	-0.949207	0.434438	0.622665	-0.176009	0.362072
Dsbc	P0AEG6	DSBC_ECOLI	Thiol:disulfide interchange protein DsbC	20.0651	20.6255	0.644193	0.283287	-1.37925	0.26942	0.476425	-0.560389	0.569569
Dsbd	P36655	DSBD_ECOLI	Thiol:disulfide interchange protein DsbD	17.7292	18.0696	0.409327	0.111299	-1.38971	0.284108	0.491829	-0.340348	0.546517
Dsbg	P77202	DSBG_ECOLI	Thiol:disulfide interchange protein DsbG	17.8429	18.3972	1.50532	0.515839	-0.60338	0.597204	0.728554	-0.55433	0.223877
Dsda	P00926	SDHD_ECOLI	D-serine dehydratase	18.2624	18.4887	0.0888565	0.342381	-1.10822	0.371354	0.579674	-0.226324	0.430212
Dtd	P0A6M4	DTD_ECOLI	D-tyrosyl-tRNA(Tyr) deacylase	19.5868	20.2	0.381222	0.1471	-2.59952	0.093741	0.265281	-0.613268	1.02807
Dusa	P32695	DUSA_ECOLI	tRNA-dihydrouridine synthase A	18.3207	18.916	1.04817	0.438	-0.907524	0.438257	0.624337	-0.59522	0.358271
Dut	P06968	DUT_ECOLI	Deoxyuridine 5'-triphosphate nucleotidohydrolase	19.7464	20.26	0.415405	0.44632	-1.45888	0.21871	0.42122	-0.513562	0.660131
Dxr	P45568	DXR_ECOLI	1-deoxy-D-xylulose 5-phosphate reductoisomerase	17.9646	17.979	0.103219	0.235979	-0.0963677	0.929841	0.961029	-0.0143304	0.0315911
Dxs	P77488	DXS_ECOLI	1-deoxy-D-xylulose-5-phosphate synthase	21.28	20.0683	0.137935	0.450333	4.45609	0.0339096	0.14888	1.21171	1.46968
Ecnb	P0ADB7	ECNB_ECOLI	Entericidin B	18.697	20.9305	0.227084	0.310877	-10.0483	0.000851779	0.0224978	-2.23342	3.06967
Eco	P23827	ECOT_ECOLI	Ecotin	19.3496	19.6559	1.07054	1.44937	-0.294366	0.784319	0.863738	-0.306232	0.105507
Eda	P0A955	ALKH_ECOLI	KHG/KDPG aldolase	23.3118	24.1254	0.263702	0.29603	-3.55462	0.024225	0.124415	-0.813618	1.61574
Edd	P0ADF6	EDD_ECOLI	Phosphogluconate dehydratase	22.0238	23.6392	0.0316522	0.109943	-24.4565	0.000733064	0.0206749	-1.61545	3.13486
Efeb	P31545	EFEB_ECOLI	Deferrochelatase/peroxidase EfeB	20.9062	20.4719	0.262376	0.334144	1.77051	0.15537	0.3489	0.434279	0.808634
Efeo	P0AB24	EFEO_ECOLI	Iron uptake system component EfeO	24.5967	25.8888	0.460764	0.359584	-3.82901	0.0207157	0.111591	-1.29207	1.6837
Efeu	P75901	EFEU_ECOLI	Putative inactive ferrous iron permease EfeU	20.3286	21.8536	0.293335	0.130987	-8.22216	0.00504747	0.0526678	-1.52501	2.29693
Efp	P0A6N4	EFP_ECOLI	Elongation factor P	22.4737	22.5894	0.363663	0.467416	-0.338398	0.753053	0.839357	-0.115705	0.123174
Elaa	P0AEH3	ELAA_ECOLI	Protein ElaA	13.1177	13.7801	0.308389	1.33429	-0.837795	0.482881	0.660183	-0.662411	0.31616
Elab	P0AEH5	ELAB_ECOLI	Protein ElaB	19.2274	19.5259	0.0558937	0.264088	-1.91542	0.184972	0.385224	-0.298516	0.732893
Elbb	P0ABU5	ELBB_ECOLI	Enhancing lycopene biosynthesis protein 2	21.7864	21.8598	0.312021	0.34245	-0.274656	0.797294	0.870536	-0.0734637	0.0983817
Emra	P27303	EMRA_ECOLI	Multidrug export protein EmrA	21.3421	21.0103	0.275076	0.313263	1.3785	0.241242	0.443076	0.331797	0.617547
Engb	P0A6P7	ENGB_ECOLI	Probable GTP-binding protein EngB	21.9287	21.6346	0.311833	0.127035	1.51284	0.239183	0.441374	0.2941	0.62127
Eno	P0A6P9	ENO_ECOLI	Enolase	26.9273	27.076	0.081539	0.0782698	-2.27901	0.0849905	0.252543	-0.148717	1.07063
Enta	P15047	ENTA_ECOLI	2,3-dihydro-2,3-dihydroxybenzoate dehydrogenase	22.666	23.6777	0.209778	0.221819	-5.73938	0.00460948	0.0516186	-1.01167	2.33635
Entb	P0ADI4	ENTB_ECOLI	Isochorismatase	23.7338	25.1548	0.176631	0.0539391	-13.3266	0.0027752	0.0413844	-1.42098	2.55671
Entc	P0AEJ2	ENTC_ECOLI	Isochorismate synthase EntC	20.7933	22.6776	0.725897	0.0943232	-4.45864	0.0440152	0.167218	-1.88431	1.3564
Entd	P19925	ENTD_ECOLI	4'-phosphopantetheinyl transferase EntD	19.1301	21.8543	1.47447	0.151455	-3.18333	0.083826	0.251335	-2.72418	1.07662
Ente	P10378	ENTE_ECOLI	Enterobactin synthase component E	22.7377	23.3623	0.179608	0.291002	-3.16404	0.0439108	0.167203	-0.624689	1.35743
Entf	P11454	ENTF_ECOLI	Enterobactin synthase component F	24.1724	25.3897	0.069009	0.117221	-15.5013	0.000378563	0.0139984	-1.21739	3.42186
Enth	P0A8Y8	ENTH_ECOLI	Proofreading thioesterase EntH	20.3379	21.7067	0.172004	0.615654	-3.7089	0.0523779	0.187496	-1.36881	1.28085
Epd	P0A9B6	E4PD_ECOLI	D-erythrose-4-phosphate dehydrogenase	21.2392	19.4887	0.0784261	0.719828	4.18706	0.0504827	0.183413	1.75041	1.29686
Epta	P30845	EPTA_ECOLI	Phosphoethanolamine transferase EptA	22.0659	21.6198	0.292927	0.446719	1.4464	0.232353	0.435401	0.446094	0.633851
Eptc	P0CB39	EPTC_ECOLI	Phosphoethanolamine transferase EptC	23.9937	24.0655	0.121648	0.169731	-0.595487	0.586678	0.721241	-0.071794	0.2316
Era	P06616	ERA_ECOLI	GTPase Era	19.1758	19.2365	0.304894	0.21522	-0.281697	0.793628	0.868356	-0.0606968	0.100383
Erpa	P0ACC3	ERPA_ECOLI	Iron-sulfur cluster insertion protein ErpA	20.0896	19.3327	1.18104	0.848558	0.901517	0.423095	0.614942	0.756934	0.373562
Evgs	P30855	EVGS_ECOLI	Sensor protein EvgS	15.4659	16.6261	1.62024	1.80888	-0.827478	0.454999	0.636205	-1.16016	0.34199
Exbb	P0ABU7	EXBB_ECOLI	Biopolymer transport protein ExbB	21.3295	21.636	0.0579223	0.0691083	-5.88752	0.00457045	0.0516186	-0.306508	2.34004
Exbd	P0ABV2	EXBD_ECOLI	Biopolymer transport protein ExbD	20.3213	18.8308	1.06111	1.19194	1.61772	0.181983	0.385224	1.49049	0.73997
Exox	P0AEK0	EXOX_ECOLI	Exodeoxyribonuclease 10	18.7437	16.8632	1.12562	3.25528	0.945633	0.427332	0.618869	1.88051	0.369235
Faba	P0A6Q3	FABA_ECOLI	3-hydroxydecanoyl-[acyl-carrier-protein] dehydratase	22.342	22.0454	0.2371	0.310081	1.31637	0.262868	0.471858	0.296662	0.580263
Fabb	P0A953	FABB_ECOLI	3-oxoacyl-[acyl-carrier-protein] synthase 1	24.0147	24.8408	0.131631	0.0432603	-10.3279	0.00460053	0.0516186	-0.826189	2.33719
Fabd	P0AAI9	FABD_ECOLI	Malonyl CoA-acyl carrier protein transacylase	23.2635	23.0451	0.393043	0.668722	0.487511	0.657046	0.774103	0.218325	0.182404
Fabf	P0AAI5	FABF_ECOLI	3-oxoacyl-[acyl-carrier-protein] synthase 2	24.6986	24.7028	0.118534	0.0838628	-0.0500247	0.962752	0.978034	-0.00419365	0.0164855
Fabg	P0AEK2	FABG_ECOLI	3-oxoacyl-[acyl-carrier-protein] reductase FabG	24.3948	23.9747	0.268334	0.0562309	2.65395	0.107657	0.286626	0.420089	0.967958
Fabh	P0A6R0	FABH_ECOLI	3-oxoacyl-[acyl-carrier-protein] synthase 3	23.0707	23.0488	0.0701136	0.0985871	0.313536	0.771137	0.854309	0.0218992	0.112869
Fabi	P0AEK4	FABI_ECOLI	Enoyl-[acyl-carrier-protein] reductase [NADH] FabI	24.9575	24.8276	0.0906678	0.170421	1.16514	0.326982	0.532906	0.129856	0.485477
Fabr	P0ACU5	FABR_ECOLI	HTH-type transcriptional repressor FabR	19.8193	20.5722	0.0273068	0.158172	-8.12452	0.0124677	0.0850256	-0.752912	1.90421
Fabz	P0A6Q6	FABZ_ECOLI	3-hydroxyacyl-[acyl-carrier-protein] dehydratase FabZ	22.2913	22.0123	0.319453	0.114058	1.42432	0.266343	0.475022	0.278938	0.574558
Fadr	P0A8V6	FADR_ECOLI	Fatty acid metabolism regulator protein	19.0724	19.4394	0.0979324	0.372359	-1.65102	0.225328	0.428923	-0.36701	0.647186
Fbaa	P0AB71	ALF_ECOLI	Fructose-bisphosphate aldolase class 2	25.6795	25.2556	0.168504	0.320583	2.02737	0.134881	0.328131	0.423921	0.87005
Fbab	P0A991	ALF1_ECOLI	Fructose-bisphosphate aldolase class 1	21.3124	22.3353	0.277936	0.0603477	-6.22943	0.0198394	0.109808	-1.02291	1.70247
Fbp	P0A993	F16PA_ECOLI	Fructose-1,6-bisphosphatase class 1	22.208	22.2752	0.0946012	0.0766998	-0.955069	0.395773	0.59761	-0.0671549	0.402554
Fdhe	P13024	FDHE_ECOLI	Protein FdhE	19.8841	19.3209	0.185735	0.869433	1.0973	0.378734	0.586718	0.56324	0.421666
Fdx	P0A9R4	FER_ECOLI	2Fe-2S ferredoxin	16.7933	16.7856	3.46183	3.19007	0.00284034	0.997871	0.998291	0.00771973	0.000925768
Feca	P13036	FECA_ECOLI	Fe(3+) dicitrate transport protein FecA	19.2824	21.7851	2.80469	0.103279	-1.5445	0.262144	0.471067	-2.5027	0.58146
Fecb	P15028	FECB_ECOLI	Fe(3+) dicitrate-binding periplasmic protein	13.1177	15.0368	0.308389	1.68798	-1.93721	0.184305	0.385224	-1.91917	0.734462
Fecr	P23485	FECR_ECOLI	Protein FecR	14.1177	18.8754	0.308389	0.792034	-9.69531	0.00417396	0.0496105	-4.75769	2.37945
Feoa	P0AEL3	FEOA_ECOLI	Ferrous iron transport protein A	20.3206	18.1874	0.520393	2.07335	1.72842	0.211899	0.413364	2.13318	0.673872
Feob	P33650	FEOB_ECOLI	Ferrous iron transport protein B	22.3074	21.7975	0.165171	0.318659	2.46053	0.0907594	0.259936	0.50988	1.04211
Fepa	P05825	FEPA_ECOLI	Ferrienterobactin receptor	25.075	26.8285	0.445914	0.173525	-6.34714	0.0120877	0.0834602	-1.75343	1.91766
Fepb	P0AEL6	FEPB_ECOLI	Ferrienterobactin-binding periplasmic protein	23.7895	24.2556	0.0633963	0.183966	-4.14958	0.0367806	0.157234	-0.466175	1.43438
Fepc	P23878	FEPC_ECOLI	Ferric enterobactin transport ATP-binding protein FepC	13.1177	12.9971	0.308389	0.0992598	0.644587	0.5752	0.714278	0.120566	0.240181
Fes	P13039	FES_ECOLI	Enterochelin esterase	19.658	22.0663	0.203969	0.0308644	-20.221	0.00196636	0.035183	-2.40836	2.70634
Ffh	P0AGD7	SRP54_ECOLI	Signal recognition particle protein	23.9786	23.9102	1.2802	0.0486869	0.0925004	0.93471	0.964641	0.0684188	0.029323
Fhua	P06971	FHUA_ECOLI	Ferrichrome-iron receptor	22.5572	24.4547	0.856665	0.292104	-3.63112	0.049606	0.181416	-1.89747	1.30447
Fhuc	P07821	FHUC_ECOLI	Iron(3+)-hydroxamate import ATP-binding protein FhuC	20.6663	21.1618	1.09622	0.0281577	-0.782707	0.515667	0.683403	-0.49554	0.287631
Fhud	P07822	FHUD_ECOLI	Iron(3+)-hydroxamate-binding protein FhuD	15.9843	17.8484	2.70613	0.445347	-1.17723	0.354899	0.559765	-1.86402	0.449895
Fhue	P16869	FHUE_ECOLI	FhuE receptor	21.3869	24.3534	0.836615	0.270854	-5.84292	0.0177798	0.106338	-2.96647	1.75007
Fhuf	P39405	FHUF_ECOLI	Ferric iron reductase protein FhuF	14.1177	13.9971	0.308389	0.0992598	0.644587	0.5752	0.714278	0.120566	0.240181
Fic	P20605	FIC_ECOLI	Probable adenosine monophosphate-protein transferase fic	15.9714	19.269	1.43797	0.572033	-3.69072	0.0432677	0.166276	-3.29763	1.36384
Fief	P69380	FIEF_ECOLI	Ferrous-iron efflux pump FieF	15.1743	17.3203	3.85899	3.82136	-0.684418	0.531311	0.694021	-2.14601	0.274651
Fiu	P75780	FIU_ECOLI	Catecholate siderophore receptor Fiu	14.7029	19.0909	1.31236	0.112066	-5.77028	0.0278033	0.133596	-4.38799	1.5559
Fklb	P0A9L3	FKBB_ECOLI	FKBP-type 22 kDa peptidyl-prolyl cis-trans isomerase	23.3421	22.8463	0.350479	0.404515	1.60435	0.18534	0.385508	0.495765	0.73203
Fkpa	P45523	FKBA_ECOLI	FKBP-type peptidyl-prolyl cis-trans isomerase FkpA	24.5311	24.365	0.389409	0.274555	0.603618	0.582099	0.718556	0.166048	0.235003
Fkpb	P0AEM0	FKBX_ECOLI	FKBP-type 16 kDa peptidyl-prolyl cis-trans isomerase	18.3302	18.8035	1.67468	0.46901	-0.471403	0.678156	0.7897	-0.473327	0.168671
Flda	P61949	FLAV_ECOLI	Flavodoxin-1	20.2727	22.1788	1.2996	0.933214	-2.06342	0.115142	0.298518	-1.90605	0.938767
Fldb	P0ABY4	FLAW_ECOLI	Flavodoxin-2	15.7313	17.8454	2.73907	1.55656	-1.16228	0.325104	0.530366	-2.11409	0.487977
Flgh	P0A6S0	FLGH_ECOLI	Flagellar L-ring protein	23.6684	23.9134	0.497434	0.174556	-0.805052	0.490596	0.666954	-0.245028	0.309276
Flha	P76298	FLHA_ECOLI	Flagellar biosynthesis protein FlhA	17.3222	20.4736	1.48968	0.395696	-3.5414	0.0586891	0.201774	-3.15146	1.23144
Fmt	P23882	FMT_ECOLI	Methionyl-tRNA formyltransferase	20.9308	20.8194	0.256383	0.199426	0.594372	0.586073	0.721241	0.111463	0.232049
Fola	P0ABQ4	DYR_ECOLI	Dihydrofolate reductase	18.9342	18.3762	0.264439	0.909291	1.02067	0.401287	0.601569	0.55803	0.396545
Folc	P08192	FOLC_ECOLI	Bifunctional protein FolC	22.0016	21.379	0.195412	0.305952	2.97075	0.0504626	0.183413	0.622659	1.29703
Fold	P24186	FOLD_ECOLI	Bifunctional protein FolD	23.1223	22.9843	0.112446	0.157159	1.23706	0.290202	0.497831	0.138018	0.537299
Fole	P0A6T5	GCH1_ECOLI	GTP cyclohydrolase 1	24.9532	25.3735	0.129399	0.326669	-2.07215	0.14335	0.335964	-0.420356	0.843603
Folm	P0AFS3	FOLM_ECOLI	Dihydrofolate reductase FolM	14.3134	14.8036	0.640763	1.49295	-0.522641	0.640873	0.76393	-0.490231	0.193228
Folp	P0AC13	DHPS_ECOLI	Dihydropteroate synthase	20.6309	20.7471	0.439774	0.133235	-0.438041	0.698195	0.802995	-0.116212	0.156023
Folx	P0AC19	FOLX_ECOLI	D-erythro-7,8-dihydroneopterin triphosphate epimerase	22.1097	21.9017	0.151747	0.120997	1.85701	0.140411	0.333417	0.208082	0.852599
Fpr	P28861	FENR_ECOLI	Ferredoxin--NADP reductase	20.1453	23.3071	0.476529	0.131215	-11.08	0.00479095	0.0521055	-3.16183	2.31958
Frda	P00363	FRDA_ECOLI	Fumarate reductase flavoprotein subunit	18.1409	15.8341	0.303095	0.814953	4.59526	0.0275135	0.133596	2.30682	1.56045
Frdb	P0AC47	FRDB_ECOLI	Fumarate reductase iron-sulfur subunit	20.1818	16.0216	0.419172	3.60236	1.98686	0.181934	0.385224	4.16019	0.740085
Fre	P0AEN1	FRE_ECOLI	NAD(P)H-flavin reductase	22.2651	22.1243	0.0619331	0.378484	0.63577	0.587063	0.721241	0.140775	0.231316
Frma	P25437	FRMA_ECOLI	S-(hydroxymethyl)glutathione dehydrogenase	21.6201	21.5249	0.481324	0.38313	0.268057	0.802543	0.872583	0.0952089	0.0955317
Frmb	P51025	SFGH1_ECOLI	S-formylglutathione hydrolase FrmB	16.1715	16.6759	1.5087	0.621552	-0.535358	0.633884	0.758138	-0.504346	0.19799
Frmr	P0AAP3	FRMR_ECOLI	Transcriptional repressor FrmR	18.3963	18.084	0.370326	0.551609	0.81403	0.467381	0.646181	0.31225	0.330329
Frr	P0A805	RRF_ECOLI	Ribosome-recycling factor	23.4473	23.8497	0.536847	0.332242	-1.10397	0.342805	0.547435	-0.402402	0.464953
Frsa	P04335	FRSA_ECOLI	Esterase FrsA	21.742	22.2076	0.232929	0.263024	-2.29506	0.0843588	0.251335	-0.465541	1.07387
Frua	P20966	PTFBC_ECOLI	PTS system fructose-specific EIIBC component	20.0484	19.1	0.00964144	0.269936	6.08137	0.0258321	0.12793	0.948371	1.58784
Frub	P69811	PTFAH_ECOLI	Multiphosphoryl transfer protein	21.2789	19.0839	0.0357712	1.27727	2.97534	0.0966505	0.270297	2.19497	1.0148
Fruk	P0AEW9	K1PF_ECOLI	1-phosphofructokinase	20.5703	18.1777	0.144516	2.80609	1.47491	0.277574	0.485449	2.39266	0.556621
Frvr	P32152	FRVR_ECOLI	Putative frv operon regulatory protein	14.1177	17.5239	0.308389	3.14072	-1.8695	0.200079	0.404535	-3.40625	0.698798
Fsab	P32669	FSAB_ECOLI	Fructose-6-phosphate aldolase 2	14.8585	16.8052	3.3121	3.22261	-0.729656	0.50606	0.678007	-1.94675	0.295798
Ftna	P0A998	FTNA_ECOLI	Ferritin-1	22.7282	20.0281	0.570596	1.16874	3.59584	0.0389101	0.161866	2.70011	1.40994
Ftsa	P0ABH0	FTSA_ECOLI	Cell division protein FtsA	21.9986	21.9979	0.286535	0.193212	0.00321096	0.997612	0.998291	0.000640674	0.00103826
Ftse	P0A9R7	FTSE_ECOLI	Cell division ATP-binding protein FtsE	19.6149	20.2074	0.19538	0.284274	-2.97476	0.0476887	0.17713	-0.592431	1.32158
Ftsh	P0AAI3	FTSH_ECOLI	ATP-dependent zinc metalloprotease FtsH	24.6535	25.1394	0.118463	0.17264	-4.0193	0.0201553	0.110608	-0.485865	1.69561
Ftsk	P46889	FTSK_ECOLI	DNA translocase FtsK	19.5406	19.9059	0.593548	0.17437	-1.02295	0.400166	0.60043	-0.365362	0.39776
Ftsn	P29131	FTSN_ECOLI	Cell division protein FtsN	19.3256	18.6744	0.66738	0.479233	1.37272	0.248538	0.452586	0.651167	0.604607
Ftsp	P26648	FTSP_ECOLI	Cell division protein FtsP	17.4336	16.1927	0.116896	0.478889	4.36018	0.0397025	0.163589	1.24093	1.40118
Ftsw	P0ABG4	FTSW_ECOLI	Lipid II flippase FtsW	16.0069	17.5996	0.406539	0.534261	-4.10911	0.0169485	0.104453	-1.59271	1.77087
Ftsx	P0AC30	FTSX_ECOLI	Cell division protein FtsX	18.6992	19.8575	0.875412	0.167667	-2.25082	0.144563	0.33662	-1.15829	0.839944
Ftsy	P10121	FTSY_ECOLI	Signal recognition particle receptor FtsY	22.7559	22.872	0.180468	0.141104	-0.877542	0.43242	0.622665	-0.116065	0.364094
Ftsz	P0A9A6	FTSZ_ECOLI	Cell division protein FtsZ	23.8461	25.1629	0.0487487	0.00704162	-46.3044	0.000357788	0.0139068	-1.31677	3.44637
Fuci	P69922	FUCI_ECOLI	L-fucose isomerase	20.4549	16.1339	0.0788416	1.38943	5.37782	0.0324266	0.145412	4.32097	1.4891
Fucu	P0AEN8	FUCM_ECOLI	L-fucose mutarotase	20.5228	20.9893	0.694937	0.452244	-0.974573	0.393277	0.596004	-0.466528	0.405302
Fuma	P0AC33	FUMA_ECOLI	Fumarate hydratase class I, aerobic	23.6009	21.7248	0.0631629	0.100829	27.3123	4.5928e-05	0.00396219	1.87615	4.33792
Fumc	P05042	FUMC_ECOLI	Fumarate hydratase class II	21.8928	24.3389	0.593227	0.0656937	-7.09868	0.0180554	0.106338	-2.44616	1.74339
Fur	P0A9A9	FUR_ECOLI	Ferric uptake regulation protein	21.9424	22.1293	0.348757	0.195408	-0.809605	0.474951	0.653696	-0.186863	0.323352
Fusa	P0A6M8	EFG_ECOLI	Elongation factor G	27.2539	27.07	0.0493494	0.237806	1.31109	0.311258	0.518661	0.183845	0.50688
Gabd	P25526	GABD_ECOLI	Succinate-semialdehyde dehydrogenase [NADP(+)] GabD	20.7582	22.1274	0.31288	0.116887	-7.10077	0.00964819	0.0719937	-1.36928	2.01555
Gabt	P22256	GABT_ECOLI	4-aminobutyrate aminotransferase GabT	20.7587	22.0065	0.330042	0.264626	-5.10891	0.00784776	0.0649685	-1.24778	2.10525
Galf	P0AAB6	GALF_ECOLI	UTP--glucose-1-phosphate uridylyltransferase	22.2307	22.9717	0.773054	0.336601	-1.52213	0.233938	0.436895	-0.740967	0.630899
Galu	P0AEP3	GALU_ECOLI	UTP--glucose-1-phosphate uridylyltransferase	23.2828	23.3234	0.0889663	0.16009	-0.383616	0.725862	0.819427	-0.0405643	0.139146
Gapa	P0A9B2	G3P1_ECOLI	Glyceraldehyde-3-phosphate dehydrogenase A	27.5515	27.477	0.101097	0.0151766	1.26329	0.329115	0.535424	0.0745621	0.482652
Garr	P0ABQ2	GARR_ECOLI	2-hydroxy-3-oxopropionate reductase	20.4948	19.7448	0.0667583	1.27401	1.01832	0.415164	0.611357	0.750052	0.38178
Gata	P69828	PTKA_ECOLI	Galactitol-specific phosphotransferase enzyme IIA component	22.9075	20.0652	0.084645	0.749055	6.53063	0.02125	0.112971	2.84226	1.67264
Gatb	P37188	PTKB_ECOLI	Galactitol-specific phosphotransferase enzyme IIB component	20.4643	17.4426	0.104966	0.112879	33.9542	4.72415e-06	0.000714635	3.02169	5.32568
Gatc	P69831	PTKC_ECOLI	Galactitol permease IIC component	20.1704	19.3392	0.0420614	0.248641	5.70899	0.025811	0.12793	0.831186	1.58819
Gatd	P0A9S3	GATD_ECOLI	Galactitol-1-phosphate 5-dehydrogenase	22.0181	19.0314	0.186621	0.296694	14.7594	0.000352948	0.0139068	2.98678	3.45229
Gatz	P0C8J8	GATZ_ECOLI	D-tagatose-1,6-bisphosphate aldolase subunit GatZ	25.7715	23.7	0.127656	0.0323098	27.2478	0.000689751	0.0197887	2.07154	3.16131
Gcd	P15877	DHG_ECOLI	Quinoprotein glucose dehydrogenase	22.2344	25.0851	0.216201	0.332176	-12.458	0.000557066	0.0178261	-2.85072	3.25409
Gcva	P0A9F6	GCVA_ECOLI	Glycine cleavage system transcriptional activator	16.9153	17.2865	0.665222	0.450536	-0.800174	0.474165	0.653154	-0.37117	0.324071
Gcvh	P0A6T9	GCSH_ECOLI	Glycine cleavage system H protein	13.1177	16.7565	0.308389	3.15996	-1.98509	0.18316	0.385224	-3.63881	0.737169
Gcvp	P33195	GCSP_ECOLI	Glycine dehydrogenase (decarboxylating)	24.231	24.3459	0.081214	0.0296556	-2.3009	0.121398	0.311259	-0.114854	0.915787
Gcvr	P0A9I3	GCVR_ECOLI	Glycine cleavage system transcriptional repressor	21.4883	21.9417	0.208675	0.269907	-2.30225	0.0869247	0.253315	-0.453481	1.06086
Gcvt	P27248	GCST_ECOLI	Aminomethyltransferase	22.572	22.7741	0.210139	0.198995	-1.20995	0.293092	0.500465	-0.202171	0.532995
Gdha	P00370	DHE4_ECOLI	NADP-specific glutamate dehydrogenase	24.5078	24.6596	0.110582	0.172893	-1.28159	0.28036	0.489014	-0.151857	0.552283
Ghra	P75913	GHRA_ECOLI	Glyoxylate/hydroxypyruvate reductase A	23.5077	23.5451	0.0946931	0.0826614	-0.51494	0.634212	0.758138	-0.0373697	0.197766
Ghrb	P37666	GHRB_ECOLI	Glyoxylate/hydroxypyruvate reductase B	23.053	23.4693	0.0881004	0.164074	-3.87202	0.0293409	0.137919	-0.41632	1.53253
Glcb	P37330	MASZ_ECOLI	Malate synthase G	21.5704	21.6108	0.0897726	0.294036	-0.227351	0.838298	0.89706	-0.0403544	0.0766016
Glda	P0A9S5	GLDA_ECOLI	Glycerol dehydrogenase	19.2467	19.9167	0.707511	1.33551	-0.767894	0.497773	0.670683	-0.670045	0.302969
Glga	P0A6U8	GLGA_ECOLI	Glycogen synthase	21.8742	22.2258	0.33167	0.0840886	-1.77996	0.202542	0.40729	-0.351628	0.693485
Glgb	P07762	GLGB_ECOLI	1,4-alpha-glucan branching enzyme GlgB	19.7052	19.5124	0.528313	0.700115	0.380662	0.724183	0.818086	0.192762	0.140152
Glgc	P0A6V1	GLGC_ECOLI	Glucose-1-phosphate adenylyltransferase	22.3683	21.9249	0.152107	0.323201	2.15	0.125622	0.320399	0.443399	0.900936
Glgp	P0AC86	PHSG_ECOLI	Glycogen phosphorylase	22.5135	22.6888	0.195378	0.120459	-1.32309	0.269359	0.476425	-0.175333	0.569669
Glgx	P15067	GLGX_ECOLI	Glycogen debranching enzyme	15.5551	15.5678	4.5184	4.42834	-0.00348158	0.997389	0.998291	-0.0127171	0.00113548
Glk	P0A6V8	GLK_ECOLI	Glucokinase	22.4598	22.2008	0.231471	0.195842	1.47931	0.21504	0.417534	0.25896	0.667481
Glmm	P31120	GLMM_ECOLI	Phosphoglucosamine mutase	23.6268	23.722	0.0495697	0.0828001	-1.70906	0.178361	0.384446	-0.0952229	0.7487
Glms	P17169	GLMS_ECOLI	Glutamine--fructose-6-phosphate aminotransferase [isomerizing]	24.6385	24.036	0.0771583	0.049284	11.3986	0.000794252	0.0213167	0.602519	3.10004
Glmu	P0ACC7	GLMU_ECOLI	Bifunctional protein GlmU	21.6751	21.378	0.499734	0.389093	0.812528	0.464634	0.644754	0.297111	0.332889
Glna	P0A9C5	GLNA_ECOLI	Glutamine synthetase	26.6091	24.7778	0.142505	0.181319	13.7537	0.000225825	0.0124167	1.83126	3.64623
Glnb	P0A9Z1	GLNB_ECOLI	Nitrogen regulatory protein P-II 1	21.2269	21.3921	0.328047	0.408715	-0.546004	0.615369	0.74201	-0.165209	0.210864
Glnd	P27249	GLND_ECOLI	Bifunctional uridylyltransferase/uridylyl-removing enzyme	20.9468	21.7478	0.276726	0.16754	-4.28898	0.0192626	0.108831	-0.801044	1.71528
Glne	P30870	GLNE_ECOLI	Glutamate-ammonia-ligase adenylyltransferase	21.3334	22.2449	0.461032	0.0665554	-3.38939	0.0728445	0.229571	-0.911531	1.1376
Glng	P0AFB8	NTRC_ECOLI	Nitrogen regulation protein NR(I)	22.5181	20.0959	0.110784	1.09484	3.8126	0.0604559	0.204469	2.42228	1.21856
Glnh	P0AEQ3	GLNH_ECOLI	Glutamine-binding periplasmic protein	24.7551	23.7424	0.357187	0.297517	3.77327	0.0207221	0.111591	1.01271	1.68357
Glnk	P0AC55	GLNK_ECOLI	Nitrogen regulatory protein P-II 2	24.0347	17.7926	0.44778	1.38658	7.41996	0.0102522	0.0750023	6.24206	1.98918
Glnl	P0AFB5	NTRB_ECOLI	Nitrogen regulation protein NR(II)	21.2016	20.6117	0.149413	1.38797	0.731997	0.538822	0.695578	0.589971	0.268554
Glnp	P0AEQ6	GLNP_ECOLI	Glutamine transport system permease protein GlnP	20.2774	19.2868	0.111152	0.277639	5.73703	0.0149985	0.0941795	0.990576	1.82395
Glnq	P10346	GLNQ_ECOLI	Glutamine transport ATP-binding protein GlnQ	22.4605	21.8498	0.0159166	0.147848	7.11273	0.0180489	0.106338	0.610651	1.74355
Glns	P00962	SYQ_ECOLI	Glutamine--tRNA ligase	24.3196	24.4179	0.0578084	0.0963693	-1.51446	0.219673	0.422096	-0.0982604	0.658224
Gloa	P0AC81	LGUL_ECOLI	Lactoylglutathione lyase	20.693	21.4672	0.429667	0.176626	-2.88667	0.0730638	0.229827	-0.774235	1.1363
Glob	P0AC84	GLO2_ECOLI	Hydroxyacylglutathione hydrolase	20.8076	20.578	0.0237454	0.17494	2.25235	0.148587	0.341393	0.229577	0.828018
Glpa	P0A9C0	GLPA_ECOLI	Anaerobic glycerol-3-phosphate dehydrogenase subunit A	17.35	15.9097	0.365483	1.72858	1.4119	0.283885	0.491829	1.44022	0.546857
Glpb	P13033	GLPB_ECOLI	Anaerobic glycerol-3-phosphate dehydrogenase subunit B	14.5061	12.9971	2.70212	0.0992598	0.966646	0.435468	0.622665	1.50905	0.361043
Glpd	P13035	GLPD_ECOLI	Aerobic glycerol-3-phosphate dehydrogenase	18.7986	19.313	0.162828	0.246668	-3.01419	0.0473904	0.176415	-0.514353	1.32431
Glpe	P0A6V5	GLPE_ECOLI	Thiosulfate sulfurtransferase GlpE	13.1177	12.9971	0.308389	0.0992598	0.644587	0.5752	0.714278	0.120566	0.240181
Glpk	P0A6F3	GLPK_ECOLI	Glycerol kinase	22.8848	23.4271	0.129312	0.0471608	-6.82392	0.0109451	0.0778321	-0.542287	1.96078
Glpq	P09394	GLPQ_ECOLI	Glycerophosphoryl diester phosphodiesterase	16.0053	12.9971	0.533562	0.0992598	9.60047	0.00855179	0.0678849	3.00819	2.06794
Glpr	P0ACL0	GLPR_ECOLI	Glycerol-3-phosphate regulon repressor	19.5105	20.8413	0.360877	0.0330102	-6.36053	0.022876	0.119703	-1.33076	1.64062
Glpx	P0A9C9	GLPX_ECOLI	Fructose-1,6-bisphosphatase 1 class 2	19.1443	18.6613	0.105781	0.780536	1.06199	0.39614	0.597623	0.482953	0.402151
Glrr	P0AFU4	GLRR_ECOLI	Transcriptional regulatory protein GlrR	22.9288	23.09	0.199073	0.253997	-0.865445	0.438208	0.624337	-0.161249	0.35832
Glsa1	P77454	GLSA1_ECOLI	Glutaminase 1	16.4746	14.4387	2.61533	2.4735	0.979579	0.382918	0.586718	2.03587	0.416894
Glta	P0ABH7	CISY_ECOLI	Citrate synthase	26.0316	25.3934	0.050659	0.0215855	20.0733	0.000508366	0.0172637	0.638177	3.29382
Gltb	P09831	GLTB_ECOLI	Glutamate synthase [NADPH] large chain	26.9788	25.178	0.0790615	0.274819	10.9071	0.00474563	0.0521055	1.80078	2.32371
Gltd	P09832	GLTD_ECOLI	Glutamate synthase [NADPH] small chain	25.0529	22.5553	0.0215855	0.228228	18.8708	0.00257704	0.0397056	2.49766	2.58888
Glti	P37902	GLTI_ECOLI	Glutamate/aspartate periplasmic-binding protein	25.3468	24.1737	0.363786	0.304654	4.28226	0.0136901	0.0889857	1.17315	1.86359
Gltj	P0AER3	GLTJ_ECOLI	Glutamate/aspartate transport system permease protein GltJ	18.2815	15.0842	0.652564	1.97881	2.65783	0.0955909	0.268639	3.19733	1.01958
Gltk	P0AER5	GLTK_ECOLI	Glutamate/aspartate transport system permease protein GltK	16.7474	17.2291	3.38939	0.314347	-0.245128	0.828872	0.890984	-0.481742	0.0815127
Glts	P0AER8	GLTS_ECOLI	Sodium/glutamate symport carrier protein	20.4217	21.4081	0.320646	0.428604	-3.19179	0.0369461	0.157234	-0.986388	1.43243
Gltx	P04805	SYE_ECOLI	Glutamate--tRNA ligase	23.866	23.5512	0.11789	0.141097	2.96502	0.0429917	0.166276	0.314751	1.36662
Glya	P0A825	GLYA_ECOLI	Serine hydroxymethyltransferase	26.393	26.3774	0.156585	0.2023	0.105466	0.921386	0.955852	0.0155771	0.0355584
Glyq	P00960	SYGA_ECOLI	Glycine--tRNA ligase alpha subunit	23.1609	23.1321	0.0291296	0.147027	0.332744	0.768915	0.852415	0.0287944	0.114122
Glys	P00961	SYGB_ECOLI	Glycine--tRNA ligase beta subunit	24.9375	25.1468	0.103696	0.135295	-2.12584	0.105331	0.284585	-0.209219	0.977443
Gmha	P63224	GMHA_ECOLI	Phosphoheptose isomerase	22.9813	23.2916	0.147492	0.269014	-1.75221	0.174983	0.381115	-0.310365	0.757003
Gmhb	P63228	GMHBB_ECOLI	D-glycero-beta-D-manno-heptose-1,7-bisphosphate 7-phosphatase	19.7426	19.9495	0.362343	0.47857	-0.59704	0.584856	0.720928	-0.206913	0.232951
Gmk	P60546	KGUA_ECOLI	Guanylate kinase	19.9614	20.5806	0.281815	0.493768	-1.8864	0.150533	0.343755	-0.619195	0.822368
Gnd	P00350	6PGD_ECOLI	6-phosphogluconate dehydrogenase, decarboxylating	25.9575	25.9346	0.047118	0.0206437	0.772441	0.500954	0.67405	0.0229415	0.300202
Gnsa	P0AC92	GNSA_ECOLI	Protein GnsA	15.853	16.0863	2.08334	2.58348	-0.121753	0.909217	0.947955	-0.233294	0.0413327
Gntk	P46859	GNTK_ECOLI	Thermoresistant gluconokinase	20.9512	21.3006	0.322096	0.416108	-1.15025	0.317843	0.523128	-0.349451	0.497788
Gntr	P0ACP5	GNTR_ECOLI	HTH-type transcriptional regulator GntR	16.2649	14.8077	1.66476	1.33533	1.1827	0.30527	0.512743	1.45726	0.515316
Gntt	P39835	GNTT_ECOLI	High-affinity gluconate transporter	21.1475	20.3613	0.264617	0.213432	4.00568	0.0174999	0.106277	0.786226	1.75696
Gor	P06715	GSHR_ECOLI	Glutathione reductase	22.6486	23.0688	0.0820478	0.0276476	-8.4059	0.00728562	0.0634726	-0.420189	2.13753
Gph	P32662	GPH_ECOLI	Phosphoglycolate phosphatase	20.4701	20.2421	0.930209	0.951981	0.296797	0.781402	0.861095	0.228074	0.107125
Gpma	P62707	GPMA_ECOLI	2,3-bisphosphoglycerate-dependent phosphoglycerate mutase	25.2976	26.5234	0.131165	0.249578	-7.5308	0.00470758	0.0521055	-1.22587	2.3272
Gpmb	P0A7A2	GPMB_ECOLI	Probable phosphoglycerate mutase GpmB	21.1869	22.5387	2.70064	2.9685	-0.58341	0.591192	0.723044	-1.35176	0.228272
Gpmi	P37689	GPMI_ECOLI	2,3-bisphosphoglycerate-independent phosphoglycerate mutase	22.8613	22.5371	0.127305	0.0833285	3.69156	0.0271926	0.133084	0.324285	1.56555
Gppa	P25552	GPPA_ECOLI	Guanosine-5'-triphosphate,3'-diphosphate pyrophosphatase	18.4261	19.6441	0.963854	0.0651551	-2.18379	0.159484	0.355853	-1.21801	0.797284
Gpr	Q46851	GPR_ECOLI	L-glyceraldehyde 3-phosphate reductase	19.7781	18.448	0.234897	0.970419	2.30736	0.134092	0.327169	1.33008	0.872597
Gpsa	P0A6S7	GPDA_ECOLI	Glycerol-3-phosphate dehydrogenase [NAD(P)+]	20.6511	21.0365	0.13448	0.22443	-2.55162	0.0769124	0.237444	-0.385437	1.114
Gpt	P0A9M5	XGPT_ECOLI	Xanthine phosphoribosyltransferase	18.0343	19.6837	2.29805	0.0868389	-1.24226	0.33974	0.545144	-1.64938	0.468853
Grca	P68066	GRCA_ECOLI	Autonomous glycyl radical cofactor	15.9246	19.5253	1.1392	1.11669	-3.90954	0.0174138	0.106141	-3.60073	1.75911
Grea	P0A6W5	GREA_ECOLI	Transcription elongation factor GreA	21.6423	21.793	0.732465	0.573789	-0.280538	0.793732	0.868356	-0.150704	0.100326
Grol	P0A6F5	CH60_ECOLI	60 kDa chaperonin	26.9993	27.056	0.0546837	0.084079	-0.979282	0.391266	0.59404	-0.056707	0.407527
Gros	P0A6F9	CH10_ECOLI	10 kDa chaperonin	24.3277	24.4385	0.216902	0.218327	-0.623153	0.566955	0.714278	-0.110723	0.246451
Grpe	P09372	GRPE_ECOLI	Protein GrpE	23.2756	23.9179	0.35143	0.492553	-1.83874	0.147337	0.339569	-0.642343	0.831688
Grxb	P0AC59	GLRX2_ECOLI	Glutaredoxin-2	22.596	23.6498	0.304926	0.24372	-4.67583	0.0106188	0.0768011	-1.05381	1.97392
Grxc	P0AC62	GLRX3_ECOLI	Glutaredoxin-3	21.0348	21.6991	0.9178	0.542339	-1.07934	0.354053	0.55896	-0.664325	0.450932
Grxd	P0AC69	GLRX4_ECOLI	Glutaredoxin-4	22.053	21.654	0.410438	0.343302	1.29172	0.268045	0.476016	0.399054	0.571792
Gsha	P0A6W9	GSH1_ECOLI	Glutamate--cysteine ligase	22.5746	22.7144	0.130295	0.00993915	-1.85328	0.203563	0.4086	-0.139819	0.6913
Gshb	P04425	GSHB_ECOLI	Glutathione synthetase	23.519	23.8436	0.0931581	0.144444	-3.27079	0.038708	0.161429	-0.324575	1.4122
Gsia	P75796	GSIA_ECOLI	Glutathione import ATP-binding protein GsiA	20.6001	21.1888	0.780283	0.197817	-1.26671	0.320285	0.525078	-0.588702	0.494464
Gsib	P75797	GSIB_ECOLI	Glutathione-binding protein GsiB	22.7781	23.7199	0.436156	0.113474	-3.61956	0.0565983	0.19669	-0.941801	1.2472
Gsk	P0AEW6	INGK_ECOLI	Inosine-guanosine kinase	19.3542	18.2922	0.294973	1.1206	1.58732	0.238324	0.441374	1.06195	0.622832
Gss	P0AES0	GSP_ECOLI	Bifunctional glutathionylspermidine synthetase/amidase	22.1256	23.3176	0.152207	0.111446	-10.9438	0.000624503	0.0192439	-1.19194	3.20447
Gsta	P0A9D2	GSTA_ECOLI	Glutathione S-transferase GstA	22.2662	22.9344	0.433703	0.516237	-1.71643	0.163349	0.360972	-0.668157	0.786885
Gstb	P0ACA7	GSTB_ECOLI	Glutathione S-transferase GstB	23.032	24.1975	0.302729	0.313615	-4.63096	0.0098293	0.0730176	-1.16543	2.00748
Guaa	P04079	GUAA_ECOLI	GMP synthase [glutamine-hydrolyzing]	25.1641	25.2445	0.0903314	0.12162	-0.91936	0.413957	0.610118	-0.080413	0.383045
Guab	P0ADG7	IMDH_ECOLI	Inosine-5'-monophosphate dehydrogenase	24.0348	24.4357	0.162254	0.16737	-2.97876	0.0408385	0.164791	-0.400895	1.38893
Guac	P60560	GUAC_ECOLI	GMP reductase	22.3845	21.903	0.0504898	0.100918	7.38945	0.00547506	0.0550978	0.481425	2.26161
Gutq	P17115	GUTQ_ECOLI	Arabinose 5-phosphate isomerase GutQ	17.3699	16.9783	0.986328	2.53039	0.249765	0.82121	0.884588	0.391628	0.0855456
Gyra	P0AES4	GYRA_ECOLI	DNA gyrase subunit A	24.2804	24.1519	0.0889146	0.0531324	2.14932	0.1134	0.296044	0.128534	0.945388
Gyrb	P0AES6	GYRB_ECOLI	DNA gyrase subunit B	24.3258	24.1639	0.140071	0.296736	0.855074	0.458378	0.638811	0.161993	0.338776
Hda	P69931	HDA_ECOLI	DnaA regulatory inactivator Hda	15.2947	18.857	3.55366	0.418329	-1.72435	0.223407	0.426808	-3.56229	0.650902
Hdfr	P0A8R9	HDFR_ECOLI	HTH-type transcriptional regulator HdfR	16.4013	17.667	2.26499	0.769885	-0.916333	0.44035	0.625213	-1.26561	0.356202
Hdha	P0AET8	HDHA_ECOLI	7-alpha-hydroxysteroid dehydrogenase	20.347	20.6702	0.373482	0.20401	-1.31515	0.277388	0.485449	-0.323134	0.556913
Held	P15038	HELD_ECOLI	Helicase IV	13.1177	13.8995	0.308389	0.752769	-1.66475	0.206299	0.410942	-0.78188	0.685502
Hemb	P0ACB2	HEM2_ECOLI	Delta-aminolevulinic acid dehydratase	22.7381	23.166	0.14999	0.150159	-3.49185	0.0250807	0.126467	-0.427876	1.60066
Hemc	P06983	HEM3_ECOLI	Porphobilinogen deaminase	21.3039	21.4457	0.334433	0.331501	-0.521558	0.629526	0.75634	-0.141795	0.200986
Heme	P29680	DCUP_ECOLI	Uroporphyrinogen decarboxylase	21.6155	21.5144	0.640841	0.188796	0.262282	0.814393	0.879396	0.101165	0.0891662
Hemg	P0ACB4	HEMG_ECOLI	Protoporphyrinogen IX dehydrogenase [menaquinone]	18.6593	19.209	0.258417	0.397749	-2.00739	0.126706	0.321218	-0.549725	0.897202
Hemh	P23871	HEMH_ECOLI	Ferrochelatase	13.1177	13.3801	0.308389	0.596977	-0.676408	0.547315	0.701103	-0.262404	0.261762
Heml	P23893	GSA_ECOLI	Glutamate-1-semialdehyde 2,1-aminomutase	24.1128	24.1309	0.060738	0.0749348	-0.325825	0.761553	0.8465	-0.0181454	0.1183
Hemn	P32131	HEMN_ECOLI	Oxygen-independent coproporphyrinogen-III oxidase	18.7784	17.5195	0.307672	0.886327	2.32414	0.121163	0.311135	1.25893	0.91663
Hemx	P09127	HEMX_ECOLI	Putative uroporphyrinogen-III C-methyltransferase	22.6961	22.2803	0.170682	0.0543908	4.02054	0.0414007	0.164791	0.415828	1.38299
Hemy	P0ACB7	HEMY_ECOLI	Protein HemY	21.7529	21.286	0.123937	0.452363	1.72383	0.210355	0.412678	0.466808	0.677046
Hflc	P0ABC3	HFLC_ECOLI	Modulator of FtsH protease HflC	22.7316	22.7032	0.0924811	0.207367	0.216416	0.843632	0.901608	0.0283701	0.0738471
Hfld	P25746	HFLD_ECOLI	High frequency lysogenization protein HflD	19.9751	19.1707	0.0973275	0.984179	1.40889	0.292009	0.499899	0.804458	0.534604
Hflk	P0ABC7	HFLK_ECOLI	Modulator of FtsH protease HflK	23.5312	23.5503	0.0690797	0.0571988	-0.36811	0.732059	0.825302	-0.019061	0.135454
Hflx	P25519	HFLX_ECOLI	GTPase HflX	21.3903	21.6639	0.307702	0.1073	-1.45429	0.259703	0.468197	-0.273615	0.585523
Hfq	P0A6X3	HFQ_ECOLI	RNA-binding protein Hfq	13.1177	16.1873	0.308389	2.6677	-1.97983	0.182949	0.385224	-3.06964	0.737669
Hint	P0ACE7	HINT_ECOLI	HIT-like protein HinT	19.5412	19.7184	0.621189	0.887546	-0.283197	0.792633	0.868356	-0.177129	0.100928
Hisa	P10371	HIS4_ECOLI	1-(5-phosphoribosyl)-5-[(5-phosphoribosylamino)methylideneamino] imidazole-4-carboxamide isomerase	22.6684	22.5865	0.229973	0.456836	0.277279	0.799844	0.871686	0.0818775	0.096995
Hisb	P06987	HIS7_ECOLI	Histidine biosynthesis bifunctional protein HisB	23.6777	23.7699	0.156718	0.117402	-0.815674	0.463838	0.644262	-0.0922155	0.333634
Hisc	P06986	HIS8_ECOLI	Histidinol-phosphate aminotransferase	23.0502	23.5824	0.181652	0.110904	-4.33146	0.0185264	0.106338	-0.532241	1.73221
Hisd	P06988	HISX_ECOLI	Histidinol dehydrogenase	23.5464	23.45	0.0772257	0.319858	0.50728	0.657681	0.774103	0.0963711	0.181985
Hisf	P60664	HIS6_ECOLI	Imidazole glycerol phosphate synthase subunit HisF	22.8885	23.1398	0.334544	0.284484	-0.991311	0.378993	0.586718	-0.251339	0.421369
Hisg	P60757	HIS1_ECOLI	ATP phosphoribosyltransferase	23.9742	24.1441	0.0694379	0.0368779	-3.74285	0.0324378	0.145412	-0.1699	1.48895
Hish	P60595	HIS5_ECOLI	Imidazole glycerol phosphate synthase subunit HisH	21.7222	21.5841	0.472252	0.463548	0.361416	0.736076	0.826507	0.138081	0.133077
Hisi	P06989	HIS2_ECOLI	Histidine biosynthesis bifunctional protein HisIE	21.4265	21.707	0.346883	0.413024	-0.900691	0.420094	0.614482	-0.280478	0.376653
Hisj	P0AEU0	HISJ_ECOLI	Histidine-binding periplasmic protein	23.9224	23.8964	0.355834	0.312071	0.0954584	0.928616	0.960942	0.0260845	0.0321638
Hism	P0AEU3	HISM_ECOLI	Histidine transport system permease protein HisM	19.5781	19.211	0.14317	0.371682	1.59656	0.223027	0.426571	0.367145	0.651643
Hisp	P07109	HISP_ECOLI	Histidine transport ATP-binding protein HisP	19.3198	18.2646	0.373519	0.389839	3.38501	0.0277352	0.133596	1.05515	1.55697
Hisq	P52094	HISQ_ECOLI	Histidine transport system permease protein HisQ	18.74	18.2242	0.225512	0.288632	2.43887	0.0750125	0.234626	0.515758	1.12487
Hiss	P60906	SYH_ECOLI	Histidine--tRNA ligase	24.3929	24.3446	0.0253693	0.0815958	0.978512	0.416451	0.612709	0.0482737	0.380436
Hldd	P67910	HLDD_ECOLI	ADP-L-glycero-D-manno-heptose-6-epimerase	23.5332	23.9277	0.203975	0.143645	-2.73897	0.0584828	0.201481	-0.394512	1.23297
Hlde	P76658	HLDE_ECOLI	Bifunctional protein HldE	23.7427	24.2123	0.151834	0.0399634	-5.18018	0.0267133	0.131902	-0.469568	1.57327
Hmp	P24232	HMP_ECOLI	Flavohemoprotein	17.3911	20.7532	1.85446	0.382454	-3.07547	0.0825851	0.250017	-3.36212	1.0831
Hns	P0ACF8	HNS_ECOLI	DNA-binding protein H-NS	24.1427	24.5534	0.19529	0.367595	-1.70879	0.184652	0.385224	-0.41066	0.733647
Hola	P28630	HOLA_ECOLI	DNA polymerase III subunit delta	13.6455	14.5393	1.21309	1.24008	-0.892473	0.422601	0.614942	-0.89387	0.37407
Holb	P28631	HOLB_ECOLI	DNA polymerase III subunit delta'	18.7255	19.0038	0.676957	0.0529794	-0.709868	0.550615	0.704245	-0.278294	0.259152
Hpf	P0AFX0	HPF_ECOLI	Ribosome hibernation promoting factor	21.3877	22.9629	0.406901	0.418788	-4.67229	0.00952108	0.0719937	-1.57513	2.02131
Hpt	P0A9M2	HPRT_ECOLI	Hypoxanthine phosphoribosyltransferase	22.4569	22.4477	0.162304	0.283756	0.0484011	0.964276	0.978387	0.00913487	0.0157987
Hrpa	P43329	HRPA_ECOLI	ATP-dependent RNA helicase HrpA	18.9676	19.291	0.10071	0.0811904	-4.32986	0.0135952	0.0889519	-0.323383	1.86662
Hsca	P0A6Z1	HSCA_ECOLI	Chaperone protein HscA	20.5341	18.1401	0.140103	0.970913	4.22685	0.0480962	0.178122	2.39393	1.31789
Hscb	P0A6L9	HSCB_ECOLI	Co-chaperone protein HscB	17.0825	19.1384	2.83853	0.375943	-1.24363	0.335991	0.542323	-2.05588	0.473672
Hsdr	P08956	T1RK_ECOLI	Type I restriction enzyme EcoKI R protein	19.7413	16.8294	0.492443	1.38898	3.42239	0.0551074	0.19305	2.91189	1.25879
Hslo	P0A6Y5	HSLO_ECOLI	33 kDa chaperonin	22.2466	22.6127	0.366709	0.392815	-1.17973	0.303765	0.511288	-0.366019	0.517462
Hslr	P0ACG8	HSLR_ECOLI	Heat shock protein 15	14.4826	14.5055	2.31132	2.70858	-0.0111629	0.991641	0.996431	-0.0229485	0.00364571
Hslu	P0A6H5	HSLU_ECOLI	ATP-dependent protease ATPase subunit HslU	24.5778	24.4843	0.0592345	0.0696765	1.76976	0.153336	0.347883	0.0934436	0.814357
Hslv	P0A7B8	HSLV_ECOLI	ATP-dependent protease subunit HslV	20.8663	21.0534	0.0973324	0.467532	-0.678582	0.562479	0.712302	-0.187097	0.249894
Hspq	P0AB20	HSPQ_ECOLI	Heat shock protein HspQ	13.1177	14.8449	0.308389	3.13079	-0.950951	0.440355	0.625213	-1.72722	0.356197
Htpg	P0A6Z3	HTPG_ECOLI	Chaperone protein HtpG	24.6589	24.9898	0.065911	0.144969	-3.59817	0.0413291	0.164791	-0.330824	1.38374
Htpx	P23894	HTPX_ECOLI	Protease HtpX	19.3506	19.5436	0.188654	0.0636192	-1.67976	0.211655	0.413364	-0.193082	0.674371
Htrb	P0ACV0	HTRB_ECOLI	Lipid A biosynthesis lauroyl acyltransferase	18.2533	19.1117	0.775451	0.303965	-1.78516	0.186152	0.386713	-0.858436	0.730132
Hupa	P0ACF0	DBHA_ECOLI	DNA-binding protein HU-alpha	26.1581	26.4041	0.267254	0.30731	-1.04591	0.355695	0.560404	-0.245929	0.448923
Hupb	P0ACF4	DBHB_ECOLI	DNA-binding protein HU-beta	24.7264	25.1869	0.163052	0.182276	-3.26148	0.0315973	0.143903	-0.460514	1.50035
Hybc	P0ACE0	MBHM_ECOLI	Hydrogenase-2 large chain	20.3491	18.197	0.162957	0.863298	4.24276	0.0454237	0.170236	2.15204	1.34272
Hyci	P0AEV9	HYCI_ECOLI	Hydrogenase 3 maturation protease	16.1124	14.3638	2.84336	2.46316	0.805082	0.466761	0.646181	1.74858	0.330906
Hyfg	P77329	HYFG_ECOLI	Hydrogenase-4 component G	19.1703	19.9662	0.0889422	0.141101	-8.26535	0.00236689	0.0378702	-0.795943	2.62582
Iada	P39377	IADA_ECOLI	Isoaspartyl dipeptidase	19.7248	19.2791	0.286747	0.826319	0.882558	0.454744	0.636205	0.445678	0.342233
Ibpa	P0C054	IBPA_ECOLI	Small heat shock protein IbpA	24.1185	24.1054	0.103214	0.268706	0.0787259	0.942953	0.966736	0.0130833	0.0255099
Ibpb	P0C058	IBPB_ECOLI	Small heat shock protein IbpB	23.6657	23.7063	0.0786187	0.296196	-0.229306	0.837588	0.89706	-0.0405712	0.0769696
Icd	P08200	IDH_ECOLI	Isocitrate dehydrogenase [NADP]	27.0981	27.5019	0.0406132	0.0479513	-11.1304	0.00042805	0.0151548	-0.403812	3.36851
Icia	P0A8S1	ICIA_ECOLI	Chromosome initiation inhibitor	21.6982	21.6949	0.0345095	0.0844153	0.0637193	0.953688	0.971793	0.00335498	0.0205935
Iclr	P16528	ICLR_ECOLI	Acetate operon repressor	16.1038	17.4705	0.435605	0.209394	-4.89761	0.0179437	0.106338	-1.36665	1.74609
Ihfa	P0A6X7	IHFA_ECOLI	Integration host factor subunit alpha	23.4555	24.4597	0.195137	0.21696	-5.96008	0.00412112	0.0493349	-1.00411	2.38498
Ihfb	P0A6Y1	IHFB_ECOLI	Integration host factor subunit beta	22.8711	23.5978	0.078798	0.132157	-8.17995	0.00278549	0.0413844	-0.72666	2.5551
Iles	P00956	SYI_ECOLI	Isoleucine--tRNA ligase	24.9441	24.8449	0.0791903	0.148999	1.01772	0.382706	0.586718	0.0991458	0.417135
Ilva	P04968	ILVA_ECOLI	L-threonine dehydratase biosynthetic IlvA	24.5563	24.0942	0.04822	0.169933	4.53108	0.0341655	0.149224	0.4621	1.46641
Ilvb	P08142	ILVB_ECOLI	Acetolactate synthase isozyme 1 large subunit	22.937	22.4317	0.0821331	0.0252421	10.1862	0.00516373	0.0533692	0.505324	2.28704
Ilvc	P05793	ILVC_ECOLI	Ketol-acid reductoisomerase	28.4584	26.5849	0.0477837	0.154965	20.0106	0.00104939	0.0239202	1.87352	2.97907
Ilvd	P05791	ILVD_ECOLI	Dihydroxy-acid dehydratase	25.0443	24.3441	0.0785951	0.103438	9.33599	0.00101324	0.0238688	0.700234	2.99429
Ilve	P0AB80	ILVE_ECOLI	Branched-chain-amino-acid aminotransferase	25.2249	24.7275	0.0165353	0.0473412	17.1793	0.00121344	0.026568	0.49737	2.91598
Ilvg	P00892	ILVG_ECOLI	Acetolactate synthase isozyme 2 large subunit	20.6881	16.9925	0.0828602	1.47911	4.32081	0.0490606	0.179817	3.6956	1.30927
Ilvh	P00894	ILVH_ECOLI	Acetolactate synthase isozyme 3 small subunit	21.9534	21.8616	0.0451664	0.232747	0.670511	0.567334	0.714278	0.0917818	0.246161
Ilvi	P00893	ILVI_ECOLI	Acetolactate synthase isozyme 3 large subunit	24.1113	24.1473	0.142055	0.197616	-0.256559	0.811389	0.877291	-0.0360499	0.090771
Ilvn	P0ADF8	ILVN_ECOLI	Acetolactate synthase isozyme 1 small subunit	20.8131	20.3911	0.523891	0.261207	1.24863	0.302086	0.509809	0.422011	0.519869
Infa	P69222	IF1_ECOLI	Translation initiation factor IF-1	21.7648	21.8382	0.187638	0.187171	-0.479975	0.656312	0.774103	-0.0734435	0.18289
Infb	P0A705	IF2_ECOLI	Translation initiation factor IF-2	25.2386	24.9294	0.0887306	0.134379	3.3257	0.0362346	0.156203	0.309194	1.44088
Infc	P0A707	IF3_ECOLI	Translation initiation factor IF-3	23.8555	23.5737	0.0407812	0.156902	3.01037	0.081315	0.247817	0.281762	1.08983
Irap	P0AAN9	IRAP_ECOLI	Anti-adapter protein IraP	16.9829	16.5087	0.335546	0.448375	1.46682	0.221762	0.424963	0.474271	0.654113
Isca	P0AAC8	ISCA_ECOLI	Iron-binding protein IscA	17.3716	15.5627	0.516406	2.12767	1.43098	0.27631	0.485449	1.80887	0.558604
Iscr	P0AGK8	ISCR_ECOLI	HTH-type transcriptional regulator IscR	17.0675	21.639	2.15112	0.44315	-3.60515	0.0611235	0.206307	-4.57144	1.21379
Iscs	P0A6B7	ISCS_ECOLI	Cysteine desulfurase IscS	23.7419	23.8032	0.0907682	0.117087	-0.717139	0.515241	0.683403	-0.0613398	0.287989
Iscu	P0ACD4	ISCU_ECOLI	Iron-sulfur cluster assembly scaffold protein IscU	20.3775	20.3604	0.318375	0.786225	0.0348933	0.974633	0.985291	0.0170884	0.011159
Iscx	P0C0L9	ISCX_ECOLI	Protein IscX	19.2403	17.5394	1.29533	2.99273	0.903366	0.438987	0.624337	1.70082	0.357548
Ispa	P22939	ISPA_ECOLI	Farnesyl diphosphate synthase	19.1989	18.8615	0.898336	0.322647	0.612184	0.591384	0.723044	0.33737	0.22813
Ispb	P0AD57	ISPB_ECOLI	Octaprenyl-diphosphate synthase	20.1421	20.5864	0.6893	0.277358	-1.03576	0.385984	0.588705	-0.444318	0.413431
Ispe	P62615	ISPE_ECOLI	4-diphosphocytidyl-2-C-methyl-D-erythritol kinase	20.2534	20.253	0.240532	0.162508	0.00229801	0.998291	0.998291	0.000385136	0.000742863
Ispf	P62617	ISPF_ECOLI	2-C-methyl-D-erythritol 2,4-cyclodiphosphate synthase	19.3024	19.4469	0.551735	0.319431	-0.392702	0.719212	0.816907	-0.144546	0.143143
Ispg	P62620	ISPG_ECOLI	4-hydroxy-3-methylbut-2-en-1-yl diphosphate synthase	23.4233	18.8548	0.0823542	1.58193	4.99518	0.0374044	0.158657	4.56842	1.42708
Isph	P62623	ISPH_ECOLI	4-hydroxy-3-methylbut-2-enyl diphosphate reductase	20.6254	17.4136	0.104016	1.49243	3.71851	0.0643519	0.212562	3.21184	1.19144
Ivy	P0AD59	IVY_ECOLI	Inhibitor of vertebrate lysozyme	19.4559	19.4109	0.163731	0.226392	0.279033	0.795334	0.869149	0.0450104	0.0994505
Kate	P21179	CATE_ECOLI	Catalase HPII	18.8154	14.5821	0.123252	0.0992598	46.3336	2.09975e-06	0.000436748	4.23334	5.67783
Katg	P13029	KATG_ECOLI	Catalase-peroxidase	24.3957	23.4727	0.167619	0.155933	6.98262	0.00225569	0.0371631	0.922931	2.64672
Kbl	P0AB77	KBL_ECOLI	2-amino-3-ketobutyrate coenzyme A ligase	22.7153	23.7947	0.239899	0.15291	-6.57222	0.00483576	0.0522061	-1.07948	2.31554
Kch	P31069	KCH_ECOLI	Voltage-gated potassium channel Kch	18.3202	18.8344	0.713901	0.547641	-0.989849	0.381762	0.586718	-0.514202	0.418207
Kdgk	P37647	KDGK_ECOLI	2-dehydro-3-deoxygluconokinase	19.1132	18.9668	0.0568344	0.246662	1.00199	0.413115	0.610118	0.146433	0.383929
Kdgr	P76268	KDGR_ECOLI	Transcriptional regulator KdgR	22.7153	22.7823	0.0655364	0.0980588	-0.982655	0.388901	0.59207	-0.0669134	0.41016
Kdpd	P21865	KDPD_ECOLI	Sensor protein KdpD	15.2671	20.3238	4.01973	0.0665157	-2.17855	0.161163	0.357567	-5.05665	0.792735
Kdsa	P0A715	KDSA_ECOLI	2-dehydro-3-deoxyphosphooctonate aldolase	23.509	23.5353	0.095612	0.0578007	-0.407793	0.708533	0.809036	-0.0263045	0.14964
Kdsb	P04951	KDSB_ECOLI	3-deoxy-manno-octulosonate cytidylyltransferase	22.4454	22.5184	0.265045	0.194579	-0.38475	0.721663	0.817915	-0.0730384	0.141665
Kdsc	P0ABZ4	KDSC_ECOLI	3-deoxy-D-manno-octulosonate 8-phosphate phosphatase KdsC	18.5752	20.4253	0.85547	0.65627	-2.97206	0.0445571	0.168507	-1.8501	1.35108
Kdsd	P45395	KDSD_ECOLI	Arabinose 5-phosphate isomerase KdsD	21.5437	21.2705	0.601096	0.316037	0.696682	0.535718	0.694021	0.27316	0.271064
Kefb	P45522	KEFB_ECOLI	Glutathione-regulated potassium-efflux system protein KefB	13.1177	17.0158	0.308389	0.722437	-8.59555	0.00486295	0.0522061	-3.89818	2.3131
Kefg	P0A756	KEFG_ECOLI	Glutathione-regulated potassium-efflux system ancillary protein KefG	13.441	14.9929	0.398047	1.73768	-1.50779	0.259159	0.468197	-1.55187	0.586434
Kgtp	P0AEX3	KGTP_ECOLI	Alpha-ketoglutarate permease	14.0721	18.1727	1.60903	0.221653	-4.37274	0.045352	0.170236	-4.10053	1.3434
Krt1	P04264	K2C1_HUMAN	Keratin, type II cytoskeletal 1	18.1345	17.8324	1.03252	1.68734	0.264474	0.807025	0.874142	0.302057	0.0931129
Krt10	P13645	K1C10_HUMAN	Keratin, type I cytoskeletal 10	17.7102	18.9721	0.817354	2.32296	-0.887552	0.452146	0.635448	-1.26188	0.344721
Krt2	P35908	K22E_HUMAN	Keratin, type II cytoskeletal 2 epidermal	15.4396	17.4628	0.308389	1.92729	-1.79545	0.208253	0.41171	-2.02325	0.681408
Laci	P03023	LACI_ECOLI	Lactose operon repressor	21.3608	21.5697	0.0441669	0.0366482	-6.30333	0.00362147	0.0473317	-0.208861	2.44111
Lacz	P00722	BGAL_ECOLI	Beta-galactosidase	22.4522	18.6106	0.0845094	0.26753	23.7164	0.000671634	0.019607	3.84163	3.17287
Lamb	P02943	LAMB_ECOLI	Maltoporin	22.4074	22.0153	1.4857	0.311561	0.447436	0.695202	0.801674	0.392144	0.157889
Ldca	P76008	LDCA_ECOLI	Murein tetrapeptide carboxypeptidase	20.1282	20.5551	0.312317	0.105315	-2.24345	0.130428	0.322964	-0.426911	0.88463
Ldha	P52643	LDHD_ECOLI	D-lactate dehydrogenase	22.3244	23.767	0.629715	0.0994874	-3.91946	0.0548229	0.192865	-1.44266	1.26104
Lepa	P60785	LEPA_ECOLI	Elongation factor 4	23.8803	23.7128	0.0610868	0.107007	2.35507	0.0949569	0.267811	0.167536	1.02247
Lepb	P00803	LEP_ECOLI	Signal peptidase I	21.5713	21.1248	0.334246	0.389271	1.50717	0.207834	0.41171	0.446466	0.682284
Leua	P09151	LEU1_ECOLI	2-isopropylmalate synthase	23.7226	22.3935	0.164442	0.253285	7.6232	0.00288179	0.042064	1.32911	2.54034
Leub	P30125	LEU3_ECOLI	3-isopropylmalate dehydrogenase	23.7664	23.3576	0.0473917	0.0496759	10.3129	0.000504436	0.0172637	0.408789	3.29719
Leuc	P0A6A6	LEUC_ECOLI	3-isopropylmalate dehydratase large subunit	24.4124	19.8204	0.05079	0.304978	25.725	0.00113278	0.0251325	4.59202	2.94586
Leud	P30126	LEUD_ECOLI	3-isopropylmalate dehydratase small subunit	23.2716	17.7104	0.206865	1.03735	9.10621	0.00925957	0.071333	5.56123	2.03341
Leus	P07813	SYL_ECOLI	Leucine--tRNA ligase	24.5352	24.6714	0.0939963	0.17144	-1.20662	0.31146	0.518661	-0.136206	0.506597
Lexa	P0A7C2	LEXA_ECOLI	LexA repressor	20.0798	20.6438	0.43266	0.206048	-2.0385	0.1386	0.331366	-0.564006	0.858236
Lgt	P60955	LGT_ECOLI	Prolipoprotein diacylglyceryl transferase	21.4296	21.3896	0.104782	0.136763	0.401755	0.709719	0.809036	0.0399629	0.148913
Liga	P15042	DNLJ_ECOLI	DNA ligase	20.5533	20.5095	0.467835	1.06944	0.0649713	0.952644	0.971324	0.0437865	0.0210692
Ligt	P37025	LIGT_ECOLI	2'-5'-RNA ligase	14.4678	18.0764	2.63572	0.185138	-2.36557	0.14046	0.333417	-3.60864	0.852448
Lipa	P60716	LIPA_ECOLI	Lipoyl synthase	18.8655	13.9971	0.721196	0.0992598	11.5831	0.00643342	0.0597183	4.86845	2.19156
Lipb	P60720	LIPB_ECOLI	Octanoyltransferase	18.9695	18.8715	0.935004	0.747357	0.141863	0.894363	0.937756	0.0980384	0.0484863
Livf	P22731	LIVF_ECOLI	High-affinity branched-chain amino acid transport ATP-binding protein LivF	20.8113	21.2305	0.118665	0.32277	-2.11125	0.141835	0.334314	-0.419182	0.848215
Livg	P0A9S7	LIVG_ECOLI	High-affinity branched-chain amino acid transport ATP-binding protein LivG	20.9909	21.0687	0.243881	0.151154	-0.469107	0.667948	0.781621	-0.0777104	0.175258
Livj	P0AD96	LIVJ_ECOLI	Leu/Ile/Val-binding protein	25.3502	25.0223	0.265516	0.221331	1.64298	0.178034	0.384446	0.327893	0.749498
Livk	P04816	LIVK_ECOLI	Leucine-specific-binding protein	22.9374	22.2034	0.154235	0.377769	3.11536	0.0621694	0.208431	0.733926	1.20642
Livm	P22729	LIVM_ECOLI	High-affinity branched-chain amino acid transport system permease protein LivM	16.8749	17.9701	2.17783	0.233746	-0.866057	0.475976	0.654251	-1.09521	0.322415
Lldd	P33232	LLDD_ECOLI	L-lactate dehydrogenase [cytochrome]	17.9687	19.8364	0.23583	0.390685	-7.0886	0.00424582	0.0501067	-1.86764	2.37204
Loip	P25894	LOIP_ECOLI	Metalloprotease LoiP	17.197	14.5821	3.11302	0.0992598	1.45417	0.282875	0.491718	2.61491	0.548406
Lola	P61316	LOLA_ECOLI	Outer-membrane lipoprotein carrier protein	20.7539	21.0611	0.442321	0.368091	-0.924477	0.409167	0.607585	-0.307143	0.3881
Lolb	P61320	LOLB_ECOLI	Outer-membrane lipoprotein LolB	21.8048	21.5796	0.141391	0.680557	0.56109	0.627239	0.754138	0.225171	0.202567
Lolc	P0ADC3	LOLC_ECOLI	Lipoprotein-releasing system transmembrane protein LolC	20.505	20.9108	0.279986	0.561873	-1.11945	0.346106	0.551375	-0.405736	0.460791
Lold	P75957	LOLD_ECOLI	Lipoprotein-releasing system ATP-binding protein LolD	20.6677	20.7159	0.0596313	0.188256	-0.423102	0.707221	0.809036	-0.0482386	0.150445
Lole	P75958	LOLE_ECOLI	Lipoprotein-releasing system transmembrane protein LolE	19.3877	19.5465	0.300914	0.237528	-0.717075	0.514973	0.683403	-0.158714	0.288215
Lpda	P0A9P0	DLDH_ECOLI	Dihydrolipoyl dehydrogenase	26.2171	26.2606	0.0444032	0.0981354	-0.699778	0.537973	0.695022	-0.0435181	0.269239
Lpla	P32099	LPLA_ECOLI	Lipoate-protein ligase A	19.3921	17.0021	0.968447	2.01132	1.85439	0.164542	0.362285	2.39001	0.783724
Lpoa	P45464	LPOA_ECOLI	Penicillin-binding protein activator LpoA	20.4711	19.8799	0.725403	0.673358	1.0347	0.359559	0.56444	0.591268	0.44423
Lpob	P0AB38	LPOB_ECOLI	Penicillin-binding protein activator LpoB	20.3474	21.1034	0.501242	0.263756	-2.31202	0.103007	0.281985	-0.756059	0.987134
Lpp	P69776	LPP_ECOLI	Major outer membrane lipoprotein Lpp	21.9618	21.9299	0.132445	0.22731	0.20961	0.846551	0.903567	0.0318375	0.072347
Lpta	P0ADV1	LPTA_ECOLI	Lipopolysaccharide export system protein LptA	19.8364	20.4617	0.401153	0.227288	-2.34875	0.0958964	0.268639	-0.625233	1.0182
Lptb	P0A9V1	LPTB_ECOLI	Lipopolysaccharide export system ATP-binding protein LptB	22.1613	22.1606	0.140368	0.195119	0.00520714	0.996119	0.998291	0.000722615	0.00168899
Lptc	P0ADV9	LPTC_ECOLI	Lipopolysaccharide export system protein LptC	18.9733	19.5719	0.291243	0.305516	-2.45625	0.0701174	0.225242	-0.598576	1.15417
Lptd	P31554	LPTD_ECOLI	LPS-assembly protein LptD	22.7016	23.4466	0.550661	0.309418	-2.04287	0.129365	0.322251	-0.744986	0.888182
Lpte	P0ADC1	LPTE_ECOLI	LPS-assembly lipoprotein LptE	20.647	20.9791	0.401229	0.343238	-1.0893	0.338609	0.544919	-0.332072	0.470301
Lptf	P0AF98	LPTF_ECOLI	Lipopolysaccharide export system permease protein LptF	17.0968	17.3029	0.901783	0.386701	-0.363898	0.742431	0.830245	-0.206147	0.129344
Lptg	P0ADC6	LPTG_ECOLI	Lipopolysaccharide export system permease protein LptG	19.4804	20.142	0.449014	0.72971	-1.3375	0.265206	0.474519	-0.661619	0.576417
Lpxa	P0A722	LPXA_ECOLI	Acyl-[acyl-carrier-protein]--UDP-N-acetylglucosamine O-acyltransferase	20.8373	20.4537	0.420549	0.324153	1.25128	0.283092	0.491718	0.383592	0.548072
Lpxb	P10441	LPXB_ECOLI	Lipid-A-disaccharide synthase	17.2835	18.2905	2.81974	0.452993	-0.610705	0.600865	0.730343	-1.00696	0.221223
Lpxc	P0A725	LPXC_ECOLI	UDP-3-O-[3-hydroxymyristoyl] N-acetylglucosamine deacetylase	19.0253	20.0548	0.177065	0.28315	-5.33945	0.00958453	0.0719937	-1.02949	2.01843
Lpxd	P21645	LPXD_ECOLI	UDP-3-O-(3-hydroxymyristoyl)glucosamine N-acyltransferase	21.3066	21.166	0.0961867	0.505982	0.472963	0.680043	0.791313	0.14064	0.167463
Lpxk	P27300	LPXK_ECOLI	Tetraacyldisaccharide 4'-kinase	15.6359	13.9971	1.39029	0.0992598	2.03646	0.177343	0.384244	1.6388	0.751185
Lrha	P36771	LRHA_ECOLI	Probable HTH-type transcriptional regulator LrhA	19.2008	19.6724	0.312396	0.18145	-2.26102	0.102978	0.281985	-0.471601	0.987256
Lrp	P0ACJ0	LRP_ECOLI	Leucine-responsive regulatory protein	24.3633	24.1274	0.0587235	0.12554	2.94816	0.0644639	0.212562	0.235907	1.19068
Ltae	P75823	LTAE_ECOLI	Low specificity L-threonine aldolase	22.6702	23.0035	0.0499046	0.0539694	-7.85429	0.00145578	0.0295417	-0.333327	2.8369
Luxs	P45578	LUXS_ECOLI	S-ribosylhomocysteine lyase	21.9284	21.8263	0.29667	0.551184	0.282562	0.795502	0.869149	0.102116	0.099359
Lysa	P00861	DCDA_ECOLI	Diaminopimelate decarboxylase	23.1252	22.6748	0.0138515	0.0808578	9.5101	0.00901713	0.0701145	0.45043	2.04493
Lysc	P08660	AK3_ECOLI	Lysine-sensitive aspartokinase 3	25.214	24.3517	0.0671461	0.0911585	13.1907	0.000313977	0.0139068	0.862234	3.5031
Lysp	P25737	LYSP_ECOLI	Lysine-specific permease	20.37	18.517	0.393855	0.337735	6.18599	0.00374312	0.0473317	1.853	2.42677
Lyss	P0A8N3	SYK1_ECOLI	Lysine--tRNA ligase	24.1276	24.1609	0.184273	0.15932	-0.236764	0.824702	0.887074	-0.0332986	0.0837032
Lysu	P0A8N5	SYK2_ECOLI	Lysine--tRNA ligase, heat inducible	18.8117	19.9281	0.391427	0.328495	-3.78408	0.0204414	0.1112	-1.11641	1.68949
Maca	P75830	MACA_ECOLI	Macrolide export protein MacA	20.6141	21.2525	0.210494	0.216114	-3.66541	0.0215037	0.113956	-0.638431	1.66749
Maea	P26616	MAO1_ECOLI	NAD-dependent malic enzyme	22.4413	21.6662	0.11641	0.195459	5.90087	0.00766178	0.0641874	0.775057	2.11567
Maeb	P76558	MAO2_ECOLI	NADP-dependent malic enzyme	23.728	23.0561	0.158366	0.1613	5.14819	0.00675909	0.0611256	0.671882	2.17011
Mak	P23917	MAK_ECOLI	Fructokinase	24.6991	23.8256	0.228185	0.320127	3.84811	0.0221101	0.116428	0.873416	1.65541
Male	P0AEX9	MALE_ECOLI	Maltose-binding periplasmic protein	26.6354	24.1544	0.204589	0.387184	9.813	0.00213882	0.0366907	2.48101	2.66983
Malf	P02916	MALF_ECOLI	Maltose transport system permease protein MalF	22.2651	17.7917	0.0998136	0.516845	14.7191	0.0033927	0.0454824	4.47334	2.46945
Malg	P68183	MALG_ECOLI	Maltose transport system permease protein MalG	19.3605	17.3558	0.147913	0.547554	6.12215	0.0183253	0.106338	2.00477	1.73695
Malk	P68187	MALK_ECOLI	Maltose/maltodextrin import ATP-binding protein MalK	23.7919	20.8958	0.128026	0.157116	24.7505	2.21291e-05	0.0026302	2.89614	4.65504
Malm	P03841	MALM_ECOLI	Maltose operon periplasmic protein	23.1293	20.7182	0.414083	0.628009	5.55169	0.00779729	0.0648735	2.41112	2.10806
Malp	P00490	PHSM_ECOLI	Maltodextrin phosphorylase	25.9669	25.0486	0.113269	0.162487	8.02981	0.00207383	0.0365623	0.918258	2.68323
Malq	P15977	MALQ_ECOLI	4-alpha-glucanotransferase	23.8282	22.8066	0.107362	0.31477	5.32052	0.0210918	0.112489	1.02161	1.67589
Mals	P25718	AMY1_ECOLI	Alpha-amylase	17.3936	15.4991	0.445393	0.849541	3.42089	0.0413472	0.164791	1.8945	1.38355
Malt	P06993	MALT_ECOLI	HTH-type transcriptional regulator MalT	21.6859	14.5821	0.329737	0.0992598	35.7314	0.000278835	0.0136117	7.10385	3.55465
Maly	P23256	MALY_ECOLI	Protein MalY	13.9646	12.9971	1.26158	0.0992598	1.32428	0.315118	0.521748	0.96755	0.501527
Malz	P21517	MALZ_ECOLI	Maltodextrin glucosidase	19.5937	16.6581	0.179662	2.61984	1.93625	0.191275	0.395173	2.93559	0.718341
Mana	P00946	MANA_ECOLI	Mannose-6-phosphate isomerase	21.3661	21.7547	0.291176	0.18993	-1.93632	0.136369	0.32973	-0.388645	0.865284
Manb	P24175	MANB_ECOLI	Phosphomannomutase	19.0975	18.8394	0.75869	0.820114	0.400142	0.709618	0.809036	0.258104	0.148976
Manx	P69797	PTNAB_ECOLI	PTS system mannose-specific EIIAB component	24.6079	23.8614	0.174095	0.25627	4.17383	0.0181832	0.106338	0.746573	1.74033
Many	P69801	PTNC_ECOLI	Mannose permease IIC component	20.3305	19.3964	0.0655746	0.314322	5.03876	0.0312675	0.143181	0.93409	1.50491
Manz	P69805	PTND_ECOLI	Mannose permease IID component	24.0411	23.1655	0.0399519	0.255088	5.87373	0.0248245	0.126344	0.875601	1.60512
Map	P0AE18	MAP1_ECOLI	Methionine aminopeptidase	22.9093	23.6093	0.322897	0.20405	-3.17396	0.0427083	0.166276	-0.69995	1.36949
Matb	U5TSK2	U5TSK2_RHILE	Malonyl CoA synthetase	26.6173	26.3553	0.070362	0.146885	2.78627	0.0721253	0.229039	0.261998	1.14191
Matc	Q9ZIP4	Q9ZIP4_RHILE	Dicarboxylate carrier protein MatC N-terminus family protein	21.8927	23.9963	1.02866	0.136111	-3.51138	0.0688826	0.222564	-2.10357	1.16189
Matp	P0A8N0	MATP_ECOLI	Macrodomain Ter protein	18.7058	17.3079	2.3611	2.81518	0.658978	0.54694	0.701103	1.39791	0.26206
Mazg	P0AEY3	MAZG_ECOLI	Nucleoside triphosphate pyrophosphohydrolase	17.508	17.6783	1.39305	0.917342	-0.17679	0.869528	0.922542	-0.170248	0.0607167
Mcba	P0AAX6	MCBA_ECOLI	Uncharacterized protein McbA	13.1177	13.4442	0.308389	0.755274	-0.693361	0.543935	0.698925	-0.326578	0.264453
Mdab	P0AEY5	MDAB_ECOLI	Modulator of drug activity B	14.1177	15.8108	0.308389	1.48066	-1.93895	0.181827	0.385224	-1.69309	0.740341
Mdh	P61889	MDH_ECOLI	Malate dehydrogenase	25.2063	25.1201	0.353083	0.222578	0.357759	0.741761	0.830245	0.0862112	0.129736
Mdob	P39401	OPGB_ECOLI	Phosphoglycerol transferase I	16.6705	17.9803	2.32863	0.285752	-0.966969	0.43301	0.622665	-1.30978	0.363502
Mdod	P40120	OPGD_ECOLI	Glucans biosynthesis protein D	21.1251	20.8945	0.122222	0.430875	0.891448	0.455361	0.636205	0.230511	0.341644
Mdog	P33136	OPGG_ECOLI	Glucans biosynthesis protein G	22.6844	22.7342	0.185602	0.182766	-0.331074	0.75721	0.843004	-0.0497901	0.120784
Mdoh	P62517	OPGH_ECOLI	Glucans biosynthesis glucosyltransferase H	21.8994	21.7564	1.1182	0.449197	0.205523	0.852025	0.908244	0.14299	0.0695479
Menb	P0ABU0	MENB_ECOLI	1,4-Dihydroxy-2-naphthoyl-CoA synthase	21.4587	21.7095	0.221351	0.439016	-0.883598	0.442881	0.62773	-0.250819	0.353713
Menc	P29208	MENC_ECOLI	o-succinylbenzoate synthase	15.6327	16.7855	2.56935	1.14472	-0.70988	0.532961	0.694021	-1.15283	0.273304
Meta	P07623	META_ECOLI	Homoserine O-succinyltransferase	23.49	23.3836	0.0785027	0.0404184	2.0859	0.12856	0.322251	0.106335	0.890894
Metb	P00935	METB_ECOLI	Cystathionine gamma-synthase	22.6759	22.4138	0.00814369	0.33826	1.34162	0.311628	0.518661	0.262087	0.506364
Metc	P06721	METC_ECOLI	Cystathionine beta-lyase MetC	23.1423	22.5342	0.0492821	0.0372399	17.0514	0.000113891	0.00701903	0.608104	3.94351
Mete	P25665	METE_ECOLI	5-methyltetrahydropteroyltriglutamate--homocysteine methyltransferase	28.3698	28.2028	0.0948035	0.217942	1.21702	0.318246	0.523128	0.166997	0.497237
Metf	P0AEZ1	METF_ECOLI	5,10-methylenetetrahydrofolate reductase	24.0888	23.7648	0.0557652	0.163676	3.24597	0.0629772	0.210008	0.324054	1.20082
Metg	P00959	SYM_ECOLI	Methionine--tRNA ligase	24.6969	24.8909	0.0895879	0.156554	-1.86214	0.154178	0.34875	-0.193922	0.811979
Meth	P13009	METH_ECOLI	Methionine synthase	24.4275	24.2643	0.0592193	0.157	1.68495	0.206089	0.410942	0.163234	0.685945
Meti	P31547	METI_ECOLI	D-methionine transport system permease protein MetI	14.4858	14.4373	2.15676	2.59048	0.0249174	0.981352	0.988599	0.0484924	0.00817539
Metj	P0A8U6	METJ_ECOLI	Met repressor	20.1076	18.4213	0.275876	0.363439	6.4012	0.00386989	0.0477	1.68631	2.4123
Metk	P0A817	METK_ECOLI	S-adenosylmethionine synthase	25.7638	25.6237	0.0558706	0.110755	1.95545	0.146862	0.339569	0.14005	0.83309
Metl	P00562	AK2H_ECOLI	Bifunctional aspartokinase/homoserine dehydrogenase 2	23.7379	23.5899	0.0880208	0.105322	1.86855	0.137307	0.32985	0.148077	0.862307
Metn	P30750	METN_ECOLI	Methionine import ATP-binding protein MetN	22.81	22.6421	0.0400514	0.0418482	5.01831	0.00743157	0.0639178	0.16783	2.12892
Metq	P28635	METQ_ECOLI	D-methionine-binding lipoprotein MetQ	25.4494	25.8698	0.252675	0.146161	-2.49427	0.0827879	0.250017	-0.420361	1.08203
Metr	P0A9F9	METR_ECOLI	HTH-type transcriptional regulator MetR	16.7239	13.9971	1.96316	0.0992598	2.40272	0.137562	0.32985	2.7268	0.861502
Mfd	P30958	MFD_ECOLI	Transcription-repair-coupling factor	22.8363	23.0032	0.278551	0.148501	-0.915701	0.426303	0.617917	-0.166885	0.370281
Mgsa	P0A731	MGSA_ECOLI	Methylglyoxal synthase	21.2729	21.1215	0.23639	0.706766	0.351783	0.753101	0.839357	0.151362	0.123147
Mgta	P0ABB8	ATMA_ECOLI	Magnesium-transporting ATPase, P-type 1	19.656	19.2326	0.99001	1.10509	0.494336	0.647281	0.768665	0.423455	0.188907
Mhpa	P77397	MHPA_ECOLI	3-(3-hydroxy-phenyl)propionate/3-hydroxycinnamic acid hydroxylase	22.5864	23.1064	0.141402	0.161524	-4.19486	0.0142619	0.0905796	-0.519918	1.84582
Mhpb	P0ABR9	MHPB_ECOLI	2,3-dihydroxyphenylpropionate/2,3-dihydroxicinnamic acid 1,2-dioxygenase	21.2361	21.4626	0.0622933	0.066699	-4.29758	0.0127981	0.0865692	-0.226446	1.89286
Mhpc	P77044	MHPC_ECOLI	2-hydroxy-6-oxononadienedioate/2-hydroxy-6-oxononatrienedioate hydrolase	25.2306	25.5852	0.0993416	0.0413286	-5.70693	0.0145125	0.0914728	-0.354516	1.83826
Mhpd	P77608	MHPD_ECOLI	2-keto-4-pentenoate hydratase	22.7571	22.4005	0.0480837	0.0821206	6.49112	0.00591591	0.0566563	0.356634	2.22798
Mhpe	P51020	HOA_ECOLI	4-hydroxy-2-oxovalerate aldolase	23.1575	22.9487	0.306055	0.37001	0.753072	0.494683	0.670457	0.208778	0.305673
Mhpf	P77580	ACDH_ECOLI	Acetaldehyde dehydrogenase	22.5859	22.2531	0.0680312	0.090182	5.10297	0.00844888	0.067591	0.332817	2.0732
Mhpt	P77589	MHPT_ECOLI	3-(3-hydroxy-phenyl)propionate transporter	15.4913	19.7922	1.32794	0.790541	-4.8203	0.0140242	0.089519	-4.30096	1.85312
Miaa	P16384	MIAA_ECOLI	tRNA dimethylallyltransferase	17.4901	14.9796	0.501561	1.79767	2.32986	0.128093	0.322251	2.51049	0.892475
Miab	P0AEI1	MIAB_ECOLI	(Dimethylallyl)adenosine tRNA methylthiotransferase MiaB	21.3734	18.2636	0.231461	1.65898	3.21568	0.0804749	0.245707	3.10986	1.09434
Minc	P18196	MINC_ECOLI	Septum site-determining protein MinC	19.4076	19.5217	0.21216	0.248262	-0.605605	0.578207	0.715876	-0.114183	0.237917
Mind	P0AEZ3	MIND_ECOLI	Septum site-determining protein MinD	24.124	24.3705	0.0221193	0.0453317	-8.46294	0.00392651	0.048042	-0.246456	2.40599
Mine	P0A734	MINE_ECOLI	Cell division topological specificity factor	22.402	22.8251	0.133487	0.145815	-3.70637	0.021005	0.112387	-0.423029	1.67768
Mioc	P03817	MIOC_ECOLI	Protein MioC	19.9247	21.4014	1.12174	0.333601	-2.18545	0.141186	0.333713	-1.47664	0.850208
Mipa	P0A908	MIPA_ECOLI	MltA-interacting protein	18.4973	20.5178	1.08088	0.493826	-2.94485	0.0656295	0.214975	-2.02044	1.1829
Mlaa	P76506	MLAA_ECOLI	Probable phospholipid-binding lipoprotein MlaA	20.4177	20.8765	1.12588	0.330535	-0.67724	0.559005	0.708982	-0.458805	0.252584
Mlab	P64602	MLAB_ECOLI	Probable phospholipid ABC transporter-binding protein MlaB	18.9645	17.4826	0.446109	2.92328	0.867978	0.473382	0.652616	1.48189	0.324788
Mlac	P0ADV7	MLAC_ECOLI	Probable phospholipid-binding protein MlaC	22.7412	22.7679	0.5548	0.183961	-0.0793057	0.942842	0.966736	-0.0267628	0.0255613
Mlad	P64604	MLAD_ECOLI	Probable phospholipid ABC transporter-binding protein MlaD	20.9689	22.4458	1.02022	0.0550157	-2.50365	0.128588	0.322251	-1.47686	0.8908
Mlae	P64606	MLAE_ECOLI	Probable phospholipid ABC transporter permease protein MlaE	19.2795	19.2991	0.426331	0.390077	-0.0587214	0.956012	0.973564	-0.019591	0.0195368
Mlaf	P63386	MLAF_ECOLI	Probable phospholipid import ATP-binding protein MlaF	21.9589	20.1856	0.110659	1.32303	2.31347	0.145046	0.33662	1.77331	0.838494
Mlc	P50456	MLC_ECOLI	Protein mlc	17.1436	17.3084	2.84437	2.77387	-0.0718618	0.946164	0.967943	-0.164838	0.0240338
Mlta	P0A935	MLTA_ECOLI	Membrane-bound lytic murein transglycosylase A	16.4231	14.4034	3.09812	2.36632	0.89737	0.423512	0.614942	2.01977	0.373134
Mltb	P41052	MLTB_ECOLI	Membrane-bound lytic murein transglycosylase B	18.3217	19.3517	1.77117	1.95765	-0.675801	0.536571	0.694021	-1.03004	0.270373
Mltc	P0C066	MLTC_ECOLI	Membrane-bound lytic murein transglycosylase C	15.7488	16.1104	2.00044	2.60748	-0.190571	0.858733	0.912472	-0.361595	0.0661419
Mnma	P25745	MNMA_ECOLI	tRNA-specific 2-thiouridylase MnmA	20.3974	21.0718	1.04593	0.706689	-0.925424	0.413852	0.610118	-0.674433	0.383155
Mnme	P25522	MNME_ECOLI	tRNA modification GTPase MnmE	21.1357	21.1622	0.384666	0.167234	-0.109161	0.920596	0.955628	-0.0264353	0.035931
Mnmg	P0A6U3	MNMG_ECOLI	tRNA uridine 5-carboxymethylaminomethyl modification enzyme MnmG	21.0507	19.5991	0.187529	0.696528	3.48548	0.060294	0.204369	1.45156	1.21973
Mnth	P0A769	MNTH_ECOLI	Divalent metal cation transporter MntH	16.5955	21.9678	1.90503	0.162429	-4.86679	0.0385943	0.161429	-5.37225	1.41348
Mntr	P0A9F1	MNTR_ECOLI	Transcriptional regulator MntR	13.1177	16.1448	0.308389	2.63077	-1.97943	0.182913	0.385224	-3.0271	0.737754
Moab	P0AEZ9	MOAB_ECOLI	Molybdenum cofactor biosynthesis protein B	21.624	22.4908	0.374848	0.188421	-3.5786	0.0383507	0.16115	-0.866813	1.41623
Moac	P0A738	MOAC_ECOLI	Cyclic pyranopterin monophosphate synthase accessory protein	13.1177	15.2973	0.308389	1.89631	-1.96506	0.181908	0.385224	-2.17969	0.740148
Moad	P30748	MOAD_ECOLI	Molybdopterin synthase sulfur carrier subunit	13.1177	16.9387	0.308389	3.32698	-1.98079	0.183986	0.385224	-3.82109	0.735215
Moae	P30749	MOAE_ECOLI	Molybdopterin synthase catalytic subunit	13.1177	17.1636	0.308389	3.51372	-1.98676	0.18338	0.385224	-4.04593	0.736648
Moba	P32173	MOBA_ECOLI	Molybdenum cofactor guanylyltransferase	19.5334	19.6459	0.416852	1.04692	-0.172863	0.875236	0.92587	-0.112463	0.0578746
Mobb	P32125	MOBB_ECOLI	Molybdopterin-guanine dinucleotide biosynthesis adapter protein	17.6118	17.8076	0.368743	0.414965	-0.61095	0.574676	0.714278	-0.195812	0.240577
Moea	P12281	MOEA_ECOLI	Molybdopterin molybdenumtransferase	21.8072	22.0589	0.235005	0.0214194	-1.84682	0.203972	0.408927	-0.251615	0.69043
Mog	P0AF03	MOG_ECOLI	Molybdopterin adenylyltransferase	19.6482	20.424	0.911187	0.130584	-1.4598	0.277107	0.485449	-0.775809	0.557353
Mpl	P37773	MPL_ECOLI	UDP-N-acetylmuramate:L-alanyl-gamma-D-glutamyl-meso-diaminopimelate ligase	21.5661	21.9554	0.0202663	0.149792	-4.46146	0.0437381	0.167203	-0.389354	1.35914
Mppa	P77348	MPPA_ECOLI	Periplasmic murein peptide-binding protein	16.2733	15.2636	0.170341	2.04541	0.852134	0.482838	0.660183	1.00978	0.316198
Mpra	P0ACR9	MPRA_ECOLI	Transcriptional repressor MprA	21.2438	21.0887	0.19494	0.075817	1.28426	0.301829	0.509809	0.155089	0.520239
Mqo	P33940	MQO_ECOLI	Malate:quinone oxidoreductase	15.2598	18.9816	0.771492	0.270911	-7.88369	0.00808134	0.0659184	-3.72177	2.09252
Mraz	P22186	MRAZ_ECOLI	Protein MraZ	17.9593	18.1955	0.0898389	0.134274	-2.53237	0.0735075	0.230786	-0.236206	1.13367
Mrca	P02918	PBPA_ECOLI	Penicillin-binding protein 1A	19.9405	19.5011	0.105515	0.756582	0.996318	0.420691	0.614482	0.439416	0.376037
Mrcb	P02919	PBPB_ECOLI	Penicillin-binding protein 1B	22.5837	22.8823	0.103778	0.278076	-1.74225	0.195886	0.398964	-0.298557	0.707997
Mreb	P0A9X4	MREB_ECOLI	Rod shape-determining protein MreB	23.7605	23.6019	0.0732902	0.0408909	3.27252	0.0438168	0.167203	0.158568	1.35836
Mrp	P0AF08	MRP_ECOLI	Protein mrp	19.8221	20.0924	0.613174	0.0611031	-0.75973	0.525411	0.689498	-0.270289	0.279501
Mrr	P24202	MRR_ECOLI	Mrr restriction system protein	18.5666	16.7575	0.717401	0.379651	3.86046	0.030028	0.139183	1.80907	1.52247
Msba	P60752	MSBA_ECOLI	Lipid A export ATP-binding/permease protein MsbA	21.4144	21.892	0.346622	0.333139	-1.72076	0.16052	0.356616	-0.477625	0.794471
Msbb	P24205	MSBB_ECOLI	Lipid A biosynthesis (KDO)2-(lauroyl)-lipid IVA acyltransferase	21.1596	20.2905	0.2524	1.42783	1.03824	0.402692	0.60211	0.86915	0.395027
Msck	P77338	MSCK_ECOLI	Mechanosensitive channel MscK	17.4623	18.5106	1.07123	0.398524	-1.58862	0.226207	0.4292	-1.04831	0.645494
Mscl	P0A742	MSCL_ECOLI	Large-conductance mechanosensitive channel	21.1604	21.4454	0.199938	0.745439	-0.639727	0.580556	0.717716	-0.285057	0.236156
Mscm	P39285	MSCM_ECOLI	Miniconductance mechanosensitive channel MscM	18.6035	18.6745	0.678655	0.468633	-0.149167	0.889496	0.933241	-0.0710278	0.0508562
Mscs	P0C0S1	MSCS_ECOLI	Small-conductance mechanosensitive channel	22.4068	23.4705	0.362273	0.178608	-4.56177	0.0209671	0.112387	-1.06379	1.67846
Msra	P0A744	MSRA_ECOLI	Peptide methionine sulfoxide reductase MsrA	20.9729	22.5514	0.687785	0.497874	-3.22014	0.036869	0.157234	-1.57855	1.43334
Msrb	P0A746	MSRB_ECOLI	Peptide methionine sulfoxide reductase MsrB	20.1563	19.7239	0.254059	0.452625	1.44293	0.240689	0.442558	0.432409	0.618544
Msrc	P76270	MSRC_ECOLI	Free methionine-R-sulfoxide reductase	21.843	21.5644	0.173312	0.136865	2.18511	0.0978618	0.273225	0.278602	1.00939
Msyb	P25738	MSYB_ECOLI	Acidic protein MsyB	13.1177	12.9971	0.308389	0.0992598	0.644587	0.5752	0.714278	0.120566	0.240181
Mtfa	P76346	MTFA_ECOLI	Protein MtfA	19.2952	18.6744	0.455099	0.710798	1.27414	0.282649	0.491718	0.620871	0.548752
Mtla	P00550	PTM3C_ECOLI	PTS system mannitol-specific EIICBA component	23.326	23.0536	0.0805162	0.25061	1.79225	0.193094	0.397244	0.272375	0.714231
Mtld	P09424	MTLD_ECOLI	Mannitol-1-phosphate 5-dehydrogenase	21.0225	21.4866	0.342484	0.14899	-2.15247	0.129266	0.322251	-0.464146	0.888516
Mtnn	P0AF12	MTNN_ECOLI	5'-methylthioadenosine/S-adenosylhomocysteine nucleosidase	22.8619	23.1286	0.0737946	0.221231	-1.98046	0.162717	0.360534	-0.266661	0.788567
Mug	P0A9H1	MUG_ECOLI	G/U mismatch-specific DNA glycosylase	17.9529	19.0964	0.186326	1.09143	-1.78873	0.208576	0.41171	-1.14346	0.680735
Mukb	P22523	MUKB_ECOLI	Chromosome partition protein MukB	22.5086	22.0979	0.193972	0.0369579	3.60299	0.0622538	0.208431	0.410757	1.20583
Muke	P22524	MUKE_ECOLI	Chromosome partition protein MukE	21.0882	20.4604	0.0659095	0.445407	2.41505	0.13181	0.324753	0.627807	0.880052
Mukf	P60293	MUKF_ECOLI	Chromosome partition protein MukF	20.2528	19.7899	0.497366	0.641754	0.98759	0.382484	0.586718	0.462947	0.417386
Mura	P0A749	MURA_ECOLI	UDP-N-acetylglucosamine 1-carboxyvinyltransferase	23.217	23.2429	0.0785274	0.0257448	-0.543579	0.632629	0.758138	-0.0259353	0.198851
Murb	P08373	MURB_ECOLI	UDP-N-acetylenolpyruvoylglucosamine reductase	19.8894	20.2382	0.223083	0.243447	-1.82956	0.141842	0.334314	-0.348791	0.848194
Murc	P17952	MURC_ECOLI	UDP-N-acetylmuramate--L-alanine ligase	21.2886	21.4648	0.487431	0.344923	-0.510929	0.639108	0.763443	-0.176143	0.194425
Murd	P14900	MURD_ECOLI	UDP-N-acetylmuramoylalanine--D-glutamate ligase	21.5192	21.8248	0.472393	0.142597	-1.07261	0.380695	0.586718	-0.305577	0.419423
Mure	P22188	MURE_ECOLI	UDP-N-acetylmuramoyl-L-alanyl-D-glutamate--2,6-diaminopimelate ligase	21.9346	22.0917	0.0486323	0.143983	-1.79108	0.191412	0.395173	-0.157154	0.718031
Murf	P11880	MURF_ECOLI	UDP-N-acetylmuramoyl-tripeptide--D-alanyl-D-alanine ligase	20.6679	20.6665	0.529565	0.289309	0.00405043	0.997015	0.998291	0.00141115	0.00129824
Murg	P17443	MURG_ECOLI	UDP-N-acetylglucosamine--N-acetylmuramyl-(pentapeptide) pyrophosphoryl-undecaprenol N-acetylglucosamine transferase	21.5792	21.6656	0.777436	0.386087	-0.172314	0.874403	0.925577	-0.0863559	0.0582883
Muri	P22634	MURI_ECOLI	Glutamate racemase	18.7896	18.0981	0.202085	1.94591	0.61222	0.601569	0.730665	0.691509	0.220715
Mutl	P23367	MUTL_ECOLI	DNA mismatch repair protein MutL	19.315	19.6431	0.451487	0.733212	-0.659879	0.552184	0.705039	-0.328051	0.257916
Muts	P23909	MUTS_ECOLI	DNA mismatch repair protein MutS	18.6375	17.4664	0.204407	1.88682	1.06879	0.394873	0.596792	1.17111	0.403543
Nac	Q47005	NAC_ECOLI	Nitrogen assimilation regulatory protein nac	15.672	17.9496	2.47787	0.343757	-1.57693	0.251004	0.455973	-2.27756	0.600319
Nada	P11458	NADA_ECOLI	Quinolinate synthase A	17.8769	16.5835	1.27093	1.63769	1.08063	0.344126	0.549017	1.29334	0.463283
Nadb	P10902	NADB_ECOLI	L-aspartate oxidase	21.2689	22.125	0.0528736	0.257016	-5.65107	0.0248284	0.126344	-0.856114	1.60505
Nadc	P30011	NADC_ECOLI	Nicotinate-nucleotide pyrophosphorylase [carboxylating]	22.0875	22.1514	0.137379	0.0172388	-0.799974	0.50542	0.677789	-0.0639481	0.296348
Nade	P18843	NADE_ECOLI	NH(3)-dependent NAD(+) synthetase	23.8723	24.4982	0.0193378	0.0418776	-23.5033	0.000256432	0.0131107	-0.625924	3.59103
Nadr	P27278	NADR_ECOLI	Trifunctional NAD biosynthesis/regulator protein NadR	20.1185	19.6699	0.254614	0.428321	1.5596	0.209662	0.412678	0.448674	0.678481
Naga	P0AF18	NAGA_ECOLI	N-acetylglucosamine-6-phosphate deacetylase	20.4498	21.654	0.298015	0.740174	-2.61393	0.090915	0.259936	-1.20418	1.04136
Nagc	P0AF20	NAGC_ECOLI	N-acetylglucosamine repressor	21.0915	21.7836	0.195898	0.159387	-4.74644	0.00993146	0.0734487	-0.69207	2.00299
Nagd	P0AF24	NAGD_ECOLI	Ribonucleotide monophosphatase NagD	21.2524	21.7705	0.254328	0.294617	-2.30557	0.0838398	0.251335	-0.518082	1.07655
Nage	P09323	PTW3C_ECOLI	PTS system N-acetylglucosamine-specific EIICBA component	21.4774	21.4852	0.338465	0.534863	-0.0214643	0.984081	0.990198	-0.00784388	0.00696927
Nagz	P75949	NAGZ_ECOLI	Beta-hexosaminidase	18.7733	18.2465	0.684969	0.377667	1.16645	0.324957	0.530366	0.526765	0.488175
Nanr	P0A8W0	NANR_ECOLI	Transcriptional regulator NanR	19.6224	19.3546	0.530019	0.542783	0.611339	0.57403	0.714278	0.267767	0.241066
Narl	P0AF28	NARL_ECOLI	Nitrate/nitrite response regulator protein NarL	22.0869	22.5702	0.0571691	0.246285	-3.31081	0.0699042	0.224992	-0.483289	1.1555
Narp	P31802	NARP_ECOLI	Nitrate/nitrite response regulator protein NarP	19.3957	17.4235	0.459479	2.00987	1.65683	0.227581	0.431314	1.97218	0.642865
Narx	P0AFA2	NARX_ECOLI	Nitrate/nitrite sensor protein NarX	14.0689	14.1094	1.43989	1.90368	-0.0293959	0.978056	0.986676	-0.0405097	0.00963633
Ndh	P00393	DHNA_ECOLI	NADH dehydrogenase	23.6685	23.8875	0.123565	0.0675739	-2.69358	0.0716527	0.22841	-0.219019	1.14477
Ndk	P0A763	NDK_ECOLI	Nucleoside diphosphate kinase	24.3079	23.2449	0.108037	0.23655	7.07992	0.00724861	0.0634726	1.06299	2.13975
Nema	P77258	NEMA_ECOLI	N-ethylmaleimide reductase	22.141	22.685	0.540203	0.328505	-1.49051	0.224784	0.428454	-0.544076	0.648235
Nfi	P68739	NFI_ECOLI	Endonuclease V	18.767	18.9435	0.177131	0.223746	-1.0709	0.347463	0.552753	-0.176442	0.459091
Nfnb	P38489	NFNB_ECOLI	Oxygen-insensitive NAD(P)H nitroreductase	22.214	22.3984	0.559792	0.333465	-0.490349	0.655007	0.774099	-0.184466	0.183754
Nfsa	P17117	NFSA_ECOLI	Oxygen-insensitive NADPH nitroreductase	21.9348	22.693	0.479129	0.31312	-2.29462	0.094113	0.265881	-0.758276	1.02635
Nfua	P63020	NFUA_ECOLI	Fe/S biogenesis protein NfuA	21.2176	22.0842	0.471181	0.322345	-2.62898	0.0661072	0.216115	-0.866523	1.17975
Nhab	P0AFA7	NHAB_ECOLI	Na(+)/H(+) antiporter NhaB	19.2524	18.9472	0.0713349	0.753725	0.69832	0.556139	0.707504	0.305241	0.254817
Nikr	P0A6Z6	NIKR_ECOLI	Nickel-responsive regulator	19.3119	19.0132	0.225847	0.445469	1.03568	0.377336	0.586262	0.298645	0.423272
Nlpa	P04846	NLPA_ECOLI	Lipoprotein 28	22.5062	22.5092	0.109584	0.229904	-0.0203376	0.985107	0.990464	-0.00299049	0.0065165
Nlpd	P0ADA3	NLPD_ECOLI	Murein hydrolase activator NlpD	20.7002	20.7749	0.535985	0.182017	-0.228452	0.836956	0.89706	-0.0746599	0.0772975
Nnr	P31806	NNR_ECOLI	Bifunctional NAD(P)H-hydrate repair enzyme Nnr	13.1177	16.8448	0.308389	3.36036	-1.91308	0.193754	0.398032	-3.72718	0.71275
Nrda	P00452	RIR1_ECOLI	Ribonucleoside-diphosphate reductase 1 subunit alpha	23.3615	23.5113	0.181409	0.104229	-1.23978	0.298424	0.506195	-0.149757	0.525166
Nrdb	P69924	RIR2_ECOLI	Ribonucleoside-diphosphate reductase 1 subunit beta	21.5797	21.6029	0.162265	0.309685	-0.114906	0.915732	0.952832	-0.0231942	0.0382318
Nrde	P39452	RIR3_ECOLI	Ribonucleoside-diphosphate reductase 2 subunit alpha	19.4853	23.0793	0.853938	0.0104231	-7.28911	0.0182913	0.106338	-3.59395	1.73776
Nrdf	P37146	RIR4_ECOLI	Ribonucleoside-diphosphate reductase 2 subunit beta	19.9927	22.6605	0.252286	0.235522	-13.3883	0.000185246	0.0110089	-2.66781	3.73225
Nrdi	P0A772	NRDI_ECOLI	Protein NrdI	13.1177	14.1234	0.308389	2.04676	-0.841596	0.485265	0.661328	-1.00574	0.314021
Nrdr	P0A8D0	NRDR_ECOLI	Transcriptional repressor NrdR	15.9753	16.6537	1.68181	2.21378	-0.422625	0.695774	0.801778	-0.678367	0.157532
Nude	P45799	NUDE_ECOLI	ADP compounds hydrolase NudE	21.3096	21.8135	0.217406	0.384067	-1.97774	0.137648	0.32985	-0.503934	0.861231
Nudf	Q93K97	ADPP_ECOLI	ADP-ribose pyrophosphatase	17.8307	19.2859	0.667478	1.16877	-1.87262	0.152636	0.346976	-1.45517	0.816343
Nudj	P0AEI6	NUDJ_ECOLI	Phosphatase NudJ	16.2111	17.355	2.03698	2.84686	-0.565992	0.604601	0.732792	-1.1439	0.218531
Nudk	P37128	NUDK_ECOLI	GDP-mannose pyrophosphatase NudK	18.563	19.341	0.299745	0.569585	-2.09361	0.126473	0.321218	-0.777998	0.898001
Nuoa	P0AFC3	NUOA_ECOLI	NADH-quinone oxidoreductase subunit A	20.6922	18.9247	0.145886	0.349408	8.08548	0.00592439	0.0566563	1.76756	2.22736
Nuob	P0AFC7	NUOB_ECOLI	NADH-quinone oxidoreductase subunit B	22.9445	20.5546	0.212967	0.560731	6.90114	0.0101354	0.0746256	2.38987	1.99416
Nuoc	P33599	NUOCD_ECOLI	NADH-quinone oxidoreductase subunit C/D	24.857	23.0123	0.0547455	0.183454	16.6889	0.00169172	0.0327329	1.84467	2.77167
Nuoe	P0AFD1	NUOE_ECOLI	NADH-quinone oxidoreductase subunit E	20.7157	17.2602	0.397131	1.74704	3.34066	0.0690866	0.222791	3.45553	1.16061
Nuof	P31979	NUOF_ECOLI	NADH-quinone oxidoreductase subunit F	24.151	21.4329	0.030692	0.982124	4.79138	0.0407488	0.164791	2.71818	1.38989
Nuog	P33602	NUOG_ECOLI	NADH-quinone oxidoreductase subunit G	25.0223	22.9608	0.065495	0.185759	18.1279	0.00104314	0.0239202	2.06149	2.98166
Nuoh	P0AFD4	NUOH_ECOLI	NADH-quinone oxidoreductase subunit H	21.2293	20.171	0.115131	0.272366	6.19886	0.0115311	0.0799488	1.05828	1.93813
Nuoi	P0AFD6	NUOI_ECOLI	NADH-quinone oxidoreductase subunit I	22.6893	19.802	0.0827359	1.09911	4.53723	0.0443557	0.168127	2.88734	1.35305
Nuoj	P0AFE0	NUOJ_ECOLI	NADH-quinone oxidoreductase subunit J	18.8441	17.2356	0.214183	0.29003	7.72705	0.00210403	0.0365623	1.60846	2.67695
Nuok	P0AFE4	NUOK_ECOLI	NADH-quinone oxidoreductase subunit K	19.5483	16.7049	0.100081	3.1157	1.57988	0.254658	0.461603	2.84343	0.594042
Nuol	P33607	NUOL_ECOLI	NADH-quinone oxidoreductase subunit L	21.2795	20.1204	0.423813	0.518842	2.99697	0.0421078	0.165471	1.15919	1.37564
Nuon	P0AFF0	NUON_ECOLI	NADH-quinone oxidoreductase subunit N	13.8785	12.9971	0.892864	0.0992598	1.69926	0.228361	0.432301	0.881356	0.641378
Nupc	P0AFF2	NUPC_ECOLI	Nucleoside permease NupC	20.7824	20.7417	0.213333	0.239917	0.219767	0.836952	0.89706	0.0407353	0.0772995
Nupx;psut	P33021;P33024	NUPX_ECOLI;PSUT_ECOLI	Nucleoside permease NupX	20.2767	20.2002	0.255383	0.431844	0.263873	0.807753	0.874142	0.0764334	0.0927216
Nusa	P0AFF6	NUSA_ECOLI	Transcription termination/antitermination protein NusA	24.817	24.6491	0.161991	0.156272	1.29237	0.265918	0.474771	0.167944	0.575253
Nusb	P0A780	NUSB_ECOLI	N utilization substance protein B	21.4966	21.5658	0.218528	0.210775	-0.394805	0.713159	0.811694	-0.0692057	0.146814
Nusg	P0AFG0	NUSG_ECOLI	Transcription termination/antitermination protein NusG	23.4513	23.565	0.30911	0.0237062	-0.635122	0.589658	0.722526	-0.11368	0.2294
Obge	P42641	OBG_ECOLI	GTPase ObgE/CgtA	20.0313	20.5014	0.590345	0.590064	-0.975479	0.384558	0.587068	-0.470083	0.415038
Ogt	P0AFH0	OGT_ECOLI	Methylated-DNA--protein-cysteine methyltransferase	17.2311	17.207	0.171168	0.0689537	0.226024	0.83757	0.89706	0.024081	0.0769791
Ompa	P0A910	OMPA_ECOLI	Outer membrane protein A	26.3267	27.1665	0.143669	0.195194	-6.00161	0.00506421	0.0526678	-0.839809	2.29549
Ompf	P02931	OMPF_ECOLI	Outer membrane protein F	25.5086	27.669	0.909424	0.01622	-4.11396	0.0542575	0.192095	-2.1604	1.26554
Ompr	P0AA16	OMPR_ECOLI	Transcriptional regulatory protein OmpR	22.7022	22.9017	0.139596	0.226276	-1.29954	0.276415	0.485449	-0.199482	0.558438
Ompx	P0A917	OMPX_ECOLI	Outer membrane protein X	22.5185	25.9329	1.15168	0.182207	-5.07204	0.0331907	0.147278	-3.41446	1.47898
Oppa	P23843	OPPA_ECOLI	Periplasmic oligopeptide-binding protein	24.909	24.0636	0.195147	0.16006	5.80127	0.00492754	0.0522256	0.845352	2.30737
Oppd	P76027	OPPD_ECOLI	Oligopeptide transport ATP-binding protein OppD	19.2174	14.9971	0.287901	0.0992598	24.0031	0.000546774	0.0178261	4.22026	3.26219
Oppf	P77737	OPPF_ECOLI	Oligopeptide transport ATP-binding protein OppF	20.3937	16.5042	0.0904502	0.791694	8.45421	0.012675	0.0860867	3.88943	1.89705
Orn	P0A784	ORN_ECOLI	Oligoribonuclease	20.4701	20.8818	0.174185	0.492847	-1.36413	0.282644	0.491718	-0.411685	0.548761
Osmc	P0C0L2	OSMC_ECOLI	Peroxiredoxin OsmC	17.3518	22.913	1.24686	0.555858	-7.0559	0.0076104	0.0641874	-5.56125	2.11859
Osme	P0ADB1	OSME_ECOLI	Osmotically-inducible lipoprotein E	20.9937	22.4894	0.221463	0.328254	-6.54214	0.00440587	0.0509123	-1.49564	2.35597
Osmf	P33362	OSMF_ECOLI	Putative osmoprotectant uptake system substrate-binding protein OsmF	14.1177	17.6743	0.308389	0.744263	-7.64651	0.00692758	0.0616443	-3.55661	2.15942
Osmy	P0AFH8	OSMY_ECOLI	Osmotically-inducible protein Y	18.3318	22.3559	1.26481	0.527482	-5.08609	0.0192889	0.108831	-4.0241	1.71469
Otsa	P31677	OTSA_ECOLI	Alpha,alpha-trehalose-phosphate synthase [UDP-forming]	15.8133	19.4977	2.22122	0.3295	-2.84191	0.0997451	0.27754	-3.68441	1.00111
Oxyr	P0ACQ4	OXYR_ECOLI	Hydrogen peroxide-inducible genes activator	21.8849	21.8643	0.202806	0.101215	0.156829	0.885535	0.931678	0.0205229	0.0527945
Pabb	P05041	PABB_ECOLI	Aminodeoxychorismate synthase component 1	16.5841	18.5538	2.3615	0.339257	-1.43002	0.284338	0.491829	-1.96972	0.546164
Pal	P0A912	PAL_ECOLI	Peptidoglycan-associated lipoprotein	24.3924	23.9517	0.142406	0.609251	1.21997	0.336269	0.542323	0.440693	0.473314
Panb	P31057	PANB_ECOLI	3-methyl-2-oxobutanoate hydroxymethyltransferase	20.8548	21.1306	0.175359	0.153531	-2.04986	0.110929	0.291604	-0.275838	0.954957
Panc	P31663	PANC_ECOLI	Pantothenate synthetase	23.1326	23.2303	0.275171	0.199384	-0.498032	0.646986	0.768665	-0.0977097	0.189105
Parc	P0AFI2	PARC_ECOLI	DNA topoisomerase 4 subunit A	20.4165	19.8628	0.328626	0.413053	1.81694	0.146996	0.339569	0.553701	0.832695
Pare	P20083	PARE_ECOLI	DNA topoisomerase 4 subunit B	22.1774	21.8608	0.0138301	0.127872	4.26405	0.0488053	0.179596	0.316637	1.31153
Pbpg	P0AFI5	PBP7_ECOLI	D-alanyl-D-alanine endopeptidase	15.4396	18.7539	0.308389	1.19063	-4.66737	0.0335921	0.148519	-3.31428	1.47376
Pcka	P22259	PCKA_ECOLI	Phosphoenolpyruvate carboxykinase [ATP]	24.0264	22.5477	0.0768488	0.183769	12.8573	0.00174959	0.0330831	1.47862	2.75706
Pcm	P0A7A5	PIMT_ECOLI	Protein-L-isoaspartate O-methyltransferase	13.9663	14.9703	1.42935	1.00886	-0.994022	0.382296	0.586718	-1.00405	0.4176
Pcnb	P0ABF1	PCNB_ECOLI	Poly(A) polymerase I	22.0699	22.062	0.322673	0.186148	0.0368042	0.972819	0.984055	0.00791559	0.0119679
Pdhr	P0ACL9	PDHR_ECOLI	Pyruvate dehydrogenase complex repressor	18.2291	19.4531	0.342177	0.259519	-4.93631	0.00937444	0.0718851	-1.22395	2.02805
Pdxa	P19624	PDXA_ECOLI	4-hydroxythreonine-4-phosphate dehydrogenase	16.7582	16.2048	1.64708	0.968742	0.501601	0.648106	0.768673	0.553379	0.188354
Pdxb	P05459	PDXB_ECOLI	Erythronate-4-phosphate dehydrogenase	23.5987	23.8261	0.145015	0.0350259	-2.64002	0.105778	0.284585	-0.22739	0.975603
Pdxh	P0AFI7	PDXH_ECOLI	Pyridoxine/pyridoxamine 5'-phosphate oxidase	22.9581	23.03	0.198767	0.256332	-0.384127	0.721577	0.817915	-0.0719368	0.141717
Pdxj	P0A794	PDXJ_ECOLI	Pyridoxine 5'-phosphate synthase	21.7438	21.9237	0.163416	0.102011	-1.61798	0.194487	0.398538	-0.179955	0.71111
Pdxk	P40191	PDXK_ECOLI	Pyridoxine kinase	19.1819	19.585	0.31565	0.0439933	-2.19064	0.155093	0.34875	-0.403082	0.809408
Pdxy	P77150	PDXY_ECOLI	Pyridoxamine kinase	17.7917	17.3375	0.695837	0.148218	1.10556	0.37586	0.585062	0.454115	0.424974
Pepa	P68767	AMPA_ECOLI	Cytosol aminopeptidase	24.2965	24.5113	0.120115	0.163667	-1.83219	0.147278	0.339569	-0.21475	0.831861
Pepb	P37095	PEPB_ECOLI	Peptidase B	24.5	24.3354	0.131911	0.0838012	1.82418	0.154993	0.34875	0.164592	0.809687
Pepd	P15288	PEPD_ECOLI	Cytosol non-specific dipeptidase	24.2669	24.9056	0.0406561	0.0841072	-11.8421	0.00155165	0.0311078	-0.638704	2.80921
Pepn	P04825	AMPN_ECOLI	Aminopeptidase N	24.4005	25.0405	0.151544	0.136105	-5.44251	0.0057182	0.0556437	-0.640045	2.24274
Pepp	P15034	AMPP_ECOLI	Xaa-Pro aminopeptidase	22.7249	22.8366	0.0592182	0.0620448	-2.25428	0.0873758	0.254167	-0.11163	1.05861
Pepq	P21165	PEPQ_ECOLI	Xaa-Pro dipeptidase	23.6221	23.451	0.131094	0.0394794	2.16378	0.143229	0.335964	0.171035	0.843968
Pept	P29745	PEPT_ECOLI	Peptidase T	19.2728	20.7953	1.12872	0.535333	-2.11087	0.129804	0.322379	-1.52246	0.886712
Pfka	P0A796	K6PF1_ECOLI	6-phosphofructokinase isozyme 1	24.3465	24.9431	0.0676755	0.00821026	-15.1588	0.00382923	0.0477	-0.596636	2.41689
Pfkb	P06999	K6PF2_ECOLI	6-phosphofructokinase isozyme 2	22.7531	23.1468	0.135457	0.0516384	-4.70454	0.0254822	0.127379	-0.393752	1.59376
Pfla	P0A9N4	PFLA_ECOLI	Pyruvate formate-lyase 1-activating enzyme	20.7047	18.7012	0.195521	0.67234	4.95603	0.0277619	0.133596	2.00351	1.55655
Pflb	P09373	PFLB_ECOLI	Formate acetyltransferase 1	24.6585	26.6785	0.0848347	0.20378	-15.8509	0.00101564	0.0238688	-2.02005	2.99326
Pgi	P0A6T1	G6PI_ECOLI	Glucose-6-phosphate isomerase	23.9793	24.6275	0.169588	0.140693	-5.09539	0.0076588	0.0641874	-0.648235	2.11584
Pgk	P0A799	PGK_ECOLI	Phosphoglycerate kinase	26.14	26.0288	0.246774	0.199286	0.607006	0.577982	0.715876	0.111162	0.238086
Pgm	P36938	PGM_ECOLI	Phosphoglucomutase	23.7769	24.1485	0.0257814	0.0995676	-6.25805	0.0179373	0.106338	-0.37161	1.74624
Pgsa	P0ABF8	PGSA_ECOLI	CDP-diacylglycerol--glycerol-3-phosphate 3-phosphatidyltransferase	18.8684	19.5147	0.665767	0.342694	-1.49515	0.232036	0.435401	-0.646374	0.634444
Phea	P0A9J8	PHEA_ECOLI	P-protein	22.226	22.0011	0.0466265	0.198201	1.91295	0.183088	0.385224	0.224877	0.73734
Phes	P08312	SYFA_ECOLI	Phenylalanine--tRNA ligase alpha subunit	24.1365	23.5764	0.135477	0.308126	2.88176	0.0705326	0.226046	0.560019	1.15161
Phet	P07395	SYFB_ECOLI	Phenylalanine--tRNA ligase beta subunit	25.3525	25.1106	0.0363967	0.153052	2.66322	0.104462	0.284435	0.241898	0.981043
Phna	P0AFJ1	PHNA_ECOLI	Protein PhnA	19.7205	18.6427	0.274903	0.485359	3.3469	0.0408114	0.164791	1.07786	1.38922
Phnb	P16681	PHNB_ECOLI	Protein PhnB	13.1177	17.3595	0.308389	0.796005	-8.60663	0.00568634	0.0556437	-4.24184	2.24517
Phob	P0AFJ5	PHOB_ECOLI	Phosphate regulon transcriptional regulatory protein PhoB	19.732	19.9821	1.6794	0.398524	-0.25099	0.823132	0.885959	-0.250119	0.0845303
Phop	P23836	PHOP_ECOLI	Transcriptional regulatory protein PhoP	23.7752	23.4064	0.0752643	0.387761	1.61705	0.238596	0.441374	0.368773	0.622336
Phou	P0A9K7	PHOU_ECOLI	Phosphate-specific transport system accessory protein PhoU	20.8482	20.3886	0.103525	1.03968	0.761976	0.524324	0.689498	0.459646	0.2804
Phrb	P00914	PHR_ECOLI	Deoxyribodipyrimidine photo-lyase	14.2143	15.7258	2.19694	2.5249	-0.782234	0.478574	0.657052	-1.51153	0.320051
Pita	P0AFJ7	PITA_ECOLI	Low-affinity inorganic phosphate transporter 1	19.9727	19.5116	0.273675	0.78922	0.956021	0.422883	0.614942	0.461064	0.37378
Pldb	P07000	PLDB_ECOLI	Lysophospholipase L2	13.5293	14.1189	0.533696	0.997444	-0.902681	0.432074	0.622665	-0.589566	0.364442
Plig	P76002	PLIG_ECOLI	Inhibitor of g-type lysozyme	23.742	24.6276	0.0233594	0.187486	-8.1186	0.0135534	0.0889519	-0.885592	1.86795
Plsb	P0A7A7	PLSB_ECOLI	Glycerol-3-phosphate acyltransferase	22.3277	22.5405	0.157621	0.489512	-0.71647	0.536782	0.694021	-0.212727	0.270202
Plsc	P26647	PLSC_ECOLI	1-acyl-sn-glycerol-3-phosphate acyltransferase	19.9748	19.5587	0.312933	0.147056	2.08442	0.133486	0.326168	0.416105	0.874564
Plsx	P27247	PLSX_ECOLI	Phosphate acyltransferase	21.812	19.9317	0.0301542	3.16389	1.02928	0.411526	0.608692	1.88025	0.385603
Pmba	P0AFK0	PMBA_ECOLI	Protein PmbA	21.9711	22.6451	0.242233	0.0393395	-4.75718	0.0374713	0.158657	-0.674024	1.4263
Pmrd	P37590	PMRD_ECOLI	Signal transduction protein PmrD	18.1698	15.7321	0.949399	1.40767	2.48673	0.0765308	0.237444	2.43771	1.11616
Pnca	P21369	PNCA_ECOLI	Pyrazinamidase/nicotinamidase	19.0444	19.61	1.61001	1.30177	-0.473142	0.661798	0.777157	-0.565579	0.179275
Pncb	P18133	PNCB_ECOLI	Nicotinate phosphoribosyltransferase	22.2528	23.2413	0.178487	0.124673	-7.86395	0.00221754	0.0368999	-0.988493	2.65413
Pncc	P0A6G3	PNCC_ECOLI	Nicotinamide-nucleotide amidohydrolase PncC	14.9762	18.1478	1.78487	1.41694	-2.41054	0.0768088	0.237444	-3.17162	1.11459
Pnp	P05055	PNP_ECOLI	Polyribonucleotide nucleotidyltransferase	25.7201	25.4503	0.0608461	0.140009	3.06141	0.0621313	0.208431	0.269826	1.20669
Pnta	P07001	PNTA_ECOLI	NAD(P) transhydrogenase subunit alpha	24.5762	24.3664	0.132218	0.191579	1.56142	0.202225	0.40729	0.209843	0.694164
Pntb	P0AB67	PNTB_ECOLI	NAD(P) transhydrogenase subunit beta	23.6047	23.2057	0.0748992	0.232307	2.83123	0.0851946	0.252698	0.39898	1.06959
Pola	P00582	DPO1_ECOLI	DNA polymerase I	22.4652	22.9519	0.0171527	0.15185	-5.51667	0.0296159	0.138819	-0.486726	1.52847
Pota	P69874	POTA_ECOLI	Spermidine/putrescine import ATP-binding protein PotA	21.0991	20.4199	0.157907	0.463269	2.40378	0.114462	0.298068	0.679259	0.941337
Potc	P0AFK6	POTC_ECOLI	Spermidine/putrescine transport system permease protein PotC	17.6726	15.2662	0.129615	4.02606	1.03474	0.409317	0.607585	2.40644	0.38794
Potd	P0AFK9	POTD_ECOLI	Spermidine/putrescine-binding periplasmic protein	23.4402	23.6627	0.432055	0.32667	-0.711374	0.518868	0.684962	-0.222462	0.284943
Potf	P31133	POTF_ECOLI	Putrescine-binding periplasmic protein	22.0353	22.5361	0.620047	0.192839	-1.33591	0.294816	0.50161	-0.500828	0.530448
Potg	P31134	POTG_ECOLI	Putrescine transport ATP-binding protein PotG	20.5618	20.9818	0.606577	0.168353	-1.15569	0.353445	0.55853	-0.420032	0.451679
Poxb	P07003	POXB_ECOLI	Pyruvate dehydrogenase [ubiquinone]	19.7444	23.5931	0.987775	0.0954122	-6.71754	0.020449	0.1112	-3.84879	1.68933
Ppa	P0A7A9	IPYR_ECOLI	Inorganic pyrophosphatase	22.0357	23.4707	0.663723	0.410863	-3.184	0.0430795	0.166276	-1.43496	1.36573
Ppc	P00864	CAPP_ECOLI	Phosphoenolpyruvate carboxylase	26.0843	25.9238	0.104758	0.217649	1.15081	0.336345	0.542323	0.16049	0.473215
Ppia	P0AFL3	PPIA_ECOLI	Peptidyl-prolyl cis-trans isomerase A	22.277	21.717	0.372363	0.157708	2.39887	0.105716	0.284585	0.560065	0.97586
Ppib	P23869	PPIB_ECOLI	Peptidyl-prolyl cis-trans isomerase B	22.8096	23.1327	0.278467	0.249716	-1.49601	0.2098	0.412678	-0.323062	0.678194
Ppic	P0A9L5	PPIC_ECOLI	Peptidyl-prolyl cis-trans isomerase C	19.1842	20.4004	0.170844	0.78321	-2.62773	0.108818	0.288794	-1.21616	0.963297
Ppid	P0ADY1	PPID_ECOLI	Peptidyl-prolyl cis-trans isomerase D	23.7498	23.7392	0.155768	0.114301	0.0951246	0.92918	0.960942	0.0106109	0.0318999
Ppk	P0A7B1	PPK_ECOLI	Polyphosphate kinase	21.9987	22.7648	0.447139	0.470478	-2.04451	0.110558	0.291529	-0.766152	0.956411
Ppnk	P0A7B3	PPNK_ECOLI	Probable inorganic polyphosphate/ATP-NAD kinase	16.8984	19.0462	3.49768	0.130897	-1.06287	0.398937	0.599667	-2.14784	0.399096
Ppsa	P23538	PPSA_ECOLI	Phosphoenolpyruvate synthase	24.2698	24.9699	0.189056	0.111478	-5.52495	0.00949983	0.0719937	-0.700091	2.02228
Ppsr	P0A8A4	PSRP_ECOLI	Phosphoenolpyruvate synthase regulatory protein	20.6697	21.8621	0.165938	0.284475	-6.27068	0.00661577	0.0603304	-1.19232	2.17942
Ppx	P0AFL6	PPX_ECOLI	Exopolyphosphatase	21.1976	21.255	0.166119	0.215452	-0.36524	0.734557	0.826265	-0.0573691	0.133975
Pqib	P43671	PQIB_ECOLI	Paraquat-inducible protein B	20.4213	20.3538	0.140726	0.431192	0.257929	0.816776	0.881088	0.0675441	0.0878968
Pqql	P31828	PQQL_ECOLI	Probable zinc protease PqqL	16.6774	18.7236	1.94779	0.419831	-1.77869	0.206464	0.410942	-2.04617	0.685156
Prc	P23865	PRC_ECOLI	Tail-specific protease	22.481	22.3232	0.163952	0.345461	0.71505	0.528552	0.692528	0.157865	0.276913
Prfa	P0A7I0	RF1_ECOLI	Peptide chain release factor 1	20.9827	20.3858	0.171792	0.259739	3.31995	0.0363574	0.156327	0.596904	1.43941
Prfb	P07012	RF2_ECOLI	Peptide chain release factor 2	23.4093	23.4839	0.132695	0.117901	-0.727938	0.507499	0.678841	-0.0746017	0.294565
Prfc	P0A7I4	RF3_ECOLI	Peptide chain release factor 3	22.1018	21.3571	0.209427	0.115703	5.39109	0.0113252	0.0792977	0.744718	1.94595
Prkb	P0AEX5	KPPR_ECOLI	Probable phosphoribulokinase	20.1484	19.8877	0.218068	0.974297	0.452328	0.691764	0.798818	0.260735	0.160042
Prlc	P27298	OPDA_ECOLI	Oligopeptidase A	23.8593	24.1946	0.0670436	0.0425283	-7.31323	0.00346639	0.0457784	-0.335227	2.46012
Prma	P0A8T1	PRMA_ECOLI	Ribosomal protein L11 methyltransferase	19.8782	19.1081	0.124296	0.20146	5.63435	0.00830609	0.0670939	0.770044	2.0806
Prmb	P39199	PRMB_ECOLI	50S ribosomal protein L3 glutamine methyltransferase	21.1033	21.307	0.137998	0.0644331	-2.3172	0.108528	0.288483	-0.203752	0.964458
Prmc	P0ACC1	PRMC_ECOLI	Release factor glutamine methyltransferase	13.1177	16.6894	0.308389	3.14689	-1.95651	0.187148	0.388296	-3.57173	0.727816
Proa	P07004	PROA_ECOLI	Gamma-glutamyl phosphate reductase	23.6022	23.7053	0.0516223	0.493318	-0.360009	0.752649	0.839357	-0.103096	0.123408
Prob	P0A7B5	PROB_ECOLI	Glutamate 5-kinase	23.1962	22.7582	0.120417	0.075159	5.34373	0.00958965	0.0719937	0.437937	2.0182
Proc	P0A9L8	P5CR_ECOLI	Pyrroline-5-carboxylate reductase	21.8068	21.4297	0.118123	0.0827734	4.52805	0.0136315	0.0889519	0.377076	1.86546
Prop	P0C0L7	PROP_ECOLI	Proline/betaine transporter	19.5643	21.6433	0.518188	0.386151	-5.57207	0.00639333	0.0597183	-2.07899	2.19427
Proq	P45577	PROQ_ECOLI	ProP effector	22.857	22.4095	0.0188439	0.206216	3.74311	0.0629061	0.210008	0.447508	1.20131
Pros	P16659	SYP_ECOLI	Proline--tRNA ligase	25.2623	25.2052	0.0445904	0.0489463	1.49317	0.210283	0.412678	0.0570804	0.677196
Prpe	P77495	PRPE_ECOLI	Propionate--CoA ligase	28.9519	29.949	0.136405	0.23545	-6.3469	0.00645991	0.0597183	-0.997107	2.18977
Prr	P77674	ABDH_ECOLI	Gamma-aminobutyraldehyde dehydrogenase	19.1068	20.9399	0.341487	0.252843	-7.47263	0.00235395	0.0378702	-1.83317	2.6282
Prs	P0A717	KPRS_ECOLI	Ribose-phosphate pyrophosphokinase	24.6023	24.1501	0.0523805	0.00199923	14.9402	0.0043972	0.0509123	0.452148	2.35682
Psd	P0A8K1	PSD_ECOLI	Phosphatidylserine decarboxylase proenzyme	22.0177	22.3875	0.0906325	0.116502	-4.33969	0.0139319	0.089519	-0.369825	1.85599
Pspa	P0AFM6	PSPA_ECOLI	Phage shock protein A	23.2009	21.8623	0.0387195	0.193613	11.742	0.00538493	0.0549725	1.33854	2.26882
Pspb	P0AFM9	PSPB_ECOLI	Phage shock protein B	20.7671	20.4433	0.156905	0.166578	2.45041	0.0706394	0.226046	0.323749	1.15095
Pspe	P23857	PSPE_ECOLI	Thiosulfate sulfurtransferase PspE	16.2263	14.5821	1.74314	0.0992598	1.6311	0.243654	0.44603	1.6442	0.613226
Pssa	P23830	PSS_ECOLI	CDP-diacylglycerol--serine O-phosphatidyltransferase	22.1711	22.1453	0.0400043	0.0851524	0.47369	0.669718	0.782592	0.0257298	0.174108
Pstb	P0AAH0	PSTB_ECOLI	Phosphate import ATP-binding protein PstB	19.7088	19.0233	0.11948	0.174037	5.62438	0.00700995	0.0620455	0.685502	2.15429
Psts	P0AG82	PSTS_ECOLI	Phosphate-binding protein PstS	19.4663	19.35	1.11038	0.360228	0.17247	0.876464	0.926558	0.11624	0.0572658
Pta	P0A9M8	PTA_ECOLI	Phosphate acetyltransferase	24.9569	25.2119	0.0900549	0.188189	-2.11653	0.128671	0.322251	-0.254938	0.89052
Pth	P0A7D1	PTH_ECOLI	Peptidyl-tRNA hydrolase	20.4945	20.3002	0.449717	0.395765	0.561889	0.604641	0.732792	0.19434	0.218502
Ptra	P05458	PTRA_ECOLI	Protease 3	19.4634	19.9298	0.761437	1.68049	-0.437825	0.693192	0.799911	-0.466363	0.159147
Ptsg	P69786	PTGCB_ECOLI	PTS system glucose-specific EIICB component	22.6536	22.1957	0.0953215	0.243062	3.03773	0.0672421	0.218537	0.4579	1.17236
Ptsh	P0AA04	PTHP_ECOLI	Phosphocarrier protein HPr	24.1029	24.0813	0.355105	0.260624	0.084855	0.936801	0.964641	0.0215797	0.0283527
Ptsi	P08839	PT1_ECOLI	Phosphoenolpyruvate-protein phosphotransferase	25.8893	25.7875	0.0138787	0.0945849	1.8445	0.201164	0.406234	0.101804	0.69645
Ptsn	P69829	PTSN_ECOLI	Nitrogen regulatory protein	20.4588	20.5633	0.0354083	0.233936	-0.76477	0.52127	0.686944	-0.104469	0.282937
Ptsp	P37177	PT1P_ECOLI	Phosphoenolpyruvate-protein phosphotransferase PtsP	20.5222	21.6284	0.244532	0.0840355	-7.41029	0.00961685	0.0719937	-1.10624	2.01697
Pura	P0A7D4	PURA_ECOLI	Adenylosuccinate synthetase	25.6006	25.5235	0.031815	0.0143512	3.8271	0.0358613	0.154995	0.0771187	1.44537
Purb	P0AB89	PUR8_ECOLI	Adenylosuccinate lyase	24.1293	24.1634	0.0746734	0.0317928	-0.727394	0.524874	0.689498	-0.0340839	0.279945
Purc	P0A7D7	PUR7_ECOLI	Phosphoribosylaminoimidazole-succinocarboxamide synthase	24.8045	24.6021	0.133276	0.25089	1.23397	0.303885	0.511288	0.202397	0.517291
Purd	P15640	PUR2_ECOLI	Phosphoribosylamine--glycine ligase	23.0431	22.5419	0.303617	0.234571	2.26259	0.0906896	0.259936	0.501197	1.04244
Pure	P0AG18	PURE_ECOLI	N5-carboxyaminoimidazole ribonucleotide mutase	21.8241	21.646	0.165383	0.612736	0.48603	0.669536	0.782592	0.178093	0.174226
Purf	P0AG16	PUR1_ECOLI	Amidophosphoribosyltransferase	22.8913	21.4414	0.177315	0.444137	5.2512	0.0187002	0.106932	1.44987	1.72815
Purh	P15639	PUR9_ECOLI	Bifunctional purine biosynthesis protein PurH	25.5389	25.1594	0.0539329	0.171274	3.66109	0.0508932	0.184502	0.379551	1.29334
Purk	P09029	PURK_ECOLI	N5-carboxyaminoimidazole ribonucleotide synthase	22.2996	21.8857	0.117858	0.0533789	5.54107	0.0140344	0.089519	0.413911	1.8528
Purl	P15254	PUR4_ECOLI	Phosphoribosylformylglycinamidine synthase	25.578	25.4825	0.0604215	0.179572	0.873329	0.459677	0.640085	0.0955313	0.337548
Purm	P08178	PUR5_ECOLI	Phosphoribosylformylglycinamidine cyclo-ligase	24.0546	23.4377	0.0798009	0.073	9.87861	0.000612629	0.0192342	0.616845	3.2128
Purn	P08179	PUR3_ECOLI	Phosphoribosylglycinamide formyltransferase	19.9362	20.3149	0.876392	0.370182	-0.689467	0.545228	0.700045	-0.378705	0.263422
Purr	P0ACP7	PURR_ECOLI	HTH-type transcriptional repressor PurR	22.7797	22.4519	0.0870849	0.140617	3.43202	0.0351847	0.152865	0.327735	1.45365
Purt	P33221	PURT_ECOLI	Phosphoribosylglycinamide formyltransferase 2	24.1897	23.9785	0.0507046	0.0824923	3.77802	0.0271666	0.133084	0.211208	1.56596
Puru	P37051	PURU_ECOLI	Formyltetrahydrofolate deformylase	22.3918	22.4195	0.0950987	0.165358	-0.25113	0.817019	0.881088	-0.0276574	0.0877679
Puta	P09546	PUTA_ECOLI	Bifunctional protein PutA	17.1705	13.9971	2.34815	0.0992598	2.33869	0.14384	0.33662	3.1734	0.842121
Putp	P07117	PUTP_ECOLI	Sodium/proline symporter	19.8722	20.0495	0.193653	0.462514	-0.612441	0.588249	0.721863	-0.177298	0.230439
Puuc	P23883	PUUC_ECOLI	Aldehyde dehydrogenase PuuC	20.4733	19.043	0.896002	1.60448	1.34811	0.266712	0.475169	1.43035	0.573958
Puue	P50457	PUUE_ECOLI	4-aminobutyrate aminotransferase PuuE	18.5711	17.6793	0.34069	0.0390339	4.50435	0.0437553	0.167203	0.89179	1.35897
Pyka	P21599	KPYK2_ECOLI	Pyruvate kinase II	24.4373	24.2475	0.107923	0.0625974	2.63407	0.0727588	0.229571	0.189737	1.13811
Pykf	P0AD61	KPYK1_ECOLI	Pyruvate kinase I	25.3308	25.2558	0.031757	0.157084	0.810385	0.497202	0.670457	0.0749828	0.303467
Pyrb	P0A786	PYRB_ECOLI	Aspartate carbamoyltransferase catalytic chain	21.7437	22.0059	0.628588	0.269674	-0.66408	0.558706	0.708982	-0.262248	0.252817
Pyrc	P05020	PYRC_ECOLI	Dihydroorotase	21.5805	21.8352	0.335329	0.0370026	-1.30763	0.318467	0.523128	-0.254696	0.496936
Pyrd	P0A7E1	PYRD_ECOLI	Dihydroorotate dehydrogenase (quinone)	21.5533	21.2807	0.238233	0.395881	1.02172	0.376253	0.585125	0.27255	0.424521
Pyre	P0A7E3	PYRE_ECOLI	Orotate phosphoribosyltransferase	21.4747	20.26	0.134743	0.289872	6.58173	0.0085672	0.0678849	1.21469	2.06716
Pyrf	P08244	PYRF_ECOLI	Orotidine 5'-phosphate decarboxylase	21.857	21.8846	0.36583	0.228808	-0.110762	0.918102	0.953634	-0.0275931	0.0371092
Pyrg	P0A7E5	PYRG_ECOLI	CTP synthase	24.1483	24.3394	0.0833099	0.127777	-2.16918	0.106995	0.285703	-0.191033	0.970636
Pyrh	P0A7E9	PYRH_ECOLI	Uridylate kinase	22.1085	22.1381	0.155581	0.278063	-0.160572	0.882207	0.930287	-0.029539	0.0544293
Pyri	P0A7F3	PYRI_ECOLI	Aspartate carbamoyltransferase regulatory chain	17.9783	12.9971	1.03381	0.0992598	8.30735	0.0134289	0.0889519	4.9812	1.87196
Qmca	P0AA53	QMCA_ECOLI	Protein QmcA	17.3823	15.1479	0.661592	1.92402	1.90218	0.17287	0.377996	2.23443	0.762281
Qora	P28304	QOR1_ECOLI	Quinone oxidoreductase 1	20.3507	22.2717	0.698005	0.0695412	-4.74351	0.0401155	0.16401	-1.92107	1.39669
Qseb	P52076	QSEB_ECOLI	Transcriptional regulatory protein QseB	15.4719	18.4308	1.6306	1.38002	-2.39906	0.0761884	0.236967	-2.95883	1.11811
Qsec	P40719	QSEC_ECOLI	Sensor protein QseC	17.9936	18.3485	0.150166	0.167085	-2.73605	0.0527617	0.187999	-0.354869	1.27768
Quea	P0A7F9	QUEA_ECOLI	S-adenosylmethionine:tRNA ribosyltransferase-isomerase	21.4682	21.1426	0.155833	0.114672	2.91492	0.0481968	0.178122	0.325609	1.31698
Quec	P77756	QUEC_ECOLI	7-cyano-7-deazaguanine synthase	20.3183	20.5141	0.137946	0.0852975	-2.09052	0.118568	0.305886	-0.195754	0.926034
Quee	P64554	QUEE_ECOLI	7-carboxy-7-deazaguanine synthase	18.0574	18.1273	0.921768	1.18236	-0.0807544	0.939735	0.965925	-0.0698984	0.0269945
Quef	Q46920	QUEF_ECOLI	NADPH-dependent 7-cyano-7-deazaguanine reductase	20.8467	21.0469	0.154214	0.188557	-1.42316	0.230444	0.434268	-0.200149	0.637435
Rada	P24554	RADA_ECOLI	DNA repair protein RadA	19.9239	20.5237	0.44122	0.33325	-1.87867	0.138811	0.331393	-0.599734	0.857577
Raia	P0AD49	RAIA_ECOLI	Ribosome-associated inhibitor A	22.249	19.8342	0.215017	0.39866	9.23426	0.00243765	0.0382665	2.41485	2.61303
Rapa	P60240	RAPA_ECOLI	RNA polymerase-associated protein RapA	20.5159	19.9451	0.551441	0.22239	1.66288	0.207396	0.41171	0.570851	0.683201
Rara	P0AAZ4	RARA_ECOLI	Replication-associated recombination protein A	19.0436	18.9003	0.171803	0.314146	0.693328	0.536507	0.694021	0.143327	0.270424
Ratb	P52119	RATB_ECOLI	UPF0125 protein RatB	17.8187	16.7921	0.177637	2.32839	0.761433	0.525138	0.689498	1.02657	0.279727
Rava	P31473	RAVA_ECOLI	ATPase RavA	17.6027	17.6377	0.171941	0.144157	-0.269912	0.800966	0.871686	-0.0349655	0.0963858
Rbfa	P0A7G2	RBFA_ECOLI	Ribosome-binding factor A	22.1751	22.4841	0.595448	0.300856	-0.802258	0.481819	0.660183	-0.309008	0.317116
Rbsb	P02925	RBSB_ECOLI	D-ribose-binding periplasmic protein	21.6675	20.1754	0.431523	1.20674	2.01662	0.155013	0.34875	1.49213	0.809631
Rcsf	P69411	RCSF_ECOLI	Outer membrane lipoprotein RcsF	19.8881	20.1655	0.41888	0.0316923	-1.14403	0.369927	0.57799	-0.277465	0.431884
Rdgb	P52061	RDGB_ECOLI	dITP/XTP pyrophosphatase	18.5213	19.3375	0.548194	0.203791	-2.41725	0.109832	0.290095	-0.816213	0.959273
Rdgc	P36767	RDGC_ECOLI	Recombination-associated protein RdgC	19.8498	20.7167	0.346879	0.137868	-4.02246	0.035502	0.153842	-0.866877	1.44975
Rdoa	P0C0K3	RDOA_ECOLI	Protein RdoA	18.728	14.9304	0.173448	1.59418	4.10177	0.0524818	0.187496	3.79754	1.27999
Reca	P0A7G6	RECA_ECOLI	Protein RecA	23.4331	22.8449	0.0577089	0.0462557	13.7769	0.000213771	0.012266	0.588274	3.67005
Recc	P07648	RECC_ECOLI	RecBCD enzyme subunit RecC	17.3688	20.4171	2.27791	0.37301	-2.28733	0.142988	0.335964	-3.04825	0.844701
Recg	P24230	RECG_ECOLI	ATP-dependent DNA helicase RecG	18.3132	18.3895	0.758874	0.563794	-0.139767	0.896132	0.93902	-0.0762873	0.0476278
Rela	P0AG20	RELA_ECOLI	GTP pyrophosphokinase	21.3978	21.1616	0.162569	0.241595	1.40482	0.242251	0.443948	0.236183	0.615735
Rep	P09980	REP_ECOLI	ATP-dependent DNA helicase Rep	16.4319	18.3817	1.57794	0.238667	-2.11617	0.162975	0.360626	-1.94981	0.787878
Rfaf	P37692	RFAF_ECOLI	ADP-heptose--LPS heptosyltransferase 2	18.0507	16.2965	0.228297	2.94075	1.03009	0.410137	0.607718	1.7542	0.387071
Rfbb	P37759	RMLB1_ECOLI	dTDP-glucose 4,6-dehydratase 1	21.0394	20.1834	0.196958	0.528333	2.62941	0.0930017	0.264538	0.855977	1.03151
Rfbd	P37760	RMLD_ECOLI	dTDP-4-dehydrorhamnose reductase	18.3964	17.193	1.40138	0.0822069	1.48475	0.275092	0.485421	1.20336	0.560523
Rffa	P27833	RFFA_ECOLI	dTDP-4-amino-4,6-dideoxygalactose transaminase	20.9409	20.7762	0.232474	0.410748	0.604262	0.586284	0.721241	0.164658	0.231892
Rffg	P27830	RMLB2_ECOLI	dTDP-glucose 4,6-dehydratase 2	18.044	18.7304	1.48025	0.210216	-0.795182	0.507073	0.678817	-0.686398	0.294929
Rhlb	P0A8J8	RHLB_ECOLI	ATP-dependent RNA helicase RhlB	22.9504	22.8728	0.100715	0.177808	0.658164	0.555187	0.707374	0.0776515	0.255561
Rhle	P25888	RHLE_ECOLI	ATP-dependent RNA helicase RhlE	20.0106	19.5945	0.204854	0.965937	0.729911	0.53586	0.694021	0.416113	0.270949
Rhmt	P76470	RHMT_ECOLI	Inner membrane transport protein RhmT	13.1177	12.9971	0.308389	0.0992598	0.644587	0.5752	0.714278	0.120566	0.240181
Rho	P0AG30	RHO_ECOLI	Transcription termination factor Rho	25.5848	25.4841	0.0519872	0.0715556	1.97134	0.12672	0.321218	0.100666	0.897154
Riba	P0A7I7	RIBA_ECOLI	GTP cyclohydrolase-2	18.9819	19.6328	0.453232	0.387877	-1.88993	0.133462	0.326168	-0.650923	0.874643
Ribb	P0A7J0	RIBB_ECOLI	3,4-dihydroxy-2-butanone 4-phosphate synthase	18.4893	18.0987	0.0608026	0.955387	0.706647	0.552506	0.705039	0.39057	0.257663
Ribc	P0AFU8	RISA_ECOLI	Riboflavin synthase	21.5943	21.7727	0.199781	0.179112	-1.1518	0.314263	0.521237	-0.178429	0.502707
Ribd	P25539	RIBD_ECOLI	Riboflavin biosynthesis protein RibD	20.277	20.3278	0.306759	0.0877026	-0.275547	0.805498	0.873545	-0.0507568	0.0939355
Ribe	P61714	RISB_ECOLI	6,7-dimethyl-8-ribityllumazine synthase	23.5194	22.974	0.0939232	0.194559	4.37218	0.0239984	0.123632	0.545355	1.61982
Ribf	P0AG40	RIBF_ECOLI	Riboflavin biosynthesis protein RibF	20.8786	21.4673	0.427871	0.158899	-2.23391	0.127541	0.322047	-0.588672	0.894349
Rida	P0AF93	RIDA_ECOLI	Enamine/imine deaminase	21.3123	22.2955	0.359948	0.576438	-2.50602	0.0783766	0.240477	-0.983266	1.10581
Riha	P41409	RIHA_ECOLI	Pyrimidine-specific ribonucleoside hydrolase RihA	19.8747	14.5821	0.526207	0.0992598	17.1193	0.00249364	0.0387796	5.29267	2.60317
Rihc	P22564	RIHC_ECOLI	Non-specific ribonucleoside hydrolase RihC	17.9285	17.089	0.0883938	3.35983	0.432627	0.707417	0.809036	0.8395	0.150324
Rimj	P0A948	RIMJ_ECOLI	Ribosomal-protein-alanine acetyltransferase	20.6257	20.8288	0.194035	0.139082	-1.47346	0.221689	0.424963	-0.203091	0.654256
Rimm	P0A7X6	RIMM_ECOLI	Ribosome maturation factor RimM	20.1532	19.4955	0.279411	0.426749	2.23312	0.100056	0.27754	0.657648	0.999758
Rimo	P0AEI4	RIMO_ECOLI	Ribosomal protein S12 methylthiotransferase RimO	21.4513	18.8019	0.381936	1.1476	3.79418	0.0457552	0.171094	2.64948	1.33956
Rimp	P0A8A8	RIMP_ECOLI	Ribosome maturation factor RimP	21.7432	21.3048	0.546215	0.380014	1.14106	0.324588	0.530366	0.438361	0.488668
Rlma	P36999	RLMA_ECOLI	23S rRNA (guanine(745)-N(1))-methyltransferase	16.5784	17.3584	2.35578	2.82645	-0.36714	0.732685	0.825449	-0.779931	0.135083
Rlmb	P63177	RLMB_ECOLI	23S rRNA (guanosine-2'-O-)-methyltransferase RlmB	20.53	20.2217	0.103626	0.329101	1.54731	0.241565	0.443179	0.308228	0.616967
Rlme	P0C0R7	RLME_ECOLI	Ribosomal RNA large subunit methyltransferase E	20.5055	19.5711	0.619912	0.401013	2.19212	0.104876	0.284585	0.934422	0.979325
Rlmg	P42596	RLMG_ECOLI	Ribosomal RNA large subunit methyltransferase G	19.4242	15.212	0.455003	1.1872	5.73827	0.01575	0.0980908	4.21215	1.80272
Rlmh	P0A8I8	RLMH_ECOLI	Ribosomal RNA large subunit methyltransferase H	20.1598	20.4705	0.518119	0.35942	-0.853418	0.446986	0.631933	-0.3107	0.349706
Rlmi	P75876	RLMI_ECOLI	Ribosomal RNA large subunit methyltransferase I	21.1429	20.8842	0.0765395	0.230217	1.84686	0.182796	0.385224	0.258687	0.738032
Rlmj	P37634	RLMJ_ECOLI	Ribosomal RNA large subunit methyltransferase J	20.0927	20.0254	0.295333	0.315323	0.269764	0.800741	0.871686	0.0672879	0.0965078
Rlml	P75864	RLMKL_ECOLI	Ribosomal RNA large subunit methyltransferase K/L	20.5681	21.0763	0.0608861	0.0901324	-8.09225	0.00216502	0.0367612	-0.508181	2.66454
Rlmm	P0ADR6	RLMM_ECOLI	Ribosomal RNA large subunit methyltransferase M	20.3718	20.5091	0.036718	0.155852	-1.48432	0.26402	0.472906	-0.137217	0.578363
Rlpa	P10100	RLPA_ECOLI	Rare lipoprotein A	18.8102	18.1919	0.280577	0.761533	1.31966	0.293542	0.500465	0.618343	0.53233
Rlub	P37765	RLUB_ECOLI	Ribosomal large subunit pseudouridine synthase B	19.8903	19.1723	0.373836	0.19931	2.93553	0.0594573	0.20274	0.71801	1.22579
Rluc	P0AA39	RLUC_ECOLI	Ribosomal large subunit pseudouridine synthase C	17.7368	17.712	0.373137	0.431142	0.0755213	0.943497	0.966736	0.0248615	0.0252594
Rlud	P33643	RLUD_ECOLI	Ribosomal large subunit pseudouridine synthase D	19.7489	20.5309	0.173665	0.177467	-5.45479	0.00549654	0.0550978	-0.781984	2.25991
Rluf	P32684	RLUF_ECOLI	Ribosomal large subunit pseudouridine synthase F	19.4072	19.5198	0.441443	0.118352	-0.426799	0.706413	0.809036	-0.112619	0.150941
Rmf	P0AFW2	RMF_ECOLI	Ribosome modulation factor	16.5299	21.5389	2.0554	0.491153	-4.1054	0.0452565	0.170236	-5.00898	1.34432
Rmla1	P37744	RMLA1_ECOLI	Glucose-1-phosphate thymidylyltransferase 1	21.7875	21.9792	0.323551	0.30278	-0.74922	0.495552	0.670457	-0.19168	0.304911
Rmla2	P61887	RMLA2_ECOLI	Glucose-1-phosphate thymidylyltransferase 2	18.2557	18.4198	1.01401	0.0793076	-0.279513	0.805824	0.873545	-0.164137	0.0937597
Rna	P21338	RNI_ECOLI	Ribonuclease I	18.5254	19.6464	0.714384	0.111346	-2.68552	0.109578	0.289886	-1.12101	0.960276
Rnb	P30850	RNB_ECOLI	Exoribonuclease 2	23.8238	23.306	0.0816945	0.09038	7.36099	0.00188724	0.0341344	0.517761	2.72417
Rnc	P0A7Y0	RNC_ECOLI	Ribonuclease 3	19.7131	20.1464	0.16549	0.606254	-1.19436	0.341068	0.545185	-0.433345	0.467158
Rne	P21513	RNE_ECOLI	Ribonuclease E	24.6627	24.5775	0.1555	0.286498	0.452339	0.680952	0.791313	0.0851316	0.166884
Rng	P0A9J0	RNG_ECOLI	Ribonuclease G	21.6208	21.9008	0.100457	0.115186	-3.1733	0.0346266	0.150834	-0.280015	1.46059
Rnk	P0AFW4	RNK_ECOLI	Regulator of nucleoside diphosphate kinase	14.7724	16.748	1.43245	3.16906	-0.983952	0.402734	0.60211	-1.97567	0.394982
Rnpa	P0A7Y8	RNPA_ECOLI	Ribonuclease P protein component	18.6409	16.8432	0.468055	3.47112	0.888973	0.464967	0.644754	1.79767	0.332578
Rnr	P21499	RNR_ECOLI	Ribonuclease R	23.3813	23.6909	0.0415776	0.116033	-4.3501	0.0321611	0.14503	-0.309565	1.49267
Rnt	P30014	RNT_ECOLI	Ribonuclease T	17.843	17.4117	0.428588	0.114178	1.68402	0.218576	0.42122	0.431238	0.660397
Rob	P0ACI0	ROB_ECOLI	Right origin-binding protein	20.8922	21.3157	0.224029	0.0986551	-2.99632	0.0646373	0.212562	-0.423467	1.18952
Rodz	P27434	RODZ_ECOLI	Cytoskeleton protein RodZ	23.1951	23.5563	0.0622171	0.0459964	-8.08556	0.00179031	0.0331995	-0.361194	2.74707
Rof	P0AFW8	ROF_ECOLI	Protein rof	18.0777	18.8541	1.09146	1.08102	-0.875469	0.430746	0.621649	-0.776473	0.365779
Rpe	P0AG07	RPE_ECOLI	Ribulose-phosphate 3-epimerase	22.0572	22.5442	0.545893	0.48862	-1.15122	0.314496	0.521237	-0.48695	0.502384
Rph	P0CG19	RNPH_ECOLI	Inactive ribonuclease PH	21.8634	21.1881	0.157198	0.271286	3.73043	0.0299296	0.139183	0.675292	1.5239
Rpia	P0A7Z0	RPIA_ECOLI	Ribose-5-phosphate isomerase A	21.8055	22.7452	0.86691	0.399191	-1.70536	0.192753	0.397244	-0.939696	0.715
Rpla	P0A7L0	RL1_ECOLI	50S ribosomal protein L1	25.8016	25.7116	0.125211	0.119087	0.90172	0.418312	0.61382	0.0899605	0.378499
Rplb	P60422	RL2_ECOLI	50S ribosomal protein L2	25.6352	25.638	0.142795	0.137041	-0.0247129	0.98147	0.988599	-0.00282386	0.00812316
Rplc	P60438	RL3_ECOLI	50S ribosomal protein L3	24.642	24.5092	0.0460442	0.162122	1.36558	0.289348	0.496878	0.132875	0.538579
Rpld	P60723	RL4_ECOLI	50S ribosomal protein L4	25.6079	25.4728	0.0298997	0.172682	1.33539	0.307059	0.51403	0.135117	0.512778
Rple	P62399	RL5_ECOLI	50S ribosomal protein L5	25.771	25.9314	0.0684423	0.202115	-1.30182	0.301765	0.509809	-0.160384	0.520331
Rplf	P0AG55	RL6_ECOLI	50S ribosomal protein L6	25.616	25.6168	0.130643	0.230753	-0.00533853	0.99606	0.998291	-0.000817304	0.0017147
Rpli	P0A7R1	RL9_ECOLI	50S ribosomal protein L9	25.7464	25.8486	0.25647	0.192961	-0.551722	0.612633	0.739783	-0.102235	0.2128
Rplj	P0A7J3	RL10_ECOLI	50S ribosomal protein L10	25.4185	25.2026	0.0309551	0.279242	1.3308	0.312007	0.518661	0.215866	0.505835
Rplk	P0A7J7	RL11_ECOLI	50S ribosomal protein L11	24.9887	24.8098	0.0992738	0.174705	1.54171	0.216019	0.41799	0.178859	0.665507
Rpll	P0A7K2	RL7_ECOLI	50S ribosomal protein L7/L12	25.2981	24.7934	0.0598871	0.319777	2.68713	0.107138	0.285703	0.504732	0.970055
Rplm	P0AA10	RL13_ECOLI	50S ribosomal protein L13	24.6346	24.6152	0.103591	0.0292278	0.311871	0.781017	0.861095	0.0193807	0.107339
Rpln	P0ADY3	RL14_ECOLI	50S ribosomal protein L14	24.4988	24.5383	0.119658	0.117811	-0.407701	0.704376	0.80889	-0.0395262	0.152196
Rplo	P02413	RL15_ECOLI	50S ribosomal protein L15	25.3616	25.4032	0.0686321	0.220152	-0.312877	0.779665	0.860891	-0.0416558	0.108092
Rplp	P0ADY7	RL16_ECOLI	50S ribosomal protein L16	24.2728	24.2281	0.0513236	0.134815	0.537485	0.63396	0.758138	0.0447645	0.197938
Rplq	P0AG44	RL17_ECOLI	50S ribosomal protein L17	24.7861	24.8934	0.135791	0.132995	-0.977699	0.383605	0.587068	-0.10729	0.416116
Rplr	P0C018	RL18_ECOLI	50S ribosomal protein L18	24.1802	23.9024	0.0936095	0.270662	1.68039	0.210555	0.412678	0.27785	0.676635
Rpls	P0A7K6	RL19_ECOLI	50S ribosomal protein L19	24.7467	24.6837	0.0181335	0.0942971	1.13655	0.366599	0.574407	0.0630101	0.435809
Rplt	P0A7L3	RL20_ECOLI	50S ribosomal protein L20	24.4251	24.4058	0.108879	0.105069	0.220857	0.836032	0.89706	0.0192936	0.077777
Rplu	P0AG48	RL21_ECOLI	50S ribosomal protein L21	23.6137	23.6297	0.293331	0.154602	-0.0839077	0.938364	0.965639	-0.0160631	0.0276286
Rplv	P61175	RL22_ECOLI	50S ribosomal protein L22	25.0965	25.2772	0.0901608	0.0277926	-3.31724	0.0631058	0.210016	-0.180695	1.19993
Rplw	P0ADZ0	RL23_ECOLI	50S ribosomal protein L23	21.1421	21.3952	0.168071	0.0217153	-2.58728	0.118563	0.305886	-0.253146	0.92605
Rplx	P60624	RL24_ECOLI	50S ribosomal protein L24	24.5735	24.6258	0.242771	0.13218	-0.327848	0.76399	0.848085	-0.0523221	0.116912
Rply	P68919	RL25_ECOLI	50S ribosomal protein L25	24.6971	24.7245	0.269083	0.22551	-0.135443	0.898994	0.940834	-0.0274542	0.0462432
Rpma	P0A7L8	RL27_ECOLI	50S ribosomal protein L27	21.8697	22.0461	0.0903299	0.0745784	-2.60807	0.0616882	0.207792	-0.176384	1.2098
Rpmb	P0A7M2	RL28_ECOLI	50S ribosomal protein L28	23.4144	23.4005	0.112315	0.116454	0.148789	0.888929	0.933241	0.0138983	0.0511329
Rpmc	P0A7M6	RL29_ECOLI	50S ribosomal protein L29	23.6676	23.3468	0.0938507	0.253762	2.05366	0.148744	0.341393	0.320799	0.827561
Rpmd	P0AG51	RL30_ECOLI	50S ribosomal protein L30	23.3439	23.4454	0.0753578	0.182971	-0.888167	0.447391	0.631969	-0.101471	0.349313
Rpme	P0A7M9	RL31_ECOLI	50S ribosomal protein L31	20.5892	20.2549	0.125463	0.0585997	4.18156	0.0278592	0.133596	0.334307	1.55503
Rpmf	P0A7N4	RL32_ECOLI	50S ribosomal protein L32	22.0233	22.6148	0.290076	0.173559	-3.03088	0.0503513	0.183413	-0.591519	1.29799
Rpmg	P0A7N9	RL33_ECOLI	50S ribosomal protein L33	21.2732	22.1459	0.633398	0.0914905	-2.36194	0.13699	0.32985	-0.872708	0.863312
Rpmh	P0A7P5	RL34_ECOLI	50S ribosomal protein L34	20.5599	21.0794	0.409694	0.147398	-2.06644	0.148283	0.341277	-0.519462	0.828908
Rpmi	P0A7Q1	RL35_ECOLI	50S ribosomal protein L35	20.3357	20.2599	0.0166239	0.0749193	1.71091	0.217936	0.420703	0.0758048	0.66167
Rpoa	P0A7Z4	RPOA_ECOLI	DNA-directed RNA polymerase subunit alpha	25.7377	25.8096	0.0120513	0.0628144	-1.94753	0.182042	0.385224	-0.0719172	0.739828
Rpob	P0A8V2	RPOB_ECOLI	DNA-directed RNA polymerase subunit beta	26.3585	26.2982	0.0881476	0.162097	0.56671	0.609498	0.736532	0.0603712	0.215028
Rpoc	P0A8T7	RPOC_ECOLI	DNA-directed RNA polymerase subunit beta'	26.9444	26.6641	0.143561	0.540672	0.867936	0.467049	0.646181	0.28032	0.330637
Rpod	P00579	RPOD_ECOLI	RNA polymerase sigma factor RpoD	23.0914	23.3937	0.116005	0.259425	-1.84262	0.170235	0.373216	-0.302321	0.768952
Rpoe	P0AGB6	RPOE_ECOLI	ECF RNA polymerase sigma-E factor	19.4329	18.866	0.667297	2.36655	0.399298	0.72354	0.817915	0.566846	0.140537
Rpon	P24255	RP54_ECOLI	RNA polymerase sigma-54 factor	20.5148	20.9951	0.389608	0.436821	-1.42152	0.2291	0.433206	-0.480386	0.639976
Rpoz	P0A800	RPOZ_ECOLI	DNA-directed RNA polymerase subunit omega	22.1126	22.3945	0.178796	0.422588	-1.06429	0.373178	0.581975	-0.281952	0.428084
Rpsa	P0AG67	RS1_ECOLI	30S ribosomal protein S1	26.4394	26.3697	0.147455	0.19912	0.487177	0.653669	0.773067	0.0696917	0.184642
Rpsb	P0A7V0	RS2_ECOLI	30S ribosomal protein S2	25.2126	25.3378	0.0565753	0.0964169	-1.93951	0.141177	0.333713	-0.125179	0.850235
Rpsc	P0A7V3	RS3_ECOLI	30S ribosomal protein S3	25.7691	25.8001	0.0536999	0.110038	-0.438714	0.691473	0.798818	-0.0310137	0.160225
Rpsd	P0A7V8	RS4_ECOLI	30S ribosomal protein S4	25.6663	25.7809	0.0778411	0.152816	-1.15799	0.331383	0.537448	-0.114659	0.47967
Rpse	P0A7W1	RS5_ECOLI	30S ribosomal protein S5	25.2884	25.0841	0.0225415	0.185057	1.89776	0.194485	0.398538	0.20426	0.711114
Rpsf	P02358	RS6_ECOLI	30S ribosomal protein S6	24.2561	24.6937	0.120614	0.265077	-2.60253	0.0862677	0.252794	-0.437591	1.06415
Rpsg	P02359	RS7_ECOLI	30S ribosomal protein S7	25.697	25.6187	0.055166	0.189144	0.687982	0.553405	0.705644	0.0782595	0.256957
Rpsh	P0A7W7	RS8_ECOLI	30S ribosomal protein S8	25.0271	25.0869	0.0314244	0.145152	-0.698179	0.551873	0.705039	-0.0598652	0.258161
Rpsi	P0A7X3	RS9_ECOLI	30S ribosomal protein S9	25.2492	25.058	0.0741835	0.0971704	2.70974	0.0575711	0.199165	0.191258	1.2398
Rpsj	P0A7R5	RS10_ECOLI	30S ribosomal protein S10	25.2049	25.1415	0.226593	0.20353	0.360118	0.737166	0.827137	0.0633263	0.132435
Rpsk	P0A7R9	RS11_ECOLI	30S ribosomal protein S11	24.5275	24.5197	0.181253	0.0979636	0.0648732	0.952261	0.971324	0.00771687	0.0212439
Rpsl	P0A7S3	RS12_ECOLI	30S ribosomal protein S12	23.992	24.0665	0.043785	0.129874	-0.940978	0.429982	0.621085	-0.074459	0.36655
Rpsm	P0A7S9	RS13_ECOLI	30S ribosomal protein S13	24.9338	25.1796	0.129596	0.133394	-2.28902	0.0840027	0.251335	-0.245787	1.07571
Rpsn	P0AG59	RS14_ECOLI	30S ribosomal protein S14	23.0139	23.2688	0.0961627	0.129732	-2.7341	0.0570767	0.197866	-0.25491	1.24354
Rpso	P0ADZ4	RS15_ECOLI	30S ribosomal protein S15	23.2737	23.622	0.258121	0.154312	-2.00651	0.130919	0.323614	-0.348384	0.882997
Rpsp	P0A7T3	RS16_ECOLI	30S ribosomal protein S16	23.3341	23.4262	0.141292	0.303264	-0.477074	0.66772	0.781621	-0.0921517	0.175405
Rpsq	P0AG63	RS17_ECOLI	30S ribosomal protein S17	23.6433	23.4642	0.0624927	0.0483718	3.9251	0.0192939	0.108831	0.179086	1.71458
Rpsr	P0A7T7	RS18_ECOLI	30S ribosomal protein S18	23.4655	23.7946	0.128726	0.10482	-3.43417	0.0281677	0.134297	-0.329141	1.55025
Rpss	P0A7U3	RS19_ECOLI	30S ribosomal protein S19	23.7034	23.8003	0.0916372	0.157349	-0.922467	0.420131	0.614482	-0.0969775	0.376615
Rpst	P0A7U7	RS20_ECOLI	30S ribosomal protein S20	23.3389	23.5138	0.272289	0.0563933	-1.08978	0.381873	0.586718	-0.174955	0.418081
Rpsu	P68679	RS21_ECOLI	30S ribosomal protein S21	23.7164	24.3004	0.331065	0.0471089	-3.02513	0.0896487	0.258089	-0.584048	1.04746
Rraa	P0A8R0	RRAA_ECOLI	Regulator of ribonuclease activity A	22.2906	23.383	0.249867	0.278626	-5.05587	0.0074279	0.0639178	-1.09245	2.12913
Rrab	P0AF90	RRAB_ECOLI	Regulator of ribonuclease activity B	17.8515	17.2736	1.82737	2.90811	0.291429	0.787775	0.865252	0.577892	0.103598
Rsd	P0AFX4	RSD_ECOLI	Regulator of sigma D	18.285	18.2983	0.231066	0.343382	-0.0554238	0.958815	0.97563	-0.0132439	0.0182654
Rsea	P0AFX7	RSEA_ECOLI	Anti-sigma-E factor RseA	19.8726	20.0302	0.397876	0.520415	-0.416574	0.699762	0.804147	-0.157554	0.15505
Rseb	P0AFX9	RSEB_ECOLI	Sigma-E factor regulatory protein RseB	20.817	20.9176	0.238121	0.0492746	-0.716298	0.543003	0.698807	-0.100562	0.265198
Rsep	P0AEH1	RSEP_ECOLI	Regulator of sigma-E protease RseP	19.353	19.5602	0.0683694	0.136011	-2.35804	0.101048	0.278385	-0.207245	0.99547
Rsfs	P0AAT6	IOJAP_ECOLI	Ribosomal silencing factor RsfS	20.975	21.1734	0.633011	0.212694	-0.514589	0.649644	0.769948	-0.198399	0.187325
Rsga	P39286	RSGA_ECOLI	Putative ribosome biogenesis GTPase RsgA	18.883	20.0798	1.0153	0.120195	-2.02759	0.176314	0.382512	-1.19684	0.753713
Rsma	P06992	RSMA_ECOLI	Ribosomal RNA small subunit methyltransferase A	20.353	19.6216	0.144253	1.04543	1.20042	0.349021	0.554171	0.731417	0.457148
Rsmb	P36929	RSMB_ECOLI	Ribosomal RNA small subunit methyltransferase B	21.8344	21.7147	0.200094	0.137042	0.855264	0.446439	0.631697	0.119756	0.350237
Rsmc	P39406	RSMC_ECOLI	Ribosomal RNA small subunit methyltransferase C	21.5127	21.5289	0.319954	0.627515	-0.0397487	0.970811	0.983219	-0.0161647	0.0128653
Rsme	P0AGL7	RSME_ECOLI	Ribosomal RNA small subunit methyltransferase E	20.6106	20.9979	0.195951	0.344754	-1.69183	0.184337	0.385224	-0.387342	0.734387
Rsmf	P76273	RSMF_ECOLI	Ribosomal RNA small subunit methyltransferase F	18.4304	18.079	0.549541	1.20029	0.461029	0.678174	0.7897	0.351381	0.168659
Rsmg	P0A6U5	RSMG_ECOLI	Ribosomal RNA small subunit methyltransferase G	22.5138	22.4819	0.196922	0.18606	0.204398	0.848052	0.904589	0.0319708	0.0715775
Rsmh	P60390	RSMH_ECOLI	Ribosomal RNA small subunit methyltransferase H	22.1267	22.2326	0.17865	0.0729392	-0.950525	0.420286	0.614482	-0.105897	0.376455
Rsmi	P67087	RSMI_ECOLI	Ribosomal RNA small subunit methyltransferase I	22.3919	22.5949	0.161253	0.139781	-1.64771	0.17619	0.382512	-0.203013	0.754018
Rsmj	P68567	RSMJ_ECOLI	Ribosomal RNA small subunit methyltransferase J	16.5116	14.6953	3.01399	2.9176	0.74998	0.495012	0.670457	1.81636	0.305385
Rspa	P38104	RSPA_ECOLI	Starvation-sensing protein RspA	15.4396	20.0639	0.308389	0.791267	-9.4314	0.00446951	0.0512915	-4.6243	2.34974
Rspb	P38105	RSPB_ECOLI	Starvation-sensing protein RspB	15.3015	18.5777	2.34795	0.316869	-2.39507	0.134496	0.327675	-3.27616	0.871289
Rssb	P0AEV1	RSSB_ECOLI	Regulator of RpoS	14.7858	15.7335	2.42167	0.42935	-0.66736	0.569664	0.714278	-0.947622	0.244381
Rsta	P52108	RSTA_ECOLI	Transcriptional regulatory protein RstA	21.7263	21.3789	0.178305	0.357879	1.50489	0.231352	0.434994	0.347399	0.635727
Rstb	P18392	RSTB_ECOLI	Sensor protein RstB	15.5648	19.0425	2.80373	0.678073	-2.08819	0.15855	0.354653	-3.47767	0.799835
Rsua	P0AA43	RSUA_ECOLI	Ribosomal small subunit pseudouridine synthase A	21.2201	21.3828	0.459474	0.441018	-0.442579	0.680986	0.791313	-0.162737	0.166862
Ruta	P75898	RUTA_ECOLI	Pyrimidine monooxygenase RutA	14.1177	13.9971	0.308389	0.0992598	0.644587	0.5752	0.714278	0.120566	0.240181
Rutb	P75897	RUTB_ECOLI	Peroxyureidoacrylate/ureidoacrylate amidohydrolase RutB	20.3716	14.5821	0.903193	0.0992598	11.0362	0.00745196	0.0639178	5.78956	2.12773
Rutc	P0AFQ5	RUTC_ECOLI	Putative aminoacrylate peracid reductase RutC	19.796	14.5821	0.708446	0.0992598	12.624	0.00536353	0.0549725	5.21394	2.27055
Rute	P75894	RUTE_ECOLI	Probable malonic semialdehyde reductase RutE	21.9087	15.9971	0.629404	0.0992598	16.0694	0.00312034	0.0442569	5.91156	2.5058
Ruvb	P0A812	RUVB_ECOLI	Holliday junction ATP-dependent DNA helicase RuvB	18.6291	16.3549	0.121615	2.09097	1.88066	0.199906	0.404535	2.27422	0.699174
Sad	P76149	SAD_ECOLI	Succinate semialdehyde dehydrogenase [NAD(P)+] Sad	19.4103	18.5692	0.331201	0.198151	3.77497	0.0280166	0.133964	0.841172	1.55258
Sbcb	P04995	EX1_ECOLI	Exodeoxyribonuclease I	18.2907	19.3954	0.995893	0.191563	-1.8867	0.191023	0.395173	-1.1047	0.718914
Sbp	P0AG78	SUBI_ECOLI	Sulfate-binding protein	20.4206	19.509	1.05152	0.405419	1.40109	0.26931	0.476425	0.911627	0.569747
Sdaa	P16095	SDHL_ECOLI	L-serine dehydratase 1	17.88	14.5821	0.26163	0.0992598	20.4131	0.000659124	0.019607	3.2979	3.18103
Sdha	P0AC41	SDHA_ECOLI	Succinate dehydrogenase flavoprotein subunit	25.0277	22.6983	0.175403	0.246387	13.3403	0.000333393	0.0139068	2.32944	3.47704
Sdhb	P07014	SDHB_ECOLI	Succinate dehydrogenase iron-sulfur subunit	26.3245	21.2695	0.117557	0.190366	39.1328	1.48588e-05	0.00190193	5.055	4.82802
Sdhc	P69054	DHSC_ECOLI	Succinate dehydrogenase cytochrome b556 subunit	20.1389	14.9971	0.0819136	0.0992598	69.2014	4.05657e-07	0.000242083	5.1418	6.39184
Sdhd	P0AC44	DHSD_ECOLI	Succinate dehydrogenase hydrophobic membrane anchor subunit	20.0702	14.5821	0.76609	0.0992598	12.3052	0.00577312	0.0558516	5.48813	2.23859
Seca	P10408	SECA_ECOLI	Protein translocase subunit SecA	25.5814	25.3102	0.119726	0.209066	1.94984	0.14096	0.333713	0.271214	0.850905
Secb	P0AG86	SECB_ECOLI	Protein-export protein SecB	23.047	22.4247	0.414023	0.169654	2.40923	0.106315	0.284765	0.622369	0.973405
Secd	P0AG90	SECD_ECOLI	Protein translocase subunit SecD	24.4245	24.2397	0.0326707	0.138218	2.25379	0.140138	0.333417	0.18481	0.853445
Sece	P0AG96	SECE_ECOLI	Protein translocase subunit SecE	13.1177	15.6137	0.308389	2.35495	-1.8203	0.206112	0.410942	-2.49607	0.685897
Secf	P0AG93	SECF_ECOLI	Protein translocase subunit SecF	20.043	20.098	1.93415	0.789781	-0.0455942	0.966848	0.9804	-0.0549953	0.0146416
Secg	P0AG99	SECG_ECOLI	Protein-export membrane protein SecG	18.6944	18.7587	0.0825383	0.1065	-0.826367	0.457731	0.638444	-0.064285	0.33939
Secy	P0AGA2	SECY_ECOLI	Protein translocase subunit SecY	21.9358	21.8728	0.247226	0.257033	0.305849	0.774999	0.857738	0.0629748	0.110699
Sela	P0A821	SELA_ECOLI	L-seryl-tRNA(Sec) selenium transferase	21.0922	20.8306	0.186947	0.471411	0.893681	0.446049	0.631682	0.26166	0.350617
Selb	P14081	SELB_ECOLI	Selenocysteine-specific elongation factor	21.2625	21.2002	0.200705	0.136981	0.444523	0.682529	0.792552	0.0623634	0.165879
Seld	P16456	SELD_ECOLI	Selenide, water dikinase	22.0575	22.2981	0.142426	0.101544	-2.38253	0.082655	0.250017	-0.240609	1.08273
Seqa	P0AFY8	SEQA_ECOLI	Negative modulator of initiation of replication	23.9412	24.155	0.359355	0.396992	-0.691713	0.527524	0.691725	-0.21385	0.277758
Sera	P0A9T0	SERA_ECOLI	D-3-phosphoglycerate dehydrogenase	26.1789	26.222	0.0538977	0.0554661	-0.96431	0.38954	0.592499	-0.0430585	0.409448
Serb	P0AGB0	SERB_ECOLI	Phosphoserine phosphatase	21.4075	21.5861	0.747842	0.122693	-0.408002	0.721011	0.817915	-0.178517	0.142058
Serc	P23721	SERC_ECOLI	Phosphoserine aminotransferase	25.8757	25.9416	0.201416	0.0543871	-0.547159	0.632951	0.758138	-0.0659066	0.19863
Sers	P0A8L1	SYS_ECOLI	Serine--tRNA ligase	24.7303	24.7928	0.0410297	0.0364159	-1.97418	0.120593	0.310149	-0.0625282	0.918679
Sfsa	P0A823	SFSA_ECOLI	Sugar fermentation stimulation protein A	14.8958	17.9439	2.86422	0.289055	-1.83395	0.205574	0.410942	-3.04812	0.687031
Shia	P76350	SHIA_ECOLI	Shikimate transporter	16.4097	19.6466	2.06109	0.247203	-2.7008	0.110725	0.291529	-3.2369	0.955754
Skp	P0AEU7	SKP_ECOLI	Chaperone protein Skp	24.1285	24.268	0.292639	0.466024	-0.439354	0.687112	0.795653	-0.139587	0.162973
Slma	P0C093	SLMA_ECOLI	Nucleoid occlusion factor SlmA	19.3741	19.3101	0.567107	1.48257	0.0698924	0.949347	0.97034	0.0640527	0.022575
Slya	P0A8W2	SLYA_ECOLI	Transcriptional regulator SlyA	18.3138	19.5471	1.09147	1.3512	-1.22976	0.288921	0.496878	-1.23325	0.539221
Slyb	P0A905	SLYB_ECOLI	Outer membrane lipoprotein SlyB	21.7618	23.1198	0.645716	0.368954	-3.16262	0.0468598	0.174831	-1.35793	1.3292
Slyd	P0A9K9	SLYD_ECOLI	FKBP-type peptidyl-prolyl cis-trans isomerase SlyD	23.3275	24.0946	0.573768	0.374134	-1.93972	0.135894	0.329153	-0.767099	0.866799
Smpb	P0A832	SSRP_ECOLI	SsrA-binding protein	20.4512	20.0622	0.187018	0.235845	2.23846	0.0922637	0.263149	0.389	1.03497
Smta	P36566	SMTA_ECOLI	Protein SmtA	18.6695	16.8818	0.10001	3.44124	0.899403	0.463221	0.643943	1.78769	0.334212
Soda	P00448	SODM_ECOLI	Superoxide dismutase [Mn]	23.2635	26.2599	0.375152	0.33681	-10.294	0.000532616	0.0177254	-2.99635	3.27359
Sodb	P0AGD3	SODF_ECOLI	Superoxide dismutase [Fe]	23.6703	21.343	0.332474	0.393956	7.81975	0.00161774	0.0320467	2.32735	2.79109
Sodc	P0AGD1	SODC_ECOLI	Superoxide dismutase [Cu-Zn]	18.2476	19.7738	0.313309	0.574878	-4.03761	0.0258183	0.12793	-1.52621	1.58807
Sohb	P0AG14	SOHB_ECOLI	Probable protease SohB	22.7341	22.9602	0.427641	0.0287212	-0.913557	0.456645	0.637464	-0.226064	0.340421
Sola	P40874	MTOX_ECOLI	N-methyl-L-tryptophan oxidase	23.3624	23.0334	0.229005	0.179227	1.95932	0.125733	0.320399	0.328958	0.900549
Sotb	P31122	SOTB_ECOLI	Sugar efflux transporter	13.1177	17.7849	0.308389	0.300452	-18.7755	4.76225e-05	0.00396219	-4.6672	4.32219
Spea	P21170	SPEA_ECOLI	Biosynthetic arginine decarboxylase	24.2026	24.1423	0.0177072	0.208997	0.497961	0.66726	0.781621	0.0603014	0.175705
Speb	P60651	SPEB_ECOLI	Agmatinase	20.8358	21.6681	0.322098	0.174414	-3.93566	0.0278465	0.133596	-0.832301	1.55523
Spec	P21169	DCOR_ECOLI	Ornithine decarboxylase, constitutive	21.5197	21.5829	0.0715767	0.169421	-0.595637	0.597742	0.728676	-0.0632487	0.223486
Sped	P0A7F6	SPED_ECOLI	S-adenosylmethionine decarboxylase proenzyme	21.8831	20.8957	0.393219	0.0904613	4.23854	0.0429918	0.166276	0.987392	1.36661
Spee	P09158	SPEE_ECOLI	Spermidine synthase	22.1012	21.9733	0.270622	0.0585153	0.799731	0.501487	0.67405	0.127841	0.299741
Speg	P0A951	ATDA_ECOLI	Spermidine N(1)-acetyltransferase	17.2841	15.8782	0.378266	1.02722	2.22448	0.128903	0.322251	1.40587	0.889735
Spot	P0AG24	SPOT_ECOLI	Bifunctional (p)ppGpp synthase/hydrolase SpoT	20.8226	20.1479	0.337129	0.968463	1.13959	0.352574	0.558214	0.674697	0.45275
Sppa	P08395	SPPA_ECOLI	Protease 4	21.1465	22.1719	0.711367	0.351728	-2.23809	0.113507	0.296044	-1.02542	0.944976
Sra	P68191	SRA_ECOLI	Stationary-phase-induced ribosome-associated protein	18.2175	21.5287	0.0493665	0.162706	-33.7298	0.000314482	0.0139068	-3.31114	3.5024
Srmb	P21507	SRMB_ECOLI	ATP-dependent RNA helicase SrmB	21.8562	22.3248	0.195918	0.0547034	-3.9902	0.0450411	0.169951	-0.468608	1.34639
Ssb	P0AGE0	SSB_ECOLI	Single-stranded DNA-binding protein	22.8013	22.8081	0.219737	0.308583	-0.0311021	0.976829	0.986676	-0.00680247	0.0101815
Ssea	P31142	THTM_ECOLI	3-mercaptopyruvate sulfurtransferase	22.0405	22.1112	0.299825	0.353713	-0.264246	0.804979	0.873545	-0.0707418	0.0942156
Sspa	P0ACA3	SSPA_ECOLI	Stringent starvation protein A	23.8278	24.2495	0.360103	0.267828	-1.62768	0.184771	0.385224	-0.421741	0.733367
Sspb	P0AFZ3	SSPB_ECOLI	Stringent starvation protein B	20.614	19.8224	0.0943112	0.726469	1.87168	0.197994	0.402364	0.791619	0.703348
Sstt	P0AGE4	SSTT_ECOLI	Serine/threonine transporter SstT	16.1297	20.4167	2.76884	0.189981	-2.67548	0.114779	0.298426	-4.28706	0.940137
Stha	P27306	STHA_ECOLI	Soluble pyridine nucleotide transhydrogenase	21.8027	22.2765	0.340694	0.0698243	-2.3599	0.132451	0.325552	-0.47384	0.877944
Stpa	P0ACG1	STPA_ECOLI	DNA-binding protein StpA	22.974	21.7094	0.0546657	0.328723	6.57256	0.0194884	0.109187	1.26452	1.71022
Suca	P0AFG3	ODO1_ECOLI	2-oxoglutarate dehydrogenase E1 component	25.6224	24.2847	0.0836768	0.265541	8.32224	0.00804735	0.0659184	1.33773	2.09435
Sucb	P0AFG6	ODO2_ECOLI	Dihydrolipoyllysine-residue succinyltransferase component of 2-oxoglutarate dehydrogenase complex	25.0395	23.6332	0.0163807	0.171598	14.1302	0.0046221	0.0516186	1.40628	2.33516
Succ	P0A836	SUCC_ECOLI	Succinyl-CoA ligase [ADP-forming] subunit beta	26.4185	24.86	0.0236838	0.0393485	58.7735	4.49356e-06	0.000714635	1.55841	5.34741
Sucd	P0AGE9	SUCD_ECOLI	Succinyl-CoA ligase [ADP-forming] subunit alpha	25.4559	24.0562	0.0644317	0.167634	13.4998	0.00184022	0.0336498	1.39975	2.73513
Sufb	P77522	SUFB_ECOLI	FeS cluster assembly protein SufB	17.888	18.4592	2.15002	0.264193	-0.456736	0.691507	0.798818	-0.571217	0.160203
Sufc	P77499	SUFC_ECOLI	Probable ATP-dependent transporter SufC	21.8621	24.7892	0.0871396	0.192641	-23.9791	0.000260008	0.0131107	-2.92714	3.58501
Sufe	P76194	SUFE_ECOLI	Cysteine desulfuration protein SufE	17.2589	22.1958	1.13861	0.231729	-7.35916	0.0143793	0.0909779	-4.9369	1.84226
Sufs	P77444	SUFS_ECOLI	Cysteine desulfurase	21.5667	24.4055	0.0867047	0.0705897	-43.9779	2.45428e-06	0.000453769	-2.83883	5.61008
Suhb	P0ADG4	SUHB_ECOLI	Inositol-1-monophosphatase	22.6231	22.1872	0.215343	0.248113	2.29799	0.084433	0.251335	0.435877	1.07349
Sula	P0AFZ5	SULA_ECOLI	Cell division inhibitor SulA	16.0948	12.9971	2.30332	0.0992598	2.32727	0.144947	0.33662	3.09772	0.838792
Sura	P0ABZ6	SURA_ECOLI	Chaperone SurA	23.058	23.3708	0.338379	0.455611	-0.954637	0.397999	0.598798	-0.312796	0.400118
Sure	P0A840	SURE_ECOLI	5'/3'-nucleotidase SurE	19.235	19.0106	0.824547	0.147636	0.464054	0.685781	0.794676	0.224427	0.163814
Syd	P0A8U0	SYDP_ECOLI	Protein Syd	16.8737	16.3614	0.764095	1.96349	0.421146	0.706081	0.809036	0.512296	0.151145
Tala	P0A867	TALA_ECOLI	Transaldolase A	20.1804	23.6003	0.862236	0.0911843	-6.83159	0.0195931	0.109406	-3.41981	1.7079
Talb	P0A870	TALB_ECOLI	Transaldolase B	25.1812	24.8446	0.112465	0.0617107	4.54446	0.0185324	0.106338	0.336583	1.73207
Tas	P0A9T4	TAS_ECOLI	Protein tas	21.8314	22.5381	0.406565	0.274672	-2.49468	0.0758666	0.236408	-0.706689	1.11995
Tata	P69428	TATA_ECOLI	Sec-independent protein translocase protein TatA	19.9077	20.3134	0.0930211	0.0798472	-5.73193	0.00491518	0.0522256	-0.405693	2.30846
Tate	P0A843	TATE_ECOLI	Sec-independent protein translocase protein TatE	13.1177	20.146	0.308389	0.185985	-33.8028	2.725e-05	0.00302294	-7.02832	4.56463
Taua	Q47537	TAUA_ECOLI	Taurine-binding periplasmic protein	16.4908	16.8208	3.03976	1.84389	-0.160773	0.881628	0.930266	-0.330011	0.0547147
Taub	Q47538	TAUB_ECOLI	Taurine import ATP-binding protein TauB	19.5192	19.6884	0.312977	0.535961	-0.472029	0.667051	0.781621	-0.169144	0.175841
Taud	P37610	TAUD_ECOLI	Alpha-ketoglutarate-dependent taurine dioxygenase	23.577	24.0913	0.0752899	0.0968618	-7.26158	0.0023911	0.0378933	-0.51434	2.6214
Tdcf	P0AGL2	TDCF_ECOLI	Putative reactive intermediate deaminase TdcF	20.5241	21.4669	0.372974	0.291429	-3.45012	0.0285134	0.134532	-0.942837	1.54495
Tdh	P07913	TDH_ECOLI	L-threonine 3-dehydrogenase	22.0752	23.3229	0.00714588	0.138937	-15.5333	0.00402865	0.0489319	-1.24766	2.39484
Tdk	P23331	KITH_ECOLI	Thymidine kinase	19.407	19.5444	0.565724	0.127403	-0.410207	0.718157	0.816266	-0.137338	0.143781
Tehb	P25397	TEHB_ECOLI	Tellurite methyltransferase	19.0732	21.7379	0.373832	0.168761	-11.2525	0.00210936	0.0365623	-2.66466	2.67585
Tesa	P0ADA1	TESA_ECOLI	Acyl-CoA thioesterase I	20.7329	21.4708	0.146909	0.713634	-1.75417	0.211605	0.413364	-0.737904	0.674475
Tesb	P0AGG2	TESB_ECOLI	Acyl-CoA thioesterase 2	15.8489	14.7988	2.59625	3.05091	0.454028	0.673923	0.786953	1.05012	0.171389
Tgt	P0A847	TGT_ECOLI	Queuine tRNA-ribosyltransferase	22.0486	21.457	0.34522	0.131729	2.7732	0.0826024	0.250017	0.591608	1.08301
Thid	P76422	THID_ECOLI	Hydroxymethylpyrimidine/phosphomethylpyrimidine kinase	18.0514	17.6533	0.483583	0.396044	1.10309	0.334112	0.540819	0.398083	0.476108
Thii	P77718	THII_ECOLI	tRNA sulfurtransferase	21.8826	21.5826	0.15932	0.24684	1.76847	0.163749	0.361378	0.299968	0.785821
Thil	P0AGG0	THIL_ECOLI	Thiamine-monophosphate kinase	19.9537	20.1339	0.238351	0.253989	-0.896237	0.420979	0.614482	-0.180232	0.37574
Thim	P76423	THIM_ECOLI	Hydroxyethylthiazole kinase	17.2537	17.3909	0.457032	0.377962	-0.400631	0.709851	0.809036	-0.13718	0.148833
Thra	P00561	AK1H_ECOLI	Bifunctional aspartokinase/homoserine dehydrogenase 1	25.4692	24.9667	0.0280718	0.0919314	9.05426	0.00684038	0.0614821	0.502475	2.16492
Thrb	P00547	KHSE_ECOLI	Homoserine kinase	21.9803	21.1445	0.102548	0.163634	7.49603	0.00328631	0.0451935	0.835755	2.48329
Thrc	P00934	THRC_ECOLI	Threonine synthase	24.4846	23.9396	0.0608637	0.0470398	12.2719	0.00035937	0.0139068	0.545014	3.44446
Thrs	P0A8M3	SYT_ECOLI	Threonine--tRNA ligase	25.1825	24.5131	0.0447456	0.110368	9.73655	0.00385055	0.0477	0.669471	2.41448
Thya	P0A884	TYSY_ECOLI	Thymidylate synthase	21.1496	20.9166	0.0764273	0.436808	0.910396	0.453912	0.636205	0.233082	0.343028
Tig	P0A850	TIG_ECOLI	Trigger factor	26.5681	26.3412	0.00794617	0.0211777	17.3756	0.00101844	0.0238688	0.226913	2.99206
Tils	P52097	TILS_ECOLI	tRNA(Ile)-lysidine synthase	20.8907	18.7275	0.0894372	4.86709	0.769695	0.521912	0.687074	2.16322	0.282403
Tkta	P27302	TKT1_ECOLI	Transketolase 1	25.0281	24.6336	0.148527	0.192098	2.81406	0.0516376	0.185985	0.394511	1.28703
Tktb	P33570	TKT2_ECOLI	Transketolase 2	19.8787	23.1566	0.621498	0.141982	-8.90572	0.00901371	0.0701145	-3.2779	2.0451
Tldd	P0AGG8	TLDD_ECOLI	Protein TldD	22.0996	22.2239	0.160899	0.0476395	-1.28227	0.31172	0.518661	-0.124228	0.506236
Tmk	P0A720	KTHY_ECOLI	Thymidylate kinase	18.6254	19.0044	0.11702	0.413179	-1.5285	0.249139	0.453079	-0.378963	0.603558
Tola	P19934	TOLA_ECOLI	Protein TolA	16.5069	18.5491	3.012	0.650903	-1.14787	0.36107	0.566278	-2.0422	0.442408
Tolb	P0A855	TOLB_ECOLI	Protein TolB	23.6221	23.7179	0.324343	0.0812487	-0.496557	0.663824	0.778986	-0.0958581	0.177947
Tolc	P02930	TOLC_ECOLI	Outer membrane protein TolC	22.9899	24.3855	1.18001	0.163715	-2.02902	0.174866	0.381115	-1.39557	0.757294
Tolq	P0ABU9	TOLQ_ECOLI	Protein TolQ	21.6409	21.2077	0.213205	0.235732	2.36074	0.078251	0.240477	0.433217	1.10651
Tolr	P0ABV6	TOLR_ECOLI	Protein TolR	20.2174	20.0972	0.0573707	0.140051	1.37526	0.273665	0.483416	0.12017	0.562781
Tonb	P02929	TONB_ECOLI	Protein TonB	15.7863	18.8263	1.66705	0.114324	-3.15112	0.0866252	0.252885	-3.03999	1.06236
Topa	P06612	TOP1_ECOLI	DNA topoisomerase 1	23.31	23.1085	0.100969	0.129142	2.12814	0.104426	0.284435	0.201415	0.981189
Tora	P33225	TORA_ECOLI	Trimethylamine-N-oxide reductase 1	16.7574	18.8371	2.8995	0.346661	-1.23352	0.339708	0.545144	-2.07966	0.468895
Tpia	P0A858	TPIS_ECOLI	Triosephosphate isomerase	23.9988	23.9586	0.269903	0.163051	0.220849	0.838223	0.89706	0.040207	0.0766403
Tpx	P0A862	TPX_ECOLI	Thiol peroxidase	24.1615	25.4603	0.45463	0.323911	-4.03008	0.0192147	0.108831	-1.29884	1.71637
Trer	P36673	TRER_ECOLI	HTH-type transcriptional regulator TreR	18.5646	18.1426	0.171678	0.282464	2.21134	0.105811	0.284585	0.422011	0.975468
Trka	P0AGI8	TRKA_ECOLI	Trk system potassium uptake protein TrkA	20.0716	20.4352	0.106693	0.239596	-2.40114	0.103159	0.281985	-0.363596	0.986493
Trmb	P0A8I5	TRMB_ECOLI	tRNA (guanine-N(7)-)-methyltransferase	21.4257	21.3208	0.236648	0.913556	0.192524	0.863225	0.91666	0.104897	0.063876
Trmh	P0AGJ2	TRMH_ECOLI	tRNA (guanosine(18)-2'-O)-methyltransferase	17.8453	17.5305	0.306968	2.9712	0.182549	0.871668	0.923857	0.314815	0.0596487
Trmj	P0AE01	TRMJ_ECOLI	tRNA (cytidine/uridine-2'-O-)-methyltransferase TrmJ	20.9655	20.6002	0.535307	0.650352	0.75125	0.495731	0.670457	0.365345	0.304754
Trpa	P0A877	TRPA_ECOLI	Tryptophan synthase alpha chain	23.9801	24.1219	0.325051	0.195289	-0.647781	0.559662	0.709275	-0.141821	0.252074
Trpb	P0A879	TRPB_ECOLI	Tryptophan synthase beta chain	24.7745	24.7672	0.0741878	0.0553297	0.137253	0.897973	0.940357	0.0073338	0.0467367
Trpc	P00909	TRPC_ECOLI	Tryptophan biosynthesis protein TrpCF	23.8923	24.122	0.0266672	0.076502	-4.9098	0.024919	0.126419	-0.229656	1.60347
Trpe	P00895	TRPE_ECOLI	Anthranilate synthase component 1	24.1486	23.9485	0.060826	0.121697	2.54765	0.0858008	0.252794	0.200116	1.06651
Trpgd	P00904	TRPGD_ECOLI	Bifunctional protein TrpGD	23.6605	23.5412	0.0575665	0.0779543	2.13264	0.105864	0.284585	0.119318	0.97525
Trpr	P0A881	TRPR_ECOLI	Trp operon repressor	17.0192	18.9628	2.23333	1.6887	-1.20234	0.300072	0.508472	-1.94361	0.522775
Trps	P00954	SYW_ECOLI	Tryptophan--tRNA ligase	23.9658	23.8914	0.109263	0.263751	0.451485	0.68579	0.794676	0.0744164	0.163809
Trua	P07649	TRUA_ECOLI	tRNA pseudouridine synthase A	21.3567	21.4923	0.119596	0.142597	-1.26266	0.277226	0.485449	-0.135674	0.557166
Trub	P60340	TRUB_ECOLI	tRNA pseudouridine synthase B	19.9399	19.1128	0.0979711	0.601238	2.3518	0.13665	0.32973	0.827137	0.86439
Trud	Q57261	TRUD_ECOLI	tRNA pseudouridine synthase D	20.7755	21.0355	0.138117	0.238566	-1.63333	0.195074	0.398775	-0.259951	0.7098
Trxa	P0AA25	THIO_ECOLI	Thioredoxin-1	22.8968	23.659	0.788639	0.453547	-1.45104	0.237402	0.440889	-0.762155	0.624516
Trxb	P0A9P4	TRXB_ECOLI	Thioredoxin reductase	23.2049	23.8008	0.154784	0.0446649	-6.40617	0.0158325	0.0980908	-0.595842	1.80045
Trxc	P0AGG4	THIO2_ECOLI	Thioredoxin-2	16.0584	19.2116	3.03599	0.162754	-1.79638	0.21355	0.415126	-3.15327	0.6705
Tryp_pig	P00761	TRYP_PIG	Trypsin	24.9561	25.1798	0.0816724	0.312497	-1.19991	0.340296	0.545144	-0.223759	0.468143
Tsab	P76256	TSAB_ECOLI	tRNA threonylcarbamoyladenosine biosynthesis protein TsaB	19.4821	19.2305	0.390967	0.463468	0.718619	0.513174	0.682469	0.251571	0.289735
Tsac	P45748	TSAC_ECOLI	Threonylcarbamoyl-AMP synthase	20.4095	19.8634	0.526938	0.156454	1.72094	0.208415	0.41171	0.546148	0.681071
Tsad	P05852	TSAD_ECOLI	tRNA N6-adenosine threonylcarbamoyltransferase	20.5665	20.0271	0.876819	0.941587	0.726126	0.508163	0.679184	0.539389	0.293997
Tsae	P0AF67	TSAE_ECOLI	tRNA threonylcarbamoyladenosine biosynthesis protein TsaE	18.5494	20.7681	3.03725	0.600903	-1.24121	0.332522	0.538771	-2.21872	0.478179
Tsf	P0A6P1	EFTS_ECOLI	Elongation factor Ts	25.8964	25.905	0.411582	0.310184	-0.0289721	0.978375	0.986676	-0.00862074	0.00949486
Tsx	P0A927	TSX_ECOLI	Nucleoside-specific channel-forming protein tsx	22.651	21.8327	0.127725	0.598026	2.31756	0.135785	0.329153	0.81823	0.867148
Tufa;tufb	P0CE47;P0CE48	EFTU1_ECOLI;EFTU2_ECOLI	Elongation factor Tu 1	29.4082	29.4227	0.0655309	0.133401	-0.168791	0.877001	0.926558	-0.0144839	0.0570001
Tusb	P45530	TUSB_ECOLI	Protein TusB	17.6814	16.7751	0.635769	2.31084	0.654931	0.571943	0.714278	0.90625	0.242647
Typa	P32132	TYPA_ECOLI	GTP-binding protein TypA/BipA	24.2503	24.4135	0.0477083	0.185101	-1.4782	0.263366	0.472242	-0.163135	0.579441
Tyra	P07023	TYRA_ECOLI	T-protein	24.6234	25.0221	0.0833352	0.0764962	-6.10462	0.00373106	0.0473317	-0.398696	2.42817
Tyrb	P04693	TYRB_ECOLI	Aromatic-amino-acid aminotransferase	24.9824	24.9369	0.0590464	0.0923454	0.717777	0.519073	0.684962	0.0454229	0.284772
Tyrr	P07604	TYRR_ECOLI	Transcriptional regulatory protein TyrR	21.1742	22.1785	0.511797	0.416981	-2.63505	0.0603037	0.204369	-1.00433	1.21966
Tyrs	P0AGJ9	SYY_ECOLI	Tyrosine--tRNA ligase	24.6496	24.4681	0.224746	0.0559818	1.35772	0.294787	0.50161	0.181557	0.530492
Ubib	P0A6A0	UBIB_ECOLI	Probable protein kinase UbiB	18.9332	19.4479	0.656253	0.0454169	-1.35518	0.307052	0.51403	-0.514688	0.512788
Ubid	P0AAB4	UBID_ECOLI	3-octaprenyl-4-hydroxybenzoate carboxy-lyase	21.4815	21.4065	0.149218	0.369894	0.325661	0.768801	0.852415	0.0749934	0.114186
Ubie	P0A887	UBIE_ECOLI	Ubiquinone/menaquinone biosynthesis C-methyltransferase UbiE	21.5779	19.6152	0.156461	1.18326	2.84817	0.100347	0.277832	1.96269	0.998496
Ubif	P75728	UBIF_ECOLI	2-octaprenyl-3-methyl-6-methoxy-1,4-benzoquinol hydroxylase	19.766	19.7222	0.147927	0.133867	0.380791	0.7229	0.817915	0.0438613	0.140922
Ubig	P17993	UBIG_ECOLI	Ubiquinone biosynthesis O-methyltransferase	21.7868	21.3387	0.142352	0.58885	1.28118	0.317032	0.523128	0.448112	0.498897
Ubih	P25534	UBIH_ECOLI	2-octaprenyl-6-methoxyphenol hydroxylase	15.1015	12.9971	1.42481	0.0992598	2.55198	0.124142	0.317316	2.10438	0.906081
Ubii	P25535	UBII_ECOLI	2-octaprenylphenol hydroxylase	20.5949	20.4242	0.241483	0.315995	0.743524	0.501127	0.67405	0.170723	0.300052
Ubix	P0AG03	UBIX_ECOLI	3-octaprenyl-4-hydroxybenzoate carboxy-lyase partner protein	20.3546	20.1215	0.335334	0.622933	0.570664	0.607337	0.734455	0.233088	0.21657
Ucpa	P37440	UCPA_ECOLI	Oxidoreductase UcpA	18.4307	13.9971	0.699549	0.0992598	10.8686	0.00727063	0.0634726	4.43363	2.13843
Udk	P0A8F4	URK_ECOLI	Uridine kinase	21.4822	21.6858	0.293952	0.122213	-1.10811	0.357518	0.562297	-0.203668	0.446702
Udp	P12758	UDP_ECOLI	Uridine phosphorylase	22.9661	23.4032	0.333205	0.0790025	-2.21098	0.144668	0.33662	-0.437132	0.839627
Ugd	P76373	UDG_ECOLI	UDP-glucose 6-dehydrogenase	23.9262	24.2172	0.162658	0.0229004	-3.06775	0.0875227	0.254167	-0.290935	1.05788
Ugpq	P10908	UGPQ_ECOLI	Glycerophosphoryl diester phosphodiesterase	19.7739	20.9764	1.051	0.579473	-1.73544	0.17773	0.384446	-1.20251	0.750238
Ung	P12295	UNG_ECOLI	Uracil-DNA glycosylase	19.2491	18.8915	0.374612	0.294987	1.29902	0.267299	0.475706	0.357606	0.573003
Upp	P0A8F0	UPP_ECOLI	Uracil phosphoribosyltransferase	23.5581	23.1118	0.169874	0.153594	3.37578	0.0283282	0.134297	0.446355	1.54778
Uppp	P60932	UPPP_ECOLI	Undecaprenyl-diphosphatase	17.8648	17.662	0.398712	0.321199	0.686104	0.531953	0.694021	0.202813	0.274127
Usg	P08390	USG_ECOLI	USG-1 protein	23.7729	24.5338	0.0917396	0.0107332	-14.2678	0.00436978	0.0509123	-0.760861	2.35954
Usha	P07024	USHA_ECOLI	Protein UshA	21.3829	21.2424	0.0786994	0.173793	1.27517	0.298162	0.506195	0.140457	0.525548
Uspa	P0AED0	USPA_ECOLI	Universal stress protein A	23.9152	24.2792	0.297452	0.116182	-1.97438	0.15694	0.351951	-0.364014	0.804267
Uspd	P0AAB8	USPD_ECOLI	Universal stress protein D	20.1575	20.3686	0.327058	0.0863642	-1.08071	0.380853	0.586718	-0.211062	0.419242
Uspe	P0AAC0	USPE_ECOLI	Universal stress protein E	21.9415	22.7767	0.454006	0.163591	-2.99762	0.0723076	0.229181	-0.83519	1.14082
Uspf	P37903	USPF_ECOLI	Universal stress protein F	22.3659	19.1046	0.250123	1.64853	3.38778	0.0724831	0.2293	3.26132	1.13976
Uspg	P39177	USPG_ECOLI	Universal stress protein G	22.7773	19.5255	0.122865	1.15216	4.86088	0.0380655	0.160357	3.25178	1.41947
Uup	P43672	UUP_ECOLI	ABC transporter ATP-binding protein uup	19.9899	20.3942	0.221951	0.152473	-2.60002	0.0678259	0.219576	-0.404218	1.1686
Uvra	P0A698	UVRA_ECOLI	UvrABC system protein A	20.2698	21.0516	0.584471	0.0679118	-2.30143	0.144677	0.33662	-0.78183	0.8396
Uvrb	P0A8F8	UVRB_ECOLI	UvrABC system protein B	22.8582	22.5673	0.0311368	0.0700501	6.57305	0.00921863	0.071333	0.290915	2.03533
Uvrd	P03018	UVRD_ECOLI	DNA helicase II	14.5249	17.5351	2.73453	0.312618	-1.89433	0.195431	0.398833	-3.01022	0.709007
Uxaa	P42604	UXAA_ECOLI	Altronate dehydratase	13.1177	14.0842	0.308389	1.81387	-0.909914	0.454372	0.636205	-0.966572	0.342589
Uxab	P0A6L7	UXAB_ECOLI	Altronate oxidoreductase	15.4396	20.6631	0.308389	0.12084	-27.3156	0.000286304	0.0136117	-5.22354	3.54317
Uxac	P0A8G3	UXAC_ECOLI	Uronate isomerase	20.075	23.2558	0.286985	0.0682059	-18.677	0.00172205	0.0329367	-3.1808	2.76395
Uxua	P24215	UXUA_ECOLI	Mannonate dehydratase	23.3651	23.4846	0.0811305	0.152819	-1.19647	0.316319	0.523128	-0.119519	0.499875
Uxub	P39160	UXUB_ECOLI	D-mannonate oxidoreductase	19.9014	21.1251	0.787437	0.234879	-2.57938	0.104612	0.284435	-1.22371	0.98042
Vals	P07118	SYV_ECOLI	Valine--tRNA ligase	24.8689	24.6584	0.0581673	0.201327	1.73924	0.205962	0.410942	0.210431	0.686212
Waaa	P0AC75	KDTA_ECOLI	3-deoxy-D-manno-octulosonic acid transferase	18.7903	17.8824	0.389437	0.151842	3.76239	0.0420248	0.165471	0.907968	1.37649
Weca	P0AC78	WECA_ECOLI	Undecaprenyl-phosphate alpha-N-acetylglucosaminyl 1-phosphate transferase	17.1679	16.0967	0.159207	2.72516	0.679678	0.566411	0.714278	1.07121	0.246868
Wecb	P27828	WECB_ECOLI	UDP-N-acetylglucosamine 2-epimerase	21.4469	19.2771	0.0729936	1.74997	2.14574	0.164596	0.362285	2.16983	0.783581
Wecc	P27829	WECC_ECOLI	UDP-N-acetyl-D-mannosamine dehydrogenase	19.5451	18.7029	0.443908	0.41943	2.38869	0.075482	0.235651	0.842246	1.12216
Wecg	P27836	WECG_ECOLI	UDP-N-acetyl-D-mannosaminuronic acid transferase	17.5069	14.8415	0.500985	1.39394	3.11672	0.0667412	0.21776	2.66539	1.17561
Wrba	P0A8G6	NQOR_ECOLI	NAD(P)H dehydrogenase (quinone)	21.1217	22.8846	0.270285	0.217616	-8.7996	0.00112373	0.0251325	-1.76293	2.94934
Wzc	P76387	WZC_ECOLI	Tyrosine-protein kinase wzc	13.1177	15.4699	0.308389	4.37889	-0.928121	0.450499	0.634204	-2.35224	0.346307
Wzzb	P76372	WZZB_ECOLI	Chain length determinant protein	21.2848	20.5747	0.18	0.251255	3.97942	0.0198631	0.109808	0.710113	1.70195
Wzze	P0AG00	WZZE_ECOLI	Lipopolysaccharide biosynthesis protein WzzE	20.4045	20.3673	0.627885	0.112859	0.101119	0.928181	0.960942	0.0372442	0.0323675
Xerd	P0A8P8	XERD_ECOLI	Tyrosine recombinase XerD	16.1374	17.435	1.84044	0.163925	-1.21637	0.346266	0.551375	-1.29761	0.46059
Xseb	P0A8G9	EX7S_ECOLI	Exodeoxyribonuclease 7 small subunit	21.4921	22.2653	0.12092	0.115775	-8.00062	0.00133402	0.0284591	-0.773286	2.87484
Xtha	P09030	EX3_ECOLI	Exodeoxyribonuclease III	21.7056	22.2638	0.268884	0.419715	-1.93981	0.136727	0.32973	-0.558247	0.864146
Yaaa	P0A8I3	YAAA_ECOLI	UPF0246 protein YaaA	20.4599	20.8454	0.506435	0.164141	-1.25441	0.317382	0.523128	-0.385561	0.498418
Yadg	P36879	YADG_ECOLI	Uncharacterized ABC transporter ATP-binding protein YadG	21.5785	21.6568	0.075657	0.175704	-0.708962	0.534314	0.694021	-0.0783031	0.272204
Yaeh	P62768	YAEH_ECOLI	UPF0325 protein YaeH	22.8894	23.1318	0.372571	0.273455	-0.908321	0.419364	0.614482	-0.242363	0.377409
Yaep	P0A8K5	YAEP_ECOLI	UPF0253 protein YaeP	17.715	18.2397	0.23166	0.589339	-1.43524	0.259658	0.468197	-0.524723	0.585598
Yaeq	P0AA97	YAEQ_ECOLI	Uncharacterized protein YaeQ	16.9731	17.6281	0.206722	3.05018	-0.371088	0.745906	0.833572	-0.654993	0.127316
Yafd	P0A8U2	YAFD_ECOLI	UPF0294 protein YafD	19.7924	18.7962	0.198532	0.74206	2.24631	0.137768	0.32985	0.996229	0.860852
Yafj	Q47147	YAFJ_ECOLI	Putative glutamine amidotransferase YafJ	17.5584	17.3837	0.370473	0.452005	0.517979	0.632798	0.758138	0.174777	0.198735
Yafs	P75672	YAFS_ECOLI	Uncharacterized protein YafS	13.7807	15.2021	1.44683	1.81383	-1.06111	0.351192	0.556556	-1.42143	0.454455
Yafv	Q47679	YAFV_ECOLI	Hydrolase YafV	19.5895	19.4969	1.09548	0.933993	0.111448	0.916757	0.952832	0.0926292	0.0377455
Yagu	P0AAA1	YAGU_ECOLI	Inner membrane protein YagU	22.5334	23.741	0.0497076	0.137617	-14.2946	0.00179564	0.0331995	-1.20757	2.74578
Yahd	P77736	YAHD_ECOLI	Putative ankyrin repeat protein YahD	19.7293	20.4101	0.19823	0.369129	-2.81437	0.065408	0.214672	-0.680805	1.18437
Yahj	P77554	YAHJ_ECOLI	Uncharacterized protein YahJ	15.8934	16.8614	2.10856	0.135512	-0.79354	0.510064	0.680086	-0.968032	0.292375
Yahk	P75691	YAHK_ECOLI	Aldehyde reductase YahK	18.0151	21.2036	0.939614	0.237189	-5.69878	0.0222714	0.116907	-3.18849	1.65225
Yaho	P75694	YAHO_ECOLI	Uncharacterized protein YahO	16.2151	21.4789	0.901043	0.333165	-9.49043	0.004782	0.0521055	-5.26378	2.32039
Yaia	P0AAN5	YAIA_ECOLI	Uncharacterized protein YaiA	13.1177	17.4429	0.308389	3.75468	-1.98854	0.183374	0.385224	-4.3252	0.736663
Yaie	P0C037	YAIE_ECOLI	UPF0345 protein YaiE	19.9803	20.7336	0.681411	0.181002	-1.85081	0.189564	0.392819	-0.753381	0.722245
Yaii	P0A8D3	YAII_ECOLI	UPF0178 protein YaiI	16.7557	16.3231	1.22406	2.24034	0.293441	0.787759	0.865252	0.432513	0.103607
Yail	P51024	YAIL_ECOLI	Uncharacterized protein YaiL	14.6717	14.4815	2.98877	2.5016	0.0845324	0.936814	0.964641	0.190218	0.0283464
Yait	P77199	YAIT_ECOLI	Putative uncharacterized protein YaiT	19.391	22.6531	1.11987	0.249187	-4.92499	0.0320232	0.144801	-3.26216	1.49454
Yajc	P0ADZ7	YAJC_ECOLI	UPF0092 membrane protein YajC	23.5219	23.335	0.170226	0.214615	1.18167	0.305918	0.513152	0.186885	0.514396
Yajg	P0ADA5	YAJG_ECOLI	Uncharacterized lipoprotein YajG	22.1899	21.5734	0.203538	0.411901	2.32407	0.105046	0.284585	0.616485	0.978621
Yajl	Q46948	YAJL_ECOLI	Chaperone protein YajL	20.4336	20.9815	0.133504	0.242924	-3.42375	0.0395457	0.163589	-0.547926	1.4029
Yajo	P77735	YAJO_ECOLI	Uncharacterized oxidoreductase YajO	19.6547	20.4376	0.38066	0.3052	-2.77938	0.052508	0.187496	-0.782925	1.27977
Yajq	P0A8E7	YAJQ_ECOLI	UPF0234 protein YajQ	23.4572	23.7145	0.419979	0.246846	-0.914895	0.423237	0.614942	-0.25732	0.373417
Ybab	P0A8B5	YBAB_ECOLI	Nucleoid-associated protein YbaB	21.559	21.8947	0.36034	0.483546	-0.963997	0.393766	0.596203	-0.335633	0.404762
Ybae	P46890	YBAE_ECOLI	Uncharacterized protein YbaE	13.1177	12.9971	0.308389	0.0992598	0.644587	0.5752	0.714278	0.120566	0.240181
Ybak	P0AAR3	YBAK_ECOLI	Cys-tRNA(Pro)/Cys-tRNA(Cys) deacylase YbaK	22.3598	22.2886	0.212294	0.245148	0.380435	0.723337	0.817915	0.0712292	0.140659
Ybal	P39830	YBAL_ECOLI	Inner membrane protein YbaL	18.48	21.04	2.66359	0.131996	-1.6626	0.237683	0.440919	-2.55993	0.624002
Ybam	P45807	YBAM_ECOLI	Uncharacterized protein YbaM	13.1177	12.9971	0.308389	0.0992598	0.644587	0.5752	0.714278	0.120566	0.240181
Ybay	P77717	YBAY_ECOLI	Uncharacterized lipoprotein YbaY	16.8923	20.6725	2.65521	0.273454	-2.45296	0.131079	0.323614	-3.78024	0.882467
Ybba	P0A9T8	YBBA_ECOLI	Uncharacterized ABC transporter ATP-binding protein YbbA	16.8337	18.0342	2.58282	0.178858	-0.803115	0.50549	0.677789	-1.20047	0.296287
Ybbn	P77395	YBBN_ECOLI	Uncharacterized protein YbbN	22.3939	22.9751	0.558559	0.439812	-1.41599	0.233433	0.436441	-0.5812	0.631838
Ybbo	P0AFP4	YBBO_ECOLI	Uncharacterized oxidoreductase YbbO	20.2538	19.8532	0.125558	0.613213	1.10856	0.375392	0.584881	0.400616	0.425515
Ybcj	P0AAS7	YBCJ_ECOLI	Uncharacterized protein YbcJ	19.5021	19.7426	0.0790149	0.211381	-1.84573	0.17819	0.384446	-0.240477	0.749117
Ybdh	P45579	YBDH_ECOLI	Uncharacterized oxidoreductase YbdH	21.3453	19.9986	0.342163	0.53514	3.67232	0.028258	0.134297	1.34671	1.54886
Ybdl	P77806	YBDL_ECOLI	Methionine aminotransferase	21.1784	20.4104	0.122198	0.606621	2.14961	0.154968	0.34875	0.767985	0.809757
Ybdz	P18393	YBDZ_ECOLI	Uncharacterized protein YbdZ	18.2	16.747	0.20448	3.15387	0.796305	0.508756	0.679431	1.45303	0.29349
Ybed	P0A8J4	YBED_ECOLI	UPF0250 protein YbeD	18.0627	19.2029	0.269889	0.241696	-5.45092	0.00569677	0.0556437	-1.14017	2.24437
Ybel	P0AAT9	YBEL_ECOLI	Uncharacterized protein YbeL	18.9893	18.2519	0.364608	0.327147	2.60715	0.0602965	0.204369	0.737357	1.21971
Ybem	P39874	YBEM_ECOLI	Putative hydrolase YbeM	19.4498	20.5071	0.427413	0.127691	-4.10507	0.0410351	0.164791	-1.05724	1.38684
Ybey	P0A898	YBEY_ECOLI	Endoribonuclease YbeY	17.4244	18.2504	1.28315	0.398674	-1.06473	0.382867	0.586718	-0.825977	0.416952
Ybez	P0A9K3	PHOL_ECOLI	PhoH-like protein	23.2727	23.1304	0.0855031	0.0618947	2.33539	0.0861733	0.252794	0.142323	1.06463
Ybfe	P0AAU7	YBFE_ECOLI	Uncharacterized protein YbfE	13.1177	12.9971	0.308389	0.0992598	0.644587	0.5752	0.714278	0.120566	0.240181
Ybff	P75736	YBFF_ECOLI	Esterase YbfF	21.0129	22.0047	0.766521	0.214474	-2.15818	0.146207	0.338841	-0.991787	0.835033
Ybgc	P0A8Z3	YBGC_ECOLI	Acyl-CoA thioester hydrolase YbgC	14.9357	15.4647	1.71491	1.50679	-0.401348	0.709003	0.809036	-0.528974	0.149352
Ybgf	P45955	YBGF_ECOLI	Uncharacterized protein YbgF	19.5433	19.3439	0.466619	0.520692	0.493782	0.647637	0.768665	0.199326	0.188668
Ybgi	P0AFP6	GTPC1_ECOLI	Putative GTP cyclohydrolase 1 type 2	22.0307	22.4805	0.0782704	0.241137	-3.07278	0.0721209	0.229039	-0.449765	1.14194
Ybgj	P0AAV4	YBGJ_ECOLI	Uncharacterized protein YbgJ	20.7099	21.0127	0.102908	0.801445	-0.649065	0.581012	0.717746	-0.302798	0.235815
Ybgk	P75745	YBGK_ECOLI	Uncharacterized protein YbgK	19.5675	20.4159	1.12276	0.145221	-1.29805	0.320218	0.525078	-0.848441	0.494554
Ybgs	P0AAV6	YBGS_ECOLI	Uncharacterized protein YbgS	13.1177	12.9971	0.308389	0.0992598	0.644587	0.5752	0.714278	0.120566	0.240181
Ybhb	P12994	YBHB_ECOLI	UPF0098 protein YbhB	18.3779	18.3357	0.770381	0.630508	0.0734606	0.945097	0.96778	0.0422218	0.0245235
Ybhg	P75777	YBHG_ECOLI	UPF0194 membrane protein YbhG	19.2517	19.6736	0.283354	0.139738	-2.31271	0.106223	0.284765	-0.421853	0.973781
Ybib	P30177	YBIB_ECOLI	Uncharacterized protein YbiB	22.8601	23.1477	0.0717063	0.116464	-3.64282	0.0300251	0.139183	-0.287649	1.52252
Ybic	P30178	YBIC_ECOLI	Uncharacterized oxidoreductase YbiC	23.3194	23.3553	0.149546	0.011664	-0.415465	0.717705	0.816266	-0.0359805	0.144054
Ybij	P0AAX3	YBIJ_ECOLI	Uncharacterized protein YbiJ	15.6644	19.7824	1.45799	0.632232	-4.48829	0.0252094	0.126733	-4.11802	1.59844
Ybis	P0AAX8	YBIS_ECOLI	Probable L,D-transpeptidase YbiS	21.0504	21.2191	0.116769	0.275459	-0.976296	0.408179	0.606979	-0.168641	0.389149
Ybit	P0A9U3	YBIT_ECOLI	Uncharacterized ABC transporter ATP-binding protein YbiT	23.2107	23.0678	0.135199	0.178463	1.1054	0.335187	0.542032	0.142889	0.474713
Ybiv	P75792	SUPH_ECOLI	Sugar phosphatase YbiV	19.2853	19.7737	0.505555	0.820088	-0.878124	0.438668	0.624337	-0.488427	0.357864
Ybix	P75779	YBIX_ECOLI	PKHD-type hydroxylase YbiX	18.3727	21.0504	2.77393	0.480112	-1.64744	0.234206	0.436905	-2.67766	0.630402
Ybjd	P75828	YBJD_ECOLI	Uncharacterized protein YbjD	21.5064	21.6577	0.0967817	0.0601606	-2.30011	0.0958933	0.268639	-0.15133	1.01821
Ybjg	P75806	YBJG_ECOLI	Putative undecaprenyl-diphosphatase YbjG	13.1177	17.7172	0.308389	0.436882	-14.8976	0.000231321	0.0124167	-4.59956	3.63578
Ybji	P75809	YBJI_ECOLI	Flavin mononucleotide phosphatase YbjI	19.3379	19.4671	1.29991	1.51909	-0.111959	0.916372	0.952832	-0.129237	0.0379283
Ybjp	P75818	YBJP_ECOLI	Uncharacterized lipoprotein YbjP	20.5413	21.296	0.259211	0.180868	-4.13544	0.0181511	0.106338	-0.75466	1.7411
Ybjx	P75829	YBJX_ECOLI	Uncharacterized protein YbjX	14.1177	18.5398	0.308389	2.3415	-3.24316	0.0796749	0.243712	-4.42218	1.09868
Ycac	P21367	YCAC_ECOLI	Uncharacterized protein YcaC	18.9922	22.5766	0.71707	0.284281	-8.04847	0.00650387	0.0597925	-3.58437	2.18683
Ycao	P75838	YCAO_ECOLI	Ribosomal protein S12 methylthiotransferase accessory factor YcaO	22.6996	22.0643	0.0918361	0.239984	4.28252	0.0316518	0.143903	0.635326	1.4996
Ycar	P0AAZ7	YCAR_ECOLI	UPF0434 protein YcaR	13.1177	12.9971	0.308389	0.0992598	0.644587	0.5752	0.714278	0.120566	0.240181
Ycbb	P22525	YCBB_ECOLI	Probable L,D-transpeptidase YcbB	19.4226	21.0732	0.354401	0.0521242	-7.98088	0.0135487	0.0889519	-1.65057	1.8681
Ycbk	P0AB06	YCBK_ECOLI	Uncharacterized protein YcbK	19.699	19.3042	0.225268	0.190481	2.31751	0.0831764	0.250389	0.394722	1.08
Ycbl	P75849	YCBL_ECOLI	Uncharacterized protein YcbL	22.1924	21.6683	0.308571	0.546123	1.44723	0.239254	0.441374	0.524121	0.621141
Ycbx	P75863	YCBX_ECOLI	Uncharacterized protein YcbX	21.808	21.5731	0.0602393	0.0964587	3.57868	0.0311031	0.142971	0.23497	1.5072
Ycbz	P75867	LONH_ECOLI	Putative Lon protease homolog	19.2822	19.035	0.452937	0.31525	0.775722	0.486081	0.661898	0.247152	0.313291
Yccf	P0AB12	YCCF_ECOLI	Inner membrane protein YccF	16.6194	16.4138	0.111348	0.0676813	2.73355	0.0645441	0.212562	0.205648	1.19014
Yccj	P0AB14	YCCJ_ECOLI	Uncharacterized protein YccJ	17.0183	18.1885	2.737	0.220542	-0.738178	0.536416	0.694021	-1.17026	0.270499
Yccu	P75874	YCCU_ECOLI	Uncharacterized protein YccU	21.4516	22.8345	1.6772	0.142697	-1.42293	0.289065	0.496878	-1.38285	0.539005
Ycdx	P75914	YCDX_ECOLI	Probable phosphatase YcdX	20.797	21.2114	0.250161	0.071541	-2.75817	0.093382	0.264715	-0.414332	1.02974
Ycdy	P75915	YCDY_ECOLI	Chaperone protein YcdY	21.9825	22.0279	0.355697	0.469641	-0.133518	0.90068	0.941414	-0.0454146	0.0454294
Yceb	P0AB26	YCEB_ECOLI	Uncharacterized lipoprotein YceB	19.8457	20.1675	0.567754	0.208704	-0.921616	0.435924	0.622665	-0.321863	0.360589
Yced	P0AB28	YCED_ECOLI	Uncharacterized protein YceD	19.9484	19.651	0.389459	1.02495	0.469888	0.675431	0.787745	0.297455	0.170419
Ycef	P0A729	YCEF_ECOLI	Maf-like protein YceF	20.3697	21.5613	0.410296	0.22382	-4.41622	0.0202072	0.110608	-1.19167	1.69449
Yceg	P28306	YCEG_ECOLI	UPF0755 protein YceG	18.3683	16.2196	0.152746	2.86619	1.29661	0.323584	0.529443	2.14866	0.490013
Yceh	P29217	YCEH_ECOLI	UPF0502 protein YceH	21.9625	22.4474	0.15953	0.0926497	-4.55277	0.0171168	0.104714	-0.48492	1.76658
Ycei	P0A8X2	YCEI_ECOLI	Protein YceI	21.0891	21.2953	0.478784	0.377694	-0.58548	0.591268	0.723044	-0.206137	0.228216
Ycem	P75931	YCEM_ECOLI	Putative oxidoreductase YceM	19.7105	19.7572	0.424009	0.308872	-0.153952	0.885766	0.931678	-0.0466271	0.0526812
Ycfd	P27431	YCFD_ECOLI	50S ribosomal protein L16 arginine hydroxylase	22.1465	22.1156	0.210325	0.39898	0.118453	0.913122	0.95143	0.030845	0.0394714
Ycfh	P0AFQ7	YCFH_ECOLI	Uncharacterized deoxyribonuclease YcfH	19.9812	20.1873	0.603304	0.713826	-0.382005	0.722397	0.817915	-0.206132	0.141224
Ycfp	P0A8E1	YCFP_ECOLI	UPF0227 protein YcfP	22.0528	22.551	0.189002	0.374273	-2.05797	0.133052	0.326065	-0.498185	0.87598
Ycgl	P0AB43	YCGL_ECOLI	Protein YcgL	19.3604	20.0994	0.456884	0.249765	-2.45835	0.0883247	0.254718	-0.739041	1.05392
Ycgm	P76004	YCGM_ECOLI	Uncharacterized protein YcgM	20.2643	22.1236	1.01014	0.244808	-3.09838	0.078473	0.240477	-1.85929	1.10528
Ychf	P0ABU2	YCHF_ECOLI	Ribosome-binding ATPase YchF	23.5899	23.1112	0.146263	0.215249	3.18625	0.0398573	0.163743	0.478734	1.39949
Ychn	P0AB52	YCHN_ECOLI	Protein YchN	20.3999	20.6524	0.839095	0.717822	-0.396111	0.712703	0.811694	-0.252535	0.147091
Ycia	P0A8Z0	YCIA_ECOLI	Acyl-CoA thioester hydrolase YciA	17.8066	16.5316	0.307837	0.239348	5.66322	0.00571379	0.0556437	1.27496	2.24308
Ycii	P0AB55	YCII_ECOLI	Protein YciI	20.1154	21.1762	1.27553	0.370651	-1.38326	0.283969	0.491829	-1.06081	0.54673
Ycik	P31808	YCIK_ECOLI	Uncharacterized oxidoreductase YciK	22.6289	22.6958	0.0384948	0.117976	-0.9335	0.434001	0.622665	-0.066883	0.362509
Ycim	P0AB58	LPSRP_ECOLI	Lipopolysaccharide regulatory protein	17.7966	19.455	0.0351022	0.539324	-5.31451	0.0330259	0.146939	-1.65833	1.48114
Ycin	P0AB61	YCIN_ECOLI	Protein YciN	16.7537	18.7986	0.970653	0.908387	-2.66419	0.0564011	0.19669	-2.04486	1.24871
Ycio	P0AFR4	YCIO_ECOLI	Uncharacterized protein YciO	21.2564	21.4545	0.165978	0.31481	-0.964158	0.405406	0.603936	-0.198106	0.392109
Ycis	P0ACV4	YCIS_ECOLI	Inner membrane protein YciS	18.151	18.2519	0.166651	0.242829	-0.593155	0.588855	0.722074	-0.100859	0.229992
Ycit	P76034	YCIT_ECOLI	Uncharacterized HTH-type transcriptional regulator YciT	20.4653	20.6595	0.482436	0.330629	-0.575116	0.599774	0.730083	-0.194198	0.222013
Yciu	P0A8L7	YCIU_ECOLI	UPF0263 protein YciU	17.1765	17.5889	0.520648	0.818958	-0.73606	0.509349	0.679676	-0.412405	0.292985
Yciw	P76035	YCIW_ECOLI	Uncharacterized protein YciW	17.1375	17.2587	3.18899	3.79826	-0.0423191	0.96833	0.981304	-0.121175	0.0139765
Ycjf	P0A8R7	YCJF_ECOLI	UPF0283 membrane protein YcjF	16.045	17.3397	1.82866	0.787538	-1.12628	0.349611	0.554579	-1.29468	0.456415
Ycjg	P51981	AEEP_ECOLI	L-Ala-D/L-Glu epimerase	19.6111	19.5395	0.340291	0.609811	0.177631	0.869873	0.922542	0.0716176	0.060544
Ycjx	P76046	YCJX_ECOLI	Uncharacterized protein YcjX	20.3084	19.9924	0.195265	0.423064	1.1748	0.329813	0.535424	0.316042	0.481732
Ycjy	P76049	YCJY_ECOLI	Uncharacterized protein YcjY	14.1177	16.8629	0.308389	2.39064	-1.97259	0.183167	0.385224	-2.74521	0.737153
Ydbk	P52647	NIFJ_ECOLI	Probable pyruvate-flavodoxin oxidoreductase	20.7282	18.2741	0.00722165	0.911376	4.66382	0.0430186	0.166276	2.4541	1.36634
Ydcf	P34209	YDCF_ECOLI	Protein YdcF	19.179	19.6295	0.266949	0.622519	-1.15197	0.340715	0.545144	-0.450493	0.467609
Ydch	P0ACW6	YDCH_ECOLI	Uncharacterized protein YdcH	18.4988	14.7466	0.897782	1.27643	4.16467	0.0176081	0.106338	3.75227	1.75429
Ydci	P77171	YDCI_ECOLI	Uncharacterized HTH-type transcriptional regulator YdcI	19.1532	20.2748	1.0928	0.483804	-1.62546	0.210507	0.412678	-1.12156	0.676734
Ydcl	P64451	YDCL_ECOLI	Uncharacterized lipoprotein YdcL	21.6893	22.0398	0.273758	0.23912	-1.67027	0.171476	0.375442	-0.350521	0.765797
Ydcp	P76104	YDCP_ECOLI	Uncharacterized protease YdcP	16.5035	14.5821	1.7833	0.0992598	1.86331	0.202666	0.40729	1.92141	0.693219
Ydcy	P64455	YDCY_ECOLI	Uncharacterized protein YdcY	15.6065	13.9971	2.52424	0.0992598	1.10344	0.384542	0.587068	1.60937	0.415056
Ydei	P31130	YDEI_ECOLI	Uncharacterized protein YdeI	14.1177	20.1122	0.308389	0.538436	-16.7331	0.000327235	0.0139068	-5.99453	3.48514
Ydfg	P39831	YDFG_ECOLI	NADP-dependent 3-hydroxy acid dehydrogenase YdfG	23.2467	23.1277	0.199944	0.16299	0.799102	0.470691	0.649983	0.119013	0.327264
Ydfz	P64463	YDFZ_ECOLI	Putative selenoprotein YdfZ	14.1177	15.3858	0.308389	1.1069	-1.91157	0.178802	0.384898	-1.26814	0.747628
Ydga	P77804	YDGA_ECOLI	Protein YdgA	22.8562	22.6863	0.11744	0.129399	1.68358	0.168217	0.369278	0.169856	0.774131
Ydgh	P76177	YDGH_ECOLI	Protein YdgH	23.6528	23.8609	0.212439	0.209532	-1.20837	0.293466	0.500465	-0.208169	0.532442
Ydgj	P77376	YDGJ_ECOLI	Uncharacterized oxidoreductase YdgJ	22.1741	23.14	0.23919	0.150921	-5.9157	0.0068724	0.0614821	-0.965964	2.16289
Ydhf	P76187	YDHF_ECOLI	Oxidoreductase YdhF	19.8634	20.8519	0.895471	0.099516	-1.9002	0.194718	0.398538	-0.988454	0.710593
Ydhr	P0ACX3	YDHR_ECOLI	Putative monooxygenase YdhR	18.8965	22.1646	0.860563	0.748556	-4.9629	0.0080778	0.0659184	-3.26812	2.09271
Ydih	P64476	YDIH_ECOLI	Uncharacterized protein YdiH	19.2061	21.1781	0.1389	0.557939	-5.94045	0.0205281	0.111267	-1.97198	1.68765
Ydii	P77781	YDII_ECOLI	Esterase YdiI	20.0013	19.7174	0.123619	0.357118	1.30102	0.301233	0.509809	0.283864	0.521098
Ydij	P77748	YDIJ_ECOLI	Uncharacterized protein YdiJ	23.4785	21.1286	0.273283	0.613097	6.06362	0.0113419	0.0792977	2.34992	1.94532
Ydiu	P77649	YDIU_ECOLI	UPF0061 protein YdiU	16.3091	18.3444	2.124	0.0460687	-1.65935	0.238797	0.441374	-2.03533	0.62197
Ydiz	P64479	YDIZ_ECOLI	Uncharacterized protein YdiZ	18.063	20.3102	0.994927	0.513838	-3.47595	0.0402552	0.164178	-2.24722	1.39518
Ydja	P0ACY1	YDJA_ECOLI	Putative NAD(P)H nitroreductase YdjA	22.2328	22.8361	0.482146	0.341472	-1.7686	0.159535	0.355853	-0.603285	0.797144
Ydjn	P77529	YDJN_ECOLI	Uncharacterized symporter YdjN	22.7467	22.5312	0.0125714	0.278779	1.33736	0.312457	0.518891	0.215471	0.50521
Yead	P39173	YEAD_ECOLI	Putative glucose-6-phosphate 1-epimerase	23.7345	23.0133	0.0549687	0.100829	10.8775	0.00144903	0.0295417	0.721205	2.83892
Yeak	P64483	YEAK_ECOLI	Uncharacterized protein YeaK	21.6713	21.9076	0.192587	0.201122	-1.4694	0.21579	0.41799	-0.236233	0.66597
Yeao	P76243	YEAO_ECOLI	Uncharacterized protein YeaO	13.6863	12.9971	0.960621	0.0992598	1.23614	0.339653	0.545144	0.68923	0.468964
Yeay	P0AA91	YEAY_ECOLI	Uncharacterized lipoprotein YeaY	21.1788	21.4311	0.440355	0.273536	-0.842963	0.4553	0.636205	-0.252296	0.341703
Yebc	P0A8A0	YEBC_ECOLI	Probable transcriptional regulatory protein YebC	21.7021	21.9409	0.465892	0.255093	-0.778574	0.491315	0.667386	-0.23876	0.30864
Yebe	P33218	YEBE_ECOLI	Inner membrane protein YebE	18.3425	18.3284	0.466826	1.03729	0.0215674	0.984247	0.990198	0.014164	0.00689579
Yebt	P76272	YEBT_ECOLI	Uncharacterized protein YebT	18.6272	18.3524	0.662855	0.854229	0.440184	0.683869	0.793555	0.274787	0.165027
Yebv	P64503	YEBV_ECOLI	Uncharacterized protein YebV	14.1177	20.3299	0.308389	0.428991	-20.3658	7.08702e-05	0.00536036	-6.21227	4.14954
Yeby	P64506	YEBY_ECOLI	Uncharacterized protein YebY	20.0046	20.3719	0.379269	0.0225727	-1.6743	0.235179	0.43725	-0.367272	0.628601
Yecd	P0ADI7	YECD_ECOLI	Isochorismatase family protein YecD	21.5672	21.9236	0.171771	0.281346	-1.87298	0.149133	0.341814	-0.356458	0.826427
Yecj	P0AD10	YECJ_ECOLI	Uncharacterized protein YecJ	20.3308	19.7428	0.455942	0.672286	1.25367	0.286795	0.494479	0.587958	0.542428
Yecm	P52007	YECM_ECOLI	Protein YecM	21.0743	19.7166	1.46209	0.420531	1.54578	0.244811	0.447163	1.35775	0.611169
Yeen	P0A8A2	YEEN_ECOLI	Probable transcriptional regulatory protein YeeN	20.4487	20.0429	0.465912	0.540009	0.985516	0.381277	0.586718	0.405814	0.41876
Yeex	P0A8M6	YEEX_ECOLI	UPF0265 protein YeeX	23.2505	23.4482	0.0967441	0.352002	-0.93801	0.43594	0.622665	-0.197699	0.360573
Yeez	P0AD12	YEEZ_ECOLI	Protein YeeZ	22.9519	22.9716	0.126451	0.0526465	-0.24888	0.821327	0.884588	-0.0196817	0.0854837
Yegd	P36928	YEGD_ECOLI	Uncharacterized chaperone protein YegD	14.6533	15.1515	2.60487	1.78691	-0.273159	0.799908	0.871686	-0.498178	0.0969599
Yegp	P76402	YEGP_ECOLI	UPF0339 protein YegP	15.9401	19.881	1.13104	0.187125	-5.95405	0.0238449	0.123632	-3.94088	1.6226
Yegq	P76403	YEGQ_ECOLI	Uncharacterized protease YegQ	21.5358	21.4993	0.583346	0.399009	0.0894255	0.933576	0.964289	0.0364896	0.0298504
Yegu	P76418	YEGU_ECOLI	Uncharacterized protein YegU	20.1049	20.0793	0.288291	0.193766	0.127487	0.905535	0.944709	0.0255671	0.0430947
Yegw	P0ACM5	YEGW_ECOLI	Uncharacterized HTH-type transcriptional regulator YegW	15.8845	15.1426	0.988064	1.16462	0.841443	0.448637	0.632654	0.741969	0.348105
Yehs	P33355	YEHS_ECOLI	Uncharacterized protein YehS	19.2915	19.2481	0.228032	0.511191	0.134292	0.90234	0.941988	0.0433989	0.0446296
Yeht	P0AFT5	YEHT_ECOLI	Transcriptional regulatory protein YehT	16.5796	15.6105	0.107187	2.29217	0.731493	0.540287	0.696929	0.969104	0.267375
Yeie	P0ACR4	YEIE_ECOLI	Uncharacterized HTH-type transcriptional regulator YeiE	17.2875	16.9078	0.943157	0.676146	0.56666	0.60416	0.732792	0.379665	0.218848
Yeig	P33018	SFGH2_ECOLI	S-formylglutathione hydrolase YeiG	19.6684	20.1162	0.674365	0.3261	-1.03542	0.379301	0.586718	-0.447794	0.421016
Yeip	P0A6N8	EFPL_ECOLI	Elongation factor P-like protein	21.2528	21.1449	0.332084	0.243565	0.453736	0.675548	0.787745	0.107885	0.170343
Yeiq	P33029	YEIQ_ECOLI	Uncharacterized oxidoreductase YeiQ	15.1177	18.4865	0.308389	0.987178	-5.64192	0.0198201	0.109808	-3.36885	1.7029
Yeiu	P76445	YEIU_ECOLI	Inner membrane protein YeiU	19.168	15.0381	0.28568	3.46533	2.05726	0.174217	0.380442	4.12994	0.75891
Yejk	P33920	NDPA_ECOLI	Nucleoid-associated protein YejK	21.6607	21.5895	0.110198	0.142088	0.68544	0.532912	0.694021	0.0711587	0.273344
Yejl	P0AD24	YEJL_ECOLI	UPF0352 protein YejL	15.8531	14.5821	1.23716	0.0992598	1.77378	0.216499	0.418414	1.27103	0.664544
Yejm	P0AD27	YEJM_ECOLI	Inner membrane protein YejM	20.1807	20.2205	0.357139	0.369198	-0.134183	0.899746	0.941029	-0.0397941	0.0458803
Yfay	P77808	CINAL_ECOLI	NMN amidohydrolase-like protein YfaY	19.0885	19.1367	0.463676	1.12871	-0.0683827	0.950296	0.970714	-0.0481759	0.0221411
Yfbr	P76491	5DNU_ECOLI	5'-deoxynucleotidase YfbR	20.0969	20.362	0.286225	0.25208	-1.20396	0.295956	0.503035	-0.265117	0.528773
Yfbt	P77625	YFBT_ECOLI	Sugar phosphatase YfbT	21.9587	22.0976	0.281341	0.280513	-0.605665	0.577423	0.715876	-0.138925	0.238506
Yfbu	P0A8W8	YFBU_ECOLI	UPF0304 protein YfbU	24.1898	24.4624	0.150482	0.304092	-1.39175	0.260439	0.469015	-0.272627	0.584294
Yfcd	P65556	YFCD_ECOLI	Uncharacterized Nudix hydrolase YfcD	17.4643	17.2097	1.85572	1.82124	0.169598	0.873561	0.925274	0.254596	0.0587067
Yfce	P67095	YFCE_ECOLI	Phosphodiesterase YfcE	18.4811	17.3392	0.348326	2.70612	0.724885	0.541749	0.698273	1.14189	0.266202
Yfcf	P77544	YFCF_ECOLI	Glutathione S-transferase YfcF	19.1867	20.0016	0.353494	0.956186	-1.38444	0.275429	0.485449	-0.814842	0.55999
Yfch	P77775	YFCH_ECOLI	Epimerase family protein YfcH	22.1556	22.4937	0.163218	0.152523	-2.62163	0.0589712	0.202175	-0.338125	1.22936
Yfcl	P64540	YFCL_ECOLI	Uncharacterized protein YfcL	18.9636	16.6384	0.313504	3.06024	1.30919	0.318385	0.523128	2.32523	0.497047
Yfcz	P0AD33	YFCZ_ECOLI	UPF0381 protein YfcZ	14.8911	15.7699	1.61161	2.3207	-0.538736	0.621926	0.748289	-0.878814	0.206262
Yfex	P76536	YFEX_ECOLI	Probable deferrochelatase/peroxidase YfeX	20.7263	21.1745	0.529198	0.128853	-1.42502	0.277733	0.485449	-0.448111	0.556373
Yfey	P76537	YFEY_ECOLI	Uncharacterized protein YfeY	20.874	20.735	0.409105	0.188786	0.534095	0.632557	0.758138	0.138936	0.1989
Yffb	P24178	YFFB_ECOLI	Protein YffB	13.1177	18.1246	0.308389	0.0722535	-27.3798	0.00074943	0.0207842	-5.00693	3.12527
Yfgd	P76569	YFGD_ECOLI	Uncharacterized protein YfgD	21.2238	21.1443	0.374124	0.788256	0.157744	0.88514	0.931678	0.079465	0.0529879
Yfgm	P76576	YFGM_ECOLI	UPF0070 protein YfgM	21.6672	21.335	0.0713558	0.243631	2.266	0.133005	0.326065	0.332126	0.876133
Yfhm	P76578	YFHM_ECOLI	Uncharacterized lipoprotein YfhM	20.1767	21.1161	0.309286	0.0618134	-5.15913	0.0302208	0.139687	-0.939466	1.51969
Yfif	P0AGJ5	YFIF_ECOLI	Uncharacterized tRNA/rRNA methyltransferase YfiF	22.9858	23.3003	0.0461956	0.129355	-3.96559	0.0397174	0.163589	-0.314482	1.40102
Yfip	Q47319	YFIP_ECOLI	DTW domain-containing protein YfiP	18.1751	19.2009	3.21809	1.67477	-0.489735	0.657801	0.774103	-1.02576	0.181905
Yfjd	P37908	YFJD_ECOLI	UPF0053 inner membrane protein YfjD	17.3996	15.1259	2.41858	1.03806	1.49629	0.240694	0.442558	2.27368	0.618534
Yfjw	P52138	YFJW_ECOLI	Uncharacterized protein YfjW	17.2697	21.3331	3.82123	0.138854	-1.84058	0.206706	0.410942	-4.06335	0.684648
Ygam	P0ADQ7	YGAM_ECOLI	Uncharacterized protein YgaM	14.1177	19.755	0.308389	0.861094	-10.6753	0.00375468	0.0473317	-5.63734	2.42543
Ygap	P55734	YGAP_ECOLI	Inner membrane protein YgaP	16.8353	19.6944	0.474201	0.201913	-9.60856	0.00364219	0.0473317	-2.85918	2.43864
Ygau	P0ADE6	YGAU_ECOLI	Uncharacterized protein YgaU	20.6763	23.7239	0.048494	0.0665592	-64.0973	1.03068e-06	0.000285842	-3.04755	5.98688
Ygdh	P0ADR8	YGDH_ECOLI	LOG family protein YgdH	23.2563	23.1005	0.0275004	0.0445017	5.15745	0.0108514	0.0778309	0.155771	1.96451
Ygfb	P0A8C4	YGFB_ECOLI	UPF0149 protein YgfB	19.4055	19.9846	0.0656205	0.121724	-7.25342	0.00499026	0.0525557	-0.579104	2.30188
Ygfz	P0ADE8	YGFZ_ECOLI	tRNA-modifying protein YgfZ	23.2066	24.0085	0.0557598	0.128781	-9.89698	0.00325982	0.0451935	-0.801874	2.48681
Ygge	P0ADS6	YGGE_ECOLI	Uncharacterized protein YggE	20.8685	21.7246	0.629781	0.244796	-2.19464	0.129796	0.322379	-0.856146	0.886738
Yggl	P38521	YGGL_ECOLI	Uncharacterized protein YggL	20.9072	21.3449	0.645685	0.476016	-0.945229	0.402397	0.60211	-0.437774	0.395345
Yggn	P0ADS9	YGGN_ECOLI	Uncharacterized protein YggN	20.7199	19.9199	0.369167	0.0930031	3.63954	0.0566192	0.19669	0.799965	1.24704
Yggs	P67080	YGGS_ECOLI	UPF0001 protein YggS	20.9011	21.1283	0.203408	0.710304	-0.532573	0.640893	0.76393	-0.227184	0.193214
Yggt	P64564	YGGT_ECOLI	Uncharacterized protein YggT	20.9553	20.4676	0.443565	0.348899	1.49664	0.212662	0.414368	0.487639	0.67231
Yggu	P52060	YGGU_ECOLI	UPF0235 protein YggU	15.3275	14.4311	2.01774	2.46034	0.487927	0.652064	0.771717	0.896358	0.18571
Yggx	P0A8P3	FETP_ECOLI	Probable Fe(2+)-trafficking protein	21.6506	23.0129	0.452582	0.656537	-2.95901	0.0482769	0.178122	-1.36229	1.31626
Yghu	Q46845	YGHU_ECOLI	Disulfide-bond oxidoreductase YghU	22.0841	22.5464	0.263555	0.112647	-2.79425	0.0766648	0.237444	-0.462391	1.1154
Yghw	P64574	YGHW_ECOLI	Uncharacterized protein YghW	19.03	19.5925	0.180616	0.556698	-1.66465	0.216029	0.41799	-0.562489	0.665489
Ygib	P0ADT2	YGIB_ECOLI	UPF0441 protein YgiB	17.3525	17.3293	0.215472	0.162321	0.149252	0.889098	0.933241	0.0232464	0.0510503
Ygic	P0ADT5	YGIC_ECOLI	Putative acid--amine ligase YgiC	20.9352	20.7963	0.303756	0.593904	0.36064	0.742421	0.830245	0.138895	0.12935
Ygif	P30871	3PASE_ECOLI	Inorganic triphosphatase	22.1209	22.4043	0.0564786	0.0314334	-7.59351	0.00407869	0.0491808	-0.283374	2.38948
Ygim	P0ADT8	YGIM_ECOLI	Uncharacterized protein YgiM	21.6893	21.0264	0.0742749	0.752488	1.51858	0.265901	0.474771	0.662954	0.575281
Ygin	P0ADU2	YGIN_ECOLI	Probable quinol monooxygenase YgiN	21.6967	22.0355	0.336282	0.250115	-1.39981	0.239699	0.441705	-0.338706	0.620333
Ygiw	P0ADU5	YGIW_ECOLI	Protein YgiW	19.4946	21.2479	1.24969	0.931813	-1.94804	0.128995	0.322251	-1.75323	0.889429
Ygjr	P42599	YGJR_ECOLI	Uncharacterized oxidoreductase YgjR	17.5849	19.4371	3.23277	0.848218	-0.95989	0.427744	0.618926	-1.85222	0.368816
Yhaj	P67660	YHAJ_ECOLI	Uncharacterized HTH-type transcriptional regulator YhaJ	19.9127	20.3804	1.03323	0.12631	-0.778212	0.515838	0.683403	-0.467687	0.287487
Yhbj	P0A894	YHBJ_ECOLI	UPF0042 nucleotide-binding protein YhbJ	21.958	22.525	0.103862	0.134965	-5.76618	0.00544379	0.0550978	-0.566956	2.2641
Yhbs	P63417	YHBS_ECOLI	Uncharacterized N-acetyltransferase YhbS	21.2781	21.4766	0.372774	0.416209	-0.615318	0.572007	0.714278	-0.198494	0.242599
Yhbw	P0ADV5	YHBW_ECOLI	Uncharacterized protein YhbW	22.6435	22.6327	0.0439959	0.0496461	0.281027	0.792818	0.868356	0.010763	0.100826
Yhby	P0AGK4	YHBY_ECOLI	RNA-binding protein YhbY	20.8715	21.1583	0.448523	0.258055	-0.960012	0.403961	0.602862	-0.286809	0.39366
Yhcb	P0ADW3	YHCB_ECOLI	Inner membrane protein YhcB	23.717	23.6966	0.0428131	0.156238	0.218109	0.845208	0.902713	0.0203996	0.0730364
Yhcm	P64612	YHCM_ECOLI	Uncharacterized protein YhcM	20.5054	20.52	0.188991	0.228078	-0.0851863	0.936341	0.964641	-0.014568	0.028566
Yhco	P64616	YHCO_ECOLI	Uncharacterized protein YhcO	13.1177	18.4278	0.308389	0.235879	-23.6893	3.23312e-05	0.00316465	-5.31018	4.49038
Yhde	P25536	YHDE_ECOLI	Maf-like protein YhdE	17.461	16.8488	0.0570983	0.342285	3.05562	0.0864893	0.252885	0.61219	1.06304
Yhdw	P45766	YHDW_ECOLI	Putative amino-acid ABC transporter-binding protein YhdW	22.6772	19.2736	0.463485	0.306098	10.6136	0.000917186	0.02348	3.40359	3.03754
Yhdz	P45769	YHDZ_ECOLI	Uncharacterized amino-acid ABC transporter ATP-binding protein YhdZ	15.3642	13.9971	2.45649	0.0992598	0.963184	0.4368	0.623357	1.36715	0.359718
Yheo	P64624	YHEO_ECOLI	Uncharacterized protein YheO	19.3308	19.9708	0.168207	0.385683	-2.63453	0.0859645	0.252794	-0.640008	1.06568
Yhes	P63389	YHES_ECOLI	Uncharacterized ABC transporter ATP-binding protein YheS	18.7765	17.0506	0.458048	0.97552	2.77375	0.0737553	0.231128	1.72586	1.13221
Yhfa	P0ADX1	YHFA_ECOLI	Protein YhfA	20.0994	20.7173	0.345701	0.3098	-2.30565	0.0832123	0.250389	-0.617934	1.07981
Yhgf	P46837	YHGF_ECOLI	Protein YhgF	22.2699	20.7605	0.806912	0.273157	3.06885	0.0709641	0.226649	1.50938	1.14896
Yhhk	P37613	YHHK_ECOLI	Uncharacterized protein YhhK	19.269	15.5702	0.174102	2.82061	2.26698	0.150599	0.343755	3.69876	0.822177
Yhhw	P46852	YHHW_ECOLI	Quercetin 2,3-dioxygenase	15.9432	18.7794	0.826935	0.261278	-5.66457	0.019467	0.109187	-2.83622	1.7107
Yhhx	P46853	YHHX_ECOLI	Uncharacterized oxidoreductase YhhX	21.3752	21.3118	0.194672	0.32636	0.288681	0.790205	0.866777	0.0633365	0.10226
Yhii	P37626	YHII_ECOLI	Uncharacterized protein YhiI	19.4007	17.7343	0.445549	2.75579	1.03389	0.405186	0.603936	1.66634	0.392346
Yhja	P37197	YHJA_ECOLI	Probable cytochrome c peroxidase	17.02	16.6369	2.68566	2.19684	0.191258	0.857987	0.912262	0.383134	0.0665194
Yhje	P37643	YHJE_ECOLI	Inner membrane metabolite transport protein YhjE	15.1177	21.538	0.308389	0.181353	-31.0832	4.05373e-05	0.00374745	-6.42033	4.39215
Yhjg	P37645	YHJG_ECOLI	Uncharacterized protein YhjG	14.1177	16.7985	0.308389	2.33958	-1.96767	0.183682	0.385224	-2.68083	0.735934
Yhjj	P37648	YHJJ_ECOLI	Protein YhjJ	22.4837	22.7944	0.272374	0.337055	-1.24191	0.284872	0.492239	-0.31072	0.545351
Yhjk	P37649	YHJK_ECOLI	Protein YhjK	13.8051	15.7507	1.1579	0.0674474	-2.90535	0.100075	0.27754	-1.94556	0.999676
Yiad	P37665	YIAD_ECOLI	Probable lipoprotein YiaD	22.1896	20.7151	0.421208	0.565199	3.6231	0.0254911	0.127379	1.47448	1.59361
Yiaf	P0ADK0	YIAF_ECOLI	Uncharacterized protein YiaF	22.0906	21.8291	0.404316	0.827101	0.492047	0.657469	0.774103	0.261537	0.182125
Yiaj	P37671	YIAJ_ECOLI	HTH-type transcriptional regulator YiaJ	18.5719	18.3984	0.0602436	0.653599	0.457842	0.691333	0.798818	0.173502	0.160313
Yibd	P11290	YIBD_ECOLI	Uncharacterized glycosyltransferase YibD	17.5456	21.799	1.34534	0.156607	-5.4393	0.0303401	0.13985	-4.2534	1.51798
Yibf	P0ACA1	YIBF_ECOLI	Uncharacterized GST-like protein YibF	18.2185	18.628	0.470842	0.836113	-0.73916	0.511006	0.680251	-0.409501	0.291574
Yibl	P0ADK8	YIBL_ECOLI	Uncharacterized protein YibL	19.1106	19.4814	0.632963	0.422728	-0.843895	0.452694	0.635682	-0.370847	0.344195
Yibn	P0AG27	YIBN_ECOLI	Uncharacterized protein YibN	22.5091	22.456	0.0472451	0.300584	0.302218	0.789823	0.866777	0.0530915	0.10247
Yibt	Q2M7R5	YIBT_ECOLI	Uncharacterized protein YibT	19.5058	19.0568	1.38975	0.832738	0.480041	0.66148	0.777157	0.449025	0.179483
Yicc	P23839	YICC_ECOLI	UPF0701 protein YicC	22.3575	22.601	0.039214	0.0717056	-5.1604	0.0130309	0.0870821	-0.243496	1.88503
Yich	P31433	YICH_ECOLI	Uncharacterized protein YicH	20.7003	21.0057	0.0266409	0.0607257	-7.97679	0.00564692	0.0556437	-0.305396	2.24819
Yicn	P0ADL3	YICN_ECOLI	Uncharacterized protein YicN	13.6478	15.239	0.897427	0.25976	-2.94998	0.0817388	0.248653	-1.59121	1.08757
Yida	P0A8Y5	YIDA_ECOLI	Sugar phosphatase YidA	22.8075	22.2807	0.153379	0.342901	2.42922	0.100524	0.277859	0.526841	0.997732
Yidb	P09996	YIDB_ECOLI	Uncharacterized protein YidB	14.7026	17.288	0.308389	2.25487	-1.96758	0.183375	0.385224	-2.58534	0.736659
Yidc	P25714	YIDC_ECOLI	Membrane protein insertase YidC	22.6143	22.3102	0.0607662	0.359363	1.44511	0.278922	0.487016	0.304086	0.554517
Yidr	P31455	YIDR_ECOLI	Uncharacterized protein YidR	18.9399	20.5798	0.962095	0.28156	-2.83346	0.0880483	0.254595	-1.63991	1.05528
Yief	P0AGE6	YIEF_ECOLI	Uncharacterized protein YieF	19.806	20.5273	0.403212	0.401955	-2.19425	0.0932492	0.264715	-0.72127	1.03035
Yife	P0ADN2	YIFE_ECOLI	UPF0438 protein YifE	21.2305	21.8156	0.652677	0.51321	-1.22056	0.292722	0.500465	-0.585095	0.533545
Yigb	P0ADP0	YIGB_ECOLI	Flavin mononucleotide phosphatase YigB	19.3821	19.5679	0.22027	0.523371	-0.566622	0.614809	0.741873	-0.185761	0.21126
Yigl	P27848	YIGL_ECOLI	Pyridoxal phosphate phosphatase YigL	19.9992	20.1407	0.687874	1.03069	-0.197811	0.854178	0.908793	-0.141519	0.0684515
Yigp	P0ADP7	YIGP_ECOLI	Uncharacterized protein YigP	15.5944	15.4878	2.85486	2.55837	0.0481751	0.963912	0.978387	0.106624	0.0159625
Yihd	P0ADP9	YIHD_ECOLI	Protein YihD	21.4291	20.9298	0.335053	0.558701	1.32746	0.269338	0.476425	0.499289	0.569702
Yihi	P0A8H6	YIHI_ECOLI	Der GTPase-activating protein YihI	17.0829	17.1988	1.76723	2.17075	-0.0716954	0.94642	0.967943	-0.115866	0.0239159
Yihs	P32140	YIHS_ECOLI	Uncharacterized sugar isomerase YihS	13.1177	18.347	0.308389	0.251903	-22.7465	3.03378e-05	0.00315513	-5.22937	4.51802
Yihx	P0A8Y3	YIHX_ECOLI	Alpha-D-glucose-1-phosphate phosphatase YihX	19.5004	19.4648	0.648738	0.723777	0.063562	0.952403	0.971324	0.0356687	0.0211792
Yiid	P0ADQ2	YIID_ECOLI	Uncharacterized protein YiiD	19.9654	20.0043	0.0906565	0.108951	-0.474409	0.66072	0.776988	-0.0388214	0.179983
Yiim	P32157	YIIM_ECOLI	Protein YiiM	18.3927	20.7423	0.927509	0.829187	-3.27109	0.0313209	0.143181	-2.34959	1.50417
Yjag	P32680	YJAG_ECOLI	Uncharacterized protein YjaG	20.4052	20.5818	0.610234	0.382348	-0.42485	0.696702	0.802292	-0.176637	0.156953
Yjbj	P68206	YJBJ_ECOLI	UPF0337 protein YjbJ	15.3997	21.2934	2.51788	0.322726	-4.02135	0.053658	0.190784	-5.89364	1.27037
Yjbq	P0AF48	YJBQ_ECOLI	UPF0047 protein YjbQ	16.9415	19.0344	2.16099	0.764345	-1.58149	0.229801	0.433547	-2.09293	0.638648
Yjbr	P0AF50	YJBR_ECOLI	Uncharacterized protein YjbR	18.4384	20.2757	0.759371	0.641396	-3.20141	0.0341673	0.149224	-1.83724	1.46639
Yjcd	P0AF52	YJCD_ECOLI	Putative permease YjcD	16.5263	14.8516	2.6787	3.30805	0.681432	0.534526	0.694021	1.67465	0.272032
Yjce	P32703	YJCE_ECOLI	Uncharacterized Na(+)/H(+) exchanger YjcE	17.6473	15.0984	1.26802	0.990476	2.74379	0.0550491	0.19305	2.54888	1.25925
Yjdc	P0ACU7	YJDC_ECOLI	HTH-type transcriptional regulator YjdC	21.0064	21.9154	1.00419	0.419377	-1.44668	0.254108	0.461107	-0.90895	0.594982
Yjei	P0AF70	YJEI_ECOLI	Uncharacterized protein YjeI	18.3612	18.5854	0.449662	0.353646	-0.67893	0.536375	0.694021	-0.224239	0.270531
Yjfp	P39298	YJFP_ECOLI	Esterase YjfP	15.9773	18.3763	2.54929	0.134557	-1.62764	0.244455	0.447004	-2.39895	0.611801
Yjga	P0A8X0	YJGA_ECOLI	UPF0307 protein YjgA	19.6965	20.4491	0.885425	0.207322	-1.43345	0.276478	0.485449	-0.752601	0.55834
Yjgm	P39337	YJGM_ECOLI	Uncharacterized N-acetyltransferase YjgM	18.5328	18.5845	0.398863	0.418515	-0.15484	0.884463	0.931678	-0.0516842	0.0533206
Yjgr	P39342	YJGR_ECOLI	Uncharacterized protein YjgR	20.8942	21.7224	0.220771	0.233919	-4.45949	0.0112496	0.0792977	-0.828145	1.94886
Yjhc	P39353	YJHC_ECOLI	Uncharacterized oxidoreductase YjhC	16.4842	16.1628	0.253785	0.507268	0.981594	0.399969	0.60043	0.321452	0.397974
Yjia	P24203	YJIA_ECOLI	Uncharacterized GTP-binding protein YjiA	21.4999	21.382	0.259122	0.183062	0.643573	0.558555	0.708982	0.117885	0.252934
Yjiy	P39396	YJIY_ECOLI	Inner membrane protein YjiY	20.9529	21.3963	0.145857	0.324617	-2.15818	0.12702	0.321218	-0.443436	0.896128
Yjjk	P0A9W3	YJJK_ECOLI	Uncharacterized ABC transporter ATP-binding protein YjjK	24.3073	24.0068	0.101029	0.314844	1.57385	0.235093	0.43725	0.300456	0.628761
Yjjv	P39408	YJJV_ECOLI	Uncharacterized deoxyribonuclease YjjV	14.2131	17.8302	2.1949	0.157649	-2.84699	0.103202	0.281985	-3.61707	0.986311
Yjjx	P39411	NCPP_ECOLI	Non-canonical purine NTP phosphatase	17.4295	18.6233	4.01066	4.77726	-0.331492	0.757386	0.843004	-1.1938	0.120683
Ykgm	P0A7N1	RL31B_ECOLI	50S ribosomal protein L31 type B	22.8946	23.1843	0.355828	0.381895	-0.961274	0.391103	0.59404	-0.289692	0.407709
Ykgo	Q2EEQ2	RL362_ECOLI	50S ribosomal protein L36 2	17.0049	17.3216	1.56061	0.333974	-0.343729	0.761369	0.8465	-0.316718	0.118405
Ylac	P0AAS0	YLAC_ECOLI	Inner membrane protein YlaC	14.7026	19.3545	0.308389	0.479321	-14.1367	0.000377559	0.0139984	-4.6519	3.42302
Ylba	P75713	YLBA_ECOLI	Uncharacterized protein YlbA	15.4117	16.4255	1.69182	0.415333	-1.00799	0.409699	0.607611	-1.01381	0.387535
Ymba	P0AB10	YMBA_ECOLI	Uncharacterized lipoprotein YmbA	19.8164	19.99	0.198359	0.657247	-0.437971	0.698278	0.802995	-0.173597	0.155972
Ymdb	P0A8D6	YMDB_ECOLI	O-acetyl-ADP-ribose deacetylase	14.7026	18.3367	0.308389	3.15667	-1.98457	0.183228	0.385224	-3.6341	0.737007
Ynca	P76112	YNCA_ECOLI	N-acyltransferase YncA	19.6719	20.4345	0.0355339	0.0970002	-12.7871	0.00231069	0.0376959	-0.762655	2.63626
Ynce	P76116	YNCE_ECOLI	Uncharacterized protein YncE	24.7526	25.4228	0.256083	0.171014	-3.76994	0.0250761	0.126467	-0.670245	1.60074
Ynfb	P76170	YNFB_ECOLI	UPF0482 protein YnfB	19.6705	19.689	0.0830109	0.581286	-0.0547434	0.961146	0.976999	-0.0185586	0.0172107
Ynhg	P76193	YNHG_ECOLI	Probable L,D-transpeptidase YnhG	20.4805	21.511	0.189804	0.208485	-6.33078	0.00328177	0.0451935	-1.03052	2.48389
Ynia	P77739	YNIA_ECOLI	Uncharacterized protein YniA	22.9288	21.6871	0.0844004	0.126842	14.1156	0.000339233	0.0139068	1.24165	3.4695
Ynic	P77247	YNIC_ECOLI	2-deoxyglucose-6-phosphate phosphatase	21.6339	21.4776	0.249918	0.4602	0.516747	0.640099	0.76393	0.156237	0.193753
Yoab	P0AEB7	YOAB_ECOLI	RutC family protein YoaB	20.4979	21.4809	1.05233	0.00442931	-1.61802	0.247062	0.450779	-0.983054	0.607195
Yoae	P0AEC0	YOAE_ECOLI	UPF0053 inner membrane protein YoaE	18.9771	18.688	1.40155	1.20244	0.271181	0.799966	0.871686	0.289127	0.0969287
Yoaf	P64493	YOAF_ECOLI	Uncharacterized protein YoaF	17.9633	15.5678	3.90181	4.42834	0.702989	0.5214	0.686944	2.39547	0.282829
Yobd	P67601	YOBD_ECOLI	UPF0266 membrane protein YobD	16.2429	14.7858	2.4193	1.74836	0.845496	0.449799	0.633756	1.45709	0.346981
Yodb	P76345	C56H_ECOLI	Cytochrome b561 homolog 1	21.5561	21.1672	0.0339098	0.100324	6.36074	0.0140411	0.089519	0.388904	1.8526
Yohf	P33368	YOHF_ECOLI	Uncharacterized oxidoreductase YohF	20.1124	19.6543	0.954922	0.123376	0.824132	0.494077	0.670457	0.458141	0.306206
Yoji	P33941	YOJI_ECOLI	ABC transporter ATP-binding protein YojI	15.8492	17.4792	2.45183	0.128918	-1.14991	0.368566	0.576947	-1.63002	0.433484
Ypfh	P76561	YPFH_ECOLI	Esterase YpfH	18.132	16.1214	3.55161	3.65538	0.683261	0.531995	0.694021	2.01053	0.274093
Ypfj	P64429	YPFJ_ECOLI	Uncharacterized protein YpfJ	16.0714	14.4943	2.78169	2.56969	0.721342	0.510845	0.680251	1.57715	0.291711
Yqab	P77475	YQAB_ECOLI	Fructose-1-phosphate phosphatase YqaB	19.9757	19.6117	0.128986	0.736113	0.84361	0.483235	0.660183	0.363993	0.315842
Yqca	P65367	YQCA_ECOLI	Uncharacterized protein YqcA	18.7399	20.2128	0.531091	0.272111	-4.27519	0.0237795	0.123632	-1.47293	1.6238
Yqef	Q46939	YQEF_ECOLI	Probable acetyl-CoA acetyltransferase	17.7468	17.5124	3.71443	3.8155	0.0762334	0.942897	0.966736	0.234369	0.0255359
Yqfb	P67603	YQFB_ECOLI	UPF0267 protein YqfB	19.7314	20.4452	0.926115	0.436507	-1.20745	0.317938	0.523128	-0.713734	0.497657
Yqge	P0A8W5	YQGE_ECOLI	UPF0301 protein YqgE	20.609	20.5347	0.536748	0.363472	0.198346	0.853705	0.908793	0.0742329	0.0686922
Yqgf	P0A8I1	RUVX_ECOLI	Putative Holliday junction resolvase	18.6576	17.3709	0.868715	2.82795	0.753317	0.518864	0.684962	1.28668	0.284947
Yqha	P67244	YQHA_ECOLI	UPF0114 protein YqhA	16.9913	18.0038	1.02892	0.355754	-1.61076	0.224504	0.428411	-1.01245	0.648776
Yqhd	Q46856	YQHD_ECOLI	Alcohol dehydrogenase YqhD	21.9458	22.7461	0.183936	0.187006	-5.28433	0.00615675	0.0585419	-0.800266	2.21065
Yqia	P0A8Z7	YQIA_ECOLI	Esterase YqiA	16.9364	16.6733	2.67942	2.22229	0.130924	0.902361	0.941988	0.263131	0.0446196
Yqic	Q46868	YQIC_ECOLI	Uncharacterized protein YqiC	20.0044	18.5155	0.0975805	0.666811	3.82649	0.058011	0.20027	1.48882	1.23649
Yqjd	P64581	YQJD_ECOLI	Uncharacterized protein YqjD	20.3133	21.7936	0.134746	0.464079	-5.30574	0.0239383	0.123632	-1.48031	1.62091
Yqjg	P42620	YQJG_ECOLI	Glutathionyl-hydroquinone reductase YqjG	13.1177	14.1236	0.308389	2.04717	-0.84163	0.485251	0.661328	-1.00598	0.314033
Yqjh	Q46871	YQJH_ECOLI	NADPH-dependent ferric-chelate reductase	21.4282	21.8577	0.0913224	0.127677	-4.73869	0.0115043	0.0799488	-0.429467	1.93914
Yqji	P64588	YQJI_ECOLI	Transcriptional regulator YqjI	17.7654	17.6952	0.346748	0.189674	0.307895	0.777705	0.859439	0.0702583	0.109185
Yrap	P64596	YRAP_ECOLI	Uncharacterized protein YraP	22.816	22.4584	0.15607	0.245188	2.13108	0.112391	0.294053	0.357605	0.94927
Yrba	P0A9W6	YRBA_ECOLI	Uncharacterized protein YrbA	20.0616	20.3921	0.907259	1.26788	-0.367121	0.733954	0.826265	-0.330453	0.134331
Yrda	P0A9W9	YRDA_ECOLI	Protein YrdA	22.3159	21.5952	0.593298	0.865585	1.18946	0.307886	0.514447	0.720657	0.51161
Yrff	P45800	IGAA_ECOLI	Putative membrane protein IgaA homolog	16.9291	16.7911	0.581621	0.367432	0.347407	0.74883	0.836277	0.137988	0.125617
Ysga	P56262	DLHH_ECOLI	Putative carboxymethylenebutenolidase	20.761	20.2499	0.136455	0.308925	2.62155	0.0862904	0.252794	0.511157	1.06404
Ytfa	P39309	YTFA_ECOLI	Putative uncharacterized protein YtfA	13.1177	14.4896	0.308389	2.56158	-0.921011	0.451913	0.635448	-1.37195	0.344946
Ytfb	P39310	YTFB_ECOLI	Uncharacterized protein YtfB	18.6334	19.4499	0.281449	0.098785	-4.74118	0.02685	0.132185	-0.816492	1.57106
Ytfe	P69506	YTFE_ECOLI	Iron-sulfur cluster repair protein YtfE	14.1177	16.1296	0.308389	1.75102	-1.95997	0.181576	0.385224	-2.01194	0.740942
Ytfl	P0AE45	YTFL_ECOLI	UPF0053 inner membrane protein YtfL	20.8514	20.9661	0.0685305	0.0713711	-2.00666	0.115353	0.298518	-0.114633	0.937971
Ytfp	P0AE48	YTFP_ECOLI	Gamma-glutamylcyclotransferase family protein YtfP	22.4477	21.2997	0.145414	0.0867219	11.7441	0.000883293	0.0229656	1.148	3.0539
Ytfq	P39325	YTFQ_ECOLI	ABC transporter periplasmic-binding protein YtfQ	19.0779	20.2949	1.73609	0.203344	-1.20595	0.348336	0.553612	-1.21702	0.458001
Zapa	P0ADS2	ZAPA_ECOLI	Cell division protein ZapA	20.3715	20.357	0.0949659	0.429707	0.0571435	0.959213	0.97563	0.0145189	0.018085
Zapb	P0AF36	ZAPB_ECOLI	Cell division protein ZapB	21.0257	20.0321	0.293752	0.26462	4.35252	0.0124243	0.0850256	0.993526	1.90573
Zapd	P36680	ZAPD_ECOLI	Cell division protein ZapD	21.7613	21.6192	0.146227	0.360627	0.632592	0.577488	0.715876	0.142126	0.238457
Zint	P76344	ZINT_ECOLI	Metal-binding protein ZinT	23.745	24.2078	0.710569	0.316598	-1.03048	0.384387	0.587068	-0.462816	0.415232
Zipa	P77173	ZIPA_ECOLI	Cell division protein ZipA	22.0244	22.075	0.17423	0.168854	-0.361386	0.736108	0.826507	-0.0506232	0.133058
Znua	P39172	ZNUA_ECOLI	High-affinity zinc uptake system protein ZnuA	25.2277	25.611	0.238044	0.288863	-1.7734	0.153453	0.347883	-0.383245	0.814024
Znuc	P0A9X1	ZNUC_ECOLI	Zinc import ATP-binding protein ZnuC	21.9086	22.7859	0.0995103	0.0482481	-13.7403	0.00100776	0.0238688	-0.877311	2.99664
Zwf	P0AC53	G6PD_ECOLI	Glucose-6-phosphate 1-dehydrogenase	24.03	25.0475	0.0934942	0.149815	-9.97978	0.00131431	0.0284027	-1.01751	2.8813

## Sheet: MatBC+mal vs MatBC+bio_SigUP
Protein	Protein.Group	Protein.Names	Protein.Description	log2_mean_bioHMatBC_20mmMal	log2_mean_bioHMatBC_biotin	log2_std_bioHMatBC_20mmMal	log2_std_bioHMatBC_biotin	t-test_stat	p-value	p_adjusted(BH)	log2_Fold_change_A/B	Significance
Biod1	P13000	BIOD1_ECOLI	ATP-dependent dethiobiotin synthetase BioD 1	23.737	16.167	0.136601	0.0992598	77.6495	5.19866e-07	0.000242083	7.56998	Significant UP
Malt	P06993	MALT_ECOLI	HTH-type transcriptional regulator MalT	21.6859	14.5821	0.329737	0.0992598	35.7314	0.000278835	0.0136117	7.10385	Significant UP
Glnk	P0AC55	GLNK_ECOLI	Nitrogen regulatory protein P-II 2	24.0347	17.7926	0.44778	1.38658	7.41996	0.0102522	0.0750023	6.24206	Significant UP
Bioa	P12995	BIOA_ECOLI	Adenosylmethionine-8-amino-7-oxononanoate aminotransferase	22.0944	16.167	0.0896385	0.0992598	76.7619	1.97225e-07	0.000242083	5.92736	Significant UP
Rute	P75894	RUTE_ECOLI	Probable malonic semialdehyde reductase RutE	21.9087	15.9971	0.629404	0.0992598	16.0694	0.00312034	0.0442569	5.91156	Significant UP
Rutb	P75897	RUTB_ECOLI	Peroxyureidoacrylate/ureidoacrylate amidohydrolase RutB	20.3716	14.5821	0.903193	0.0992598	11.0362	0.00745196	0.0639178	5.78956	Significant UP
Cydb	P0ABK2	CYDB_ECOLI	Cytochrome bd-I ubiquinol oxidase subunit 2	20.3323	14.5821	0.404715	0.0992598	23.9007	0.000961954	0.0238688	5.75022	Significant UP
Biof	P12998	BIOF_ECOLI	8-amino-7-oxononanoate synthase	22.2994	16.6975	0.0684877	0.0992598	80.4567	6.37656e-07	0.000242083	5.60183	Significant UP
Leud	P30126	LEUD_ECOLI	3-isopropylmalate dehydratase small subunit	23.2716	17.7104	0.206865	1.03735	9.10621	0.00925957	0.071333	5.56123	Significant UP
Sdhd	P0AC44	DHSD_ECOLI	Succinate dehydrogenase hydrophobic membrane anchor subunit	20.0702	14.5821	0.76609	0.0992598	12.3052	0.00577312	0.0558516	5.48813	Significant UP
Amtb	P69681	AMTB_ECOLI	Ammonia channel	20.5214	15.2016	0.331023	2.18214	4.17476	0.0488925	0.179596	5.31979	Significant UP
Riha	P41409	RIHA_ECOLI	Pyrimidine-specific ribonucleoside hydrolase RihA	19.8747	14.5821	0.526207	0.0992598	17.1193	0.00249364	0.0387796	5.29267	Significant UP
Rutc	P0AFQ5	RUTC_ECOLI	Putative aminoacrylate peracid reductase RutC	19.796	14.5821	0.708446	0.0992598	12.624	0.00536353	0.0549725	5.21394	Significant UP
Sdhc	P69054	DHSC_ECOLI	Succinate dehydrogenase cytochrome b556 subunit	20.1389	14.9971	0.0819136	0.0992598	69.2014	4.05657e-07	0.000242083	5.1418	Significant UP
Sdhb	P07014	SDHB_ECOLI	Succinate dehydrogenase iron-sulfur subunit	26.3245	21.2695	0.117557	0.190366	39.1328	1.48588e-05	0.00190193	5.055	Significant UP
Pyri	P0A7F3	PYRI_ECOLI	Aspartate carbamoyltransferase regulatory chain	17.9783	12.9971	1.03381	0.0992598	8.30735	0.0134289	0.0889519	4.9812	Significant UP
Lipa	P60716	LIPA_ECOLI	Lipoyl synthase	18.8655	13.9971	0.721196	0.0992598	11.5831	0.00643342	0.0597183	4.86845	Significant UP
Leuc	P0A6A6	LEUC_ECOLI	3-isopropylmalate dehydratase large subunit	24.4124	19.8204	0.05079	0.304978	25.725	0.00113278	0.0251325	4.59202	Significant UP
Ispg	P62620	ISPG_ECOLI	4-hydroxy-3-methylbut-2-en-1-yl diphosphate synthase	23.4233	18.8548	0.0823542	1.58193	4.99518	0.0374044	0.158657	4.56842	Significant UP
Malf	P02916	MALF_ECOLI	Maltose transport system permease protein MalF	22.2651	17.7917	0.0998136	0.516845	14.7191	0.0033927	0.0454824	4.47334	Significant UP
Ucpa	P37440	UCPA_ECOLI	Oxidoreductase UcpA	18.4307	13.9971	0.699549	0.0992598	10.8686	0.00727063	0.0634726	4.43363	Significant UP
Fuci	P69922	FUCI_ECOLI	L-fucose isomerase	20.4549	16.1339	0.0788416	1.38943	5.37782	0.0324266	0.145412	4.32097	Significant UP
Kate	P21179	CATE_ECOLI	Catalase HPII	18.8154	14.5821	0.123252	0.0992598	46.3336	2.09975e-06	0.000436748	4.23334	Significant UP
Oppd	P76027	OPPD_ECOLI	Oligopeptide transport ATP-binding protein OppD	19.2174	14.9971	0.287901	0.0992598	24.0031	0.000546774	0.0178261	4.22026	Significant UP
Rlmg	P42596	RLMG_ECOLI	Ribosomal RNA large subunit methyltransferase G	19.4242	15.212	0.455003	1.1872	5.73827	0.01575	0.0980908	4.21215	Significant UP
Acnb	P36683	ACON2_ECOLI	Aconitate hydratase 2	26.8822	22.8361	0.0510502	0.0741516	77.8449	7.27411e-07	0.000242083	4.04608	Significant UP
Oppf	P77737	OPPF_ECOLI	Oligopeptide transport ATP-binding protein OppF	20.3937	16.5042	0.0904502	0.791694	8.45421	0.012675	0.0860867	3.88943	Significant UP
Lacz	P00722	BGAL_ECOLI	Beta-galactosidase	22.4522	18.6106	0.0845094	0.26753	23.7164	0.000671634	0.019607	3.84163	Significant UP
Ydch	P0ACW6	YDCH_ECOLI	Uncharacterized protein YdcH	18.4988	14.7466	0.897782	1.27643	4.16467	0.0176081	0.106338	3.75227	Significant UP
Ilvg	P00892	ILVG_ECOLI	Acetolactate synthase isozyme 2 large subunit	20.6881	16.9925	0.0828602	1.47911	4.32081	0.0490606	0.179817	3.6956	Significant UP
Cdsa	P0ABG1	CDSA_ECOLI	Phosphatidate cytidylyltransferase	20.1933	16.6964	0.124444	0.15531	30.4339	1.06366e-05	0.00147494	3.49693	Significant UP
Yhdw	P45766	YHDW_ECOLI	Putative amino-acid ABC transporter-binding protein YhdW	22.6772	19.2736	0.463485	0.306098	10.6136	0.000917186	0.02348	3.40359	Significant UP
Sdaa	P16095	SDHL_ECOLI	L-serine dehydratase 1	17.88	14.5821	0.26163	0.0992598	20.4131	0.000659124	0.019607	3.2979	Significant UP
Uspg	P39177	USPG_ECOLI	Universal stress protein G	22.7773	19.5255	0.122865	1.15216	4.86088	0.0380655	0.160357	3.25178	Significant UP
Gatb	P37188	PTKB_ECOLI	Galactitol-specific phosphotransferase enzyme IIB component	20.4643	17.4426	0.104966	0.112879	33.9542	4.72415e-06	0.000714635	3.02169	Significant UP
Glpq	P09394	GLPQ_ECOLI	Glycerophosphoryl diester phosphodiesterase	16.0053	12.9971	0.533562	0.0992598	9.60047	0.00855179	0.0678849	3.00819	Significant UP
Gatd	P0A9S3	GATD_ECOLI	Galactitol-1-phosphate 5-dehydrogenase	22.0181	19.0314	0.186621	0.296694	14.7594	0.000352948	0.0139068	2.98678	Significant UP
Cusf	P77214	CUSF_ECOLI	Cation efflux system protein CusF	18.7581	15.7963	1.31085	0.960492	3.15672	0.038681	0.161429	2.96177	Significant UP
Malk	P68187	MALK_ECOLI	Maltose/maltodextrin import ATP-binding protein MalK	23.7919	20.8958	0.128026	0.157116	24.7505	2.21291e-05	0.0026302	2.89614	Significant UP
Nuoi	P0AFD6	NUOI_ECOLI	NADH-quinone oxidoreductase subunit I	22.6893	19.802	0.0827359	1.09911	4.53723	0.0443557	0.168127	2.88734	Significant UP
Gata	P69828	PTKA_ECOLI	Galactitol-specific phosphotransferase enzyme IIA component	22.9075	20.0652	0.084645	0.749055	6.53063	0.02125	0.112971	2.84226	Significant UP
Cusa	P38054	CUSA_ECOLI	Cation efflux system protein CusA	20.639	17.8531	0.828549	0.394562	5.25805	0.0150593	0.0942053	2.7859	Significant UP
Nuof	P31979	NUOF_ECOLI	NADH-quinone oxidoreductase subunit F	24.151	21.4329	0.030692	0.982124	4.79138	0.0407488	0.164791	2.71818	Significant UP
Ftna	P0A998	FTNA_ECOLI	Ferritin-1	22.7282	20.0281	0.570596	1.16874	3.59584	0.0389101	0.161866	2.70011	Significant UP
Rimo	P0AEI4	RIMO_ECOLI	Ribosomal protein S12 methylthiotransferase RimO	21.4513	18.8019	0.381936	1.1476	3.79418	0.0457552	0.171094	2.64948	Significant UP
Gltd	P09832	GLTD_ECOLI	Glutamate synthase [NADPH] small chain	25.0529	22.5553	0.0215855	0.228228	18.8708	0.00257704	0.0397056	2.49766	Significant UP
Male	P0AEX9	MALE_ECOLI	Maltose-binding periplasmic protein	26.6354	24.1544	0.204589	0.387184	9.813	0.00213882	0.0366907	2.48101	Significant UP
Ydbk	P52647	NIFJ_ECOLI	Probable pyruvate-flavodoxin oxidoreductase	20.7282	18.2741	0.00722165	0.911376	4.66382	0.0430186	0.166276	2.4541	Significant UP
Raia	P0AD49	RAIA_ECOLI	Ribosome-associated inhibitor A	22.249	19.8342	0.215017	0.39866	9.23426	0.00243765	0.0382665	2.41485	Significant UP
Malm	P03841	MALM_ECOLI	Maltose operon periplasmic protein	23.1293	20.7182	0.414083	0.628009	5.55169	0.00779729	0.0648735	2.41112	Significant UP
Cysh	P17854	CYSH_ECOLI	Phosphoadenosine phosphosulfate reductase	20.717	18.3129	0.197309	0.185804	15.364	0.000107236	0.00701903	2.40409	Significant UP
Hsca	P0A6Z1	HSCA_ECOLI	Chaperone protein HscA	20.5341	18.1401	0.140103	0.970913	4.22685	0.0480962	0.178122	2.39393	Significant UP
Nuob	P0AFC7	NUOB_ECOLI	NADH-quinone oxidoreductase subunit B	22.9445	20.5546	0.212967	0.560731	6.90114	0.0101354	0.0746256	2.38987	Significant UP
Ydij	P77748	YDIJ_ECOLI	Uncharacterized protein YdiJ	23.4785	21.1286	0.273283	0.613097	6.06362	0.0113419	0.0792977	2.34992	Significant UP
Sdha	P0AC41	SDHA_ECOLI	Succinate dehydrogenase flavoprotein subunit	25.0277	22.6983	0.175403	0.246387	13.3403	0.000333393	0.0139068	2.32944	Significant UP
Sodb	P0AGD3	SODF_ECOLI	Superoxide dismutase [Fe]	23.6703	21.343	0.332474	0.393956	7.81975	0.00161774	0.0320467	2.32735	Significant UP
Frda	P00363	FRDA_ECOLI	Fumarate reductase flavoprotein subunit	18.1409	15.8341	0.303095	0.814953	4.59526	0.0275135	0.133596	2.30682	Significant UP
Hybc	P0ACE0	MBHM_ECOLI	Hydrogenase-2 large chain	20.3491	18.197	0.162957	0.863298	4.24276	0.0454237	0.170236	2.15204	Significant UP
Gatz	P0C8J8	GATZ_ECOLI	D-tagatose-1,6-bisphosphate aldolase subunit GatZ	25.7715	23.7	0.127656	0.0323098	27.2478	0.000689751	0.0197887	2.07154	Significant UP
Nuog	P33602	NUOG_ECOLI	NADH-quinone oxidoreductase subunit G	25.0223	22.9608	0.065495	0.185759	18.1279	0.00104314	0.0239202	2.06149	Significant UP
Alda	P25553	ALDA_ECOLI	Lactaldehyde dehydrogenase	22.978	20.9392	0.0373212	0.226961	15.3526	0.00337148	0.0454824	2.03877	Significant UP
Dcta	P0A830	DCTA_ECOLI	Aerobic C4-dicarboxylate transport protein	21.0548	19.0491	0.342103	0.561008	5.28684	0.0102768	0.0750023	2.00567	Significant UP
Malg	P68183	MALG_ECOLI	Maltose transport system permease protein MalG	19.3605	17.3558	0.147913	0.547554	6.12215	0.0183253	0.106338	2.00477	Significant UP
Pfla	P0A9N4	PFLA_ECOLI	Pyruvate formate-lyase 1-activating enzyme	20.7047	18.7012	0.195521	0.67234	4.95603	0.0277619	0.133596	2.00351	Significant UP
Cyda	P0ABJ9	CYDA_ECOLI	Cytochrome bd-I ubiquinol oxidase subunit 1	23.3449	21.397	0.150578	0.272753	10.8289	0.0014195	0.0295255	1.94788	Significant UP
Dppd	P0AAG0	DPPD_ECOLI	Dipeptide transport ATP-binding protein DppD	20.6776	18.7455	0.371771	0.829128	3.68275	0.0395516	0.163589	1.93203	Significant UP
Asna	P00963	ASNA_ECOLI	Aspartate--ammonia ligase	24.453	22.5284	0.136488	0.115881	18.6176	5.92847e-05	0.00469761	1.92454	Significant UP
Mals	P25718	AMY1_ECOLI	Alpha-amylase	17.3936	15.4991	0.445393	0.849541	3.42089	0.0413472	0.164791	1.8945	Significant UP
Fuma	P0AC33	FUMA_ECOLI	Fumarate hydratase class I, aerobic	23.6009	21.7248	0.0631629	0.100829	27.3123	4.5928e-05	0.00396219	1.87615	Significant UP
Ilvc	P05793	ILVC_ECOLI	Ketol-acid reductoisomerase	28.4584	26.5849	0.0477837	0.154965	20.0106	0.00104939	0.0239202	1.87352	Significant UP
Lysp	P25737	LYSP_ECOLI	Lysine-specific permease	20.37	18.517	0.393855	0.337735	6.18599	0.00374312	0.0473317	1.853	Significant UP
Nuoc	P33599	NUOCD_ECOLI	NADH-quinone oxidoreductase subunit C/D	24.857	23.0123	0.0547455	0.183454	16.6889	0.00169172	0.0327329	1.84467	Significant UP
Glna	P0A9C5	GLNA_ECOLI	Glutamine synthetase	26.6091	24.7778	0.142505	0.181319	13.7537	0.000225825	0.0124167	1.83126	Significant UP
Mrr	P24202	MRR_ECOLI	Mrr restriction system protein	18.5666	16.7575	0.717401	0.379651	3.86046	0.030028	0.139183	1.80907	Significant UP
Gltb	P09831	GLTB_ECOLI	Glutamate synthase [NADPH] large chain	26.9788	25.178	0.0790615	0.274819	10.9071	0.00474563	0.0521055	1.80078	Significant UP
Nuoa	P0AFC3	NUOA_ECOLI	NADH-quinone oxidoreductase subunit A	20.6922	18.9247	0.145886	0.349408	8.08548	0.00592439	0.0566563	1.76756	Significant UP
Metj	P0A8U6	METJ_ECOLI	Met repressor	20.1076	18.4213	0.275876	0.363439	6.4012	0.00386989	0.0477	1.68631	Significant UP
Nuoj	P0AFE0	NUOJ_ECOLI	NADH-quinone oxidoreductase subunit J	18.8441	17.2356	0.214183	0.29003	7.72705	0.00210403	0.0365623	1.60846	Significant UP
Succ	P0A836	SUCC_ECOLI	Succinyl-CoA ligase [ADP-forming] subunit beta	26.4185	24.86	0.0236838	0.0393485	58.7735	4.49356e-06	0.000714635	1.55841	Significant UP
Cysi	P17846	CYSI_ECOLI	Sulfite reductase [NADPH] hemoprotein beta-component	25.0187	23.4974	0.0899371	0.121354	17.4453	0.000111552	0.00701903	1.52136	Significant UP
Pcka	P22259	PCKA_ECOLI	Phosphoenolpyruvate carboxykinase [ATP]	24.0264	22.5477	0.0768488	0.183769	12.8573	0.00174959	0.0330831	1.47862	Significant UP
Yiad	P37665	YIAD_ECOLI	Probable lipoprotein YiaD	22.1896	20.7151	0.421208	0.565199	3.6231	0.0254911	0.127379	1.47448	Significant UP
Purf	P0AG16	PUR1_ECOLI	Amidophosphoribosyltransferase	22.8913	21.4414	0.177315	0.444137	5.2512	0.0187002	0.106932	1.44987	Significant UP
Sucb	P0AFG6	ODO2_ECOLI	Dihydrolipoyllysine-residue succinyltransferase component of 2-oxoglutarate dehydrogenase complex	25.0395	23.6332	0.0163807	0.171598	14.1302	0.0046221	0.0516186	1.40628	Significant UP
Sucd	P0AGE9	SUCD_ECOLI	Succinyl-CoA ligase [ADP-forming] subunit alpha	25.4559	24.0562	0.0644317	0.167634	13.4998	0.00184022	0.0336498	1.39975	Significant UP
Ybdh	P45579	YBDH_ECOLI	Uncharacterized oxidoreductase YbdH	21.3453	19.9986	0.342163	0.53514	3.67232	0.028258	0.134297	1.34671	Significant UP
Pspa	P0AFM6	PSPA_ECOLI	Phage shock protein A	23.2009	21.8623	0.0387195	0.193613	11.742	0.00538493	0.0549725	1.33854	Significant UP
Suca	P0AFG3	ODO1_ECOLI	2-oxoglutarate dehydrogenase E1 component	25.6224	24.2847	0.0836768	0.265541	8.32224	0.00804735	0.0659184	1.33773	Significant UP
Leua	P09151	LEU1_ECOLI	2-isopropylmalate synthase	23.7226	22.3935	0.164442	0.253285	7.6232	0.00288179	0.042064	1.32911	Significant UP
Acea	P0A9G6	ACEA_ECOLI	Isocitrate lyase	22.842	21.5394	0.112624	0.392445	5.5259	0.0220593	0.116428	1.30259	Significant UP
Argt	P09551	ARGT_ECOLI	Lysine-arginine-ornithine-binding periplasmic protein	24.9158	23.6255	0.477012	0.259221	4.11685	0.0245806	0.125853	1.29039	Significant UP
Astc	P77581	ASTC_ECOLI	Succinylornithine transaminase	23.594	22.3157	0.389774	0.158493	5.26225	0.0182361	0.106338	1.27835	Significant UP
Ycia	P0A8Z0	YCIA_ECOLI	Acyl-CoA thioester hydrolase YciA	17.8066	16.5316	0.307837	0.239348	5.66322	0.00571379	0.0556437	1.27496	Significant UP
Stpa	P0ACG1	STPA_ECOLI	DNA-binding protein StpA	22.974	21.7094	0.0546657	0.328723	6.57256	0.0194884	0.109187	1.26452	Significant UP
Atpb	P0AB98	ATP6_ECOLI	ATP synthase subunit a	21.2278	19.9707	0.377324	0.318356	4.41029	0.0123454	0.0848871	1.25706	Significant UP
Ynia	P77739	YNIA_ECOLI	Uncharacterized protein YniA	22.9288	21.6871	0.0844004	0.126842	14.1156	0.000339233	0.0139068	1.24165	Significant UP
Ftsp	P26648	FTSP_ECOLI	Cell division protein FtsP	17.4336	16.1927	0.116896	0.478889	4.36018	0.0397025	0.163589	1.24093	Significant UP
Pyre	P0A7E3	PYRE_ECOLI	Orotate phosphoribosyltransferase	21.4747	20.26	0.134743	0.289872	6.58173	0.0085672	0.0678849	1.21469	Significant UP
Dxs	P77488	DXS_ECOLI	1-deoxy-D-xylulose-5-phosphate synthase	21.28	20.0683	0.137935	0.450333	4.45609	0.0339096	0.14888	1.21171	Significant UP
Glti	P37902	GLTI_ECOLI	Glutamate/aspartate periplasmic-binding protein	25.3468	24.1737	0.363786	0.304654	4.28226	0.0136901	0.0889857	1.17315	Significant UP
Cysd	P21156	CYSD_ECOLI	Sulfate adenylyltransferase subunit 2	21.0222	19.852	0.290466	0.284174	4.98757	0.00756614	0.0641874	1.17013	Significant UP
Cusb	P77239	CUSB_ECOLI	Cation efflux system protein CusB	21.1292	19.9652	0.153632	0.290909	6.12835	0.00844475	0.067591	1.16401	Significant UP
Nuol	P33607	NUOL_ECOLI	NADH-quinone oxidoreductase subunit L	21.2795	20.1204	0.423813	0.518842	2.99697	0.0421078	0.165471	1.15919	Significant UP
Ytfp	P0AE48	YTFP_ECOLI	Gamma-glutamylcyclotransferase family protein YtfP	22.4477	21.2997	0.145414	0.0867219	11.7441	0.000883293	0.0229656	1.148	Significant UP
Phna	P0AFJ1	PHNA_ECOLI	Protein PhnA	19.7205	18.6427	0.274903	0.485359	3.3469	0.0408114	0.164791	1.07786	Significant UP
Ndk	P0A763	NDK_ECOLI	Nucleoside diphosphate kinase	24.3079	23.2449	0.108037	0.23655	7.07992	0.00724861	0.0634726	1.06299	Significant UP
Nuoh	P0AFD4	NUOH_ECOLI	NADH-quinone oxidoreductase subunit H	21.2293	20.171	0.115131	0.272366	6.19886	0.0115311	0.0799488	1.05828	Significant UP
Copa	Q59385	COPA_ECOLI	Copper-exporting P-type ATPase A	23.4725	22.417	0.0797457	0.207444	8.22645	0.00644423	0.0597183	1.05556	Significant UP
Hisp	P07109	HISP_ECOLI	Histidine transport ATP-binding protein HisP	19.3198	18.2646	0.373519	0.389839	3.38501	0.0277352	0.133596	1.05515	Significant UP
Cysj	P38038	CYSJ_ECOLI	Sulfite reductase [NADPH] flavoprotein alpha-component	24.4279	23.4012	0.134222	0.271366	5.87392	0.010578	0.0768011	1.0267	Significant UP
Malq	P15977	MALQ_ECOLI	4-alpha-glucanotransferase	23.8282	22.8066	0.107362	0.31477	5.32052	0.0210918	0.112489	1.02161	Significant UP
Glnh	P0AEQ3	GLNH_ECOLI	Glutamine-binding periplasmic protein	24.7551	23.7424	0.357187	0.297517	3.77327	0.0207221	0.111591	1.01271	Significant UP

## Sheet: MatBC+mal vs MatBC+bio_SigDOWN
Protein	Protein.Group	Protein.Names	Protein.Description	log2_mean_bioHMatBC_20mmMal	log2_mean_bioHMatBC_biotin	log2_std_bioHMatBC_20mmMal	log2_std_bioHMatBC_biotin	t-test_stat	p-value	p_adjusted(BH)	log2_Fold_change_A/B	Significance
Acee	P0AFG8	ODP1_ECOLI	Pyruvate dehydrogenase E1 component	26.7158	27.7169	0.0908428	0.173775	-8.84291	0.00298094	0.043133	-1.00111	Significant DOWN
Arcb	P0AEC3	ARCB_ECOLI	Aerobic respiration control sensor protein ArcB	21.0612	22.2813	0.463331	0.0831998	-4.48952	0.0411107	0.164791	-1.22017	Significant DOWN
Baer	P69228	BAER_ECOLI	Transcriptional regulatory protein BaeR	19.9645	21.5626	0.700478	0.3459	-3.54306	0.0399516	0.163743	-1.59807	Significant DOWN
Baes	P30847	BAES_ECOLI	Signal transduction histidine-protein kinase BaeS	14.1177	17.8414	0.308389	0.114843	-19.5995	0.000763338	0.0208229	-3.72378	Significant DOWN
Bass	P30844	BASS_ECOLI	Sensor protein BasS	14.1177	18.2134	0.308389	0.227686	-18.5063	9.10886e-05	0.00631548	-4.09577	Significant DOWN
Brnq	P0AD99	BRNQ_ECOLI	Branched-chain amino acid transport system 2 carrier protein	14.1177	19.3456	0.308389	1.53656	-5.77787	0.023929	0.123632	-5.22795	Significant DOWN
Can	P61517	CAN_ECOLI	Carbonic anhydrase 2	23.9255	25.0768	0.144351	0.232648	-7.28379	0.00367967	0.0473317	-1.15138	Significant DOWN
Cfa	P0A9H7	CFA_ECOLI	Cyclopropane-fatty-acyl-phospholipid synthase	17.6693	24.8839	0.275233	0.114267	-41.9319	7.69002e-05	0.00556356	-7.21464	Significant DOWN
Cira	P17315	CIRA_ECOLI	Colicin I receptor	23.5681	25.1331	0.668195	0.252342	-3.79515	0.0421633	0.165471	-1.56503	Significant DOWN
Cura	P76113	CURA_ECOLI	NADPH-dependent curcumin reductase	20.0888	21.9366	0.0510422	0.0477288	-45.798	1.4279e-06	0.000339433	-1.84776	Significant DOWN
Cuta	P69488	CUTA_ECOLI	Divalent-cation tolerance protein CutA	14.7581	17.8558	1.40777	1.01526	-3.09118	0.0414949	0.164791	-3.09765	Significant DOWN
Cysq	P22255	CYSQ_ECOLI	3'(2'),5'-bisphosphate nucleotidase CysQ	21.4583	22.4991	0.444422	0.177752	-3.76597	0.0411461	0.164791	-1.04072	Significant DOWN
Dada	P0A6J5	DADA_ECOLI	D-amino acid dehydrogenase small subunit	21.0991	24.3885	0.714008	0.127422	-7.85542	0.0132155	0.0879624	-3.28942	Significant DOWN
Dadx	P29012	ALR2_ECOLI	Alanine racemase, catabolic	18.1119	21.793	0.235843	0.523061	-11.1122	0.00218895	0.0367921	-3.68112	Significant DOWN
Deob	P0A6K6	DEOB_ECOLI	Phosphopentomutase	23.2446	24.2894	0.165306	0.0714933	-10.0473	0.00313841	0.0442569	-1.04475	Significant DOWN
Dham	P37349	DHAM_ECOLI	PTS-dependent dihydroxyacetone kinase, phosphotransferase subunit DhaM	20.1733	21.3868	0.476941	0.352227	-3.54486	0.027421	0.133596	-1.21346	Significant DOWN
Dnac	P0AEF0	DNAC_ECOLI	DNA replication protein DnaC	13.1177	16.2989	0.308389	0.0106956	-17.8567	0.00308811	0.0442569	-3.18127	Significant DOWN
Dps	P0ABT2	DPS_ECOLI	DNA protection during starvation protein	23.6141	24.7759	0.336117	0.284874	-4.56733	0.0109387	0.0778321	-1.16184	Significant DOWN
Ecnb	P0ADB7	ECNB_ECOLI	Entericidin B	18.697	20.9305	0.227084	0.310877	-10.0483	0.000851779	0.0224978	-2.23342	Significant DOWN
Edd	P0ADF6	EDD_ECOLI	Phosphogluconate dehydratase	22.0238	23.6392	0.0316522	0.109943	-24.4565	0.000733064	0.0206749	-1.61545	Significant DOWN
Efeo	P0AB24	EFEO_ECOLI	Iron uptake system component EfeO	24.5967	25.8888	0.460764	0.359584	-3.82901	0.0207157	0.111591	-1.29207	Significant DOWN
Efeu	P75901	EFEU_ECOLI	Putative inactive ferrous iron permease EfeU	20.3286	21.8536	0.293335	0.130987	-8.22216	0.00504747	0.0526678	-1.52501	Significant DOWN
Enta	P15047	ENTA_ECOLI	2,3-dihydro-2,3-dihydroxybenzoate dehydrogenase	22.666	23.6777	0.209778	0.221819	-5.73938	0.00460948	0.0516186	-1.01167	Significant DOWN
Entb	P0ADI4	ENTB_ECOLI	Isochorismatase	23.7338	25.1548	0.176631	0.0539391	-13.3266	0.0027752	0.0413844	-1.42098	Significant DOWN
Entc	P0AEJ2	ENTC_ECOLI	Isochorismate synthase EntC	20.7933	22.6776	0.725897	0.0943232	-4.45864	0.0440152	0.167218	-1.88431	Significant DOWN
Entf	P11454	ENTF_ECOLI	Enterobactin synthase component F	24.1724	25.3897	0.069009	0.117221	-15.5013	0.000378563	0.0139984	-1.21739	Significant DOWN
Fbab	P0A991	ALF1_ECOLI	Fructose-bisphosphate aldolase class 1	21.3124	22.3353	0.277936	0.0603477	-6.22943	0.0198394	0.109808	-1.02291	Significant DOWN
Fecr	P23485	FECR_ECOLI	Protein FecR	14.1177	18.8754	0.308389	0.792034	-9.69531	0.00417396	0.0496105	-4.75769	Significant DOWN
Fepa	P05825	FEPA_ECOLI	Ferrienterobactin receptor	25.075	26.8285	0.445914	0.173525	-6.34714	0.0120877	0.0834602	-1.75343	Significant DOWN
Fes	P13039	FES_ECOLI	Enterochelin esterase	19.658	22.0663	0.203969	0.0308644	-20.221	0.00196636	0.035183	-2.40836	Significant DOWN
Fhua	P06971	FHUA_ECOLI	Ferrichrome-iron receptor	22.5572	24.4547	0.856665	0.292104	-3.63112	0.049606	0.181416	-1.89747	Significant DOWN
Fhue	P16869	FHUE_ECOLI	FhuE receptor	21.3869	24.3534	0.836615	0.270854	-5.84292	0.0177798	0.106338	-2.96647	Significant DOWN
Fic	P20605	FIC_ECOLI	Probable adenosine monophosphate-protein transferase fic	15.9714	19.269	1.43797	0.572033	-3.69072	0.0432677	0.166276	-3.29763	Significant DOWN
Fiu	P75780	FIU_ECOLI	Catecholate siderophore receptor Fiu	14.7029	19.0909	1.31236	0.112066	-5.77028	0.0278033	0.133596	-4.38799	Significant DOWN
Fpr	P28861	FENR_ECOLI	Ferredoxin--NADP reductase	20.1453	23.3071	0.476529	0.131215	-11.08	0.00479095	0.0521055	-3.16183	Significant DOWN
Ftsw	P0ABG4	FTSW_ECOLI	Lipid II flippase FtsW	16.0069	17.5996	0.406539	0.534261	-4.10911	0.0169485	0.104453	-1.59271	Significant DOWN
Ftsz	P0A9A6	FTSZ_ECOLI	Cell division protein FtsZ	23.8461	25.1629	0.0487487	0.00704162	-46.3044	0.000357788	0.0139068	-1.31677	Significant DOWN
Fumc	P05042	FUMC_ECOLI	Fumarate hydratase class II	21.8928	24.3389	0.593227	0.0656937	-7.09868	0.0180554	0.106338	-2.44616	Significant DOWN
Gabd	P25526	GABD_ECOLI	Succinate-semialdehyde dehydrogenase [NADP(+)] GabD	20.7582	22.1274	0.31288	0.116887	-7.10077	0.00964819	0.0719937	-1.36928	Significant DOWN
Gabt	P22256	GABT_ECOLI	4-aminobutyrate aminotransferase GabT	20.7587	22.0065	0.330042	0.264626	-5.10891	0.00784776	0.0649685	-1.24778	Significant DOWN
Gcd	P15877	DHG_ECOLI	Quinoprotein glucose dehydrogenase	22.2344	25.0851	0.216201	0.332176	-12.458	0.000557066	0.0178261	-2.85072	Significant DOWN
Glpr	P0ACL0	GLPR_ECOLI	Glycerol-3-phosphate regulon repressor	19.5105	20.8413	0.360877	0.0330102	-6.36053	0.022876	0.119703	-1.33076	Significant DOWN
Gpma	P62707	GPMA_ECOLI	2,3-bisphosphoglycerate-dependent phosphoglycerate mutase	25.2976	26.5234	0.131165	0.249578	-7.5308	0.00470758	0.0521055	-1.22587	Significant DOWN
Grca	P68066	GRCA_ECOLI	Autonomous glycyl radical cofactor	15.9246	19.5253	1.1392	1.11669	-3.90954	0.0174138	0.106141	-3.60073	Significant DOWN
Grxb	P0AC59	GLRX2_ECOLI	Glutaredoxin-2	22.596	23.6498	0.304926	0.24372	-4.67583	0.0106188	0.0768011	-1.05381	Significant DOWN
Gss	P0AES0	GSP_ECOLI	Bifunctional glutathionylspermidine synthetase/amidase	22.1256	23.3176	0.152207	0.111446	-10.9438	0.000624503	0.0192439	-1.19194	Significant DOWN
Gstb	P0ACA7	GSTB_ECOLI	Glutathione S-transferase GstB	23.032	24.1975	0.302729	0.313615	-4.63096	0.0098293	0.0730176	-1.16543	Significant DOWN
Hpf	P0AFX0	HPF_ECOLI	Ribosome hibernation promoting factor	21.3877	22.9629	0.406901	0.418788	-4.67229	0.00952108	0.0719937	-1.57513	Significant DOWN
Iclr	P16528	ICLR_ECOLI	Acetate operon repressor	16.1038	17.4705	0.435605	0.209394	-4.89761	0.0179437	0.106338	-1.36665	Significant DOWN
Ihfa	P0A6X7	IHFA_ECOLI	Integration host factor subunit alpha	23.4555	24.4597	0.195137	0.21696	-5.96008	0.00412112	0.0493349	-1.00411	Significant DOWN
Kbl	P0AB77	KBL_ECOLI	2-amino-3-ketobutyrate coenzyme A ligase	22.7153	23.7947	0.239899	0.15291	-6.57222	0.00483576	0.0522061	-1.07948	Significant DOWN
Kdsc	P0ABZ4	KDSC_ECOLI	3-deoxy-D-manno-octulosonate 8-phosphate phosphatase KdsC	18.5752	20.4253	0.85547	0.65627	-2.97206	0.0445571	0.168507	-1.8501	Significant DOWN
Kefb	P45522	KEFB_ECOLI	Glutathione-regulated potassium-efflux system protein KefB	13.1177	17.0158	0.308389	0.722437	-8.59555	0.00486295	0.0522061	-3.89818	Significant DOWN
Kgtp	P0AEX3	KGTP_ECOLI	Alpha-ketoglutarate permease	14.0721	18.1727	1.60903	0.221653	-4.37274	0.045352	0.170236	-4.10053	Significant DOWN
Lldd	P33232	LLDD_ECOLI	L-lactate dehydrogenase [cytochrome]	17.9687	19.8364	0.23583	0.390685	-7.0886	0.00424582	0.0501067	-1.86764	Significant DOWN
Lpxc	P0A725	LPXC_ECOLI	UDP-3-O-[3-hydroxymyristoyl] N-acetylglucosamine deacetylase	19.0253	20.0548	0.177065	0.28315	-5.33945	0.00958453	0.0719937	-1.02949	Significant DOWN
Lysu	P0A8N5	SYK2_ECOLI	Lysine--tRNA ligase, heat inducible	18.8117	19.9281	0.391427	0.328495	-3.78408	0.0204414	0.1112	-1.11641	Significant DOWN
Mhpt	P77589	MHPT_ECOLI	3-(3-hydroxy-phenyl)propionate transporter	15.4913	19.7922	1.32794	0.790541	-4.8203	0.0140242	0.089519	-4.30096	Significant DOWN
Mnth	P0A769	MNTH_ECOLI	Divalent metal cation transporter MntH	16.5955	21.9678	1.90503	0.162429	-4.86679	0.0385943	0.161429	-5.37225	Significant DOWN
Mqo	P33940	MQO_ECOLI	Malate:quinone oxidoreductase	15.2598	18.9816	0.771492	0.270911	-7.88369	0.00808134	0.0659184	-3.72177	Significant DOWN
Mscs	P0C0S1	MSCS_ECOLI	Small-conductance mechanosensitive channel	22.4068	23.4705	0.362273	0.178608	-4.56177	0.0209671	0.112387	-1.06379	Significant DOWN
Msra	P0A744	MSRA_ECOLI	Peptide methionine sulfoxide reductase MsrA	20.9729	22.5514	0.687785	0.497874	-3.22014	0.036869	0.157234	-1.57855	Significant DOWN
Nrde	P39452	RIR3_ECOLI	Ribonucleoside-diphosphate reductase 2 subunit alpha	19.4853	23.0793	0.853938	0.0104231	-7.28911	0.0182913	0.106338	-3.59395	Significant DOWN
Nrdf	P37146	RIR4_ECOLI	Ribonucleoside-diphosphate reductase 2 subunit beta	19.9927	22.6605	0.252286	0.235522	-13.3883	0.000185246	0.0110089	-2.66781	Significant DOWN
Ompx	P0A917	OMPX_ECOLI	Outer membrane protein X	22.5185	25.9329	1.15168	0.182207	-5.07204	0.0331907	0.147278	-3.41446	Significant DOWN
Osmc	P0C0L2	OSMC_ECOLI	Peroxiredoxin OsmC	17.3518	22.913	1.24686	0.555858	-7.0559	0.0076104	0.0641874	-5.56125	Significant DOWN
Osme	P0ADB1	OSME_ECOLI	Osmotically-inducible lipoprotein E	20.9937	22.4894	0.221463	0.328254	-6.54214	0.00440587	0.0509123	-1.49564	Significant DOWN
Osmf	P33362	OSMF_ECOLI	Putative osmoprotectant uptake system substrate-binding protein OsmF	14.1177	17.6743	0.308389	0.744263	-7.64651	0.00692758	0.0616443	-3.55661	Significant DOWN
Osmy	P0AFH8	OSMY_ECOLI	Osmotically-inducible protein Y	18.3318	22.3559	1.26481	0.527482	-5.08609	0.0192889	0.108831	-4.0241	Significant DOWN
Pbpg	P0AFI5	PBP7_ECOLI	D-alanyl-D-alanine endopeptidase	15.4396	18.7539	0.308389	1.19063	-4.66737	0.0335921	0.148519	-3.31428	Significant DOWN
Pdhr	P0ACL9	PDHR_ECOLI	Pyruvate dehydrogenase complex repressor	18.2291	19.4531	0.342177	0.259519	-4.93631	0.00937444	0.0718851	-1.22395	Significant DOWN
Pflb	P09373	PFLB_ECOLI	Formate acetyltransferase 1	24.6585	26.6785	0.0848347	0.20378	-15.8509	0.00101564	0.0238688	-2.02005	Significant DOWN
Phnb	P16681	PHNB_ECOLI	Protein PhnB	13.1177	17.3595	0.308389	0.796005	-8.60663	0.00568634	0.0556437	-4.24184	Significant DOWN
Poxb	P07003	POXB_ECOLI	Pyruvate dehydrogenase [ubiquinone]	19.7444	23.5931	0.987775	0.0954122	-6.71754	0.020449	0.1112	-3.84879	Significant DOWN
Ppa	P0A7A9	IPYR_ECOLI	Inorganic pyrophosphatase	22.0357	23.4707	0.663723	0.410863	-3.184	0.0430795	0.166276	-1.43496	Significant DOWN
Ppsr	P0A8A4	PSRP_ECOLI	Phosphoenolpyruvate synthase regulatory protein	20.6697	21.8621	0.165938	0.284475	-6.27068	0.00661577	0.0603304	-1.19232	Significant DOWN
Prop	P0C0L7	PROP_ECOLI	Proline/betaine transporter	19.5643	21.6433	0.518188	0.386151	-5.57207	0.00639333	0.0597183	-2.07899	Significant DOWN
Prr	P77674	ABDH_ECOLI	Gamma-aminobutyraldehyde dehydrogenase	19.1068	20.9399	0.341487	0.252843	-7.47263	0.00235395	0.0378702	-1.83317	Significant DOWN
Ptsp	P37177	PT1P_ECOLI	Phosphoenolpyruvate-protein phosphotransferase PtsP	20.5222	21.6284	0.244532	0.0840355	-7.41029	0.00961685	0.0719937	-1.10624	Significant DOWN
Qora	P28304	QOR1_ECOLI	Quinone oxidoreductase 1	20.3507	22.2717	0.698005	0.0695412	-4.74351	0.0401155	0.16401	-1.92107	Significant DOWN
Rmf	P0AFW2	RMF_ECOLI	Ribosome modulation factor	16.5299	21.5389	2.0554	0.491153	-4.1054	0.0452565	0.170236	-5.00898	Significant DOWN
Rraa	P0A8R0	RRAA_ECOLI	Regulator of ribonuclease activity A	22.2906	23.383	0.249867	0.278626	-5.05587	0.0074279	0.0639178	-1.09245	Significant DOWN
Rspa	P38104	RSPA_ECOLI	Starvation-sensing protein RspA	15.4396	20.0639	0.308389	0.791267	-9.4314	0.00446951	0.0512915	-4.6243	Significant DOWN
Slyb	P0A905	SLYB_ECOLI	Outer membrane lipoprotein SlyB	21.7618	23.1198	0.645716	0.368954	-3.16262	0.0468598	0.174831	-1.35793	Significant DOWN
Soda	P00448	SODM_ECOLI	Superoxide dismutase [Mn]	23.2635	26.2599	0.375152	0.33681	-10.294	0.000532616	0.0177254	-2.99635	Significant DOWN
Sodc	P0AGD1	SODC_ECOLI	Superoxide dismutase [Cu-Zn]	18.2476	19.7738	0.313309	0.574878	-4.03761	0.0258183	0.12793	-1.52621	Significant DOWN
Sotb	P31122	SOTB_ECOLI	Sugar efflux transporter	13.1177	17.7849	0.308389	0.300452	-18.7755	4.76225e-05	0.00396219	-4.6672	Significant DOWN
Sra	P68191	SRA_ECOLI	Stationary-phase-induced ribosome-associated protein	18.2175	21.5287	0.0493665	0.162706	-33.7298	0.000314482	0.0139068	-3.31114	Significant DOWN
Sufc	P77499	SUFC_ECOLI	Probable ATP-dependent transporter SufC	21.8621	24.7892	0.0871396	0.192641	-23.9791	0.000260008	0.0131107	-2.92714	Significant DOWN
Sufe	P76194	SUFE_ECOLI	Cysteine desulfuration protein SufE	17.2589	22.1958	1.13861	0.231729	-7.35916	0.0143793	0.0909779	-4.9369	Significant DOWN
Sufs	P77444	SUFS_ECOLI	Cysteine desulfurase	21.5667	24.4055	0.0867047	0.0705897	-43.9779	2.45428e-06	0.000453769	-2.83883	Significant DOWN
Tala	P0A867	TALA_ECOLI	Transaldolase A	20.1804	23.6003	0.862236	0.0911843	-6.83159	0.0195931	0.109406	-3.41981	Significant DOWN
Tate	P0A843	TATE_ECOLI	Sec-independent protein translocase protein TatE	13.1177	20.146	0.308389	0.185985	-33.8028	2.725e-05	0.00302294	-7.02832	Significant DOWN
Tdh	P07913	TDH_ECOLI	L-threonine 3-dehydrogenase	22.0752	23.3229	0.00714588	0.138937	-15.5333	0.00402865	0.0489319	-1.24766	Significant DOWN
Tehb	P25397	TEHB_ECOLI	Tellurite methyltransferase	19.0732	21.7379	0.373832	0.168761	-11.2525	0.00210936	0.0365623	-2.66466	Significant DOWN
Tktb	P33570	TKT2_ECOLI	Transketolase 2	19.8787	23.1566	0.621498	0.141982	-8.90572	0.00901371	0.0701145	-3.2779	Significant DOWN
Tpx	P0A862	TPX_ECOLI	Thiol peroxidase	24.1615	25.4603	0.45463	0.323911	-4.03008	0.0192147	0.108831	-1.29884	Significant DOWN
Uxab	P0A6L7	UXAB_ECOLI	Altronate oxidoreductase	15.4396	20.6631	0.308389	0.12084	-27.3156	0.000286304	0.0136117	-5.22354	Significant DOWN
Uxac	P0A8G3	UXAC_ECOLI	Uronate isomerase	20.075	23.2558	0.286985	0.0682059	-18.677	0.00172205	0.0329367	-3.1808	Significant DOWN
Wrba	P0A8G6	NQOR_ECOLI	NAD(P)H dehydrogenase (quinone)	21.1217	22.8846	0.270285	0.217616	-8.7996	0.00112373	0.0251325	-1.76293	Significant DOWN
Yagu	P0AAA1	YAGU_ECOLI	Inner membrane protein YagU	22.5334	23.741	0.0497076	0.137617	-14.2946	0.00179564	0.0331995	-1.20757	Significant DOWN
Yahk	P75691	YAHK_ECOLI	Aldehyde reductase YahK	18.0151	21.2036	0.939614	0.237189	-5.69878	0.0222714	0.116907	-3.18849	Significant DOWN
Yaho	P75694	YAHO_ECOLI	Uncharacterized protein YahO	16.2151	21.4789	0.901043	0.333165	-9.49043	0.004782	0.0521055	-5.26378	Significant DOWN
Yait	P77199	YAIT_ECOLI	Putative uncharacterized protein YaiT	19.391	22.6531	1.11987	0.249187	-4.92499	0.0320232	0.144801	-3.26216	Significant DOWN
Ybed	P0A8J4	YBED_ECOLI	UPF0250 protein YbeD	18.0627	19.2029	0.269889	0.241696	-5.45092	0.00569677	0.0556437	-1.14017	Significant DOWN
Ybem	P39874	YBEM_ECOLI	Putative hydrolase YbeM	19.4498	20.5071	0.427413	0.127691	-4.10507	0.0410351	0.164791	-1.05724	Significant DOWN
Ybij	P0AAX3	YBIJ_ECOLI	Uncharacterized protein YbiJ	15.6644	19.7824	1.45799	0.632232	-4.48829	0.0252094	0.126733	-4.11802	Significant DOWN
Ybjg	P75806	YBJG_ECOLI	Putative undecaprenyl-diphosphatase YbjG	13.1177	17.7172	0.308389	0.436882	-14.8976	0.000231321	0.0124167	-4.59956	Significant DOWN
Ycac	P21367	YCAC_ECOLI	Uncharacterized protein YcaC	18.9922	22.5766	0.71707	0.284281	-8.04847	0.00650387	0.0597925	-3.58437	Significant DOWN
Ycbb	P22525	YCBB_ECOLI	Probable L,D-transpeptidase YcbB	19.4226	21.0732	0.354401	0.0521242	-7.98088	0.0135487	0.0889519	-1.65057	Significant DOWN
Ycef	P0A729	YCEF_ECOLI	Maf-like protein YceF	20.3697	21.5613	0.410296	0.22382	-4.41622	0.0202072	0.110608	-1.19167	Significant DOWN
Ycim	P0AB58	LPSRP_ECOLI	Lipopolysaccharide regulatory protein	17.7966	19.455	0.0351022	0.539324	-5.31451	0.0330259	0.146939	-1.65833	Significant DOWN
Ydei	P31130	YDEI_ECOLI	Uncharacterized protein YdeI	14.1177	20.1122	0.308389	0.538436	-16.7331	0.000327235	0.0139068	-5.99453	Significant DOWN
Ydhr	P0ACX3	YDHR_ECOLI	Putative monooxygenase YdhR	18.8965	22.1646	0.860563	0.748556	-4.9629	0.0080778	0.0659184	-3.26812	Significant DOWN
Ydih	P64476	YDIH_ECOLI	Uncharacterized protein YdiH	19.2061	21.1781	0.1389	0.557939	-5.94045	0.0205281	0.111267	-1.97198	Significant DOWN
Ydiz	P64479	YDIZ_ECOLI	Uncharacterized protein YdiZ	18.063	20.3102	0.994927	0.513838	-3.47595	0.0402552	0.164178	-2.24722	Significant DOWN
Yebv	P64503	YEBV_ECOLI	Uncharacterized protein YebV	14.1177	20.3299	0.308389	0.428991	-20.3658	7.08702e-05	0.00536036	-6.21227	Significant DOWN
Yegp	P76402	YEGP_ECOLI	UPF0339 protein YegP	15.9401	19.881	1.13104	0.187125	-5.95405	0.0238449	0.123632	-3.94088	Significant DOWN
Yeiq	P33029	YEIQ_ECOLI	Uncharacterized oxidoreductase YeiQ	15.1177	18.4865	0.308389	0.987178	-5.64192	0.0198201	0.109808	-3.36885	Significant DOWN
Yffb	P24178	YFFB_ECOLI	Protein YffB	13.1177	18.1246	0.308389	0.0722535	-27.3798	0.00074943	0.0207842	-5.00693	Significant DOWN
Ygam	P0ADQ7	YGAM_ECOLI	Uncharacterized protein YgaM	14.1177	19.755	0.308389	0.861094	-10.6753	0.00375468	0.0473317	-5.63734	Significant DOWN
Ygap	P55734	YGAP_ECOLI	Inner membrane protein YgaP	16.8353	19.6944	0.474201	0.201913	-9.60856	0.00364219	0.0473317	-2.85918	Significant DOWN
Ygau	P0ADE6	YGAU_ECOLI	Uncharacterized protein YgaU	20.6763	23.7239	0.048494	0.0665592	-64.0973	1.03068e-06	0.000285842	-3.04755	Significant DOWN
Yggx	P0A8P3	FETP_ECOLI	Probable Fe(2+)-trafficking protein	21.6506	23.0129	0.452582	0.656537	-2.95901	0.0482769	0.178122	-1.36229	Significant DOWN
Yhco	P64616	YHCO_ECOLI	Uncharacterized protein YhcO	13.1177	18.4278	0.308389	0.235879	-23.6893	3.23312e-05	0.00316465	-5.31018	Significant DOWN
Yhhw	P46852	YHHW_ECOLI	Quercetin 2,3-dioxygenase	15.9432	18.7794	0.826935	0.261278	-5.66457	0.019467	0.109187	-2.83622	Significant DOWN
Yhje	P37643	YHJE_ECOLI	Inner membrane metabolite transport protein YhjE	15.1177	21.538	0.308389	0.181353	-31.0832	4.05373e-05	0.00374745	-6.42033	Significant DOWN
Yibd	P11290	YIBD_ECOLI	Uncharacterized glycosyltransferase YibD	17.5456	21.799	1.34534	0.156607	-5.4393	0.0303401	0.13985	-4.2534	Significant DOWN
Yihs	P32140	YIHS_ECOLI	Uncharacterized sugar isomerase YihS	13.1177	18.347	0.308389	0.251903	-22.7465	3.03378e-05	0.00315513	-5.22937	Significant DOWN
Yiim	P32157	YIIM_ECOLI	Protein YiiM	18.3927	20.7423	0.927509	0.829187	-3.27109	0.0313209	0.143181	-2.34959	Significant DOWN
Yjbr	P0AF50	YJBR_ECOLI	Uncharacterized protein YjbR	18.4384	20.2757	0.759371	0.641396	-3.20141	0.0341673	0.149224	-1.83724	Significant DOWN
Ylac	P0AAS0	YLAC_ECOLI	Inner membrane protein YlaC	14.7026	19.3545	0.308389	0.479321	-14.1367	0.000377559	0.0139984	-4.6519	Significant DOWN
Ynhg	P76193	YNHG_ECOLI	Probable L,D-transpeptidase YnhG	20.4805	21.511	0.189804	0.208485	-6.33078	0.00328177	0.0451935	-1.03052	Significant DOWN
Yqca	P65367	YQCA_ECOLI	Uncharacterized protein YqcA	18.7399	20.2128	0.531091	0.272111	-4.27519	0.0237795	0.123632	-1.47293	Significant DOWN
Yqjd	P64581	YQJD_ECOLI	Uncharacterized protein YqjD	20.3133	21.7936	0.134746	0.464079	-5.30574	0.0239383	0.123632	-1.48031	Significant DOWN
Zwf	P0AC53	G6PD_ECOLI	Glucose-6-phosphate 1-dehydrogenase	24.03	25.0475	0.0934942	0.149815	-9.97978	0.00131431	0.0284027	-1.01751	Significant DOWN

## Sheet: MatBC+mal vs RFP+bio+mal_Full
Protein	Protein.Group	Protein.Names	Protein.Description	log2_mean_bioHMatBC_20mmMal	log2_mean_bioHRFP_biotin_20mMMal	log2_std_bioHMatBC_20mmMal	log2_std_bioHRFP_biotin_20mMMal	t-test_stat	p-value	p_adjusted(BH)	log2_Fold_change_A/B	negLOG10 pvalue
Biof	P12998	BIOF_ECOLI	8-amino-7-oxononanoate synthase	22.2994	16.842	0.0684877	0.0315968	125.322	2.3273e-06	0.00387263	5.45736	5.63315
Bioa	P12995	BIOA_ECOLI	Adenosylmethionine-8-amino-7-oxononanoate aminotransferase	22.0944	16.3115	0.0896385	0.0315968	105.385	1.31411e-05	0.00756432	5.78289	4.88137
Sucb	P0AFG6	ODO2_ECOLI	Dihydrolipoyllysine-residue succinyltransferase component of 2-oxoglutarate dehydrogenase complex	25.0395	24.7032	0.0163807	0.014132	26.9246	1.36376e-05	0.00756432	0.336303	4.86526
Ruta	P75898	RUTA_ECOLI	Pyrimidine monooxygenase RutA	14.1177	19.1202	0.308389	0.372764	-17.9099	7.31452e-05	0.0304284	-5.00258	4.13581
Lacz	P00722	BGAL_ECOLI	Beta-galactosidase	22.4522	23.6243	0.0845094	0.123278	-13.5824	0.000351854	0.110727	-1.17206	3.45364
Ogt	P0AFH0	OGT_ECOLI	Methylated-DNA--protein-cysteine methyltransferase	17.2311	13.1416	0.171168	0.0315968	40.6944	0.000399256	0.110727	4.08953	3.39875
Pbpg	P0AFI5	PBP7_ECOLI	D-alanyl-D-alanine endopeptidase	15.4396	18.3861	0.308389	0.364989	-10.6805	0.000502491	0.117768	-2.94649	3.29887
Ihfb	P0A6Y1	IHFB_ECOLI	Integration host factor subunit beta	22.8711	23.5298	0.078798	0.0532144	-11.9978	0.000566193	0.117768	-0.658638	3.24704
Wzc	P76387	WZC_ECOLI	Tyrosine-protein kinase wzc	13.1177	20.1338	0.308389	0.679535	-16.2847	0.000752382	0.139107	-7.01613	3.12356
Prpe	P77495	PRPE_ECOLI	Propionate--CoA ligase	28.9519	30.6629	0.136405	0.259514	-10.1084	0.0019851	0.284717	-1.71101	2.70222
Gnd	P00350	6PGD_ECOLI	6-phosphogluconate dehydrogenase, decarboxylating	25.9575	25.6372	0.047118	0.0585301	7.3839	0.00213145	0.284717	0.320325	2.67132
Aspc	P00509	AAT_ECOLI	Aspartate aminotransferase	26.4795	26.3177	0.0178094	0.0282653	8.39333	0.00225401	0.284717	0.161892	2.64704
Tyrb	P04693	TYRB_ECOLI	Aromatic-amino-acid aminotransferase	24.9824	24.6583	0.0590464	0.0559844	6.89799	0.00234015	0.284717	0.324052	2.63076
Glta	P0ABH7	CISY_ECOLI	Citrate synthase	26.0316	25.759	0.050659	0.0465198	6.86445	0.00242145	0.284717	0.272581	2.61592
Xseb	P0A8G9	EX7S_ECOLI	Exodeoxyribonuclease 7 small subunit	21.4921	23.0684	0.12092	0.248796	-9.86996	0.00256656	0.284717	-1.57632	2.59065
Csgd	P52106	CSGD_ECOLI	CsgBAC operon transcriptional regulatory protein	20.4446	22.1456	0.11374	0.263766	-10.2567	0.0029882	0.300717	-1.70097	2.52459
Yagu	P0AAA1	YAGU_ECOLI	Inner membrane protein YagU	22.5334	22.7877	0.0497076	0.0311207	-7.50941	0.00327449	0.300717	-0.254263	2.48486
Meta	P07623	META_ECOLI	Homoserine O-succinyltransferase	23.49	23.0414	0.0785027	0.0387778	8.87353	0.00334692	0.300717	0.448571	2.47536
Matb	U5TSK2	U5TSK2_RHILE	Malonyl CoA synthetase	26.6173	19.4474	0.070362	0.801942	15.4264	0.00391625	0.300717	7.16987	2.40713
Clpb	P63284	CLPB_ECOLI	Chaperone protein ClpB	25.4449	25.882	0.0917889	0.0533141	-7.13179	0.00451106	0.300717	-0.437072	2.34572
Alaa	P0A959	ALAA_ECOLI	Glutamate-pyruvate aminotransferase AlaA	21.3129	21.7318	0.0902965	0.0877979	-5.76037	0.00451665	0.300717	-0.418859	2.34518
Ghrb	P37666	GHRB_ECOLI	Glyoxylate/hydroxypyruvate reductase B	23.053	22.595	0.0881004	0.103522	5.83565	0.00464682	0.300717	0.457996	2.33284
Glpk	P0A6F3	GLPK_ECOLI	Glycerol kinase	22.8848	22.1432	0.129312	0.169003	6.03612	0.00468691	0.300717	0.741598	2.32911
Sodc	P0AGD1	SODC_ECOLI	Superoxide dismutase [Cu-Zn]	18.2476	15.7265	0.313309	0.0315968	13.8669	0.0047613	0.300717	2.5211	2.32227
Ch35j_004633	A0A4V4ND72	A0A4V4ND72_9PEZI	Red fluorescent protein	16.7026	21.1327	0.308389	0.785083	-9.09703	0.004836	0.300717	-4.43011	2.31551
Sufs	P77444	SUFS_ECOLI	Cysteine desulfurase	21.5667	18.8957	0.0867047	0.380995	11.8398	0.00486806	0.300717	2.67095	2.31264
Iscs	P0A6B7	ISCS_ECOLI	Cysteine desulfurase IscS	23.7419	23.2485	0.0907682	0.113775	5.87158	0.00487942	0.300717	0.493395	2.31163
Guac	P60560	GUAC_ECOLI	GMP reductase	22.3845	21.9603	0.0504898	0.0935585	6.9096	0.00574141	0.341204	0.424109	2.24098
Pspa	P0AFM6	PSPA_ECOLI	Phage shock protein A	23.2009	22.764	0.0387195	0.0894139	7.7658	0.00619723	0.344748	0.436869	2.2078
Arof	P00888	AROF_ECOLI	Phospho-2-dehydro-3-deoxyheptonate aldolase, Tyr-sensitive	25.057	24.6387	0.0722645	0.102763	5.76729	0.0062154	0.344748	0.418309	2.20653
Yaho	P75694	YAHO_ECOLI	Uncharacterized protein YahO	16.2151	19.9228	0.901043	0.526237	-6.15456	0.00698422	0.37223	-3.70776	2.15588
Mpra	P0ACR9	MPRA_ECOLI	Transcriptional repressor MprA	21.2438	22.0552	0.19494	0.106191	-6.33154	0.00728108	0.37223	-0.811476	2.1378
Acs	P27550	ACSA_ECOLI	Acetyl-coenzyme A synthetase	22.5641	23.0766	0.125155	0.125978	-4.99849	0.00749926	0.37223	-0.512471	2.12498
Matc	Q9ZIP4	Q9ZIP4_RHILE	Dicarboxylate carrier protein MatC N-terminus family protein	21.8927	15.1416	1.02866	0.0315968	11.3621	0.00760567	0.37223	6.75111	2.11886
Dada	P0A6J5	DADA_ECOLI	D-amino acid dehydrogenase small subunit	21.0991	18.4029	0.714008	0.5262	5.26514	0.00784649	0.373044	2.6962	2.10532
Htpg	P0A6Z3	HTPG_ECOLI	Chaperone protein HtpG	24.6589	25.068	0.065911	0.110189	-5.5183	0.00931367	0.389486	-0.409074	2.03088
Ilvg	P00892	ILVG_ECOLI	Acetolactate synthase isozyme 2 large subunit	20.6881	20.2489	0.0828602	0.121859	5.16237	0.00937185	0.389486	0.439211	2.02817
Gatd	P0A9S3	GATD_ECOLI	Galactitol-1-phosphate 5-dehydrogenase	22.0181	22.7096	0.186621	0.111189	-5.51353	0.00939849	0.389486	-0.691506	2.02694
Dkgb	P30863	DKGB_ECOLI	2,5-diketo-D-gluconic acid reductase B	17.3721	13.1416	0.729546	0.0315968	10.0346	0.00966401	0.389486	4.23056	2.01484
Hspq	P0AB20	HSPQ_ECOLI	Heat shock protein HspQ	13.1177	18.3902	0.308389	1.10307	-7.97332	0.00993918	0.389486	-5.27258	2.00265
Prs	P0A717	KPRS_ECOLI	Ribose-phosphate pyrophosphokinase	24.6023	24.3943	0.0523805	0.0578196	4.6166	0.0101358	0.389486	0.207949	1.99414
Tyra	P07023	TYRA_ECOLI	T-protein	24.6234	24.2893	0.0833352	0.0367249	6.35356	0.0102059	0.389486	0.33406	1.99115
Glnl	P0AFB5	NTRB_ECOLI	Nitrogen regulation protein NR(II)	21.2016	22.2418	0.149413	0.279566	-5.68352	0.0102619	0.389486	-1.04016	1.98877
Reca	P0A7G6	RECA_ECOLI	Protein RecA	23.4331	23.1353	0.0577089	0.0854289	5.00384	0.010444	0.389486	0.297836	1.98113
Feob	P33650	FEOB_ECOLI	Ferrous iron transport protein B	22.3074	19.2936	0.165171	0.634252	7.9645	0.010533	0.389486	3.01376	1.97745
Hiss	P60906	SYH_ECOLI	Histidine--tRNA ligase	24.3929	24.2938	0.0253693	0.0285633	4.49502	0.0112142	0.39871	0.0991442	1.95023
Yhcb	P0ADW3	YHCB_ECOLI	Inner membrane protein YhcB	23.717	23.5	0.0428131	0.0640624	4.8771	0.0114919	0.39871	0.216961	1.93961
Lpda	P0A9P0	DLDH_ECOLI	Dihydrolipoyl dehydrogenase	26.2171	26.0085	0.0444032	0.0620171	4.73722	0.0115013	0.39871	0.208613	1.93925
Fuci	P69922	FUCI_ECOLI	L-fucose isomerase	20.4549	20.7568	0.0788416	0.0336127	-6.10175	0.0118686	0.398896	-0.301935	1.9256
Coaa	P0A6I3	COAA_ECOLI	Pantothenate kinase	19.2497	20.7634	0.398573	0.171637	-6.04153	0.0120105	0.398896	-1.51368	1.92044
Cora	P0ABI4	CORA_ECOLI	Magnesium transport protein CorA	20.2777	19.8431	0.129659	0.0816885	4.91183	0.0122258	0.398896	0.434584	1.91272
Tolr	P0ABV6	TOLR_ECOLI	Protein TolR	20.2174	19.9884	0.0573707	0.0206186	6.50539	0.0124885	0.399632	0.228972	1.90349
Uup	P43672	UUP_ECOLI	ABC transporter ATP-binding protein uup	19.9899	20.7656	0.221951	0.229973	-4.20345	0.0136941	0.429559	-0.775646	1.86347
Biod1	P13000	BIOD1_ECOLI	ATP-dependent dethiobiotin synthetase BioD 1	23.737	17.1042	0.136601	1.40351	8.14696	0.01394	0.429559	6.6328	1.85574
Dnak	P0A6Y8	DNAK_ECOLI	Chaperone protein DnaK	26.2148	26.6703	0.11222	0.145813	-4.2882	0.0146296	0.435572	-0.455539	1.83477
Hslu	P0A6H5	HSLU_ECOLI	ATP-dependent protease ATPase subunit HslU	24.5778	24.7888	0.0592345	0.0654502	-4.14107	0.0146587	0.435572	-0.211051	1.8339
Dadx	P29012	ALR2_ECOLI	Alanine racemase, catabolic	18.1119	19.5356	0.235843	0.438659	-4.95122	0.0150034	0.437994	-1.42369	1.82381
Osme	P0ADB1	OSME_ECOLI	Osmotically-inducible lipoprotein E	20.9937	23.0568	0.221463	0.58347	-5.72558	0.0160025	0.454803	-2.06302	1.79581
Sela	P0A821	SELA_ECOLI	L-seryl-tRNA(Sec) selenium transferase	21.0922	20.4866	0.186947	0.0917179	5.03758	0.0162185	0.454803	0.605639	1.78999
Rplo	P02413	RL15_ECOLI	50S ribosomal protein L15	25.3616	25.5685	0.0686321	0.0455354	-4.35235	0.0164685	0.454803	-0.206967	1.78335
Grol	P0A6F5	CH60_ECOLI	60 kDa chaperonin	26.9993	27.177	0.0546837	0.055183	-3.96056	0.0166725	0.454803	-0.177644	1.778
Ftsz	P0A9A6	FTSZ_ECOLI	Cell division protein FtsZ	23.8461	24.3442	0.0487487	0.141632	-5.75906	0.0174097	0.467253	-0.498041	1.75921
Pfkb	P06999	K6PF2_ECOLI	6-phosphofructokinase isozyme 2	22.7531	21.703	0.135457	0.320637	5.22517	0.017775	0.469486	1.05006	1.75019
Pal	P0A912	PAL_ECOLI	Peptidoglycan-associated lipoprotein	24.3924	23.9687	0.142406	0.0807887	4.48182	0.0184537	0.479795	0.423655	1.73392
Glnp	P0AEQ6	GLNP_ECOLI	Glutamine transport system permease protein GlnP	20.2774	20.6139	0.111152	0.10502	-3.81154	0.0190272	0.483906	-0.336511	1.72062
Ahpf	P35340	AHPF_ECOLI	Alkyl hydroperoxide reductase subunit F	23.7576	23.5276	0.0746703	0.0738738	3.79163	0.0192459	0.483906	0.229938	1.71566
Cysk	P0ABK5	CYSK_ECOLI	Cysteine synthase A	25.0749	25.3277	0.0744979	0.0868465	-3.82634	0.0194842	0.483906	-0.252773	1.71032
Degp	P0C0V0	DEGP_ECOLI	Periplasmic serine endoprotease DegP	24.0224	23.8548	0.055374	0.0557537	3.69453	0.0209372	0.512345	0.167613	1.67908
Yfif	P0AGJ5	YFIF_ECOLI	Uncharacterized tRNA/rRNA methyltransferase YfiF	22.9858	22.7089	0.0461956	0.0948233	4.54688	0.02145	0.517287	0.276893	1.66857
Uvrb	P0A8F8	UVRB_ECOLI	UvrABC system protein B	22.8582	21.2144	0.0311368	0.437824	6.48671	0.0223773	0.531941	1.64384	1.65019
Seca	P10408	SECA_ECOLI	Protein translocase subunit SecA	25.5814	25.1072	0.119726	0.176109	3.85677	0.0230268	0.539672	0.474183	1.63777
Yhbw	P0ADV5	YHBW_ECOLI	Uncharacterized protein YhbW	22.6435	22.2088	0.0439959	0.140082	5.12828	0.0244634	0.557131	0.43473	1.61148
Coda	P25524	CODA_ECOLI	Cytosine deaminase	23.2924	23.7384	0.0942471	0.166051	-4.04542	0.0245287	0.557131	-0.445948	1.61033
Cysd	P21156	CYSD_ECOLI	Sulfate adenylyltransferase subunit 2	21.0222	20.2313	0.290466	0.257071	3.53155	0.0247883	0.557131	0.790878	1.60575
Mscl	P0A742	MSCL_ECOLI	Large-conductance mechanosensitive channel	21.1604	20.5983	0.199938	0.194262	3.492	0.0251111	0.557131	0.56203	1.60013
Ilvb	P08142	ILVB_ECOLI	Acetolactate synthase isozyme 1 large subunit	22.937	23.1997	0.0821331	0.0997401	-3.52073	0.0259243	0.560679	-0.262635	1.58629
Glpx	P0A9C9	GLPX_ECOLI	Fructose-1,6-bisphosphatase 1 class 2	19.1443	18.1255	0.105781	0.337	4.99587	0.0259449	0.560679	1.01879	1.58595
Pykf	P0AD61	KPYK1_ECOLI	Pyruvate kinase I	25.3308	25.2182	0.031757	0.0440668	3.5881	0.0269979	0.57165	0.112523	1.56867
Hemg	P0ACB4	HEMG_ECOLI	Protoporphyrinogen IX dehydrogenase [menaquinone]	18.6593	19.3871	0.258417	0.266626	-3.39512	0.0274418	0.57165	-0.727826	1.56159
Ybbo	P0AFP4	YBBO_ECOLI	Uncharacterized oxidoreductase YbbO	20.2538	19.5179	0.125558	0.275576	4.20929	0.0281056	0.57165	0.735952	1.55121
Elab	P0AEH5	ELAB_ECOLI	Protein ElaB	19.2274	17.7794	0.0558937	0.442607	5.62199	0.0281417	0.57165	1.44805	1.55065
Gdha	P00370	DHE4_ECOLI	NADP-specific glutamate dehydrogenase	24.5078	24.8166	0.110582	0.114073	-3.36674	0.0281702	0.57165	-0.308818	1.55021
Oppf	P77737	OPPF_ECOLI	Oligopeptide transport ATP-binding protein OppF	20.3937	19.8334	0.0904502	0.208693	4.26667	0.0285625	0.572626	0.560295	1.5442
Pura	P0A7D4	PURA_ECOLI	Adenylosuccinate synthetase	25.6006	25.4135	0.031815	0.0709108	4.16907	0.0292286	0.574193	0.187075	1.53419
Pepd	P15288	PEPD_ECOLI	Cytosol non-specific dipeptidase	24.2669	24.0245	0.0406561	0.0917481	4.18376	0.0293308	0.574193	0.242401	1.53268
Nuoi	P0AFD6	NUOI_ECOLI	NADH-quinone oxidoreductase subunit I	22.6893	22.3046	0.0827359	0.153486	3.82168	0.0302492	0.585286	0.384726	1.51929
Yhhk	P37613	YHHK_ECOLI	Uncharacterized protein YhhK	19.269	17.916	0.174102	0.508514	4.35981	0.033085	0.623812	1.35294	1.48037
Ygdh	P0ADR8	YGDH_ECOLI	LOG family protein YgdH	23.2563	23.126	0.0275004	0.0533942	3.75634	0.0331375	0.623812	0.130254	1.47968
Succ	P0A836	SUCC_ECOLI	Succinyl-CoA ligase [ADP-forming] subunit beta	26.4185	26.3066	0.0236838	0.0459668	3.7458	0.033365	0.623812	0.111829	1.47671
Laci	P03023	LACI_ECOLI	Lactose operon repressor	21.3608	20.2961	0.0441669	0.356707	5.13069	0.0337483	0.623968	1.06471	1.47175
Cysb	P0A9F3	CYSB_ECOLI	HTH-type transcriptional regulator CysB	21.7707	22.3147	0.207403	0.0597751	-4.36545	0.0366872	0.670851	-0.544013	1.43549
Malk	P68187	MALK_ECOLI	Maltose/maltodextrin import ATP-binding protein MalK	23.7919	24.0797	0.128026	0.089664	-3.18956	0.0388241	0.695098	-0.28783	1.4109
Leuc	P0A6A6	LEUC_ECOLI	3-isopropylmalate dehydratase large subunit	24.4124	24.2907	0.05079	0.0473946	3.03453	0.0388486	0.695098	0.121708	1.41062
Clpa	P0ABH9	CLPA_ECOLI	ATP-dependent Clp protease ATP-binding subunit ClpA	22.5518	21.899	0.255774	0.277061	2.99876	0.0403158	0.713675	0.652838	1.39453
Fole	P0A6T5	GCH1_ECOLI	GTP cyclohydrolase 1	24.9532	24.1634	0.129399	0.334666	3.81265	0.0410247	0.718581	0.789827	1.38695
Livg	P0A9S7	LIVG_ECOLI	High-affinity branched-chain amino acid transport ATP-binding protein LivG	20.9909	20.4512	0.243881	0.184935	3.05419	0.0415401	0.720028	0.539705	1.38153
Yafd	P0A8U2	YAFD_ECOLI	UPF0294 protein YafD	19.7924	16.7657	0.198532	1.16794	4.42506	0.0427991	0.733834	3.02667	1.36857
Cura	P76113	CURA_ECOLI	NADPH-dependent curcumin reductase	20.0888	20.52	0.0510422	0.177536	-4.04291	0.0432186	0.733834	-0.431187	1.36433
Pgm	P36938	PGM_ECOLI	Phosphoglucomutase	23.7769	23.7119	0.0257814	0.00506264	4.2876	0.0440559	0.735992	0.0650394	1.356
Pepp	P15034	AMPP_ECOLI	Xaa-Pro aminopeptidase	22.7249	22.4849	0.0592182	0.110845	3.30877	0.0442303	0.735992	0.240073	1.35428
Rpoc	P0A8T7	RPOC_ECOLI	DNA-directed RNA polymerase subunit beta'	26.9444	26.446	0.143561	0.235599	3.12888	0.0456988	0.747463	0.498387	1.3401
Glnd	P27249	GLND_ECOLI	Bifunctional uridylyltransferase/uridylyl-removing enzyme	20.9468	20.3589	0.276726	0.14472	3.26052	0.046715	0.747463	0.587862	1.33054
Ibpa	P0C054	IBPA_ECOLI	Small heat shock protein IbpA	24.1185	25.4336	0.103214	0.537387	-4.16286	0.0469588	0.747463	-1.31518	1.32828
Gsib	P75797	GSIB_ECOLI	Glutathione-binding protein GsiB	22.7781	23.687	0.436156	0.263877	-3.08806	0.0475635	0.747463	-0.908861	1.32273
Yfce	P67095	YFCE_ECOLI	Phosphodiesterase YfcE	18.4811	15.4777	0.348326	1.29347	3.88346	0.0484	0.747463	3.00342	1.31515
Potc	P0AFK6	POTC_ECOLI	Spermidine/putrescine transport system permease protein PotC	17.6726	18.0311	0.129615	0.171444	-2.88843	0.0486455	0.747463	-0.358418	1.31296
Yait	P77199	YAIT_ECOLI	Putative uncharacterized protein YaiT	19.391	22.0861	1.11987	0.202773	-4.10179	0.0489867	0.747463	-2.69516	1.30992
Yajo	P77735	YAJO_ECOLI	Uncharacterized oxidoreductase YajO	19.6547	17.7119	0.38066	0.906122	3.42374	0.0493697	0.747463	1.94276	1.30654
Ihfa	P0A6X7	IHFA_ECOLI	Integration host factor subunit alpha	23.4555	23.9231	0.195137	0.0337579	-4.08912	0.049741	0.747463	-0.467531	1.30329
Hrpa	P43329	HRPA_ECOLI	ATP-dependent RNA helicase HrpA	18.9676	19.3954	0.10071	0.205046	-3.24385	0.0497702	0.747463	-0.427837	1.30303
Yiaj	P37671	YIAJ_ECOLI	HTH-type transcriptional regulator YiaJ	18.5719	18.412	0.0602436	0.076736	2.83914	0.050005	0.747463	0.159916	1.30099
Yghw	P64574	YGHW_ECOLI	Uncharacterized protein YghW	19.03	20.003	0.180616	0.45359	-3.45186	0.05031	0.747463	-0.973004	1.29835
Hdha	P0AET8	HDHA_ECOLI	7-alpha-hydroxysteroid dehydrogenase	20.347	19.5788	0.373482	0.191151	3.17161	0.0508721	0.749125	0.768263	1.29352
Pncc	P0A6G3	PNCC_ECOLI	Nicotinamide-nucleotide amidohydrolase PncC	14.9762	18.5819	1.78487	1.03206	-3.02916	0.0517816	0.75583	-3.60579	1.28582
Icia	P0A8S1	ICIA_ECOLI	Chromosome initiation inhibitor	21.6982	21.2366	0.0345095	0.199202	3.95516	0.0530326	0.762282	0.461656	1.27546
Tolq	P0ABU9	TOLQ_ECOLI	Protein TolQ	21.6409	21.1911	0.213205	0.0787965	3.42824	0.0535814	0.762282	0.449894	1.27099
Rseb	P0AFX9	RSEB_ECOLI	Sigma-E factor regulatory protein RseB	20.817	20.3235	0.238121	0.202165	2.73645	0.0535979	0.762282	0.493503	1.27085
Ilvc	P05793	ILVC_ECOLI	Ketol-acid reductoisomerase	28.4584	28.1174	0.0477837	0.158768	3.56316	0.0550534	0.776346	0.341088	1.25922
Ugpq	P10908	UGPQ_ECOLI	Glycerophosphoryl diester phosphodiesterase	19.7739	17.4525	1.051	0.236348	3.73246	0.0558275	0.780647	2.3214	1.25315
Argh	P11447	ARLY_ECOLI	Argininosuccinate lyase	24.9409	24.7864	0.0768564	0.0629569	2.69324	0.056726	0.783302	0.154484	1.24622
Mhpf	P77580	ACDH_ECOLI	Acetaldehyde dehydrogenase	22.5859	23.0466	0.0680312	0.21898	-3.48032	0.0569589	0.783302	-0.460756	1.24444
Ytfp	P0AE48	YTFP_ECOLI	Gamma-glutamylcyclotransferase family protein YtfP	22.4477	22.1677	0.145414	0.0831645	2.89458	0.0584721	0.797521	0.279951	1.23305
Atpa	P0ABB0	ATPA_ECOLI	ATP synthase subunit alpha	27.3043	27.2092	0.0364398	0.0491838	2.69003	0.0596065	0.806384	0.0950677	1.22471
Sufc	P77499	SUFC_ECOLI	Probable ATP-dependent transporter SufC	21.8621	20.2961	0.0871396	0.724705	3.71591	0.0625901	0.818877	1.56597	1.20349
Rpln	P0ADY3	RL14_ECOLI	50S ribosomal protein L14	24.4988	24.7226	0.119658	0.0770565	-2.72434	0.0626798	0.818877	-0.223859	1.20287
Ycbk	P0AB06	YCBK_ECOLI	Uncharacterized protein YcbK	19.699	20.1226	0.225268	0.158546	-2.66391	0.0628859	0.818877	-0.423672	1.20145
Ibpb	P0C058	IBPB_ECOLI	Small heat shock protein IbpB	23.6657	25.0195	0.0786187	0.62996	-3.69347	0.0630862	0.818877	-1.35376	1.20007
Dnae	P10443	DPO3A_ECOLI	DNA polymerase III subunit alpha	18.9707	20.2591	0.212687	0.650521	-3.2604	0.0636616	0.818877	-1.28832	1.19612
Efeb	P31545	EFEB_ECOLI	Deferrochelatase/peroxidase EfeB	20.9062	20.2507	0.262376	0.347024	2.60977	0.0638947	0.818877	0.655509	1.19453
Rpmd	P0AG51	RL30_ECOLI	50S ribosomal protein L30	23.3439	23.6395	0.0753578	0.157166	-2.93672	0.0639748	0.818877	-0.295526	1.19399
Gatc	P69831	PTKC_ECOLI	Galactitol permease IIC component	20.1704	15.885	0.0420614	1.98408	3.74022	0.064541	0.819818	4.28542	1.19016
Gpma	P62707	GPMA_ECOLI	2,3-bisphosphoglycerate-dependent phosphoglycerate mutase	25.2976	24.9681	0.131165	0.177281	2.58778	0.0660058	0.822042	0.329481	1.18042
Amtb	P69681	AMTB_ECOLI	Ammonia channel	20.5214	21.186	0.331023	0.319213	-2.50324	0.066618	0.822042	-0.664612	1.17641
Gntt	P39835	GNTT_ECOLI	High-affinity gluconate transporter	21.1475	21.6311	0.264617	0.180999	-2.61279	0.0671557	0.822042	-0.483618	1.17292
Cpda	P0AEW4	CPDA_ECOLI	3',5'-cyclic adenosine monophosphate phosphodiesterase CpdA	18.9791	19.3855	0.215852	0.0838776	-3.03936	0.0675104	0.822042	-0.406364	1.17063
Dcrb	P0AEE1	DCRB_ECOLI	Protein DcrB	22.7452	22.4462	0.164969	0.106297	2.63877	0.0678632	0.822042	0.298985	1.16837
Pmrd	P37590	PMRD_ECOLI	Signal transduction protein PmrD	18.1698	15.1063	0.949399	1.70151	2.72322	0.0689265	0.822042	3.06347	1.16161
Gsha	P0A6W9	GSH1_ECOLI	Glutamate--cysteine ligase	22.5746	22.2888	0.130295	0.150556	2.48609	0.0690551	0.822042	0.285788	1.1608
Astb	P76216	ASTB_ECOLI	N-succinylarginine dihydrolase	19.5785	20.2739	0.347815	0.343758	-2.46286	0.069486	0.822042	-0.695361	1.1581
Gcd	P15877	DHG_ECOLI	Quinoprotein glucose dehydrogenase	22.2344	21.4803	0.216201	0.419376	2.76849	0.0698415	0.822042	0.75416	1.15589
Cyns	P00816	CYNS_ECOLI	Cyanate hydratase	26.4157	27.2512	0.185792	0.453929	-2.95023	0.0698915	0.822042	-0.835441	1.15558
Tyrr	P07604	TYRR_ECOLI	Transcriptional regulatory protein TyrR	21.1742	22.088	0.511797	0.316103	-2.63115	0.0701502	0.822042	-0.913804	1.15397
Dsbb	P0A6M2	DSBB_ECOLI	Disulfide bond formation protein B	19.0402	18.1221	0.0717467	0.459175	3.42177	0.0708909	0.824912	0.918135	1.14941
Glng	P0AFB8	NTRC_ECOLI	Nitrogen regulation protein NR(I)	22.5181	22.3038	0.110784	0.104659	2.43631	0.0716974	0.825792	0.21437	1.1445
Biob	P12996	BIOB_ECOLI	Biotin synthase	21.34	18.5769	0.136256	1.37335	3.46774	0.0720096	0.825792	2.76309	1.14261
Znuc	P0A9X1	ZNUC_ECOLI	Zinc import ATP-binding protein ZnuC	21.9086	22.1106	0.0995103	0.104415	-2.42517	0.0725046	0.825792	-0.201959	1.13963
Sera	P0A9T0	SERA_ECOLI	D-3-phosphoglycerate dehydrogenase	26.1789	25.8882	0.0538977	0.157832	3.01964	0.073062	0.825792	0.290764	1.13631
Fabi	P0AEK4	FABI_ECOLI	Enoyl-[acyl-carrier-protein] reductase [NADH] FabI	24.9575	24.6584	0.0906678	0.170769	2.67888	0.0739416	0.825792	0.299039	1.13111
Qseb	P52076	QSEB_ECOLI	Transcriptional regulatory protein QseB	15.4719	18.319	1.6306	0.970534	-2.59869	0.0739441	0.825792	-2.84704	1.1311
Tdh	P07913	TDH_ECOLI	L-threonine 3-dehydrogenase	22.0752	21.1074	0.00714588	0.486636	3.44422	0.074899	0.830879	0.96779	1.12552
Fepb	P0AEL6	FEPB_ECOLI	Ferrienterobactin-binding periplasmic protein	23.7895	23.625	0.0633963	0.0947894	2.49742	0.0760732	0.833285	0.164426	1.11877
Ybdl	P77806	YBDL_ECOLI	Methionine aminotransferase	21.1784	20.8619	0.122198	0.182762	2.49292	0.0764207	0.833285	0.316428	1.11679
Nadc	P30011	NADC_ECOLI	Nicotinate-nucleotide pyrophosphorylase [carboxylating]	22.0875	21.5137	0.137379	0.326771	2.80374	0.0768085	0.833285	0.573801	1.11459
Yeak	P64483	YEAK_ECOLI	Uncharacterized protein YeaK	21.6713	20.4285	0.192587	0.678984	3.05002	0.0771189	0.833285	1.24281	1.11284
Csda	Q46925	CSDA_ECOLI	Cysteine desulfurase CsdA	19.3602	15.894	0.95776	2.01439	2.69163	0.07824	0.839944	3.46621	1.10657
Argg	P0A6E4	ASSY_ECOLI	Argininosuccinate synthase	24.9975	24.8506	0.0864574	0.0538467	2.49863	0.0790463	0.843161	0.146934	1.10212
Metn	P30750	METN_ECOLI	Methionine import ATP-binding protein MetN	22.81	22.6635	0.0400514	0.0856922	2.68159	0.0796726	0.844428	0.146446	1.09869
Speb	P60651	SPEB_ECOLI	Agmatinase	20.8358	21.3827	0.322098	0.224697	-2.4122	0.0810292	0.845633	-0.546946	1.09136
Secb	P0AG86	SECB_ECOLI	Protein-export protein SecB	23.047	22.3525	0.414023	0.244507	2.50196	0.0812292	0.845633	0.694565	1.09029
Bglx	P33363	BGLX_ECOLI	Periplasmic beta-glucosidase	23.0493	22.8976	0.0772218	0.0828105	2.32164	0.0813108	0.845633	0.151772	1.08985
Exbb	P0ABU7	EXBB_ECOLI	Biopolymer transport protein ExbB	21.3295	20.5595	0.0579223	0.423236	3.1221	0.0850342	0.878863	0.770012	1.07041
Rlmg	P42596	RLMG_ECOLI	Ribosomal RNA large subunit methyltransferase G	19.4242	18.4972	0.455003	0.538291	2.27791	0.0868269	0.887247	0.926959	1.06135
Clpx	P0A6H1	CLPX_ECOLI	ATP-dependent Clp protease ATP-binding subunit ClpX	22.7485	22.9084	0.0474007	0.0976449	-2.55153	0.0869118	0.887247	-0.159896	1.06092
Dedd	P09549	DEDD_ECOLI	Protein DedD	17.3435	14.7562	1.59189	1.04225	2.35525	0.0884998	0.89315	2.58734	1.05306
Glpq	P09394	GLPQ_ECOLI	Glycerophosphoryl diester phosphodiesterase	16.0053	13.8727	0.533562	1.29681	2.63412	0.0885636	0.89315	2.13261	1.05274
Nade	P18843	NADE_ECOLI	NH(3)-dependent NAD(+) synthetase	23.8723	23.5773	0.0193378	0.165998	3.0575	0.0893787	0.895815	0.29501	1.04877
Narp	P31802	NARP_ECOLI	Nitrate/nitrite response regulator protein NarP	19.3957	20.2026	0.459479	0.0710498	-3.00588	0.0899045	0.895815	-0.806878	1.04622
Metc	P06721	METC_ECOLI	Cystathionine beta-lyase MetC	23.1423	22.7789	0.0492821	0.213298	2.87548	0.0913464	0.897546	0.363436	1.03931
Lysu	P0A8N5	SYK2_ECOLI	Lysine--tRNA ligase, heat inducible	18.8117	19.5333	0.391427	0.40792	-2.21082	0.0916572	0.897546	-0.721617	1.03783
Metk	P0A817	METK_ECOLI	S-adenosylmethionine synthase	25.7638	25.6486	0.0558706	0.0694289	2.23891	0.0918038	0.897546	0.115196	1.03714
Garr	P0ABQ2	GARR_ECOLI	2-hydroxy-3-oxopropionate reductase	20.4948	20.0942	0.0667583	0.239765	2.78798	0.0922358	0.897546	0.400616	1.0351
Glpa	P0A9C0	GLPA_ECOLI	Anaerobic glycerol-3-phosphate dehydrogenase subunit A	17.35	15.4831	0.365483	1.13932	2.7024	0.0934875	0.904398	1.86683	1.02925
Fruk	P0AEW9	K1PF_ECOLI	1-phosphofructokinase	20.5703	20.3427	0.144516	0.0735676	2.43155	0.0940269	0.904398	0.227655	1.02675
Trpc	P00909	TRPC_ECOLI	Tryptophan biosynthesis protein TrpCF	23.8923	23.981	0.0266672	0.0564773	-2.45969	0.0953858	0.911357	-0.0886946	1.02052
Pncb	P18133	PNCB_ECOLI	Nicotinate phosphoribosyltransferase	22.2528	22.5362	0.178487	0.127231	-2.23921	0.0958458	0.911357	-0.283374	1.01843
Dxs	P77488	DXS_ECOLI	1-deoxy-D-xylulose-5-phosphate synthase	21.28	21.066	0.137935	0.0722344	2.37992	0.0970444	0.917511	0.213945	1.01303
Sola	P40874	MTOX_ECOLI	N-methyl-L-tryptophan oxidase	23.3624	23.0051	0.229005	0.100411	2.47465	0.0976881	0.918379	0.357259	1.01016
Dcd	P28248	DCD_ECOLI	Deoxycytidine triphosphate deaminase	21.2035	20.542	0.109959	0.411165	2.69192	0.0996204	0.927138	0.661482	1.00165
Bepa	P66948	BEPA_ECOLI	Beta-barrel assembly-enhancing protease	21.5424	20.9751	0.230214	0.369099	2.25874	0.0997342	0.927138	0.567288	1.00116
Pola	P00582	DPO1_ECOLI	DNA polymerase I	22.4652	22.2912	0.0171527	0.105848	2.8097	0.100841	0.931634	0.173944	0.996362
Yjiy	P39396	YJIY_ECOLI	Inner membrane protein YjiY	20.9529	21.6187	0.145857	0.426106	-2.56071	0.101338	0.931634	-0.665851	0.99423
Nudk	P37128	NUDK_ECOLI	GDP-mannose pyrophosphatase NudK	18.563	17.8602	0.299745	0.462277	2.20958	0.102924	0.941017	0.70285	0.987485
Ycio	P0AFR4	YCIO_ECOLI	Uncharacterized protein YciO	21.2564	20.7075	0.165978	0.362853	2.3826	0.103505	0.941158	0.54888	0.98504
Lysc	P08660	AK3_ECOLI	Lysine-sensitive aspartokinase 3	25.214	25.0648	0.0671461	0.099243	2.15556	0.106836	0.956869	0.149122	0.971282
Fabz	P0A6Q6	FABZ_ECOLI	3-hydroxyacyl-[acyl-carrier-protein] dehydratase FabZ	22.2913	22.7847	0.319453	0.0829272	-2.58948	0.107784	0.956869	-0.493424	0.967446
Ychf	P0ABU2	YCHF_ECOLI	Ribosome-binding ATPase YchF	23.5899	23.2548	0.146263	0.225356	2.16041	0.108171	0.956869	0.335103	0.965887
Rsep	P0AEH1	RSEP_ECOLI	Regulator of sigma-E protease RseP	19.353	19.4983	0.0683694	0.0968015	-2.12313	0.108685	0.956869	-0.14527	0.963831
Mak	P23917	MAK_ECOLI	Fructokinase	24.6991	25.4283	0.228185	0.494664	-2.31852	0.109	0.956869	-0.729213	0.962575
Muke	P22524	MUKE_ECOLI	Chromosome partition protein MukE	21.0882	20.5009	0.0659095	0.37483	2.67285	0.109035	0.956869	0.5873	0.962436
Yccf	P0AB12	YCCF_ECOLI	Inner membrane protein YccF	16.6194	16.9232	0.111348	0.208912	-2.22289	0.111235	0.956869	-0.303821	0.953759
Cysg	P0AEA8	CYSG_ECOLI	Siroheme synthase	21.0425	20.4046	0.0288242	0.407811	2.70261	0.112781	0.956869	0.637916	0.947765
Liga	P15042	DNLJ_ECOLI	DNA ligase	20.5533	21.2428	0.467835	0.333452	-2.0788	0.113557	0.956869	-0.689521	0.944788
Purm	P08178	PUR5_ECOLI	Phosphoribosylformylglycinamidine cyclo-ligase	24.0546	23.8784	0.0798009	0.121303	2.10154	0.114298	0.956869	0.176173	0.941963
Fur	P0A9A9	FUR_ECOLI	Ferric uptake regulation protein	21.9424	22.4435	0.348757	0.201398	-2.15524	0.11446	0.956869	-0.50113	0.941346
Ydgj	P77376	YDGJ_ECOLI	Uncharacterized oxidoreductase YdgJ	22.1741	21.8288	0.23919	0.10087	2.30366	0.114753	0.956869	0.345259	0.940235
Deob	P0A6K6	DEOB_ECOLI	Phosphopentomutase	23.2446	22.9251	0.165306	0.214748	2.04222	0.11524	0.956869	0.319534	0.938395
Ptra	P05458	PTRA_ECOLI	Protease 3	19.4634	20.5704	0.761437	0.258908	-2.38411	0.116329	0.956869	-1.10702	0.934311
Ycis	P0ACV4	YCIS_ECOLI	Inner membrane protein YciS	18.151	18.4325	0.166651	0.177925	-1.99971	0.116456	0.956869	-0.281456	0.93384
Trps	P00954	SYW_ECOLI	Tryptophan--tRNA ligase	23.9658	23.4489	0.109263	0.354315	2.41492	0.117039	0.956869	0.516961	0.931668
Thrc	P00934	THRC_ECOLI	Threonine synthase	24.4846	24.2857	0.0608637	0.139941	2.25748	0.117902	0.956869	0.198897	0.92848
Cyda	P0ABJ9	CYDA_ECOLI	Cytochrome bd-I ubiquinol oxidase subunit 1	23.3449	23.7915	0.150578	0.315659	-2.21183	0.118094	0.956869	-0.446612	0.927772
Sdhb	P07014	SDHB_ECOLI	Succinate dehydrogenase iron-sulfur subunit	26.3245	26.6139	0.117557	0.20464	-2.12444	0.118252	0.956869	-0.289468	0.927192
Mals	P25718	AMY1_ECOLI	Alpha-amylase	17.3936	18.024	0.445393	0.262921	-2.11139	0.118394	0.956869	-0.630481	0.92667
Rpmg	P0A7N9	RL33_ECOLI	50S ribosomal protein L33	21.2732	22.1774	0.633398	0.424613	-2.05386	0.119259	0.956869	-0.904234	0.923509
Lpxc	P0A725	LPXC_ECOLI	UDP-3-O-[3-hydroxymyristoyl] N-acetylglucosamine deacetylase	19.0253	19.2846	0.177065	0.0411648	-2.47045	0.119973	0.956869	-0.259286	0.920916
Secy	P0AGA2	SECY_ECOLI	Protein translocase subunit SecY	21.9358	21.5023	0.247226	0.290701	1.96751	0.122337	0.956869	0.43349	0.912443
Prr	P77674	ABDH_ECOLI	Gamma-aminobutyraldehyde dehydrogenase	19.1068	17.2278	0.341487	1.30953	2.40479	0.122962	0.956869	1.87896	0.910231
Yhjk	P37649	YHJK_ECOLI	Protein YhjK	13.8051	15.4627	1.1579	0.311346	-2.39443	0.123072	0.956869	-1.65757	0.909841
Yeby	P64506	YEBY_ECOLI	Uncharacterized protein YebY	20.0046	20.7294	0.379269	0.506808	-1.98316	0.123978	0.956869	-0.724779	0.906655
Thii	P77718	THII_ECOLI	tRNA sulfurtransferase	21.8826	21.6509	0.15932	0.127918	1.96402	0.124297	0.956869	0.231681	0.905539
Arge	P23908	ARGE_ECOLI	Acetylornithine deacetylase	23.0005	22.7103	0.0616992	0.20602	2.33754	0.125156	0.956869	0.290241	0.902548
Kbl	P0AB77	KBL_ECOLI	2-amino-3-ketobutyrate coenzyme A ligase	22.7153	21.5756	0.239899	0.811185	2.33349	0.125951	0.956869	1.13965	0.899797
Ycem	P75931	YCEM_ECOLI	Putative oxidoreductase YceM	19.7105	18.5737	0.424009	0.835067	2.1024	0.127285	0.956869	1.1368	0.895222
Ybib	P30177	YBIB_ECOLI	Uncharacterized protein YbiB	22.8601	22.6544	0.0717063	0.151094	2.12977	0.127536	0.956869	0.205649	0.894366
Pstb	P0AAH0	PSTB_ECOLI	Phosphate import ATP-binding protein PstB	19.7088	19.2967	0.11948	0.300849	2.20452	0.127749	0.956869	0.412006	0.893641
Rpsc	P0A7V3	RS3_ECOLI	30S ribosomal protein S3	25.7691	25.9862	0.0536999	0.15787	-2.2556	0.128823	0.956869	-0.217158	0.890006
Allr	P0ACN4	ALLR_ECOLI	HTH-type transcriptional repressor AllR	18.5916	17.8673	0.332194	0.530754	2.00345	0.129031	0.956869	0.724253	0.889306
Yfbr	P76491	5DNU_ECOLI	5'-deoxynucleotidase YfbR	20.0969	19.5975	0.286225	0.346554	1.92443	0.129161	0.956869	0.499394	0.88887
Ndh	P00393	DHNA_ECOLI	NADH dehydrogenase	23.6685	23.8373	0.123565	0.079341	-1.99157	0.129387	0.956869	-0.168847	0.88811
Gabt	P22256	GABT_ECOLI	4-aminobutyrate aminotransferase GabT	20.7587	21.2301	0.330042	0.267915	-1.92035	0.130223	0.956869	-0.47131	0.885314
Proc	P0A9L8	P5CR_ECOLI	Pyrroline-5-carboxylate reductase	21.8068	21.274	0.118123	0.387404	2.27832	0.130425	0.956869	0.532749	0.884639
Leub	P30125	LEU3_ECOLI	3-isopropylmalate dehydrogenase	23.7664	23.6627	0.0473917	0.0764444	1.99626	0.130467	0.956869	0.103663	0.884499
Dppf	P37313	DPPF_ECOLI	Dipeptide transport ATP-binding protein DppF	20.6643	20.2802	0.0888883	0.281272	2.2553	0.131567	0.956869	0.384097	0.880852
Alda	P25553	ALDA_ECOLI	Lactaldehyde dehydrogenase	22.978	23.029	0.0373212	0.0256314	-1.94992	0.132067	0.956869	-0.0509701	0.879207
Rpsu	P68679	RS21_ECOLI	30S ribosomal protein S21	23.7164	24.2222	0.331065	0.328651	-1.8781	0.133578	0.956869	-0.505828	0.874264
Ybdh	P45579	YBDH_ECOLI	Uncharacterized oxidoreductase YbdH	21.3453	20.8805	0.342163	0.101795	2.25502	0.133642	0.956869	0.464771	0.874055
Ybjd	P75828	YBJD_ECOLI	Uncharacterized protein YbjD	21.5064	21.3442	0.0967817	0.113819	1.88037	0.135068	0.956869	0.162198	0.869449
Glms	P17169	GLMS_ECOLI	Glutamine--fructose-6-phosphate aminotransferase [isomerizing]	24.6385	24.4336	0.0771583	0.155333	2.04588	0.135456	0.956869	0.204866	0.8682
Ppsr	P0A8A4	PSRP_ECOLI	Phosphoenolpyruvate synthase regulatory protein	20.6697	19.8448	0.165938	0.609597	2.26163	0.13567	0.956869	0.824947	0.867515
Cspa	P0A9X9	CSPA_ECOLI	Cold shock protein CspA	16.3542	20.6495	3.15754	0.705054	-2.29956	0.136682	0.956869	-4.29535	0.864288
Atpe	P68699	ATPL_ECOLI	ATP synthase subunit c	23.72	23.5279	0.102395	0.141783	1.90224	0.136921	0.956869	0.192076	0.863531
Kdpd	P21865	KDPD_ECOLI	Sensor protein KdpD	15.2671	20.8525	4.01973	0.260381	-2.40164	0.137256	0.956869	-5.5854	0.862467
Dacb	P24228	DACB_ECOLI	D-alanyl-D-alanine carboxypeptidase DacB	18.0209	15.8577	0.937117	1.65789	1.96743	0.139157	0.956869	2.16321	0.856496
Cyay	P27838	CYAY_ECOLI	Protein CyaY	20.2272	21.1519	0.708521	0.407401	-1.95965	0.139355	0.956869	-0.924697	0.855878
Metf	P0AEZ1	METF_ECOLI	5,10-methylenetetrahydrofolate reductase	24.0888	23.8431	0.0557652	0.187038	2.18065	0.141643	0.956869	0.245724	0.848804
Ybem	P39874	YBEM_ECOLI	Putative hydrolase YbeM	19.4498	20.0694	0.427413	0.402412	-1.828	0.141815	0.956869	-0.619562	0.848278
Cydd	P29018	CYDD_ECOLI	ATP-binding/permease protein CydD	19.9784	19.1592	0.390413	0.629507	1.91564	0.141852	0.956869	0.819261	0.848164
Rpmf	P0A7N4	RL32_ECOLI	50S ribosomal protein L32	22.0233	22.64	0.290076	0.475977	-1.91638	0.142622	0.956869	-0.616722	0.845812
Deor	P0ACK5	DEOR_ECOLI	Deoxyribose operon repressor	20.6952	20.2582	0.310299	0.276365	1.82122	0.143625	0.956869	0.436921	0.842768
Ygif	P30871	3PASE_ECOLI	Inorganic triphosphatase	22.1209	22.0233	0.0564786	0.0734027	1.82499	0.146738	0.956869	0.0975862	0.833458
Hemy	P0ACB7	HEMY_ECOLI	Protein HemY	21.7529	21.3938	0.123937	0.284149	2.0062	0.147324	0.956869	0.35907	0.831728
Exox	P0AEK0	EXOX_ECOLI	Exodeoxyribonuclease 10	18.7437	14.9011	1.12562	3.03973	2.05329	0.148738	0.956869	3.84262	0.827579
Mipa	P0A908	MIPA_ECOLI	MltA-interacting protein	18.4973	19.8544	1.08088	0.589628	-1.90908	0.149478	0.956869	-1.35709	0.825421
Muri	P22634	MURI_ECOLI	Glutamate racemase	18.7896	16.1719	0.202085	1.99591	2.26009	0.149734	0.956869	2.61771	0.824681
Cysa	P16676	CYSA_ECOLI	Sulfate/thiosulfate import ATP-binding protein CysA	21.8084	21.3433	0.298835	0.338089	1.78541	0.149823	0.956869	0.465129	0.824421
Hyfg	P77329	HYFG_ECOLI	Hydrogenase-4 component G	19.1703	18.9398	0.0889422	0.184426	1.94953	0.150071	0.956869	0.230462	0.823703
Yeez	P0AD12	YEEZ_ECOLI	Protein YeeZ	22.9519	22.5623	0.126451	0.310864	2.01063	0.1501	0.956869	0.389575	0.823619
Hybc	P0ACE0	MBHM_ECOLI	Hydrogenase-2 large chain	20.3491	20.8471	0.162957	0.399012	-2.00132	0.151166	0.956869	-0.498011	0.820545
Phna	P0AFJ1	PHNA_ECOLI	Protein PhnA	19.7205	20.3781	0.274903	0.529204	-1.90968	0.151987	0.956869	-0.657503	0.818193
Dape	P0AED7	DAPE_ECOLI	Succinyl-diaminopimelate desuccinylase	21.5394	20.9623	0.43154	0.361378	1.77591	0.152606	0.956869	0.577121	0.816428
Puta	P09546	PUTA_ECOLI	Bifunctional protein PutA	17.1705	14.1416	2.34815	0.0315968	2.23401	0.155022	0.956869	3.02893	0.809607
Yhbj	P0A894	YHBJ_ECOLI	UPF0042 nucleotide-binding protein YhbJ	21.958	21.6054	0.103862	0.285564	2.00966	0.155235	0.956869	0.352568	0.80901
Fldb	P0ABY4	FLAW_ECOLI	Flavodoxin-2	15.7313	19.1501	2.73907	0.726701	-2.08958	0.155963	0.956869	-3.41879	0.806977
Htpx	P23894	HTPX_ECOLI	Protease HtpX	19.3506	19.6338	0.188654	0.208034	-1.74691	0.156258	0.956869	-0.283244	0.806157
Fhue	P16869	FHUE_ECOLI	FhuE receptor	21.3869	22.475	0.836615	0.666433	-1.76197	0.156437	0.956869	-1.08809	0.80566
Sula	P0AFZ5	SULA_ECOLI	Cell division inhibitor SulA	16.0948	13.1416	2.30332	0.0315968	2.22058	0.156483	0.956869	2.95325	0.805533
Fsab	P32669	FSAB_ECOLI	Fructose-6-phosphate aldolase 2	14.8585	19.089	3.3121	0.279576	-2.2045	0.15652	0.956869	-4.23054	0.805429
Muts	P23909	MUTS_ECOLI	DNA mismatch repair protein MutS	18.6375	19.2713	0.204407	0.517849	-1.97182	0.156817	0.956869	-0.633799	0.804607
Sufb	P77522	SUFB_ECOLI	FeS cluster assembly protein SufB	17.888	15.1416	2.15002	0.0315968	2.2123	0.157387	0.956869	2.74646	0.80303
Gmhb	P63228	GMHBB_ECOLI	D-glycero-beta-D-manno-heptose-1,7-bisphosphate 7-phosphatase	19.7426	20.2754	0.362343	0.388801	-1.7365	0.157835	0.956869	-0.532834	0.801796
Deoa	P07650	TYPH_ECOLI	Thymidine phosphorylase	21.9985	21.5961	0.259998	0.304048	1.74216	0.158167	0.956869	0.40239	0.800884
Phea	P0A9J8	PHEA_ECOLI	P-protein	22.226	22.3533	0.0466265	0.104908	-1.92058	0.158477	0.956869	-0.1273	0.800034
Argr	P0A6D0	ARGR_ECOLI	Arginine repressor	15.1854	19.3869	3.36472	0.478845	-2.14123	0.160596	0.956869	-4.20151	0.794265
Astc	P77581	ASTC_ECOLI	Succinylornithine transaminase	23.594	24.0852	0.389774	0.0126345	-2.18124	0.160658	0.956869	-0.491116	0.794096
Fbp	P0A993	F16PA_ECOLI	Fructose-1,6-bisphosphatase class 1	22.208	21.8379	0.0946012	0.304728	2.00893	0.161455	0.956869	0.370081	0.791948
Efeu	P75901	EFEU_ECOLI	Putative inactive ferrous iron permease EfeU	20.3286	16.1046	0.293335	3.37761	2.15798	0.161711	0.956869	4.22403	0.791261
Nac	Q47005	NAC_ECOLI	Nitrogen assimilation regulatory protein nac	15.672	18.7096	2.47787	0.587742	-2.06598	0.161806	0.956869	-3.03758	0.791004
Yggs	P67080	YGGS_ECOLI	UPF0001 protein YggS	20.9011	21.4117	0.203408	0.425938	-1.87385	0.1619	0.956869	-0.510657	0.790753
Gapa	P0A9B2	G3P1_ECOLI	Glyceraldehyde-3-phosphate dehydrogenase A	27.5515	27.4041	0.101097	0.109679	1.7121	0.162515	0.956869	0.147446	0.789108
Cpxa	P0AE82	CPXA_ECOLI	Sensor protein CpxA	19.2369	18.2034	0.65606	0.808634	1.71904	0.163764	0.956869	1.03348	0.785783
Rnpa	P0A7Y8	RNPA_ECOLI	Ribonuclease P protein component	18.6409	14.9009	0.468055	3.03954	2.10634	0.163977	0.956869	3.73993	0.785218
Dppa	P23847	DPPA_ECOLI	Periplasmic dipeptide transport protein	25.2169	24.7238	0.28826	0.401377	1.72825	0.166271	0.956869	0.49308	0.779185
Glgb	P07762	GLGB_ECOLI	1,4-alpha-glucan branching enzyme GlgB	19.7052	20.3315	0.528313	0.196062	-1.92483	0.166321	0.956869	-0.626241	0.779052
Yich	P31433	YICH_ECOLI	Uncharacterized protein YicH	20.7003	20.5643	0.0266409	0.113004	2.02991	0.166623	0.956869	0.136067	0.778266
Glyq	P00960	SYGA_ECOLI	Glycine--tRNA ligase alpha subunit	23.1609	23.0071	0.0291296	0.128181	2.02712	0.167823	0.956869	0.153843	0.775148
Rpsn	P0AG59	RS14_ECOLI	30S ribosomal protein S14	23.0139	23.2465	0.0961627	0.197945	-1.83042	0.167953	0.956869	-0.232565	0.774813
Rsd	P0AFX4	RSD_ECOLI	Regulator of sigma D	18.285	17.1863	0.231066	0.921338	2.00349	0.168645	0.956869	1.09873	0.773028
Malz	P21517	MALZ_ECOLI	Maltodextrin glucosidase	19.5937	18.2741	0.179662	1.09567	2.05852	0.169228	0.956869	1.31957	0.771527
Lptg	P0ADC6	LPTG_ECOLI	Lipopolysaccharide export system permease protein LptG	19.4804	20.2261	0.449014	0.614618	-1.69686	0.171532	0.956869	-0.745697	0.765654
Yjgr	P39342	YJGR_ECOLI	Uncharacterized protein YjgR	20.8942	21.2005	0.220771	0.230106	-1.66343	0.171681	0.956869	-0.306253	0.765278
Mhpa	P77397	MHPA_ECOLI	3-(3-hydroxy-phenyl)propionate/3-hydroxycinnamic acid hydroxylase	22.5864	22.0859	0.141402	0.429179	1.9185	0.172083	0.956869	0.500516	0.764261
Aroh	P00887	AROH_ECOLI	Phospho-2-dehydro-3-deoxyheptonate aldolase, Trp-sensitive	22.7103	22.7788	0.0591669	0.0248281	-1.84945	0.172274	0.956869	-0.0685144	0.763781
Ilve	P0AB80	ILVE_ECOLI	Branched-chain-amino-acid aminotransferase	25.2249	24.9805	0.0165353	0.203573	2.07242	0.172333	0.956869	0.244379	0.763631
Kdgr	P76268	KDGR_ECOLI	Transcriptional regulator KdgR	22.7153	22.4097	0.0655364	0.26047	1.9709	0.173057	0.956869	0.305627	0.761811
Icd	P08200	IDH_ECOLI	Isocitrate dehydrogenase [NADP]	27.0981	26.928	0.0406132	0.145826	1.94703	0.173612	0.956869	0.170164	0.760419
Ydcp	P76104	YDCP_ECOLI	Uncharacterized protease YdcP	16.5035	18.5764	1.7833	0.512418	-1.93507	0.174382	0.956869	-2.07295	0.758499
Alr	P0A6B4	ALR1_ECOLI	Alanine racemase, biosynthetic	21.1774	21.5824	0.341194	0.0400596	-2.04204	0.17447	0.956869	-0.405022	0.758279
Pqql	P31828	PQQL_ECOLI	Probable zinc protease PqqL	16.6774	18.9757	1.94779	0.265147	-2.02507	0.17556	0.956869	-2.29831	0.755574
Fuma	P0AC33	FUMA_ECOLI	Fumarate hydratase class I, aerobic	23.6009	23.4429	0.0631629	0.138388	1.79878	0.176461	0.956869	0.157981	0.753351
Ynhg	P76193	YNHG_ECOLI	Probable L,D-transpeptidase YnhG	20.4805	20.9788	0.189804	0.437663	-1.80935	0.177242	0.956869	-0.498337	0.751433
Uvrd	P03018	UVRD_ECOLI	DNA helicase II	14.5249	17.7223	2.73453	0.191763	-2.02031	0.179525	0.956869	-3.19745	0.745875
Rihc	P22564	RIHC_ECOLI	Non-specific ribonucleoside hydrolase RihC	17.9285	19.8962	0.0883938	1.68445	-2.02049	0.180045	0.956869	-1.96767	0.744619
Cara	P0A6F1	CARA_ECOLI	Carbamoyl-phosphate synthase small chain	24.6196	24.5291	0.0618883	0.0734054	1.63161	0.180125	0.956869	0.0904452	0.744426
Dnac	P0AEF0	DNAC_ECOLI	DNA replication protein DnaC	13.1177	15.4024	0.308389	1.98059	-1.97424	0.181134	0.956869	-2.28473	0.742001
Yhco	P64616	YHCO_ECOLI	Uncharacterized protein YhcO	13.1177	15.405	0.308389	1.98423	-1.97297	0.181332	0.956869	-2.28736	0.741525
Aste	P76215	ASTE_ECOLI	Succinylglutamate desuccinylase	13.1177	15.463	0.308389	2.03703	-1.9717	0.1818	0.956869	-2.34529	0.740406
Ybam	P45807	YBAM_ECOLI	Uncharacterized protein YbaM	13.1177	15.6925	0.308389	2.2348	-1.97688	0.181993	0.956869	-2.57487	0.739946
Baes	P30847	BAES_ECOLI	Signal transduction histidine-protein kinase BaeS	14.1177	16.8196	0.308389	2.34371	-1.97974	0.182009	0.956869	-2.70196	0.739908
Maea	P26616	MAO1_ECOLI	NAD-dependent malic enzyme	22.4413	22.6886	0.11641	0.219699	-1.723	0.182128	0.956869	-0.247335	0.739622
Mntr	P0A9F1	MNTR_ECOLI	Transcriptional regulator MntR	13.1177	16.0666	0.308389	2.55695	-1.98324	0.18219	0.956869	-2.94898	0.739475
Glpe	P0A6V5	GLPE_ECOLI	Thiosulfate sulfurtransferase GlpE	13.1177	16.081	0.308389	2.57213	-1.98127	0.182505	0.956869	-2.96329	0.738726
Frvr	P32152	FRVR_ECOLI	Putative frv operon regulatory protein	14.1177	17.7329	0.308389	3.13374	-1.98859	0.182638	0.956869	-3.61527	0.738408
Yffb	P24178	YFFB_ECOLI	Protein YffB	13.1177	17.0286	0.308389	3.39027	-1.98985	0.182814	0.956869	-3.91096	0.737992
Yihs	P32140	YIHS_ECOLI	Uncharacterized sugar isomerase YihS	13.1177	16.6601	0.308389	3.07302	-1.98662	0.182815	0.956869	-3.54239	0.737989
Bgla	Q46829	BGLA_ECOLI	6-phospho-beta-glucosidase BglA	22.608	22.3976	0.0289629	0.18381	1.95876	0.183178	0.956869	0.210433	0.737127
Metb	P00935	METB_ECOLI	Cystathionine gamma-synthase	22.6759	22.4379	0.00814369	0.206303	1.99644	0.183592	0.956869	0.23798	0.736146
Ybel	P0AAT9	YBEL_ECOLI	Uncharacterized protein YbeL	18.9893	19.6996	0.364608	0.63045	-1.68925	0.183933	0.956869	-0.710295	0.73534
Cdsa	P0ABG1	CDSA_ECOLI	Phosphatidate cytidylyltransferase	20.1933	16.7884	0.124444	2.95605	1.9933	0.183968	0.956869	3.40493	0.735257
Moba	P32173	MOBA_ECOLI	Molybdenum cofactor guanylyltransferase	19.5334	15.9585	0.416852	3.12461	1.96425	0.184061	0.956869	3.5749	0.735037
Folx	P0AC19	FOLX_ECOLI	D-erythro-7,8-dihydroneopterin triphosphate epimerase	22.1097	21.4558	0.151747	0.580811	1.88691	0.184379	0.956869	0.653979	0.734289
Fre	P0AEN1	FRE_ECOLI	NAD(P)H-flavin reductase	22.2651	21.8913	0.0619331	0.329984	1.92831	0.185187	0.956869	0.37379	0.732389
Yidb	P09996	YIDB_ECOLI	Uncharacterized protein YidB	14.7026	17.0735	0.308389	2.08695	-1.94657	0.185621	0.956869	-2.3709	0.731374
Metj	P0A8U6	METJ_ECOLI	Met repressor	20.1076	20.6748	0.275876	0.508807	-1.69748	0.185726	0.956869	-0.567234	0.731126
Enta	P15047	ENTA_ECOLI	2,3-dihydro-2,3-dihydroxybenzoate dehydrogenase	22.666	22.1331	0.209778	0.482304	1.75486	0.186523	0.956869	0.532877	0.729267
Yaia	P0AAN5	YAIA_ECOLI	Uncharacterized protein YaiA	13.1177	17.9432	0.308389	4.23883	-1.96657	0.186794	0.956869	-4.82549	0.728637
Yodb	P76345	C56H_ECOLI	Cytochrome b561 homolog 1	21.5561	21.4158	0.0339098	0.125886	1.86408	0.187068	0.956869	0.140312	0.728001
Malf	P02916	MALF_ECOLI	Maltose transport system permease protein MalF	22.2651	22.4823	0.0998136	0.196315	-1.70806	0.187105	0.956869	-0.217182	0.727914
Rara	P0AAZ4	RARA_ECOLI	Replication-associated recombination protein A	19.0436	18.7028	0.171803	0.306347	1.68027	0.187284	0.956869	0.340733	0.727499
Prmc	P0ACC1	PRMC_ECOLI	Release factor glutamine methyltransferase	13.1177	16.7739	0.308389	3.22366	-1.95555	0.187396	0.956869	-3.65624	0.72724
Dppd	P0AAG0	DPPD_ECOLI	Dipeptide transport ATP-binding protein DppD	20.6776	19.4439	0.371771	1.12315	1.80608	0.18965	0.956869	1.23365	0.722047
Rdoa	P0C0K3	RDOA_ECOLI	Protein RdoA	18.728	15.6999	0.173448	2.69134	1.94474	0.190186	0.956869	3.0281	0.720822
Lysa	P00861	DCDA_ECOLI	Diaminopimelate decarboxylase	23.1252	22.8692	0.0138515	0.227644	1.94461	0.190318	0.956869	0.256053	0.720521
Yihi	P0A8H6	YIHI_ECOLI	Der GTPase-activating protein YihI	17.0829	19.0341	1.76723	0.449986	-1.8532	0.190329	0.956869	-1.95118	0.720495
Minc	P18196	MINC_ECOLI	Septum site-determining protein MinC	19.4076	18.5216	0.21216	0.804743	1.84384	0.190888	0.956869	0.885953	0.719222
Cra	P0ACP1	CRA_ECOLI	Catabolite repressor/activator	21.7193	21.8627	0.125863	0.0897256	-1.60665	0.190889	0.956869	-0.14338	0.71922
Kate	P21179	CATE_ECOLI	Catalase HPII	18.8154	18.2818	0.123252	0.485584	1.84476	0.191759	0.956869	0.533582	0.717244
Yehs	P33355	YEHS_ECOLI	Uncharacterized protein YehS	19.2915	19.8365	0.228032	0.50188	-1.71244	0.192099	0.956869	-0.545012	0.716475
Ybdz	P18393	YBDZ_ECOLI	Uncharacterized protein YbdZ	18.2	14.8739	0.20448	2.99266	1.92059	0.193575	0.956869	3.32616	0.713151
Ispb	P0AD57	ISPB_ECOLI	Octaprenyl-diphosphate synthase	20.1421	20.9023	0.6893	0.0931175	-1.89293	0.194398	0.956869	-0.760167	0.711307
Ubix	P0AG03	UBIX_ECOLI	3-octaprenyl-4-hydroxybenzoate carboxy-lyase partner protein	20.3546	18.3734	0.335334	1.81018	1.86396	0.195145	0.956869	1.98119	0.709643
Puru	P37051	PURU_ECOLI	Formyltetrahydrofolate deformylase	22.3918	22.5875	0.0950987	0.181078	-1.65735	0.195268	0.956869	-0.19571	0.70937
Rpmb	P0A7M2	RL28_ECOLI	50S ribosomal protein L28	23.4144	23.5493	0.112315	0.0993681	-1.5571	0.195482	0.956869	-0.134815	0.708893
Hisc	P06986	HIS8_ECOLI	Histidinol-phosphate aminotransferase	23.0502	23.3238	0.181652	0.240653	-1.57198	0.196323	0.956869	-0.27365	0.707029
Shia	P76350	SHIA_ECOLI	Shikimate transporter	16.4097	14.1416	2.06109	0.0315968	1.90579	0.196891	0.956869	2.2681	0.705774
Rpma	P0A7L8	RL27_ECOLI	50S ribosomal protein L27	21.8697	22.1079	0.0903299	0.222867	-1.71589	0.197006	0.956869	-0.238234	0.70552
Holb	P28631	HOLB_ECOLI	DNA polymerase III subunit delta'	18.7255	17.9704	0.676957	0.475437	1.58119	0.197059	0.956869	0.755178	0.705405
Pdxk	P40191	PDXK_ECOLI	Pyridoxine kinase	19.1819	19.5207	0.31565	0.179757	-1.61546	0.199657	0.956869	-0.338794	0.699715
Heml	P23893	GSA_ECOLI	Glutamate-1-semialdehyde 2,1-aminomutase	24.1128	23.8496	0.060738	0.245784	1.80057	0.199692	0.956869	0.263194	0.699638
Glts	P0AER8	GLTS_ECOLI	Sodium/glutamate symport carrier protein	20.4217	19.7278	0.320646	0.654439	1.64921	0.20053	0.956869	0.693915	0.697821
Acef	P06959	ODP2_ECOLI	Dihydrolipoyllysine-residue acetyltransferase component of pyruvate dehydrogenase complex	25.6786	25.419	0.0371616	0.242163	1.83524	0.202177	0.956869	0.259594	0.694268
Yqjh	Q46871	YQJH_ECOLI	NADPH-dependent ferric-chelate reductase	21.4282	20.9925	0.0913224	0.410492	1.7947	0.203092	0.956869	0.435738	0.692308
Atpd	P0ABB4	ATPB_ECOLI	ATP synthase subunit beta	26.8664	26.6598	0.0905125	0.19714	1.64984	0.203725	0.956869	0.20663	0.690955
Grxb	P0AC59	GLRX2_ECOLI	Glutaredoxin-2	22.596	21.7862	0.304926	0.776479	1.68131	0.205009	0.956869	0.809768	0.688227
Hemb	P0ACB2	HEM2_ECOLI	Delta-aminolevulinic acid dehydratase	22.7381	22.4541	0.14999	0.269519	1.59517	0.205181	0.956869	0.284067	0.687864
Hsca	P0A6Z1	HSCA_ECOLI	Chaperone protein HscA	20.5341	20.0641	0.140103	0.450115	1.72683	0.205751	0.956869	0.469994	0.686658
Wecb	P27828	WECB_ECOLI	UDP-N-acetylglucosamine 2-epimerase	21.4469	21.2569	0.0729936	0.182655	1.67289	0.205851	0.956869	0.189981	0.686447
Plig	P76002	PLIG_ECOLI	Inhibitor of g-type lysozyme	23.742	23.4032	0.0233594	0.31839	1.83815	0.206079	0.956869	0.338803	0.685966
Ddla	P0A6J8	DDLA_ECOLI	D-alanine--D-alanine ligase A	20.6684	20.2449	0.196806	0.406391	1.62457	0.206173	0.956869	0.423519	0.685768
Ybak	P0AAR3	YBAK_ECOLI	Cys-tRNA(Pro)/Cys-tRNA(Cys) deacylase YbaK	22.3598	22.1093	0.212294	0.193899	1.50943	0.206264	0.956869	0.250562	0.685576
Seld	P16456	SELD_ECOLI	Selenide, water dikinase	22.0575	21.906	0.142426	0.00683756	1.84018	0.206523	0.956869	0.151491	0.685031
Wecg	P27836	WECG_ECOLI	UDP-N-acetyl-D-mannosaminuronic acid transferase	17.5069	15.816	0.500985	1.62586	1.72147	0.207079	0.956869	1.69091	0.683864
Sad	P76149	SAD_ECOLI	Succinate semialdehyde dehydrogenase [NAD(P)+] Sad	19.4103	19.0617	0.331201	0.0520606	1.8013	0.20748	0.956869	0.348673	0.683024
Mlta	P0A935	MLTA_ECOLI	Membrane-bound lytic murein transglycosylase A	16.4231	13.1416	3.09812	0.0315968	1.83452	0.207985	0.956869	3.28158	0.681967
Pspb	P0AFM9	PSPB_ECOLI	Phage shock protein B	20.7671	20.2167	0.156905	0.530755	1.72227	0.208311	0.956869	0.550337	0.681287
Glgx	P15067	GLGX_ECOLI	Glycogen debranching enzyme	15.5551	20.3194	4.5184	0.195839	-1.82459	0.209144	0.956869	-4.76428	0.679554
Kdsa	P0A715	KDSA_ECOLI	2-dehydro-3-deoxyphosphooctonate aldolase	23.509	23.2193	0.095612	0.281022	1.69036	0.209285	0.956869	0.289697	0.679262
Ftsp	P26648	FTSP_ECOLI	Cell division protein FtsP	17.4336	16.8655	0.116896	0.545795	1.76307	0.209292	0.956869	0.56817	0.679248
Yccj	P0AB14	YCCJ_ECOLI	Uncharacterized protein YccJ	17.0183	14.1416	2.737	0.0315968	1.82033	0.210278	0.956869	2.8767	0.677206
Pepb	P37095	PEPB_ECOLI	Peptidase B	24.5	24.2689	0.131911	0.221007	1.55524	0.210446	0.956869	0.231107	0.67686
Zapa	P0ADS2	ZAPA_ECOLI	Cell division protein ZapA	20.3715	20.0094	0.0949659	0.352549	1.71762	0.211979	0.956869	0.362073	0.673708
Spot	P0AG24	SPOT_ECOLI	Bifunctional (p)ppGpp synthase/hydrolase SpoT	20.8226	21.1713	0.337129	0.190376	-1.56007	0.212163	0.956869	-0.348725	0.67333
Pnca	P21369	PNCA_ECOLI	Pyrazinamidase/nicotinamidase	19.0444	16.8692	1.61001	1.95206	1.489	0.213224	0.956869	2.17527	0.671164
Dapf	P0A6K1	DAPF_ECOLI	Diaminopimelate epimerase	21.2024	20.7609	0.140195	0.43342	1.67902	0.213349	0.956869	0.441584	0.67091
Hemh	P23871	HEMH_ECOLI	Ferrochelatase	13.1177	14.5595	0.308389	1.40418	-1.73707	0.213388	0.956869	-1.44181	0.670829
Yhii	P37626	YHII_ECOLI	Uncharacterized protein YhiI	19.4007	19.8536	0.445549	0.169157	-1.64611	0.213433	0.956869	-0.452931	0.670738
Prma	P0A8T1	PRMA_ECOLI	Ribosomal protein L11 methyltransferase	19.8782	19.1882	0.124296	0.670412	1.7528	0.213604	0.956869	0.690007	0.67039
Dnan	P0A988	DPO3B_ECOLI	DNA polymerase III subunit beta	21.6711	21.43	0.0586881	0.235587	1.71972	0.213675	0.956869	0.241058	0.670247
Ompf	P02931	OMPF_ECOLI	Outer membrane protein F	25.5086	26.436	0.909424	0.260474	-1.69806	0.213803	0.956869	-0.927428	0.669986
Cyca	P0AAE0	CYCA_ECOLI	D-serine/D-alanine/glycine transporter	20.0676	19.6014	0.140624	0.457856	1.68594	0.213839	0.956869	0.466214	0.669912
Taud	P37610	TAUD_ECOLI	Alpha-ketoglutarate-dependent taurine dioxygenase	23.577	23.9065	0.0752899	0.322273	-1.72449	0.214331	0.956869	-0.329507	0.668915
Fusa	P0A6M8	EFG_ECOLI	Elongation factor G	27.2539	27.3987	0.0493494	0.14273	-1.6608	0.214379	0.956869	-0.144808	0.668817
Gyra	P0AES4	GYRA_ECOLI	DNA gyrase subunit A	24.2804	24.1256	0.0889146	0.149839	1.53877	0.214508	0.956869	0.154792	0.668556
Ygib	P0ADT2	YGIB_ECOLI	UPF0441 protein YgiB	17.3525	17.8154	0.215472	0.456108	-1.58936	0.214889	0.956869	-0.462885	0.667785
Rlmi	P75876	RLMI_ECOLI	Ribosomal RNA large subunit methyltransferase I	21.1429	21.2211	0.0765395	0.0415872	-1.5551	0.215267	0.956869	-0.0782085	0.667022
Rpmh	P0A7P5	RL34_ECOLI	50S ribosomal protein L34	20.5599	20.9738	0.409694	0.147309	-1.64654	0.21564	0.956869	-0.413878	0.66627
Yiid	P0ADQ2	YIID_ECOLI	Uncharacterized protein YiiD	19.9654	18.9058	0.0906565	1.03487	1.76669	0.217415	0.962179	1.05961	0.66271
Mine	P0A734	MINE_ECOLI	Cell division topological specificity factor	22.402	22.0232	0.133487	0.37801	1.63686	0.218319	0.963616	0.378854	0.660908
Aroa	P0A6D3	AROA_ECOLI	3-phosphoshikimate 1-carboxyvinyltransferase	24.5349	24.3639	0.0467727	0.170388	1.67627	0.219214	0.964176	0.171001	0.659132
Rpme	P0A7M9	RL31_ECOLI	50S ribosomal protein L31	20.5892	21.1522	0.125463	0.560155	-1.69866	0.220015	0.964176	-0.562968	0.657547
Ppsa	P23538	PPSA_ECOLI	Phosphoenolpyruvate synthase	24.2698	23.956	0.189056	0.308009	1.5042	0.221005	0.964176	0.313859	0.655597
Proa	P07004	PROA_ECOLI	Gamma-glutamyl phosphate reductase	23.6022	23.1522	0.0516223	0.445814	1.73671	0.221294	0.964176	0.450001	0.65503
Trer	P36673	TRER_ECOLI	HTH-type transcriptional regulator TreR	18.5646	18.3914	0.171678	0.0986734	1.51538	0.221591	0.964176	0.173244	0.654447
Yaii	P0A8D3	YAII_ECOLI	UPF0178 protein YaiI	16.7557	18.1208	1.22406	1.09076	-1.4422	0.223606	0.964176	-1.36517	0.650516
Coabc	P0ABQ0	COABC_ECOLI	Coenzyme A biosynthesis bifunctional protein CoaBC	20.6119	20.7427	0.0430127	0.132975	-1.62203	0.224672	0.964176	-0.130881	0.648452
Ycac	P21367	YCAC_ECOLI	Uncharacterized protein YcaC	18.9922	17.755	0.71707	1.23524	1.50036	0.224685	0.964176	1.23723	0.648426
Rnk	P0AFW4	RNK_ECOLI	Regulator of nucleoside diphosphate kinase	14.7724	18.5266	1.43245	3.82327	-1.59264	0.225052	0.964176	-3.75417	0.647716
Ampe	P0AE14	AMPE_ECOLI	Protein AmpE	20.5094	20.7433	0.236107	0.0389792	-1.69277	0.22611	0.964176	-0.233875	0.645679
Ycim	P0AB58	LPSRP_ECOLI	Lipopolysaccharide regulatory protein	17.7966	15.8611	0.0351022	1.94281	1.72527	0.22654	0.964176	1.93551	0.644855
Arob	P07639	AROB_ECOLI	3-dehydroquinate synthase	21.63	21.9615	0.265711	0.300811	-1.43061	0.226818	0.964176	-0.331508	0.644322
Thya	P0A884	TYSY_ECOLI	Thymidylate synthase	21.1496	20.5557	0.0764273	0.599979	1.7008	0.227158	0.964176	0.593916	0.643671
Rpls	P0A7K6	RL19_ECOLI	50S ribosomal protein L19	24.7467	24.8478	0.0181335	0.102496	-1.68141	0.227344	0.964176	-0.101044	0.643317
Ppa	P0A7A9	IPYR_ECOLI	Inorganic pyrophosphatase	22.0357	22.698	0.663723	0.398627	-1.48159	0.227585	0.964176	-0.662273	0.642857
Nikr	P0A6Z6	NIKR_ECOLI	Nickel-responsive regulator	19.3119	19.0325	0.225847	0.253117	1.42662	0.227724	0.964176	0.279407	0.642592
Proq	P45577	PROQ_ECOLI	ProP effector	22.857	22.5699	0.0188439	0.29223	1.69782	0.23061	0.964176	0.28705	0.637122
Mrp	P0AF08	MRP_ECOLI	Protein mrp	19.8221	20.4158	0.613174	0.281961	-1.5235	0.230979	0.964176	-0.593635	0.636427
Mnth	P0A769	MNTH_ECOLI	Divalent metal cation transporter MntH	16.5955	14.7265	1.90503	0.0315968	1.69908	0.231336	0.964176	1.86902	0.635757
Rnc	P0A7Y0	RNC_ECOLI	Ribonuclease 3	19.7131	20.3742	0.16549	0.682283	-1.63106	0.231356	0.964176	-0.661129	0.63572
Ycjf	P0A8R7	YCJF_ECOLI	UPF0283 membrane protein YcjF	16.045	17.8229	1.82866	0.350125	-1.65388	0.231469	0.964176	-1.77785	0.635508
Ente	P10378	ENTE_ECOLI	Enterobactin synthase component E	22.7377	22.4684	0.179608	0.268332	1.44426	0.231998	0.964176	0.269244	0.634516
Glda	P0A9S5	GLDA_ECOLI	Glycerol dehydrogenase	19.2467	19.9522	0.707511	0.458211	-1.44979	0.232037	0.964176	-0.705564	0.634443
Yfex	P76536	YFEX_ECOLI	Probable deferrochelatase/peroxidase YfeX	20.7263	21.2456	0.529198	0.308425	-1.46838	0.232353	0.964176	-0.519275	0.633852
Yafv	Q47679	YAFV_ECOLI	Hydrolase YafV	19.5895	18.0657	1.09548	1.50451	1.41822	0.235463	0.974526	1.52387	0.628077
Folm	P0AFS3	FOLM_ECOLI	Dihydrofolate reductase FolM	14.3134	15.3696	0.640763	1.0864	-1.45043	0.236312	0.974526	-1.05621	0.626515
Rplt	P0A7L3	RL20_ECOLI	50S ribosomal protein L20	24.4251	24.5614	0.108879	0.129429	-1.39622	0.237119	0.974526	-0.136341	0.625034
Rlmm	P0ADR6	RLMM_ECOLI	Ribosomal RNA large subunit methyltransferase M	20.3718	20.677	0.036718	0.318003	-1.65127	0.237264	0.974526	-0.305187	0.624768
Uspa	P0AED0	USPA_ECOLI	Universal stress protein A	23.9152	23.5568	0.297452	0.333575	1.38868	0.238127	0.974526	0.358332	0.623191
Aas	P31119	AAS_ECOLI	Bifunctional protein Aas	20.4209	19.7288	0.629581	0.59329	1.38558	0.238361	0.974526	0.692035	0.622766
Yqjd	P64581	YQJD_ECOLI	Uncharacterized protein YqjD	20.3133	19.1307	0.134746	1.24033	1.64171	0.239502	0.97588	1.18256	0.620692
Rplv	P61175	RL22_ECOLI	50S ribosomal protein L22	25.0965	25.2366	0.0901608	0.144359	-1.42621	0.239865	0.97588	-0.140147	0.620034
Cusa	P38054	CUSA_ECOLI	Cation efflux system protein CusA	20.639	21.4721	0.828549	0.617652	-1.39629	0.240588	0.976283	-0.833103	0.618726
Leua	P09151	LEU1_ECOLI	2-isopropylmalate synthase	23.7226	23.5685	0.164442	0.0565659	1.53498	0.241137	0.976283	0.154113	0.617736
Mlad	P64604	MLAD_ECOLI	Probable phospholipid ABC transporter-binding protein MlaD	20.9689	21.9224	1.02022	0.323544	-1.54306	0.242267	0.978476	-0.953511	0.615706
Miab	P0AEI1	MIAB_ECOLI	(Dimethylallyl)adenosine tRNA methylthiotransferase MiaB	21.3734	21.6108	0.231461	0.189836	-1.37353	0.244092	0.98138	-0.237389	0.612447
Ycik	P31808	YCIK_ECOLI	Uncharacterized oxidoreductase YciK	22.6289	22.4035	0.0384948	0.240532	1.6028	0.244166	0.98138	0.225416	0.612316
Ygiw	P0ADU5	YGIW_ECOLI	Protein YgiW	19.4946	20.8709	1.24969	1.22671	-1.36125	0.245094	0.981497	-1.37627	0.610667
Sfsa	P0A823	SFSA_ECOLI	Sugar fermentation stimulation protein A	14.8958	17.5781	2.86422	0.304334	-1.61297	0.245374	0.981497	-2.68232	0.610171
Sbcb	P04995	EX1_ECOLI	Exodeoxyribonuclease I	18.2907	19.2135	0.995893	0.227762	-1.56447	0.246564	0.982699	-0.922764	0.60807
Deda	P0ABP6	DEDA_ECOLI	Protein DedA	14.2387	15.9931	1.89332	0.402784	-1.56984	0.246856	0.982699	-1.75441	0.607557
Cysm	P16703	CYSM_ECOLI	Cysteine synthase B	20.67	21.1969	0.542122	0.379494	-1.37931	0.247667	0.983574	-0.526981	0.606132
Tsx	P0A927	TSX_ECOLI	Nucleoside-specific channel-forming protein tsx	22.651	22.3608	0.127725	0.316815	1.47122	0.249593	0.986851	0.290152	0.602767
Sohb	P0AG14	SOHB_ECOLI	Probable protease SohB	22.7341	22.3408	0.427641	0.20744	1.43344	0.250398	0.986851	0.393356	0.601369
Gss	P0AES0	GSP_ECOLI	Bifunctional glutathionylspermidine synthetase/amidase	22.1256	21.9043	0.152207	0.2326	1.37913	0.250543	0.986851	0.221335	0.601117
Yqca	P65367	YQCA_ECOLI	Uncharacterized protein YqcA	18.7399	19.4407	0.531091	0.718518	-1.35864	0.251507	0.986851	-0.700862	0.59945
Sucd	P0AGE9	SUCD_ECOLI	Succinyl-CoA ligase [ADP-forming] subunit alpha	25.4559	25.1379	0.0644317	0.348506	1.5543	0.252554	0.986851	0.318042	0.597646
Moab	P0AEZ9	MOAB_ECOLI	Molybdenum cofactor biosynthesis protein B	21.624	20.9615	0.374848	0.721083	1.41191	0.252617	0.986851	0.662479	0.597537
Mhpe	P51020	HOA_ECOLI	4-hydroxy-2-oxovalerate aldolase	23.1575	23.4692	0.306055	0.261555	-1.34087	0.252643	0.986851	-0.311667	0.597492
Nupx;psut	P33021;P33024	NUPX_ECOLI;PSUT_ECOLI	Nucleoside permease NupX	20.2767	20.599	0.255383	0.326963	-1.34568	0.253477	0.987789	-0.322333	0.596061
Acui	P26646	ACUI_ECOLI	Probable acrylyl-CoA reductase AcuI	22.7694	22.4461	0.118533	0.361266	1.47239	0.257502	0.991444	0.323216	0.589219
Eptc	P0CB39	EPTC_ECOLI	Phosphoethanolamine transferase EptC	23.9937	24.1388	0.121648	0.146265	-1.32155	0.259003	0.991444	-0.145153	0.586695
Sers	P0A8L1	SYS_ECOLI	Serine--tRNA ligase	24.7303	24.6122	0.0410297	0.133031	1.46901	0.260417	0.991444	0.118072	0.584331
Rsme	P0AGL7	RSME_ECOLI	Ribosomal RNA small subunit methyltransferase E	20.6106	21.1072	0.195951	0.559696	-1.45049	0.260495	0.991444	-0.496607	0.584201
Yafj	Q47147	YAFJ_ECOLI	Putative glutamine amidotransferase YafJ	17.5584	16.0604	0.370473	1.68667	1.50249	0.261228	0.991444	1.498	0.58298
Glya	P0A825	GLYA_ECOLI	Serine hydroxymethyltransferase	26.393	26.1558	0.156585	0.260175	1.353	0.26175	0.991444	0.237205	0.582114
Elbb	P0ABU5	ELBB_ECOLI	Enhancing lycopene biosynthesis protein 2	21.7864	21.2038	0.312021	0.656252	1.38851	0.263248	0.991444	0.582525	0.579636
Cysi	P17846	CYSI_ECOLI	Sulfite reductase [NADPH] hemoprotein beta-component	25.0187	25.1415	0.0899371	0.132437	-1.32808	0.263685	0.991444	-0.12275	0.578915
Pita	P0AFJ7	PITA_ECOLI	Low-affinity inorganic phosphate transporter 1	19.9727	19.6106	0.273675	0.387547	1.32204	0.263941	0.991444	0.362129	0.578493
Gsta	P0A9D2	GSTA_ECOLI	Glutathione S-transferase GstA	22.2662	21.606	0.433703	0.731712	1.34454	0.264898	0.991444	0.660289	0.576921
Pepq	P21165	PEPQ_ECOLI	Xaa-Pro dipeptidase	23.6221	23.5043	0.131094	0.0758724	1.34705	0.265303	0.991444	0.117799	0.576258
Talb	P0A870	TALB_ECOLI	Transaldolase B	25.1812	25.0022	0.112465	0.200476	1.34924	0.266168	0.991444	0.179063	0.574844
Yecm	P52007	YECM_ECOLI	Protein YecM	21.0743	19.797	1.46209	0.586997	1.4042	0.266785	0.991444	1.2773	0.573839
Puuc	P23883	PUUC_ECOLI	Aldehyde dehydrogenase PuuC	20.4733	18.4477	0.896002	2.32775	1.40662	0.267924	0.991444	2.02561	0.571988
Mhpc	P77044	MHPC_ECOLI	2-hydroxy-6-oxononadienedioate/2-hydroxy-6-oxononatrienedioate hydrolase	25.2306	25.427	0.0993416	0.22483	-1.3836	0.268021	0.991444	-0.19635	0.57183
Rfaf	P37692	RFAF_ECOLI	ADP-heptose--LPS heptosyltransferase 2	18.0507	18.2994	0.228297	0.245348	-1.28523	0.268412	0.991444	-0.248679	0.571198
Yjia	P24203	YJIA_ECOLI	Uncharacterized GTP-binding protein YjiA	21.4999	21.7362	0.259122	0.177001	-1.30418	0.270646	0.991444	-0.236285	0.567598
Frdb	P0AC47	FRDB_ECOLI	Fumarate reductase iron-sulfur subunit	20.1818	18.2014	0.419172	2.28778	1.47478	0.270735	0.991444	1.9804	0.567456
Ygfz	P0ADE8	YGFZ_ECOLI	tRNA-modifying protein YgfZ	23.2066	23.0659	0.0557598	0.16325	1.41309	0.270887	0.991444	0.140742	0.567212
Dnaa	P03004	DNAA_ECOLI	Chromosomal replication initiator protein DnaA	21.2972	21.1119	0.0583312	0.215153	1.43952	0.271461	0.991444	0.185271	0.566292
Arnb	P77690	ARNB_ECOLI	UDP-4-amino-4-deoxy-L-arabinose--oxoglutarate aminotransferase	23.2592	23.6435	0.384455	0.353068	-1.27518	0.271736	0.991444	-0.384295	0.565852
Yigp	P0ADP7	YIGP_ECOLI	Uncharacterized protein YigP	15.5944	18.0476	2.85486	0.927537	-1.41556	0.272014	0.991444	-2.45326	0.565409
Ilvh	P00894	ILVH_ECOLI	Acetolactate synthase isozyme 3 small subunit	21.9534	21.7516	0.0451664	0.234255	1.4644	0.272456	0.991444	0.201703	0.564704
Pdxy	P77150	PDXY_ECOLI	Pyridoxamine kinase	17.7917	18.5316	0.695837	0.72927	-1.27146	0.272606	0.991444	-0.739938	0.564465
Folc	P08192	FOLC_ECOLI	Bifunctional protein FolC	22.0016	21.5763	0.195412	0.495861	1.38213	0.273453	0.991444	0.425301	0.563117
Cusb	P77239	CUSB_ECOLI	Cation efflux system protein CusB	21.1292	21.7107	0.153632	0.678772	-1.4472	0.273783	0.991444	-0.581487	0.562593
Potg	P31134	POTG_ECOLI	Putrescine transport ATP-binding protein PotG	20.5618	21.0786	0.606577	0.188716	-1.40903	0.275135	0.991444	-0.516783	0.560454
Lamb	P02943	LAMB_ECOLI	Maltoporin	22.4074	23.6773	1.4857	0.263327	-1.45776	0.275257	0.991444	-1.26991	0.560262
Mreb	P0A9X4	MREB_ECOLI	Rod shape-determining protein MreB	23.7605	23.8256	0.0732902	0.0469542	-1.29692	0.275548	0.991444	-0.0651745	0.559802
Oppd	P76027	OPPD_ECOLI	Oligopeptide transport ATP-binding protein OppD	19.2174	18.8788	0.287901	0.360989	1.26989	0.276113	0.991444	0.338533	0.558913
Nfua	P63020	NFUA_ECOLI	Fe/S biogenesis protein NfuA	21.2176	21.7177	0.471181	0.500822	-1.25963	0.276526	0.991444	-0.500076	0.558264
Mtfa	P76346	MTFA_ECOLI	Protein MtfA	19.2952	16.6528	0.455099	3.10121	1.46017	0.276799	0.991444	2.64242	0.557836
Entf	P11454	ENTF_ECOLI	Enterobactin synthase component F	24.1724	24.0179	0.069009	0.183006	1.36763	0.279191	0.991444	0.154434	0.554098
Xtha	P09030	EX3_ECOLI	Exodeoxyribonuclease III	21.7056	21.4009	0.268884	0.322862	1.25587	0.279583	0.991444	0.304652	0.553489
Tgt	P0A847	TGT_ECOLI	Queuine tRNA-ribosyltransferase	22.0486	22.4343	0.34522	0.407393	-1.25081	0.280871	0.991444	-0.385624	0.551494
Arnt	P76473	ARNT_ECOLI	Undecaprenyl phosphate-alpha-4-amino-4-deoxy-L-arabinose arabinosyl transferase	20.8994	21.0191	0.116802	0.11846	-1.24558	0.28091	0.991444	-0.119635	0.551433
Lipa	P60716	LIPA_ECOLI	Lipoyl synthase	18.8655	16.5983	0.721196	2.70366	1.40337	0.28105	0.991444	2.26721	0.551216
Cpxr	P0AE88	CPXR_ECOLI	Transcriptional regulatory protein CpxR	22.1103	21.7228	0.190622	0.460673	1.34625	0.281258	0.991444	0.387506	0.550895
Secg	P0AG99	SECG_ECOLI	Protein-export membrane protein SecG	18.6944	18.4594	0.0825383	0.281622	1.3872	0.282677	0.991444	0.235038	0.548709
Ynce	P76116	YNCE_ECOLI	Uncharacterized protein YncE	24.7526	24.3653	0.256083	0.452449	1.29022	0.283225	0.991444	0.387274	0.547869
Mscs	P0C0S1	MSCS_ECOLI	Small-conductance mechanosensitive channel	22.4068	21.7557	0.362273	0.774218	1.31933	0.283469	0.991444	0.651103	0.547495
Rodz	P27434	RODZ_ECOLI	Cytoskeleton protein RodZ	23.1951	22.6794	0.0622171	0.61607	1.44255	0.283573	0.991444	0.515708	0.547335
Ydih	P64476	YDIH_ECOLI	Uncharacterized protein YdiH	19.2061	17.8143	0.1389	1.66473	1.44306	0.284184	0.991444	1.39179	0.546401
Bcsb	P37652	BCSB_ECOLI	Cyclic di-GMP-binding protein	21.5351	21.302	0.249376	0.208947	1.24144	0.28419	0.991444	0.233187	0.546391
Guab	P0ADG7	IMDH_ECOLI	Inosine-5'-monophosphate dehydrogenase	24.0348	23.8509	0.162254	0.198494	1.24282	0.284292	0.991444	0.183957	0.546235
Rpsr	P0A7T7	RS18_ECOLI	30S ribosomal protein S18	23.4655	23.6142	0.128726	0.162521	-1.24196	0.285378	0.991444	-0.148661	0.544579
Yhes	P63389	YHES_ECOLI	Uncharacterized ABC transporter ATP-binding protein YheS	18.7765	19.1973	0.458048	0.368756	-1.23967	0.285707	0.991444	-0.420874	0.54408
Yccu	P75874	YCCU_ECOLI	Uncharacterized protein YccU	21.4516	20.0694	1.6772	0.578807	1.34929	0.287596	0.991444	1.38218	0.541217
Prmb	P39199	PRMB_ECOLI	50S ribosomal protein L3 glutamine methyltransferase	21.1033	20.9896	0.137998	0.0438546	1.35914	0.287706	0.991444	0.113624	0.541052
Rph	P0CG19	RNPH_ECOLI	Inactive ribonuclease PH	21.8634	21.181	0.157198	0.829945	1.39916	0.288918	0.991444	0.682353	0.539225
Ybff	P75736	YBFF_ECOLI	Esterase YbfF	21.0129	21.6406	0.766521	0.30605	-1.31715	0.291074	0.991444	-0.62765	0.535997
Tehb	P25397	TEHB_ECOLI	Tellurite methyltransferase	19.0732	17.7602	0.373832	1.60907	1.37668	0.291218	0.991444	1.313	0.535782
Yoab	P0AEB7	YOAB_ECOLI	RutC family protein YoaB	20.4979	21.3575	1.05233	0.192397	-1.39183	0.291307	0.991444	-0.859643	0.535649
Zapd	P36680	ZAPD_ECOLI	Cell division protein ZapD	21.7613	21.4472	0.146227	0.385336	1.32008	0.292275	0.991444	0.314119	0.534208
Ubig	P17993	UBIG_ECOLI	Ubiquinone biosynthesis O-methyltransferase	21.7868	21.4119	0.142352	0.462207	1.34264	0.293243	0.991444	0.374899	0.532772
Murc	P17952	MURC_ECOLI	UDP-N-acetylmuramate--L-alanine ligase	21.2886	20.8784	0.487431	0.302746	1.23826	0.295457	0.991444	0.410213	0.529506
Ygim	P0ADT8	YGIM_ECOLI	Uncharacterized protein YgiM	21.6893	21.6288	0.0742749	0.035998	1.27129	0.296286	0.991444	0.0605817	0.528288
Anmk	P77570	ANMK_ECOLI	Anhydro-N-acetylmuramic acid kinase	19.3183	19.8317	0.622666	0.342786	-1.2509	0.296801	0.991444	-0.513336	0.527534
Uspd	P0AAB8	USPD_ECOLI	Universal stress protein D	20.1575	19.4488	0.327058	0.8819	1.3051	0.297512	0.991444	0.708736	0.526496
Nuok	P0AFE4	NUOK_ECOLI	NADH-quinone oxidoreductase subunit K	19.5483	19.6277	0.100081	0.0281553	-1.32207	0.301627	0.991444	-0.0793571	0.52053
Efeo	P0AB24	EFEO_ECOLI	Iron uptake system component EfeO	24.5967	24.0641	0.460764	0.616943	1.19801	0.301948	0.991444	0.532598	0.520068
Dut	P06968	DUT_ECOLI	Deoxyuridine 5'-triphosphate nucleotidohydrolase	19.7464	20.2464	0.415405	0.587676	-1.20337	0.301963	0.991444	-0.500002	0.520046
Mtnn	P0AF12	MTNN_ECOLI	5'-methylthioadenosine/S-adenosylhomocysteine nucleosidase	22.8619	22.4616	0.0737946	0.506461	1.3546	0.30365	0.991444	0.400277	0.517627
Crp	P0ACJ8	CRP_ECOLI	cAMP-activated global transcriptional regulator CRP	23.7453	23.4403	0.182532	0.381349	1.24942	0.30369	0.991444	0.304974	0.51757
Purc	P0A7D7	PUR7_ECOLI	Phosphoribosylaminoimidazole-succinocarboxamide synthase	24.8045	24.461	0.133276	0.437876	1.30014	0.305675	0.991444	0.343573	0.51474
Rplb	P60422	RL2_ECOLI	50S ribosomal protein L2	25.6352	25.7489	0.142795	0.0689293	-1.2414	0.305853	0.991444	-0.113645	0.514487
Cdd	P0ABF6	CDD_ECOLI	Cytidine deaminase	20.8181	19.9116	0.381602	1.15641	1.28936	0.306291	0.991444	0.906502	0.513865
Aspa	P0AC38	ASPA_ECOLI	Aspartate ammonia-lyase	20.3641	19.6743	0.262225	0.88124	1.29961	0.306493	0.991444	0.689875	0.513579
Folp	P0AC13	DHPS_ECOLI	Dihydropteroate synthase	20.6309	20.1643	0.439774	0.527889	1.17617	0.306714	0.991444	0.466563	0.513266
Yicc	P23839	YICC_ECOLI	UPF0701 protein YicC	22.3575	22.1837	0.039214	0.222114	1.33456	0.307049	0.991444	0.173787	0.512793
Glgc	P0A6V1	GLGC_ECOLI	Glucose-1-phosphate adenylyltransferase	22.3683	22.1677	0.152107	0.246107	1.20064	0.308205	0.991444	0.200553	0.51116
Wecc	P27829	WECC_ECOLI	UDP-N-acetyl-D-mannosamine dehydrogenase	19.5451	19.8914	0.443908	0.0230475	-1.34948	0.30904	0.991444	-0.346325	0.509985
Ydbk	P52647	NIFJ_ECOLI	Probable pyruvate-flavodoxin oxidoreductase	20.7282	20.001	0.00722165	0.936019	1.34564	0.310661	0.991444	0.727222	0.507714
Hslv	P0A7B8	HSLV_ECOLI	ATP-dependent protease subunit HslV	20.8663	21.4376	0.0973324	0.738143	-1.32913	0.311384	0.991444	-0.571333	0.506704
Rsta	P52108	RSTA_ECOLI	Transcriptional regulatory protein RstA	21.7263	21.043	0.178305	0.886254	1.3093	0.312261	0.991444	0.683368	0.505482
Glcb	P37330	MASZ_ECOLI	Malate synthase G	21.5704	21.6893	0.0897726	0.147847	-1.18992	0.312628	0.991444	-0.118828	0.504972
Oppa	P23843	OPPA_ECOLI	Periplasmic oligopeptide-binding protein	24.909	24.579	0.195147	0.42588	1.22016	0.315002	0.991444	0.330011	0.501686
Oxyr	P0ACQ4	OXYR_ECOLI	Hydrogen peroxide-inducible genes activator	21.8849	21.4697	0.202806	0.54204	1.24248	0.316114	0.991444	0.415157	0.500156
Quee	P64554	QUEE_ECOLI	7-carboxy-7-deazaguanine synthase	18.0574	18.7633	0.921768	0.346426	-1.24163	0.316214	0.991444	-0.7059	0.500018
Fabr	P0ACU5	FABR_ECOLI	HTH-type transcriptional repressor FabR	19.8193	20.1639	0.0273068	0.452473	-1.31687	0.317727	0.991444	-0.344638	0.497946
Ycbb	P22525	YCBB_ECOLI	Probable L,D-transpeptidase YcbB	19.4226	19.7657	0.354401	0.382668	-1.13912	0.318586	0.991444	-0.343021	0.496773
Gntr	P0ACP5	GNTR_ECOLI	HTH-type transcriptional regulator GntR	16.2649	17.526	1.66476	0.177673	-1.30461	0.319483	0.991444	-1.26104	0.495553
Yeay	P0AA91	YEAY_ECOLI	Uncharacterized lipoprotein YeaY	21.1788	20.7513	0.440355	0.481223	1.13517	0.320171	0.991444	0.427508	0.494618
Msck	P77338	MSCK_ECOLI	Mechanosensitive channel MscK	17.4623	18.2694	1.07123	0.385547	-1.22785	0.322135	0.991444	-0.807078	0.491962
Suca	P0AFG3	ODO1_ECOLI	2-oxoglutarate dehydrogenase E1 component	25.6224	25.4041	0.0836768	0.290795	1.24949	0.322373	0.991444	0.218289	0.491641
Nfi	P68739	NFI_ECOLI	Endonuclease V	18.767	18.4984	0.177131	0.350782	1.18423	0.322698	0.991444	0.268677	0.491203
Pyrc	P05020	PYRC_ECOLI	Dihydroorotase	21.5805	21.0624	0.335329	0.67888	1.18526	0.323317	0.991444	0.518148	0.490372
Kdsd	P45395	KDSD_ECOLI	Arabinose 5-phosphate isomerase KdsD	21.5437	21.0306	0.601096	0.507503	1.1297	0.3234	0.991444	0.513103	0.49026
Prkb	P0AEX5	KPPR_ECOLI	Probable phosphoribulokinase	20.1484	19.2576	0.218068	1.19169	1.27367	0.323896	0.991444	0.890861	0.489594
Rffg	P27830	RMLB2_ECOLI	dTDP-glucose 4,6-dehydratase 2	18.044	19.1515	1.48025	0.524034	-1.22155	0.324716	0.991444	-1.10746	0.488496
Fhua	P06971	FHUA_ECOLI	Ferrichrome-iron receptor	22.5572	23.2171	0.856665	0.476837	-1.1658	0.32477	0.991444	-0.659905	0.488424
Mug	P0A9H1	MUG_ECOLI	G/U mismatch-specific DNA glycosylase	17.9529	18.6252	0.186326	0.903407	-1.26224	0.325549	0.991444	-0.672221	0.487384
Yohf	P33368	YOHF_ECOLI	Uncharacterized oxidoreductase YohF	20.1124	17.7567	0.954922	3.16365	1.2347	0.325613	0.991444	2.35572	0.487298
Tryp_pig	P00761	TRYP_PIG	Trypsin	24.9561	25.1523	0.0816724	0.263528	-1.23163	0.325805	0.991444	-0.196183	0.487042
Yibf	P0ACA1	YIBF_ECOLI	Uncharacterized GST-like protein YibF	18.2185	16.4895	0.470842	2.327	1.26133	0.32612	0.991444	1.72894	0.486623
Mraz	P22186	MRAZ_ECOLI	Protein MraZ	17.9593	17.2219	0.0898389	0.992863	1.2812	0.326843	0.991444	0.73742	0.485661
Ansa	P0A962	ASPG1_ECOLI	L-asparaginase 1	20.1408	19.2211	0.539504	1.2288	1.18704	0.327764	0.991444	0.919735	0.484439
Ribc	P0AFU8	RISA_ECOLI	Riboflavin synthase	21.5943	21.2579	0.199781	0.450359	1.1828	0.328764	0.991444	0.336447	0.483116
Rplq	P0AG44	RL17_ECOLI	50S ribosomal protein L17	24.7861	24.9258	0.135791	0.168618	-1.11758	0.328965	0.991444	-0.139692	0.48285
Yfip	Q47319	YFIP_ECOLI	DTW domain-containing protein YfiP	18.1751	20.5473	3.21809	0.312394	-1.27081	0.329597	0.991444	-2.37222	0.482017
Pfla	P0A9N4	PFLA_ECOLI	Pyruvate formate-lyase 1-activating enzyme	20.7047	19.7769	0.195521	1.26142	1.25886	0.330132	0.991444	0.927748	0.481312
Ugd	P76373	UDG_ECOLI	UDP-glucose 6-dehydrogenase	23.9262	23.7822	0.162658	0.156993	1.10343	0.331829	0.991444	0.144017	0.479086
Osmc	P0C0L2	OSMC_ECOLI	Peroxiredoxin OsmC	17.3518	18.5263	1.24686	1.36132	-1.102	0.332749	0.991444	-1.17452	0.477883
Ppk	P0A7B1	PPK_ECOLI	Polyphosphate kinase	21.9987	21.6494	0.447139	0.302487	1.12075	0.333097	0.991444	0.349316	0.477429
Ygge	P0ADS6	YGGE_ECOLI	Uncharacterized protein YggE	20.8685	20.1813	0.629781	0.865344	1.11204	0.333875	0.991444	0.687139	0.476416
Accd	P0A9Q5	ACCD_ECOLI	Acetyl-coenzyme A carboxylase carboxyl transferase subunit beta	23.8509	23.5574	0.117881	0.403084	1.21038	0.334162	0.991444	0.293478	0.476043
Cysh	P17854	CYSH_ECOLI	Phosphoadenosine phosphosulfate reductase	20.717	20.0329	0.197309	0.941654	1.23155	0.334599	0.991444	0.684089	0.475475
Pldb	P07000	PLDB_ECOLI	Lysophospholipase L2	13.5293	13.1416	0.533696	0.0315968	1.25626	0.335129	0.991444	0.387767	0.474788
Iles	P00956	SYI_ECOLI	Isoleucine--tRNA ligase	24.9441	25.0494	0.0791903	0.140042	-1.13432	0.335309	0.991444	-0.105362	0.474554
Orn	P0A784	ORN_ECOLI	Oligoribonuclease	20.4701	20.2286	0.174185	0.323126	1.1394	0.335529	0.991444	0.24148	0.47427
Trmj	P0AE01	TRMJ_ECOLI	tRNA (cytidine/uridine-2'-O-)-methyltransferase TrmJ	20.9655	21.3535	0.535307	0.0899479	-1.23809	0.335554	0.991444	-0.388007	0.474238
Ycei	P0A8X2	YCEI_ECOLI	Protein YceI	21.0891	20.5211	0.478784	0.739275	1.11713	0.336087	0.991444	0.568076	0.473549
Mhpd	P77608	MHPD_ECOLI	2-keto-4-pentenoate hydratase	22.7571	22.9853	0.0480837	0.315335	-1.239	0.336251	0.991444	-0.228178	0.473337
Acna	P25516	ACON1_ECOLI	Aconitate hydratase 1	23.3015	23.1434	0.165931	0.188215	1.09137	0.337336	0.991444	0.158101	0.471938
Yeig	P33018	SFGH2_ECOLI	S-formylglutathione hydrolase YeiG	19.6684	19.0962	0.674365	0.614264	1.08661	0.338799	0.991444	0.572264	0.470057
Recc	P07648	RECC_ECOLI	RecBCD enzyme subunit RecC	17.3688	19.0061	2.27791	0.736847	-1.1845	0.33967	0.991444	-1.63727	0.468942
Arod	P05194	AROD_ECOLI	3-dehydroquinate dehydratase	22.3194	21.766	0.346249	0.761986	1.1453	0.340697	0.991444	0.553434	0.467631
Yebt	P76272	YEBT_ECOLI	Uncharacterized protein YebT	18.6272	18.0496	0.662855	0.651732	1.07626	0.34241	0.991444	0.577627	0.465453
Acka	P0A6A3	ACKA_ECOLI	Acetate kinase	24.0203	23.8559	0.0883558	0.229344	1.15886	0.342433	0.991444	0.164441	0.465425
Epd	P0A9B6	E4PD_ECOLI	D-erythrose-4-phosphate dehydrogenase	21.2392	21.0426	0.0784261	0.276035	1.18621	0.342729	0.991444	0.196526	0.46505
Ompx	P0A917	OMPX_ECOLI	Outer membrane protein X	22.5185	23.3398	1.15168	0.382759	-1.17214	0.342944	0.991444	-0.8213	0.464777
Mlac	P0ADV7	MLAC_ECOLI	Probable phospholipid-binding protein MlaC	22.7412	22.2346	0.5548	0.599436	1.07413	0.343575	0.991444	0.506526	0.463978
Rpsb	P0A7V0	RS2_ECOLI	30S ribosomal protein S2	25.2126	25.2913	0.0565753	0.10771	-1.11965	0.343802	0.991444	-0.0786478	0.463692
Sbp	P0AG78	SUBI_ECOLI	Sulfate-binding protein	20.4206	21.2335	1.05152	0.758886	-1.08574	0.34423	0.991444	-0.812877	0.463151
Asnb	P22106	ASNB_ECOLI	Asparagine synthetase B [glutamine-hydrolyzing]	24.9087	24.9815	0.0621169	0.0969033	-1.09496	0.344852	0.991444	-0.0727655	0.462367
Degs	P0AEE3	DEGS_ECOLI	Serine endoprotease DegS	18.995	17.0442	0.930657	2.74957	1.164	0.345106	0.991444	1.95079	0.462047
Rlub	P37765	RLUB_ECOLI	Ribosomal large subunit pseudouridine synthase B	19.8903	20.17	0.373836	0.2361	-1.09567	0.345156	0.991444	-0.279697	0.461985
Pnp	P05055	PNP_ECOLI	Polyribonucleotide nucleotidyltransferase	25.7201	25.823	0.0608461	0.143943	-1.14055	0.345279	0.991444	-0.102906	0.46183
Qsec	P40719	QSEC_ECOLI	Sensor protein QseC	17.9936	17.7962	0.150166	0.26935	1.10845	0.345418	0.991444	0.197353	0.461656
Add	P22333	ADD_ECOLI	Adenosine deaminase	20.2251	20.0168	0.102987	0.294285	1.15717	0.346347	0.991444	0.208302	0.460489
Ubid	P0AAB4	UBID_ECOLI	3-octaprenyl-4-hydroxybenzoate carboxy-lyase	21.4815	21.2405	0.149218	0.337315	1.13149	0.346681	0.991444	0.240956	0.460069
Yibt	Q2M7R5	YIBT_ECOLI	Uncharacterized protein YibT	19.5058	20.5315	1.38975	0.839016	-1.09436	0.347438	0.991444	-1.0257	0.459123
Prfc	P0A7I4	RF3_ECOLI	Peptide chain release factor 3	22.1018	22.2578	0.209427	0.135226	-1.08406	0.348765	0.991444	-0.156026	0.457467
Frda	P00363	FRDA_ECOLI	Fumarate reductase flavoprotein subunit	18.1409	17.7989	0.303095	0.456723	1.08062	0.349082	0.991444	0.341986	0.457073
Yecd	P0ADI7	YECD_ECOLI	Isochorismatase family protein YecD	21.5672	21.3263	0.171771	0.335128	1.10778	0.349205	0.991444	0.240855	0.456919
Yigb	P0ADP0	YIGB_ECOLI	Flavin mononucleotide phosphatase YigB	19.3821	18.6957	0.22027	0.984899	1.17805	0.350485	0.991444	0.686423	0.455331
Plsb	P0A7A7	PLSB_ECOLI	Glycerol-3-phosphate acyltransferase	22.3277	22.0121	0.157621	0.450669	1.14515	0.350494	0.991444	0.31566	0.455319
Ftsa	P0ABH0	FTSA_ECOLI	Cell division protein FtsA	21.9986	21.7133	0.286535	0.366031	1.06317	0.350821	0.991444	0.285332	0.454914
Lrha	P36771	LRHA_ECOLI	Probable HTH-type transcriptional regulator LrhA	19.2008	19.7555	0.312396	0.790903	-1.1299	0.351612	0.991444	-0.554731	0.453937
Iclr	P16528	ICLR_ECOLI	Acetate operon repressor	16.1038	16.4925	0.435605	0.467419	-1.05357	0.351786	0.991444	-0.388649	0.453722
Manz	P69805	PTND_ECOLI	Mannose permease IID component	24.0411	24.2548	0.0399519	0.307759	-1.19277	0.351873	0.991444	-0.213716	0.453614
Cspc	P0A9Y6	CSPC_ECOLI	Cold shock-like protein CspC	24.2045	24.7438	0.542412	0.694663	-1.05992	0.352189	0.991444	-0.539332	0.453225
Mhpt	P77589	MHPT_ECOLI	3-(3-hydroxy-phenyl)propionate transporter	15.4913	16.9297	1.32794	1.91644	-1.06856	0.352292	0.991444	-1.43842	0.453097
Nuon	P0AFF0	NUON_ECOLI	NADH-quinone oxidoreductase subunit N	13.8785	15.1404	0.892864	1.77561	-1.0998	0.352967	0.991444	-1.26198	0.452266
Mana	P00946	MANA_ECOLI	Mannose-6-phosphate isomerase	21.3661	21.6313	0.291176	0.325515	-1.05158	0.353001	0.991444	-0.26516	0.452224
Fbab	P0A991	ALF1_ECOLI	Fructose-bisphosphate aldolase class 1	21.3124	21.0706	0.277936	0.286258	1.04978	0.353106	0.991444	0.241823	0.452094
Apah	P05637	APAH_ECOLI	Bis(5'-nucleosyl)-tetraphosphatase [symmetrical]	19.0893	18.3629	0.721876	0.945453	1.05767	0.353672	0.991444	0.726384	0.4514
Mqo	P33940	MQO_ECOLI	Malate:quinone oxidoreductase	15.2598	14.7265	0.771492	0.0315968	1.19631	0.353814	0.991444	0.533309	0.451225
Dsbc	P0AEG6	DSBC_ECOLI	Thiol:disulfide interchange protein DsbC	20.0651	20.646	0.644193	0.711047	-1.04863	0.354061	0.991444	-0.580883	0.450922
Weca	P0AC78	WECA_ECOLI	Undecaprenyl-phosphate alpha-N-acetylglucosaminyl 1-phosphate transferase	17.1679	16.7868	0.159207	0.551177	1.15067	0.354156	0.991444	0.381138	0.450806
Feca	P13036	FECA_ECOLI	Fe(3+) dicitrate transport protein FecA	19.2824	21.2167	2.80469	0.280078	-1.18862	0.35456	0.991444	-1.93429	0.450311
Ivy	P0AD59	IVY_ECOLI	Inhibitor of vertebrate lysozyme	19.4559	18.855	0.163731	0.871724	1.17356	0.354576	0.991444	0.60097	0.450291
Galu	P0AEP3	GALU_ECOLI	UTP--glucose-1-phosphate uridylyltransferase	23.2828	23.0614	0.0889663	0.320694	1.15206	0.354685	0.991444	0.221362	0.450157
Fabf	P0AAI5	FABF_ECOLI	3-oxoacyl-[acyl-carrier-protein] synthase 2	24.6986	24.7801	0.118534	0.0193007	-1.17633	0.355297	0.991444	-0.0815631	0.449409
Mlaf	P63386	MLAF_ECOLI	Probable phospholipid import ATP-binding protein MlaF	21.9589	21.2626	0.110659	1.01178	1.18489	0.355353	0.991444	0.69628	0.44934
Yrap	P64596	YRAP_ECOLI	Uncharacterized protein YraP	22.816	22.5307	0.15607	0.411866	1.12204	0.355887	0.991444	0.285325	0.448688
Yfjw	P52138	YFJW_ECOLI	Uncharacterized protein YfjW	17.2697	19.8947	3.82123	0.140051	-1.18903	0.356185	0.991444	-2.62498	0.448324
Selb	P14081	SELB_ECOLI	Selenocysteine-specific elongation factor	21.2625	21.0994	0.200705	0.182151	1.04272	0.356459	0.991444	0.163169	0.44799
Puue	P50457	PUUE_ECOLI	4-aminobutyrate aminotransferase PuuE	18.5711	18.1144	0.34069	0.648605	1.07969	0.358741	0.991444	0.456697	0.445219
Yggn	P0ADS9	YGGN_ECOLI	Uncharacterized protein YggN	20.7199	20.4499	0.369167	0.248445	1.0509	0.360321	0.991444	0.269988	0.44331
Dmsd	P69853	DMSD_ECOLI	Tat proofreading chaperone DmsD	18.9406	20.057	1.6447	0.499289	-1.12508	0.36168	0.991444	-1.11648	0.441675
Mscm	P39285	MSCM_ECOLI	Miniconductance mechanosensitive channel MscM	18.6035	17.8509	0.678655	1.0441	1.04685	0.363185	0.991444	0.752642	0.439872
Usg	P08390	USG_ECOLI	USG-1 protein	23.7729	23.835	0.0917396	0.0315689	-1.10872	0.363839	0.991444	-0.0621038	0.439091
Yhhx	P46853	YHHX_ECOLI	Uncharacterized oxidoreductase YhhX	21.3752	21.0586	0.194672	0.46444	1.08865	0.364362	0.991444	0.316523	0.438466
Rmf	P0AFW2	RMF_ECOLI	Ribosome modulation factor	16.5299	17.9781	2.0554	1.20663	-1.05243	0.364836	0.991444	-1.4482	0.437903
Rapa	P60240	RAPA_ECOLI	RNA polymerase-associated protein RapA	20.5159	20.886	0.551441	0.115852	-1.13763	0.364978	0.991444	-0.3701	0.437733
Ytfq	P39325	YTFQ_ECOLI	ABC transporter periplasmic-binding protein YtfQ	19.0779	16.9313	1.73609	3.06521	1.05542	0.365083	0.991444	2.14655	0.437608
Pnta	P07001	PNTA_ECOLI	NAD(P) transhydrogenase subunit alpha	24.5762	24.7499	0.132218	0.252043	-1.05693	0.367587	0.991444	-0.173679	0.43464
Atpf	P0ABA0	ATPF_ECOLI	ATP synthase subunit b	24.2028	24.0724	0.176831	0.131167	1.02532	0.367672	0.991444	0.130332	0.434539
Mppa	P77348	MPPA_ECOLI	Periplasmic murein peptide-binding protein	16.2733	16.5601	0.170341	0.425806	-1.08304	0.368159	0.991444	-0.286769	0.433964
Ybed	P0A8J4	YBED_ECOLI	UPF0250 protein YbeD	18.0627	18.5016	0.269889	0.65085	-1.07899	0.368365	0.991444	-0.438929	0.433722
Gcvp	P33195	GCSP_ECOLI	Glycine dehydrogenase (decarboxylating)	24.231	24.2865	0.081214	0.041006	-1.05519	0.369807	0.991444	-0.055426	0.432025
Xerd	P0A8P8	XERD_ECOLI	Tyrosine recombinase XerD	16.1374	17.3574	1.84044	0.516584	-1.10539	0.370604	0.991444	-1.21996	0.43109
Nrdf	P37146	RIR4_ECOLI	Ribonucleoside-diphosphate reductase 2 subunit beta	19.9927	18.9276	0.252286	1.611	1.13134	0.370615	0.991444	1.0651	0.431076
Hism	P0AEU3	HISM_ECOLI	Histidine transport system permease protein HisM	19.5781	17.6098	0.14317	2.97713	1.14382	0.370676	0.991444	1.96833	0.431006
Degq	P39099	DEGQ_ECOLI	Periplasmic pH-dependent serine endoprotease DegQ	22.4383	22.3209	0.155442	0.127073	1.0121	0.370834	0.991444	0.117319	0.43082
Ddlb	P07862	DDLB_ECOLI	D-alanine--D-alanine ligase B	22.0421	21.6443	0.384952	0.553292	1.02226	0.370883	0.991444	0.397814	0.430763
Nupc	P0AFF2	NUPC_ECOLI	Nucleoside permease NupC	20.7824	20.6382	0.213333	0.101614	1.05666	0.371564	0.991444	0.144156	0.429966
Sodb	P0AGD3	SODF_ECOLI	Superoxide dismutase [Fe]	23.6703	24.0392	0.332474	0.526309	-1.02622	0.372594	0.991444	-0.36884	0.428764
Nuof	P31979	NUOF_ECOLI	NADH-quinone oxidoreductase subunit F	24.151	24.2183	0.030692	0.101809	-1.09483	0.372613	0.991444	-0.0672144	0.428742
Asps	P21889	SYD_ECOLI	Aspartate--tRNA ligase	25.5702	25.4687	0.0197504	0.154418	1.12927	0.37284	0.991444	0.101498	0.428477
Yfbu	P0A8W8	YFBU_ECOLI	UPF0304 protein YfbU	24.1898	23.8867	0.150482	0.459578	1.08572	0.373661	0.991444	0.303132	0.427522
Nuoc	P33599	NUOCD_ECOLI	NADH-quinone oxidoreductase subunit C/D	24.857	24.7628	0.0547455	0.1422	1.07071	0.374115	0.991444	0.0941939	0.426995
Pure	P0AG18	PURE_ECOLI	N5-carboxyaminoimidazole ribonucleotide mutase	21.8241	21.3441	0.165383	0.733923	1.10499	0.375162	0.991444	0.479957	0.425781
Metq	P28635	METQ_ECOLI	D-methionine-binding lipoprotein MetQ	25.4494	25.6143	0.252675	0.0791762	-1.07853	0.377529	0.991444	-0.164881	0.42305
Tesb	P0AGG2	TESB_ECOLI	Acyl-CoA thioesterase 2	15.8489	14.0587	2.59625	1.61901	1.01339	0.378353	0.991444	1.79017	0.422103
Hfld	P25746	HFLD_ECOLI	High frequency lysogenization protein HflD	19.9751	19.62	0.0973275	0.548496	1.1042	0.378731	0.991444	0.355133	0.421669
Rpso	P0ADZ4	RS15_ECOLI	30S ribosomal protein S15	23.2737	23.4664	0.258121	0.216351	-0.991046	0.379351	0.991444	-0.192711	0.420958
Dusa	P32695	DUSA_ECOLI	tRNA-dihydrouridine synthase A	18.3207	17.4317	1.04817	1.15614	0.986733	0.380131	0.991444	0.889033	0.420067
Narx	P0AFA2	NARX_ECOLI	Nitrate/nitrite sensor protein NarX	14.0689	13.1416	1.43989	0.0315968	1.11523	0.38069	0.991444	0.927335	0.419429
Nagz	P75949	NAGZ_ECOLI	Beta-hexosaminidase	18.7733	19.2197	0.684969	0.280298	-1.04459	0.381958	0.991444	-0.44635	0.417984
Dapa	P0A6L2	DAPA_ECOLI	4-hydroxy-tetrahydrodipicolinate synthase	23.5078	23.4002	0.0966875	0.159447	0.999914	0.385002	0.991444	0.10765	0.414537
Thra	P00561	AK1H_ECOLI	Bifunctional aspartokinase/homoserine dehydrogenase 1	25.4692	25.3181	0.0280718	0.2373	1.09476	0.385207	0.991444	0.151034	0.414305
Plsx	P27247	PLSX_ECOLI	Phosphate acyltransferase	21.812	20.844	0.0301542	1.52878	1.0965	0.387185	0.991444	0.968003	0.412081
Agp	P19926	AGP_ECOLI	Glucose-1-phosphatase	21.7912	20.6933	0.608203	1.71949	1.04268	0.387515	0.991444	1.09797	0.411712
Rlme	P0C0R7	RLME_ECOLI	Ribosomal RNA large subunit methyltransferase E	20.5055	20.0142	0.619912	0.625349	0.966438	0.388557	0.991444	0.491318	0.410546
Yegq	P76403	YEGQ_ECOLI	Uncharacterized protease YegQ	21.5358	21.1489	0.583346	0.334552	0.996391	0.388571	0.991444	0.386851	0.41053
Ddpa	P76128	DDPA_ECOLI	Probable D,D-dipeptide-binding periplasmic protein DdpA	19.0301	20.0843	1.66872	0.453058	-1.05599	0.389374	0.991444	-1.05421	0.409633
Frub	P69811	PTFAH_ECOLI	Multiphosphoryl transfer protein	21.2789	21.0467	0.0357712	0.369128	1.08438	0.38973	0.991444	0.232182	0.409236
Nrdb	P69924	RIR2_ECOLI	Ribonucleoside-diphosphate reductase 1 subunit beta	21.5797	21.6926	0.162265	0.118109	-0.974411	0.389845	0.991444	-0.112908	0.409109
Rrab	P0AF90	RRAB_ECOLI	Regulator of ribonuclease activity B	17.8515	15.8536	1.82737	2.99574	0.986148	0.390595	0.991444	1.99791	0.408273
Sure	P0A840	SURE_ECOLI	5'/3'-nucleotidase SurE	19.235	17.7206	0.824547	2.39495	1.03559	0.391061	0.991444	1.51442	0.407755
Der	P0A6P5	DER_ECOLI	GTPase Der	22.5246	22.3417	0.116103	0.287303	1.02226	0.391151	0.991444	0.182889	0.407656
Cysj	P38038	CYSJ_ECOLI	Sulfite reductase [NADPH] flavoprotein alpha-component	24.4279	24.6158	0.134222	0.29265	-1.01076	0.391202	0.991444	-0.187886	0.407599
Gata	P69828	PTKA_ECOLI	Galactitol-specific phosphotransferase enzyme IIA component	22.9075	22.9738	0.084645	0.0844819	-0.960251	0.391307	0.991444	-0.0663013	0.407482
Iscr	P0AGK8	ISCR_ECOLI	HTH-type transcriptional regulator IscR	17.0675	15.7265	2.15112	0.0315968	1.07963	0.393156	0.991444	1.341	0.405435
Glns	P00962	SYQ_ECOLI	Glutamine--tRNA ligase	24.3196	24.3722	0.0578084	0.075063	-0.960979	0.394271	0.991444	-0.0525656	0.404205
Pyre	P0A7E3	PYRE_ECOLI	Orotate phosphoribosyltransferase	21.4747	20.7979	0.134743	1.08985	1.06747	0.394706	0.991444	0.676788	0.403726
Ftsx	P0AC30	FTSX_ECOLI	Cell division protein FtsX	18.6992	19.2694	0.875412	0.500819	-0.979196	0.395923	0.991444	-0.570171	0.402389
Nagc	P0AF20	NAGC_ECOLI	N-acetylglucosamine repressor	21.0915	20.8541	0.195898	0.3692	0.983953	0.396752	0.991444	0.237433	0.401481
Ssea	P31142	THTM_ECOLI	3-mercaptopyruvate sulfurtransferase	22.0405	21.6731	0.299825	0.572268	0.984897	0.396836	0.991444	0.367366	0.401389
Usha	P07024	USHA_ECOLI	Protein UshA	21.3829	21.1704	0.0786994	0.34368	1.0438	0.397172	0.991444	0.212475	0.401021
Yceh	P29217	YCEH_ECOLI	UPF0502 protein YceH	21.9625	22.0633	0.15953	0.0757967	-0.989052	0.398787	0.991444	-0.100856	0.399259
Fepa	P05825	FEPA_ECOLI	Ferrienterobactin receptor	25.075	25.3982	0.445914	0.390752	-0.944174	0.3994	0.991444	-0.323199	0.398592
Csra	P69913	CSRA_ECOLI	Carbon storage regulator	20.5856	20.921	0.237236	0.53462	-0.993284	0.399543	0.991444	-0.33542	0.398437
Uspf	P37903	USPF_ECOLI	Universal stress protein F	22.3659	22.0718	0.250123	0.458734	0.974859	0.399574	0.991444	0.294077	0.398403
Rdgb	P52061	RDGB_ECOLI	dITP/XTP pyrophosphatase	18.5213	18.9509	0.548194	0.57151	-0.939481	0.400761	0.991444	-0.429546	0.397114
Mfd	P30958	MFD_ECOLI	Transcription-repair-coupling factor	22.8363	23.0087	0.278551	0.106904	-1.00089	0.40141	0.991444	-0.172412	0.396412
Mure	P22188	MURE_ECOLI	UDP-N-acetylmuramoyl-L-alanyl-D-glutamate--2,6-diaminopimelate ligase	21.9346	21.7713	0.0486323	0.267429	1.04052	0.401533	0.991444	0.163291	0.396279
Nfsa	P17117	NFSA_ECOLI	Oxygen-insensitive NADPH nitroreductase	21.9348	21.3833	0.479129	0.862051	0.968388	0.401622	0.991444	0.551414	0.396182
Yidc	P25714	YIDC_ECOLI	Membrane protein insertase YidC	22.6143	22.4254	0.0607662	0.309594	1.037	0.401954	0.991444	0.188894	0.395824
Engb	P0A6P7	ENGB_ECOLI	Probable GTP-binding protein EngB	21.9287	21.5432	0.311833	0.611404	0.97279	0.402962	0.991444	0.385473	0.394735
Rela	P0AG20	RELA_ECOLI	GTP pyrophosphokinase	21.3978	21.5262	0.162569	0.173727	-0.934923	0.402973	0.991444	-0.128429	0.394724
Dhal	P76014	DHAL_ECOLI	PTS-dependent dihydroxyacetone kinase, ADP-binding subunit DhaL	20.1308	20.4281	0.287435	0.456734	-0.954152	0.403325	0.991444	-0.297284	0.394345
Yajc	P0ADZ7	YAJC_ECOLI	UPF0092 membrane protein YajC	23.5219	23.6937	0.170226	0.262744	-0.950972	0.403743	0.991444	-0.171888	0.393895
Uxua	P24215	UXUA_ECOLI	Mannonate dehydratase	23.3651	22.1319	0.0811305	2.03437	1.04913	0.403901	0.991444	1.23323	0.393725
Purf	P0AG16	PUR1_ECOLI	Amidophosphoribosyltransferase	22.8913	23.0052	0.177315	0.105955	-0.955705	0.404465	0.991444	-0.113975	0.393119
Ybjx	P75829	YBJX_ECOLI	Uncharacterized protein YbjX	14.1177	14.5626	0.308389	0.721986	-0.981652	0.405692	0.991444	-0.444956	0.391804
Eno	P0A6P9	ENO_ECOLI	Enolase	26.9273	26.77	0.081539	0.259392	1.00193	0.406756	0.991444	0.157288	0.390666
Gros	P0A6F9	CH10_ECOLI	10 kDa chaperonin	24.3277	24.5981	0.216902	0.433899	-0.965421	0.406845	0.991444	-0.270384	0.390571
Tsae	P0AF67	TSAE_ECOLI	tRNA threonylcarbamoyladenosine biosynthesis protein TsaE	18.5494	16.3342	3.03725	2.81496	0.926543	0.406888	0.991444	2.21525	0.390525
Alac	P77434	ALAC_ECOLI	Glutamate-pyruvate aminotransferase AlaC	20.5934	20.1223	0.783109	0.0575975	1.03909	0.406897	0.991444	0.47107	0.390515
Artq	P0AE34	ARTQ_ECOLI	Arginine ABC transporter permease protein ArtQ	15.6412	14.2247	1.90533	1.85362	0.922989	0.408286	0.991444	1.41654	0.389036
Nudf	Q93K97	ADPP_ECOLI	ADP-ribose pyrophosphatase	17.8307	18.8091	0.667478	1.60167	-0.976624	0.408624	0.991444	-0.978391	0.388676
Phes	P08312	SYFA_ECOLI	Phenylalanine--tRNA ligase alpha subunit	24.1365	23.8177	0.135477	0.533523	1.00302	0.411026	0.991444	0.318766	0.386131
Hpt	P0A9M2	HPRT_ECOLI	Hypoxanthine phosphoribosyltransferase	22.4569	22.0868	0.162304	0.619187	1.00136	0.411071	0.991444	0.370068	0.386083
Kdgk	P37647	KDGK_ECOLI	2-dehydro-3-deoxygluconokinase	19.1132	18.6239	0.0568344	0.822764	1.02763	0.411287	0.991444	0.489313	0.385855
Lolb	P61320	LOLB_ECOLI	Outer-membrane lipoprotein LolB	21.8048	21.302	0.141391	0.844884	1.01668	0.411398	0.991444	0.502828	0.385737
Cbpm	P63264	CBPM_ECOLI	Chaperone modulatory protein CbpM	13.1177	14.0451	0.308389	1.55727	-1.01185	0.411433	0.991444	-0.927409	0.385701
Ylba	P75713	YLBA_ECOLI	Uncharacterized protein YlbA	15.4117	14.1284	1.69182	1.73965	0.916007	0.411528	0.991444	1.28335	0.3856
Rada	P24554	RADA_ECOLI	DNA repair protein RadA	19.9239	19.6245	0.44122	0.351468	0.919464	0.412299	0.991444	0.299452	0.384788
Ptsn	P69829	PTSN_ECOLI	Nitrogen regulatory protein	20.4588	20.2723	0.0354083	0.31445	1.02107	0.412347	0.991444	0.186545	0.384737
Yida	P0A8Y5	YIDA_ECOLI	Sugar phosphatase YidA	22.8075	22.4351	0.153379	0.626281	1.00044	0.412698	0.991444	0.372434	0.384367
Thrb	P00547	KHSE_ECOLI	Homoserine kinase	21.9803	21.6799	0.102548	0.507228	1.00543	0.413659	0.991444	0.300394	0.383358
Hupb	P0ACF4	DBHB_ECOLI	DNA-binding protein HU-beta	24.7264	24.5037	0.163052	0.367712	0.958844	0.413966	0.991444	0.222676	0.383035
Hpf	P0AFX0	HPF_ECOLI	Ribosome hibernation promoting factor	21.3877	20.9161	0.406901	0.76591	0.941974	0.414752	0.991444	0.471673	0.382211
Msyb	P25738	MSYB_ECOLI	Acidic protein MsyB	13.1177	14.6603	0.308389	2.62278	-1.01178	0.415686	0.991444	-1.54265	0.381235
Frsa	P04335	FRSA_ECOLI	Esterase FrsA	21.742	21.5781	0.232929	0.208418	0.908207	0.415726	0.991444	0.163892	0.381193
Nuoa	P0AFC3	NUOA_ECOLI	NADH-quinone oxidoreductase subunit A	20.6922	20.8459	0.145886	0.245925	-0.930663	0.415804	0.991444	-0.153641	0.381111
Glnb	P0A9Z1	GLNB_ECOLI	Nitrogen regulatory protein P-II 1	21.2269	20.9492	0.328047	0.41377	0.910656	0.41648	0.991444	0.277623	0.380406
Frmr	P0AAP3	FRMR_ECOLI	Transcriptional repressor FrmR	18.3963	16.6126	0.370326	3.03904	1.00912	0.416528	0.991444	1.78368	0.380356
Rsmb	P36929	RSMB_ECOLI	Ribosomal RNA small subunit methyltransferase B	21.8344	21.9518	0.200094	0.022471	-1.00966	0.416707	0.991444	-0.117374	0.38017
Moae	P30749	MOAE_ECOLI	Molybdopterin synthase catalytic subunit	13.1177	15.0158	0.308389	3.23845	-1.01062	0.41696	0.991444	-1.89813	0.379906
Ycar	P0AAZ7	YCAR_ECOLI	UPF0434 protein YcaR	13.1177	15.8927	0.308389	4.75723	-1.00824	0.418736	0.991444	-2.77502	0.37806
Dxr	P45568	DXR_ECOLI	1-deoxy-D-xylulose 5-phosphate reductoisomerase	17.9646	17.6238	0.103219	0.585408	0.993259	0.41997	0.991444	0.340885	0.376781
Pntb	P0AB67	PNTB_ECOLI	NAD(P) transhydrogenase subunit beta	23.6047	23.7477	0.0748992	0.244009	-0.970593	0.419996	0.991444	-0.143033	0.376755
Mind	P0AEZ3	MIND_ECOLI	Septum site-determining protein MinD	24.124	23.9259	0.0221193	0.341453	1.00322	0.420658	0.991444	0.198188	0.376071
Uxab	P0A6L7	UXAB_ECOLI	Altronate oxidoreductase	15.4396	16.4552	0.308389	1.74809	-0.990944	0.420874	0.991444	-1.01556	0.375848
Ycjy	P76049	YCJY_ECOLI	Uncharacterized protein YcjY	14.1177	15.3504	0.308389	2.12423	-0.994714	0.421043	0.991444	-1.23273	0.375673
Sece	P0AG96	SECE_ECOLI	Protein translocase subunit SecE	13.1177	14.3979	0.308389	2.20658	-0.995277	0.421082	0.991444	-1.28028	0.375633
Yhjg	P37645	YHJG_ECOLI	Uncharacterized protein YhjG	14.1177	15.4716	0.308389	2.33416	-0.996025	0.421141	0.991444	-1.35393	0.375572
Grea	P0A6W5	GREA_ECOLI	Transcription elongation factor GreA	21.6423	22.1246	0.732465	0.567651	-0.901635	0.421181	0.991444	-0.482391	0.375531
Phou	P0A9K7	PHOU_ECOLI	Phosphate-specific transport system accessory protein PhoU	20.8482	20.2364	0.103525	1.05554	0.999117	0.421287	0.991444	0.611801	0.375422
Cspd	P0A968	CSPD_ECOLI	Cold shock-like protein CspD	14.1177	15.6845	0.308389	2.70292	-0.99757	0.421298	0.991444	-1.56684	0.375411
Kgtp	P0AEX3	KGTP_ECOLI	Alpha-ketoglutarate permease	14.0721	13.1416	1.60903	0.0315968	1.00151	0.422	0.991444	0.930557	0.374687
Yeht	P0AFT5	YEHT_ECOLI	Transcriptional regulatory protein YehT	16.5796	15.4171	0.107187	2.01278	0.998972	0.422538	0.991444	1.16253	0.374134
Yadg	P36879	YADG_ECOLI	Uncharacterized ABC transporter ATP-binding protein YadG	21.5785	21.4919	0.075657	0.143401	0.924615	0.422681	0.991444	0.0865522	0.373987
Yajl	Q46948	YAJL_ECOLI	Chaperone protein YajL	20.4336	20.2083	0.133504	0.386382	0.954339	0.423686	0.991444	0.225242	0.372956
Hemx	P09127	HEMX_ECOLI	Putative uroporphyrinogen-III C-methyltransferase	22.6961	22.478	0.170682	0.368703	0.929788	0.425021	0.991444	0.218104	0.371589
Ybey	P0A898	YBEY_ECOLI	Endoribonuclease YbeY	17.4244	18.1953	1.28315	0.690803	-0.91624	0.425714	0.991444	-0.770891	0.370882
Cysn	P23845	CYSN_ECOLI	Sulfate adenylyltransferase subunit 1	23.3791	23.2876	0.146018	0.0986181	0.899573	0.425761	0.991444	0.0915134	0.370834
Znua	P39172	ZNUA_ECOLI	High-affinity zinc uptake system protein ZnuA	25.2277	24.9114	0.238044	0.537858	0.931475	0.425823	0.991444	0.316316	0.370771
Yqfb	P67603	YQFB_ECOLI	UPF0267 protein YqfB	19.7314	18.05	0.926115	2.90806	0.954263	0.425849	0.991444	1.68146	0.370744
Gpt	P0A9M5	XGPT_ECOLI	Xanthine phosphoribosyltransferase	18.0343	19.3472	2.29805	0.284561	-0.982002	0.426993	0.991444	-1.31285	0.36958
Tsab	P76256	TSAB_ECOLI	tRNA threonylcarbamoyladenosine biosynthesis protein TsaB	19.4821	18.0396	0.390967	2.54002	0.972215	0.429496	0.991444	1.44253	0.367041
Isph	P62623	ISPH_ECOLI	4-hydroxy-3-methylbut-2-enyl diphosphate reductase	20.6254	20.2109	0.104016	0.73012	0.973462	0.429553	0.991444	0.414492	0.366984
Diaa	P66817	DIAA_ECOLI	DnaA initiator-associating protein DiaA	19.0687	18.5669	0.387712	0.86012	0.921363	0.429642	0.991444	0.501876	0.366894
Tora	P33225	TORA_ECOLI	Trimethylamine-N-oxide reductase 1	16.7574	14.7325	2.8995	2.74783	0.877984	0.429659	0.991444	2.02493	0.366876
Rplp	P0ADY7	RL16_ECOLI	50S ribosomal protein L16	24.2728	24.3457	0.0513236	0.125764	-0.928572	0.42975	0.991444	-0.0728216	0.366785
Sped	P0A7F6	SPED_ECOLI	S-adenosylmethionine decarboxylase proenzyme	21.8831	21.5694	0.393219	0.475332	0.880637	0.429874	0.991444	0.313653	0.366659
Ybgc	P0A8Z3	YBGC_ECOLI	Acyl-CoA thioester hydrolase YbgC	14.9357	16.2078	1.71491	1.84372	-0.875054	0.431184	0.991444	-1.27211	0.365338
Hscb	P0A6L9	HSCB_ECOLI	Co-chaperone protein HscB	17.0825	18.7621	2.83853	1.56064	-0.898082	0.433231	0.991444	-1.67958	0.36328
Narl	P0AF28	NARL_ECOLI	Nitrate/nitrite response regulator protein NarL	22.0869	21.8291	0.0571691	0.458579	0.966078	0.433287	0.991444	0.257759	0.363225
Yhde	P25536	YHDE_ECOLI	Maf-like protein YhdE	17.461	16.3637	0.0570983	1.95621	0.971153	0.433765	0.991444	1.09731	0.362746
Yjei	P0AF70	YJEI_ECOLI	Uncharacterized protein YjeI	18.3612	17.6282	0.449662	1.28912	0.929886	0.433808	0.991444	0.732987	0.362703
Yghu	Q46845	YGHU_ECOLI	Disulfide-bond oxidoreductase YghU	22.0841	22.2406	0.263555	0.150253	-0.893868	0.433921	0.991444	-0.156565	0.362589
Yggt	P64564	YGGT_ECOLI	Uncharacterized protein YggT	20.9553	19.9851	0.443565	1.72719	0.942351	0.435405	0.991444	0.970199	0.361107
Trud	Q57261	TRUD_ECOLI	tRNA pseudouridine synthase D	20.7755	20.5318	0.138117	0.432999	0.928612	0.436648	0.991444	0.24367	0.359869
Menc	P29208	MENC_ECOLI	o-succinylbenzoate synthase	15.6327	17.0631	2.56935	0.140483	-0.9628	0.436719	0.991444	-1.43036	0.359798
Prob	P0A7B5	PROB_ECOLI	Glutamate 5-kinase	23.1962	22.8485	0.120417	0.623089	0.948972	0.436773	0.991444	0.347701	0.359744
Corc	P0AE78	CORC_ECOLI	Magnesium and cobalt efflux protein CorC	21.2824	19.9295	0.106955	2.43067	0.963058	0.436798	0.991444	1.35281	0.35972
Frua	P20966	PTFBC_ECOLI	PTS system fructose-specific EIIBC component	20.0484	19.7552	0.00964144	0.527274	0.96282	0.43717	0.991444	0.293152	0.359349
Yfch	P77775	YFCH_ECOLI	Epimerase family protein YfcH	22.1556	22.0456	0.163218	0.149086	0.862198	0.437573	0.991444	0.110041	0.35895
Dacc	P08506	DACC_ECOLI	D-alanyl-D-alanine carboxypeptidase DacC	21.9152	21.7398	0.176834	0.295383	0.882333	0.437646	0.991444	0.175376	0.358877
Gatz	P0C8J8	GATZ_ECOLI	D-tagatose-1,6-bisphosphate aldolase subunit GatZ	25.7715	25.8537	0.127656	0.10429	-0.863133	0.438549	0.991444	-0.0821451	0.357982
Tdcf	P0AGL2	TDCF_ECOLI	Putative reactive intermediate deaminase TdcF	20.5241	20.2323	0.372974	0.45245	0.861943	0.438976	0.991444	0.291799	0.357559
Ilvd	P05791	ILVD_ECOLI	Dihydroxy-acid dehydratase	25.0443	24.9343	0.0785951	0.194754	0.907709	0.439262	0.991444	0.110062	0.357276
Panc	P31663	PANC_ECOLI	Pantothenate synthetase	23.1326	22.8773	0.275171	0.427109	0.870279	0.441002	0.991444	0.255286	0.35556
Pspe	P23857	PSPE_ECOLI	Thiosulfate sulfurtransferase PspE	16.2263	17.9057	1.74314	2.83929	-0.873097	0.441179	0.991444	-1.67944	0.355386
Ompr	P0AA16	OMPR_ECOLI	Transcriptional regulatory protein OmpR	22.7022	22.4081	0.139596	0.53125	0.927392	0.441283	0.991444	0.294104	0.355283
Bcsg	P37659	BCSG_ECOLI	Protein BcsG homolog	18.6511	17.1799	0.209887	2.67445	0.949857	0.441391	0.991444	1.47118	0.355176
Ynca	P76112	YNCA_ECOLI	N-acyltransferase YncA	19.6719	19.5034	0.0355339	0.306328	0.946162	0.441684	0.991444	0.168459	0.354888
Ybal	P39830	YBAL_ECOLI	Inner membrane protein YbaL	18.48	19.9644	2.66359	0.946497	-0.909546	0.442136	0.991444	-1.48441	0.354444
Livf	P22731	LIVF_ECOLI	High-affinity branched-chain amino acid transport ATP-binding protein LivF	20.8113	21.076	0.118665	0.480351	-0.92662	0.44269	0.991444	-0.264706	0.3539
Rnt	P30014	RNT_ECOLI	Ribonuclease T	17.843	17.5557	0.428588	0.397216	0.851405	0.442772	0.991444	0.287244	0.35382
Rava	P31473	RAVA_ECOLI	ATPase RavA	17.6027	16.4545	0.171941	2.09669	0.945377	0.443118	0.991444	1.14824	0.353481
Gpr	Q46851	GPR_ECOLI	L-glyceraldehyde 3-phosphate reductase	19.7781	18.7501	0.234897	1.88071	0.939482	0.444073	0.991444	1.02804	0.352546
Rplw	P0ADZ0	RL23_ECOLI	50S ribosomal protein L23	21.1421	21.5794	0.168071	0.798219	-0.928601	0.444201	0.991444	-0.437331	0.35242
Uspg	P39177	USPG_ECOLI	Universal stress protein G	22.7773	23.095	0.122865	0.579995	-0.928258	0.444268	0.991444	-0.317735	0.352355
Entb	P0ADI4	ENTB_ECOLI	Isochorismatase	23.7338	23.5122	0.176631	0.397517	0.88262	0.44753	0.991444	0.221664	0.349178
Ydfg	P39831	YDFG_ECOLI	NADP-dependent 3-hydroxy acid dehydrogenase YdfG	23.2467	22.9729	0.199944	0.495131	0.888179	0.447984	0.991444	0.273819	0.348737
Dini	P0ABR1	DINI_ECOLI	DNA-damage-inducible protein I	18.3142	16.6404	0.354787	3.09771	0.929798	0.448472	0.991444	1.67378	0.348264
Ybhb	P12994	YBHB_ECOLI	UPF0098 protein YbhB	18.3779	17.9528	0.770381	0.318014	0.883616	0.449385	0.991444	0.425183	0.347382
Purn	P08179	PUR3_ECOLI	Phosphoribosylglycinamide formyltransferase	19.9362	20.447	0.876392	0.552223	-0.854052	0.449477	0.991444	-0.510771	0.347293
Flda	P61949	FLAV_ECOLI	Flavodoxin-1	20.2727	21.1526	1.2996	1.27696	-0.836476	0.449961	0.991444	-0.879902	0.346825
Yrff	P45800	IGAA_ECOLI	Putative membrane protein IgaA homolog	16.9291	15.7152	0.581621	2.24276	0.907429	0.450065	0.991444	1.21386	0.346725
Secf	P0AG93	SECF_ECOLI	Protein translocase subunit SecF	20.043	21.3557	1.93415	1.91778	-0.834782	0.4508	0.991444	-1.31274	0.346016
Kdsc	P0ABZ4	KDSC_ECOLI	3-deoxy-D-manno-octulosonate 8-phosphate phosphatase KdsC	18.5752	19.0853	0.85547	0.601665	-0.844747	0.450861	0.991444	-0.510083	0.345958
Livm	P22729	LIVM_ECOLI	High-affinity branched-chain amino acid transport system permease protein LivM	16.8749	15.5818	2.17783	1.51191	0.844755	0.451202	0.991444	1.29304	0.345629
Nage	P09323	PTW3C_ECOLI	PTS system N-acetylglucosamine-specific EIICBA component	21.4774	21.7045	0.338465	0.328563	-0.833768	0.451345	0.991444	-0.227071	0.345491
Pdxh	P0AFI7	PDXH_ECOLI	Pyridoxine/pyridoxamine 5'-phosphate oxidase	22.9581	22.7244	0.198767	0.426186	0.860629	0.456154	0.991444	0.233664	0.340889
Deod	P0ABP8	DEOD_ECOLI	Purine nucleoside phosphorylase DeoD-type	23.5681	23.3529	0.0818101	0.405238	0.901511	0.456238	0.991444	0.215177	0.340808
Rnb	P30850	RNB_ECOLI	Exoribonuclease 2	23.8238	23.9033	0.0816945	0.140895	-0.845325	0.456323	0.991444	-0.0794866	0.340728
Moea	P12281	MOEA_ECOLI	Molybdopterin molybdenumtransferase	21.8072	21.9328	0.235005	0.074802	-0.881938	0.457119	0.991444	-0.125577	0.339971
Gltx	P04805	SYE_ECOLI	Glutamate--tRNA ligase	23.866	23.7063	0.11789	0.295622	0.868933	0.457125	0.991444	0.159665	0.339965
Map	P0AE18	MAP1_ECOLI	Methionine aminopeptidase	22.9093	22.5657	0.322897	0.620776	0.850641	0.457315	0.991444	0.343651	0.339785
Cca	P06961	CCA_ECOLI	Multifunctional CCA protein	16.802	17.7737	0.897423	1.76191	-0.851194	0.457741	0.991444	-0.971717	0.33938
Glpd	P13035	GLPD_ECOLI	Aerobic glycerol-3-phosphate dehydrogenase	18.7986	17.3331	0.162828	2.78171	0.910952	0.457916	0.991444	1.46551	0.339214
Acrr	P0ACS9	ACRR_ECOLI	HTH-type transcriptional regulator AcrR	14.6008	16.5586	2.86602	2.98225	-0.819841	0.458415	0.991444	-1.9578	0.338741
Ais	P45565	AIS_ECOLI	Lipopolysaccharide core heptose(II)-phosphate phosphatase	23.0642	23.3245	0.338958	0.43011	-0.823399	0.458897	0.991444	-0.260332	0.338285
Lptc	P0ADV9	LPTC_ECOLI	Lipopolysaccharide export system protein LptC	18.9733	19.1746	0.291243	0.312302	-0.816492	0.460262	0.991444	-0.201303	0.336995
Yoji	P33941	YOJI_ECOLI	ABC transporter ATP-binding protein YojI	15.8492	14.3387	2.45183	2.05119	0.818388	0.460424	0.991444	1.51043	0.336842
Ydhf	P76187	YDHF_ECOLI	Oxidoreductase YdhF	19.8634	20.3318	0.895471	0.0700304	-0.90312	0.460791	0.991444	-0.468339	0.336496
Pyrf	P08244	PYRF_ECOLI	Orotidine 5'-phosphate decarboxylase	21.857	21.568	0.36583	0.48908	0.819742	0.461817	0.991444	0.28906	0.335531
Can	P61517	CAN_ECOLI	Carbonic anhydrase 2	23.9255	23.8001	0.144351	0.219597	0.826196	0.461881	0.991444	0.125353	0.33547
Msra	P0A744	MSRA_ECOLI	Peptide methionine sulfoxide reductase MsrA	20.9729	21.5151	0.687785	0.917342	-0.819142	0.462067	0.991444	-0.542237	0.335295
Glnk	P0AC55	GLNK_ECOLI	Nitrogen regulatory protein P-II 2	24.0347	24.3504	0.44778	0.504629	-0.81051	0.463715	0.991444	-0.315703	0.333749
Dnax	P06710	DPO3X_ECOLI	DNA polymerase III subunit tau	20.5709	20.6524	0.12723	0.119854	-0.807888	0.46461	0.991444	-0.0815293	0.332912
Trmh	P0AGJ2	TRMH_ECOLI	tRNA (guanosine(18)-2'-O)-methyltransferase	17.8453	17.0418	0.306968	1.54643	0.882635	0.46463	0.991444	0.80342	0.332893
Hisg	P60757	HIS1_ECOLI	ATP phosphoribosyltransferase	23.9742	24.0818	0.0694379	0.205083	-0.861091	0.465095	0.991444	-0.107643	0.332459
Smta	P36566	SMTA_ECOLI	Protein SmtA	18.6695	16.9432	0.10001	3.34049	0.894669	0.465229	0.991444	1.72626	0.332333
Ydcl	P64451	YDCL_ECOLI	Uncharacterized lipoprotein YdcL	21.6893	21.0464	0.273758	1.23838	0.877994	0.46537	0.991444	0.642902	0.332202
Purb	P0AB89	PUR8_ECOLI	Adenylosuccinate lyase	24.1293	24.0664	0.0746734	0.111062	0.814283	0.467213	0.991444	0.0629176	0.330485
Djla	P31680	DJLA_ECOLI	DnaJ-like protein DjlA	20.4667	20.0217	0.122705	0.867636	0.879566	0.468779	0.991444	0.444985	0.329032
Pgi	P0A6T1	G6PI_ECOLI	Glucose-6-phosphate isomerase	23.9793	24.0905	0.169588	0.171021	-0.799429	0.468826	0.991444	-0.111164	0.328989
Menb	P0ABU0	MENB_ECOLI	1,4-Dihydroxy-2-naphthoyl-CoA synthase	21.4587	21.3013	0.221351	0.260112	0.798379	0.470437	0.991444	0.157434	0.327499
Ucpa	P37440	UCPA_ECOLI	Oxidoreductase UcpA	18.4307	18.9902	0.699549	0.979876	-0.804803	0.470471	0.991444	-0.559425	0.327467
Tils	P52097	TILS_ECOLI	tRNA(Ile)-lysidine synthase	20.8907	20.5472	0.0894372	0.673891	0.875417	0.470949	0.991444	0.343586	0.327026
Ilva	P04968	ILVA_ECOLI	L-threonine dehydratase biosynthetic IlvA	24.5563	24.4807	0.04822	0.146406	0.849094	0.471267	0.991444	0.0755642	0.326733
Ybhg	P75777	YBHG_ECOLI	UPF0194 membrane protein YbhG	19.2517	19.1001	0.283354	0.150541	0.818832	0.472051	0.991444	0.151688	0.326011
Bira	P06709	BIRA_ECOLI	Bifunctional ligase/repressor BirA	15.5574	14.1416	2.79082	0.0315968	0.878637	0.472248	0.991444	1.41582	0.325829
Pare	P20083	PARE_ECOLI	DNA topoisomerase 4 subunit B	22.1774	21.5497	0.0138301	1.23813	0.878096	0.472483	0.991444	0.627732	0.325613
Sstt	P0AGE4	SSTT_ECOLI	Serine/threonine transporter SstT	16.1297	14.7265	2.76884	0.0315968	0.87767	0.472668	0.991444	1.40313	0.325444
Nusb	P0A780	NUSB_ECOLI	N utilization substance protein B	21.4966	21.2265	0.218528	0.518523	0.831226	0.473183	0.991444	0.27004	0.324971
Tesa	P0ADA1	TESA_ECOLI	Acyl-CoA thioesterase I	20.7329	19.2665	0.146909	2.90668	0.872689	0.474451	0.991444	1.46639	0.323809
Hupa	P0ACF0	DBHA_ECOLI	DNA-binding protein HU-alpha	26.1581	25.8986	0.267254	0.485118	0.811466	0.474552	0.991444	0.259485	0.323716
Ymdb	P0A8D6	YMDB_ECOLI	O-acetyl-ADP-ribose deacetylase	14.7026	14.922	0.308389	0.369212	-0.790034	0.475018	0.991444	-0.219425	0.32329
Acnb	P36683	ACON2_ECOLI	Aconitate hydratase 2	26.8822	26.9763	0.0510502	0.185556	-0.847363	0.475755	0.991444	-0.0941517	0.322617
Crea	P0AE91	CREA_ECOLI	Protein CreA	20.4458	20.6351	0.196188	0.356669	-0.805489	0.477577	0.991444	-0.189306	0.320957
Gatb	P37188	PTKB_ECOLI	Galactitol-specific phosphotransferase enzyme IIB component	20.4643	20.6647	0.104966	0.398578	-0.841889	0.479028	0.991444	-0.20034	0.319639
Daca	P0AEB2	DACA_ECOLI	D-alanyl-D-alanine carboxypeptidase DacA	23.7281	23.6638	0.0439811	0.126885	0.829445	0.479241	0.991444	0.0643092	0.319446
Serc	P23721	SERC_ECOLI	Phosphoserine aminotransferase	25.8757	25.7667	0.201416	0.126475	0.793474	0.479665	0.991444	0.108954	0.319062
Poxb	P07003	POXB_ECOLI	Pyruvate dehydrogenase [ubiquinone]	19.7444	18.8311	0.987775	1.72031	0.797408	0.480316	0.991444	0.913276	0.318473
Skp	P0AEU7	SKP_ECOLI	Chaperone protein Skp	24.1285	23.7674	0.292639	0.707356	0.817051	0.480525	0.991444	0.361105	0.318284
Yfay	P77808	CINAL_ECOLI	NMN amidohydrolase-like protein YfaY	19.0885	18.4016	0.463676	1.3617	0.827051	0.480794	0.991444	0.686873	0.318041
Htrb	P0ACV0	HTRB_ECOLI	Lipid A biosynthesis lauroyl acyltransferase	18.2533	17.798	0.775451	0.652211	0.778237	0.48109	0.991444	0.455275	0.317774
Yiaf	P0ADK0	YIAF_ECOLI	Uncharacterized protein YiaF	22.0906	21.6405	0.404316	0.876213	0.807849	0.481821	0.991444	0.450086	0.317114
Fbaa	P0AB71	ALF_ECOLI	Fructose-bisphosphate aldolase class 2	25.6795	25.4447	0.168504	0.465462	0.821416	0.481986	0.991444	0.234763	0.316965
Ssb	P0AGE0	SSB_ECOLI	Single-stranded DNA-binding protein	22.8013	22.5884	0.219737	0.407196	0.796917	0.482462	0.991444	0.212889	0.316537
Yahj	P77554	YAHJ_ECOLI	Uncharacterized protein YahJ	15.8934	14.4902	2.10856	2.32824	0.773703	0.482685	0.991444	1.40314	0.316336
Rple	P62399	RL5_ECOLI	50S ribosomal protein L5	25.771	25.8761	0.0684423	0.210024	-0.824317	0.483086	0.991444	-0.105128	0.315976
Slyd	P0A9K9	SLYD_ECOLI	FKBP-type peptidyl-prolyl cis-trans isomerase SlyD	23.3275	23.8051	0.573768	0.885701	-0.783926	0.483689	0.991444	-0.477632	0.315434
Psts	P0AG82	PSTS_ECOLI	Phosphate-binding protein PstS	19.4663	18.8766	1.11038	0.671855	0.787001	0.484042	0.991444	0.589696	0.315117
Cusc	P77211	CUSC_ECOLI	Cation efflux system protein CusC	20.5414	21.2722	1.43104	0.671929	-0.800672	0.484839	0.991444	-0.730819	0.314403
Yoaf	P64493	YOAF_ECOLI	Uncharacterized protein YoaF	17.9633	15.4687	3.90181	4.06115	0.767217	0.485796	0.991444	2.49462	0.313546
Rpsf	P02358	RS6_ECOLI	30S ribosomal protein S6	24.2561	24.5978	0.120614	0.695817	-0.838099	0.485829	0.991444	-0.341711	0.313517
Yhbs	P63417	YHBS_ECOLI	Uncharacterized N-acetyltransferase YhbS	21.2781	20.693	0.372774	1.17864	0.81982	0.48586	0.991444	0.585113	0.313489
Ribb	P0A7J0	RIBB_ECOLI	3,4-dihydroxy-2-butanone 4-phosphate synthase	18.4893	18.9173	0.0608026	0.874288	-0.845904	0.485939	0.991444	-0.428019	0.313419
Phrb	P00914	PHR_ECOLI	Deoxyribodipyrimidine photo-lyase	14.2143	13.1416	2.19694	0.0315968	0.845646	0.486759	0.991444	1.07273	0.312686
Yjjv	P39408	YJJV_ECOLI	Uncharacterized deoxyribonuclease YjjV	14.2131	13.1416	2.1949	0.0315968	0.845502	0.486824	0.991444	1.07155	0.312628
Nrde	P39452	RIR3_ECOLI	Ribonucleoside-diphosphate reductase 2 subunit alpha	19.4853	19.9455	0.853938	0.571223	-0.775754	0.487065	0.991444	-0.460144	0.312413
Yqef	Q46939	YQEF_ECOLI	Probable acetyl-CoA acetyltransferase	17.7468	19.5561	3.71443	0.231639	-0.84204	0.487815	0.991444	-1.80929	0.311745
Glmu	P0ACC7	GLMU_ECOLI	Bifunctional protein GlmU	21.6751	21.9304	0.499734	0.252494	-0.789705	0.488098	0.991444	-0.255278	0.311493
Bisc	P20099	BISC_ECOLI	Biotin sulfoxide reductase	18.4257	18.8758	0.354601	0.903674	-0.803109	0.488737	0.991444	-0.450116	0.310924
Edd	P0ADF6	EDD_ECOLI	Phosphogluconate dehydratase	22.0238	21.8857	0.0316522	0.284242	0.836254	0.489164	0.991444	0.138084	0.310546
Ftsk	P46889	FTSK_ECOLI	DNA translocase FtsK	19.5406	17.95	0.593548	3.26781	0.829477	0.489373	0.991444	1.59056	0.31036
Lold	P75957	LOLD_ECOLI	Lipoprotein-releasing system ATP-binding protein LolD	20.6677	20.5108	0.0596313	0.322516	0.828616	0.489608	0.991444	0.156907	0.310151
Bglj	P39404	BGLJ_ECOLI	Transcriptional activator protein BglJ	16.8704	14.8543	3.47433	2.99697	0.761056	0.489874	0.991444	2.01609	0.309915
Rsmf	P76273	RSMF_ECOLI	Ribosomal RNA small subunit methyltransferase F	18.4304	18.9742	0.549541	1.06876	-0.783771	0.490562	0.991444	-0.543814	0.309306
Pyka	P21599	KPYK2_ECOLI	Pyruvate kinase II	24.4373	24.3844	0.107923	0.0371844	0.802124	0.492437	0.991444	0.0528632	0.307649
Prop	P0C0L7	PROP_ECOLI	Proline/betaine transporter	19.5643	19.0816	0.518188	0.945725	0.775297	0.492971	0.991444	0.482704	0.307179
Putp	P07117	PUTP_ECOLI	Sodium/proline symporter	19.8722	19.3557	0.193653	1.0714	0.821596	0.493051	0.991444	0.516452	0.307108
Gyrb	P0AES6	GYRB_ECOLI	DNA gyrase subunit B	24.3258	24.4173	0.140071	0.157218	-0.752239	0.494271	0.991444	-0.0914495	0.306035
Yceg	P28306	YCEG_ECOLI	UPF0755 protein YceG	18.3683	18.4524	0.152746	0.118329	-0.75379	0.495365	0.991444	-0.0840885	0.305075
Accb	P0ABD8	BCCP_ECOLI	Biotin carboxyl carrier protein of acetyl-CoA carboxylase	22.3151	21.781	0.31596	1.10884	0.802345	0.496214	0.991444	0.534098	0.304331
Tig	P0A850	TIG_ECOLI	Trigger factor	26.5681	26.5958	0.00794617	0.0579982	-0.817672	0.496761	0.991444	-0.0276358	0.303853
Ybbn	P77395	YBBN_ECOLI	Uncharacterized protein YbbN	22.3939	22.8103	0.558559	0.777562	-0.753311	0.497156	0.991444	-0.416391	0.303507
Hslo	P0A6Y5	HSLO_ECOLI	33 kDa chaperonin	22.2466	22.5776	0.366709	0.653687	-0.764878	0.497644	0.991444	-0.330991	0.303081
Bcsc	P37650	BCSC_ECOLI	Cellulose synthase operon protein C	18.7065	18.3024	0.349036	0.827758	0.779194	0.498614	0.991444	0.404133	0.302235
Ybab	P0A8B5	YBAB_ECOLI	Nucleoid-associated protein YbaB	21.559	21.9469	0.36034	0.790802	-0.773026	0.499555	0.991444	-0.387854	0.301417
Yeiu	P76445	YEIU_ECOLI	Inner membrane protein YeiU	19.168	17.431	0.28568	3.68671	0.813649	0.500432	0.991444	1.73706	0.300655
Arnd	P76472	ARND_ECOLI	Probable 4-deoxy-4-formamido-L-arabinose-phosphoundecaprenol deformylase ArnD	22.1624	21.9883	0.170616	0.353955	0.767279	0.50086	0.991444	0.174064	0.300284
Atpg	P0ABA6	ATPG_ECOLI	ATP synthase gamma chain	24.1879	24.0537	0.174394	0.258706	0.745336	0.502901	0.991444	0.134258	0.298517
Gstb	P0ACA7	GSTB_ECOLI	Glutathione S-transferase GstB	23.032	22.7641	0.302729	0.536185	0.753663	0.503297	0.991444	0.267926	0.298175
Rmla2	P61887	RMLA2_ECOLI	Glucose-1-phosphate thymidylyltransferase 2	18.2557	18.7298	1.01401	0.0953055	-0.806233	0.503463	0.991444	-0.47408	0.298033
Tusb	P45530	TUSB_ECOLI	Protein TusB	17.6814	17.2478	0.635769	0.796306	0.737072	0.503851	0.991444	0.433622	0.297698
Speg	P0A951	ATDA_ECOLI	Spermidine N(1)-acetyltransferase	17.2841	17.0462	0.378266	0.416279	0.732516	0.504812	0.991444	0.237879	0.29687
Lptb	P0A9V1	LPTB_ECOLI	Lipopolysaccharide export system ATP-binding protein LptB	22.1613	22.0263	0.140368	0.276466	0.754057	0.506162	0.991444	0.134986	0.29571
Tonb	P02929	TONB_ECOLI	Protein TonB	15.7863	16.8269	1.66705	1.84302	-0.725266	0.508823	0.991444	-1.0406	0.293434
Yegd	P36928	YEGD_ECOLI	Uncharacterized chaperone protein YegD	14.6533	16.2307	2.60487	2.7286	-0.724248	0.509087	0.991444	-1.57739	0.293208
Krt10	P13645	K1C10_HUMAN	Keratin, type I cytoskeletal 10	17.7102	18.594	0.817354	1.85629	-0.754757	0.509814	0.991444	-0.883836	0.292589
Gnsa	P0AC92	GNSA_ECOLI	Protein GnsA	15.853	14.5272	2.08334	2.3923	0.723849	0.509936	0.991444	1.32575	0.292484
Rcsf	P69411	RCSF_ECOLI	Outer membrane lipoprotein RcsF	19.8881	19.6183	0.41888	0.491256	0.723775	0.510206	0.991444	0.269776	0.292255
Mlaa	P76506	MLAA_ECOLI	Probable phospholipid-binding lipoprotein MlaA	20.4177	20.9571	1.12588	0.538256	-0.748608	0.510705	0.991444	-0.539367	0.29183
Cmoa	P76290	CMOA_ECOLI	tRNA (cmo5U34)-methyltransferase	22.5299	21.5725	0.13286	2.08979	0.791919	0.510839	0.991444	0.957413	0.291716
Hflk	P0ABC7	HFLK_ECOLI	Modulator of FtsH protease HflK	23.5312	23.4749	0.0690797	0.11376	0.732148	0.51266	0.991444	0.0562586	0.290171
Ybgk	P75745	YBGK_ECOLI	Uncharacterized protein YbgK	19.5675	20.0796	1.12276	0.173053	-0.780802	0.513432	0.991444	-0.512114	0.289517
Ycgl	P0AB43	YCGL_ECOLI	Protein YcgL	19.3604	18.946	0.456884	0.860575	0.736713	0.513965	0.991444	0.414426	0.289067
Yceb	P0AB26	YCEB_ECOLI	Uncharacterized lipoprotein YceB	19.8457	19.5655	0.567754	0.347814	0.728724	0.514262	0.991444	0.280131	0.288816
Ligt	P37025	LIGT_ECOLI	2'-5'-RNA ligase	14.4678	15.9532	2.63572	2.45756	-0.713919	0.514904	0.991444	-1.48538	0.288274
Aldb	P37685	ALDB_ECOLI	Aldehyde dehydrogenase B	14.9189	14.7265	0.425741	0.0315968	0.7805	0.516035	0.991444	0.192376	0.287321
Pcka	P22259	PCKA_ECOLI	Phosphoenolpyruvate carboxykinase [ATP]	24.0264	23.979	0.0768488	0.0860734	0.711775	0.516386	0.991444	0.0474179	0.287026
Fes	P13039	FES_ECOLI	Enterochelin esterase	19.658	19.3184	0.203969	0.745991	0.76051	0.51729	0.991444	0.339573	0.286266
Ppid	P0ADY1	PPID_ECOLI	Peptidyl-prolyl cis-trans isomerase D	23.7498	23.6792	0.155768	0.0377373	0.763004	0.517823	0.991444	0.070604	0.285819
Yiad	P37665	YIAD_ECOLI	Probable lipoprotein YiaD	22.1896	21.9263	0.421208	0.486894	0.708314	0.518605	0.991444	0.26328	0.285164
Ybjp	P75818	YBJP_ECOLI	Uncharacterized lipoprotein YbjP	20.5413	20.2704	0.259211	0.581961	0.736753	0.518809	0.991444	0.27099	0.284992
Yegu	P76418	YEGU_ECOLI	Uncharacterized protein YegU	20.1049	19.5156	0.288291	1.30917	0.761384	0.519792	0.991444	0.589282	0.28417
Ycbz	P75867	LONH_ECOLI	Putative Lon protease homolog	19.2822	19.0627	0.452937	0.276993	0.716179	0.521086	0.991444	0.219528	0.283091
Pota	P69874	POTA_ECOLI	Spermidine/putrescine import ATP-binding protein PotA	21.0991	20.9614	0.157907	0.290498	0.721325	0.521493	0.991444	0.137698	0.282752
Ubib	P0A6A0	UBIB_ECOLI	Probable protein kinase UbiB	18.9332	19.3145	0.656253	0.6743	-0.701815	0.521508	0.991444	-0.381258	0.282739
Zwf	P0AC53	G6PD_ECOLI	Glucose-6-phosphate 1-dehydrogenase	24.03	23.9336	0.0934942	0.208707	0.730211	0.522076	0.991444	0.0964135	0.282267
Qora	P28304	QOR1_ECOLI	Quinone oxidoreductase 1	20.3507	20.7731	0.698005	0.776619	-0.70077	0.522478	0.991444	-0.422472	0.281932
Pyri	P0A7F3	PYRI_ECOLI	Aspartate carbamoyltransferase regulatory chain	17.9783	16.6139	1.03381	3.01522	0.741392	0.522713	0.991444	1.3644	0.281736
Nhab	P0AFA7	NHAB_ECOLI	Na(+)/H(+) antiporter NhaB	19.2524	19.4595	0.0713349	0.465682	-0.761276	0.522898	0.991444	-0.207065	0.281583
Rplu	P0AG48	RL21_ECOLI	50S ribosomal protein L21	23.6137	23.7967	0.293331	0.344423	-0.700915	0.522906	0.991444	-0.183076	0.281577
Ymba	P0AB10	YMBA_ECOLI	Uncharacterized lipoprotein YmbA	19.8164	18.8657	0.198359	2.14592	0.764122	0.52347	0.991444	0.950743	0.281108
Meti	P31547	METI_ECOLI	D-methionine transport system permease protein MetI	14.4858	15.7644	2.15676	2.32527	-0.698271	0.523676	0.991444	-1.27858	0.280937
Yqha	P67244	YQHA_ECOLI	UPF0114 protein YqhA	16.9913	17.5992	1.02892	1.11393	-0.694347	0.525909	0.991444	-0.607904	0.27909
Yaeh	P62768	YAEH_ECOLI	UPF0325 protein YaeH	22.8894	22.7016	0.372571	0.279904	0.69807	0.526375	0.991444	0.187812	0.278705
Mura	P0A749	MURA_ECOLI	UDP-N-acetylglucosamine 1-carboxyvinyltransferase	23.217	23.2931	0.0785274	0.166397	-0.717072	0.527625	0.991444	-0.0761747	0.277675
Ydgh	P76177	YDGH_ECOLI	Protein YdgH	23.6528	23.4025	0.212439	0.557682	0.726481	0.52806	0.991444	0.250307	0.277317
Baer	P69228	BAER_ECOLI	Transcriptional regulatory protein BaeR	19.9645	19.417	0.700478	1.15229	0.703254	0.528294	0.991444	0.547521	0.277124
Yqab	P77475	YQAB_ECOLI	Fructose-1-phosphate phosphatase YqaB	19.9757	19.6591	0.128986	0.721472	0.748068	0.528322	0.991444	0.316543	0.277102
Yejl	P0AD24	YEJL_ECOLI	UPF0352 protein YejL	15.8531	16.7612	1.23716	1.87751	-0.69953	0.528349	0.991444	-0.908095	0.277079
Ppic	P0A9L5	PPIC_ECOLI	Peptidyl-prolyl cis-trans isomerase C	19.1842	19.3878	0.170844	0.455244	-0.725137	0.529101	0.991444	-0.203571	0.276461
Dgka	P0ABN1	KDGL_ECOLI	Diacylglycerol kinase	21.1988	21.2919	0.207328	0.0833479	-0.721675	0.529294	0.991444	-0.0931042	0.276303
Fucu	P0AEN8	FUCM_ECOLI	L-fucose mutarotase	20.5228	19.7904	0.694937	1.62314	0.718398	0.529459	0.991444	0.732334	0.276168
Cydc	P23886	CYDC_ECOLI	ATP-binding/permease protein CydC	19.8956	19.0825	1.37756	1.51551	0.687632	0.529804	0.991444	0.813077	0.275885
Yicn	P0ADL3	YICN_ECOLI	Uncharacterized protein YicN	13.6478	14.1457	0.897427	0.879505	-0.686414	0.530188	0.991444	-0.49797	0.27557
Cira	P17315	CIRA_ECOLI	Colicin I receptor	23.5681	23.934	0.668195	0.637569	-0.686286	0.530324	0.991444	-0.365943	0.275459
Glob	P0AC84	GLO2_ECOLI	Hydroxyacylglutathione hydrolase	20.8076	20.2645	0.0237454	1.2526	0.75076	0.53106	0.991444	0.543038	0.274857
Tufa;tufb	P0CE47;P0CE48	EFTU1_ECOLI;EFTU2_ECOLI	Elongation factor Tu 1	29.4082	29.4945	0.0655309	0.196466	-0.721826	0.533326	0.991444	-0.086311	0.273007
Rsmj	P68567	RSMJ_ECOLI	Ribosomal RNA small subunit methyltransferase J	16.5116	14.8527	3.01399	2.95594	0.680654	0.533464	0.991444	1.65898	0.272895
Yheo	P64624	YHEO_ECOLI	Uncharacterized protein YheO	19.3308	19.4962	0.168207	0.3684	-0.707574	0.53356	0.991444	-0.165444	0.272817
Arog	P0AB91	AROG_ECOLI	Phospho-2-dehydro-3-deoxyheptonate aldolase, Phe-sensitive	24.8758	24.8032	0.0166134	0.168394	0.742662	0.533782	0.991444	0.0725538	0.272636
Feoa	P0AEL3	FEOA_ECOLI	Ferrous iron transport protein A	20.3206	20.0692	0.520393	0.361516	0.687162	0.534042	0.991444	0.251387	0.272424
Gcvt	P27248	GCST_ECOLI	Aminomethyltransferase	22.572	22.3682	0.210139	0.453667	0.705757	0.53416	0.991444	0.203723	0.272329
Uxub	P39160	UXUB_ECOLI	D-mannonate oxidoreductase	19.9014	18.7531	0.787437	2.63175	0.724049	0.534191	0.991444	1.14834	0.272303
Quea	P0A7F9	QUEA_ECOLI	S-adenosylmethionine:tRNA ribosyltransferase-isomerase	21.4682	21.2512	0.155833	0.496794	0.721957	0.534429	0.991444	0.217023	0.27211
Cusr	P0ACZ8	CUSR_ECOLI	Transcriptional regulatory protein CusR	18.0111	17.3065	0.823947	1.5434	0.697534	0.534847	0.991444	0.704587	0.271771
Phop	P23836	PHOP_ECOLI	Transcriptional regulatory protein PhoP	23.7752	23.6224	0.0752643	0.353688	0.731668	0.53494	0.991444	0.152753	0.271695
Ybix	P75779	YBIX_ECOLI	PKHD-type hydroxylase YbiX	18.3727	16.9103	2.77393	2.49814	0.678556	0.53503	0.991444	1.46246	0.271622
Rdgc	P36767	RDGC_ECOLI	Recombination-associated protein RdgC	19.8498	20.2012	0.346879	0.789407	-0.705778	0.535501	0.991444	-0.351354	0.27124
Udk	P0A8F4	URK_ECOLI	Uridine kinase	21.4822	21.7028	0.293952	0.470389	-0.688841	0.535557	0.991444	-0.220599	0.271194
Yeiq	P33029	YEIQ_ECOLI	Uncharacterized oxidoreductase YeiQ	15.1177	15.2768	0.308389	0.264795	-0.678032	0.535747	0.991444	-0.159119	0.27104
Mgsa	P0A731	MGSA_ECOLI	Methylglyoxal synthase	21.2729	21.0607	0.23639	0.471134	0.697075	0.536745	0.991444	0.21214	0.270232
Acps	P24224	ACPS_ECOLI	Holo-[acyl-carrier-protein] synthase	14.3092	15.5432	2.36128	2.10615	-0.675485	0.536856	0.991444	-1.23397	0.270142
Rlud	P33643	RLUD_ECOLI	Ribosomal large subunit pseudouridine synthase D	19.7489	20.0283	0.173665	0.647336	-0.721986	0.536987	0.991444	-0.279377	0.270036
Ybay	P77717	YBAY_ECOLI	Uncharacterized lipoprotein YbaY	16.8923	18.0225	2.65521	0.180537	-0.735588	0.53794	0.991444	-1.13025	0.269266
Ispf	P62617	ISPF_ECOLI	2-C-methyl-D-erythritol 2,4-cyclodiphosphate synthase	19.3024	19.6283	0.551735	0.633623	-0.67202	0.539045	0.991444	-0.325979	0.268375
Ftsh	P0AAI3	FTSH_ECOLI	ATP-dependent zinc metalloprotease FtsH	24.6535	24.5661	0.118463	0.188592	0.679589	0.540593	0.991444	0.0873831	0.267129
Nuoj	P0AFE0	NUOJ_ECOLI	NADH-quinone oxidoreductase subunit J	18.8441	18.6153	0.214183	0.525503	0.698352	0.541305	0.991444	0.228802	0.266558
Yobd	P67601	YOBD_ECOLI	UPF0266 membrane protein YobD	16.2429	14.8	2.4193	2.85001	0.668522	0.541308	0.991444	1.44291	0.266555
Atpb	P0AB98	ATP6_ECOLI	ATP synthase subunit a	21.2278	21.0134	0.377324	0.409403	0.666935	0.541543	0.991444	0.214384	0.266367
Accc	P24182	ACCC_ECOLI	Biotin carboxylase	23.8322	23.7531	0.160484	0.129031	0.66513	0.543931	0.991444	0.0790769	0.264456
Trxc	P0AGG4	THIO2_ECOLI	Thioredoxin-2	16.0584	17.7221	3.03599	3.12649	-0.661253	0.544625	0.991444	-1.66377	0.263902
Iscu	P0ACD4	ISCU_ECOLI	Iron-sulfur cluster assembly scaffold protein IscU	20.3775	19.8219	0.318375	1.31848	0.709479	0.544822	0.991444	0.555595	0.263745
Betb	P17445	BETB_ECOLI	NAD/NADP-dependent betaine aldehyde dehydrogenase	20.6483	20.429	0.0879744	0.523704	0.715091	0.545288	0.991444	0.219245	0.263374
Leus	P07813	SYL_ECOLI	Leucine--tRNA ligase	24.5352	24.6463	0.0939963	0.2602	-0.695123	0.54571	0.991444	-0.111031	0.263038
Meth	P13009	METH_ECOLI	Methionine synthase	24.4275	24.4925	0.0592193	0.151945	-0.690609	0.546478	0.991444	-0.0650228	0.262427
Dps	P0ABT2	DPS_ECOLI	DNA protection during starvation protein	23.6141	23.8502	0.336117	0.512347	-0.66728	0.546515	0.991444	-0.236068	0.262398
Nanr	P0A8W0	NANR_ECOLI	Transcriptional regulator NanR	19.6224	19.2061	0.530019	0.930793	0.673131	0.546644	0.991444	0.416271	0.262296
Wzzb	P76372	WZZB_ECOLI	Chain length determinant protein	21.2848	21.3636	0.18	0.0900687	-0.678286	0.547096	0.991444	-0.0788217	0.261936
Rutc	P0AFQ5	RUTC_ECOLI	Putative aminoacrylate peracid reductase RutC	19.796	20.1484	0.708446	0.598915	-0.657876	0.547488	0.991444	-0.352357	0.261625
Mobb	P32125	MOBB_ECOLI	Molybdopterin-guanine dinucleotide biosynthesis adapter protein	17.6118	17.2581	0.368743	0.823777	0.678659	0.549691	0.991444	0.353637	0.259881
Bamd	P0AC02	BAMD_ECOLI	Outer membrane protein assembly factor BamD	23.2266	23.0338	0.252368	0.433233	0.666104	0.550014	0.991444	0.192818	0.259626
Ydch	P0ACW6	YDCH_ECOLI	Uncharacterized protein YdcH	18.4988	19.1185	0.897782	1.35924	-0.6589	0.551131	0.991444	-0.619687	0.258745
Eco	P23827	ECOT_ECOLI	Ecotin	19.3496	18.6677	1.07054	1.45128	0.654962	0.551164	0.991444	0.681944	0.258719
Argd	P18335	ARGD_ECOLI	Acetylornithine/succinyldiaminopimelate aminotransferase	23.7715	23.7394	0.0387146	0.0736234	0.668496	0.551255	0.991444	0.0321046	0.258647
Raia	P0AD49	RAIA_ECOLI	Ribosome-associated inhibitor A	22.249	22.6924	0.215017	1.08422	-0.694864	0.554407	0.991444	-0.443437	0.256171
Cysp	P16700	CYSP_ECOLI	Thiosulfate-binding protein	24.2278	24.4877	0.477446	0.510685	-0.644066	0.554754	0.991444	-0.259965	0.255899
Uxac	P0A8G3	UXAC_ECOLI	Uronate isomerase	20.075	20.2552	0.286985	0.386606	-0.648224	0.554947	0.991444	-0.180196	0.255748
Yfgm	P76576	YFGM_ECOLI	UPF0070 protein YfgM	21.6672	21.5077	0.0713558	0.390915	0.695023	0.554989	0.991444	0.159455	0.255716
Pept	P29745	PEPT_ECOLI	Peptidase T	19.2728	19.7576	1.12872	0.576289	-0.662502	0.555346	0.991444	-0.484749	0.255437
Ratb	P52119	RATB_ECOLI	UPF0125 protein RatB	17.8187	16.8547	0.177637	2.37747	0.700316	0.555534	0.991444	0.963956	0.255289
Rnr	P21499	RNR_ECOLI	Ribonuclease R	23.3813	23.4588	0.0415776	0.189828	-0.690634	0.555678	0.991444	-0.077486	0.255177
Grca	P68066	GRCA_ECOLI	Autonomous glycyl radical cofactor	15.9246	15.4635	1.1392	0.0315968	0.700812	0.555883	0.991444	0.461113	0.255017
Arop	P15993	AROP_ECOLI	Aromatic amino acid transport protein AroP	20.3834	20.1521	0.296545	0.534896	0.655031	0.557489	0.991444	0.231296	0.253764
Trub	P60340	TRUB_ECOLI	tRNA pseudouridine synthase B	19.9399	19.6114	0.0979711	0.814413	0.693551	0.557921	0.991444	0.32846	0.253427
Hyci	P0AEV9	HYCI_ECOLI	Hydrogenase 3 maturation protease	16.1124	14.6794	2.84336	2.65591	0.637902	0.558377	0.991444	1.43296	0.253072
Glrr	P0AFU4	GLRR_ECOLI	Transcriptional regulatory protein GlrR	22.9288	23.1611	0.199073	0.566896	-0.669699	0.559923	0.991444	-0.232313	0.251872
Gltk	P0AER5	GLTK_ECOLI	Glutamate/aspartate transport system permease protein GltK	16.7474	18.1038	3.38939	0.221574	-0.69169	0.560109	0.991444	-1.35643	0.251727
Ahpc	P0AE08	AHPC_ECOLI	Alkyl hydroperoxide reductase subunit C	25.5415	25.3289	0.205289	0.518201	0.660518	0.562455	0.991444	0.212558	0.249912
Hldd	P67910	HLDD_ECOLI	ADP-L-glycero-D-manno-heptose-6-epimerase	23.5332	23.3635	0.203975	0.403801	0.649716	0.562789	0.991444	0.169699	0.249654
Pdxb	P05459	PDXB_ECOLI	Erythronate-4-phosphate dehydrogenase	23.5987	23.4826	0.145015	0.274807	0.647165	0.56316	0.991444	0.116099	0.249369
Rute	P75894	RUTE_ECOLI	Probable malonic semialdehyde reductase RutE	21.9087	22.1583	0.629404	0.0536526	-0.684621	0.563388	0.991444	-0.249684	0.249193
Gsk	P0AEW6	INGK_ECOLI	Inosine-guanosine kinase	19.3542	19.0728	0.294973	0.684433	0.653933	0.564216	0.991444	0.281383	0.248555
Potf	P31133	POTF_ECOLI	Putrescine-binding periplasmic protein	22.0353	22.33	0.620047	0.524636	-0.628396	0.56472	0.991444	-0.294677	0.248167
Rpsi	P0A7X3	RS9_ECOLI	30S ribosomal protein S9	25.2492	25.2852	0.0741835	0.0661125	-0.627144	0.565004	0.991444	-0.0359795	0.247948
Ycao	P75838	YCAO_ECOLI	Ribosomal protein S12 methylthiotransferase accessory factor YcaO	22.6996	22.7581	0.0918361	0.131828	-0.63062	0.56637	0.991444	-0.0584956	0.2469
Yail	P51024	YAIL_ECOLI	Uncharacterized protein YaiL	14.6717	16.089	2.98877	2.54443	-0.625378	0.566445	0.991444	-1.41723	0.246843
Malt	P06993	MALT_ECOLI	HTH-type transcriptional regulator MalT	21.6859	20.3716	0.329737	3.342	0.677872	0.566595	0.991444	1.31431	0.246727
Rfbd	P37760	RMLD_ECOLI	dTDP-4-dehydrorhamnose reductase	18.3964	17.8393	1.40138	0.376045	0.665027	0.56684	0.991444	0.557102	0.246539
Gor	P06715	GSHR_ECOLI	Glutathione reductase	22.6486	22.5611	0.0820478	0.217143	0.653461	0.567335	0.991444	0.0875758	0.246161
Gltj	P0AER3	GLTJ_ECOLI	Glutamate/aspartate transport system permease protein GltJ	18.2815	18.6643	0.652564	0.835638	-0.625364	0.567511	0.991444	-0.382808	0.246026
Hint	P0ACE7	HINT_ECOLI	HIT-like protein HinT	19.5412	19.9462	0.621189	0.927273	-0.628426	0.568435	0.991444	-0.404951	0.245319
Manb	P24175	MANB_ECOLI	Phosphomannomutase	19.0975	18.6648	0.75869	0.934792	0.622475	0.568701	0.991444	0.432676	0.245116
Ygin	P0ADU2	YGIN_ECOLI	Probable quinol monooxygenase YgiN	21.6967	21.4115	0.336282	0.694213	0.640493	0.569013	0.991444	0.285245	0.244878
Tmk	P0A720	KTHY_ECOLI	Thymidylate kinase	18.6254	17.6365	0.11702	2.54441	0.672462	0.570318	0.991444	0.988901	0.243883
Ycia	P0A8Z0	YCIA_ECOLI	Acyl-CoA thioester hydrolase YciA	17.8066	17.5726	0.307837	0.56202	0.63247	0.570645	0.991444	0.233994	0.243634
Taub	Q47538	TAUB_ECOLI	Taurine import ATP-binding protein TauB	19.5192	19.1084	0.312977	1.04792	0.6506	0.573106	0.991444	0.410804	0.241765
Msbb	P24205	MSBB_ECOLI	Lipid A biosynthesis (KDO)2-(lauroyl)-lipid IVA acyltransferase	21.1596	21.2586	0.2524	0.076804	-0.649854	0.573224	0.991444	-0.098986	0.241676
Gabd	P25526	GABD_ECOLI	Succinate-semialdehyde dehydrogenase [NADP(+)] GabD	20.7582	20.3708	0.31288	0.986505	0.648336	0.573387	0.991444	0.387393	0.241552
Serb	P0AGB0	SERB_ECOLI	Phosphoserine phosphatase	21.4075	21.714	0.747842	0.392802	-0.628346	0.574013	0.991444	-0.306446	0.241078
Trxb	P0A9P4	TRXB_ECOLI	Thioredoxin reductase	23.2049	23.2695	0.154784	0.0912282	-0.622051	0.574957	0.991444	-0.0645261	0.240365
Dld	P06149	DLD_ECOLI	D-lactate dehydrogenase	22.5832	22.6305	0.0750287	0.11015	-0.615241	0.575848	0.991444	-0.0473407	0.239692
Tas	P0A9T4	TAS_ECOLI	Protein tas	21.8314	21.9993	0.406565	0.238097	-0.617127	0.577973	0.991444	-0.167871	0.238092
Quef	Q46920	QUEF_ECOLI	NADPH-dependent 7-cyano-7-deazaguanine reductase	20.8467	21.0213	0.154214	0.448681	-0.637158	0.578166	0.991444	-0.17453	0.237948
Tolc	P02930	TOLC_ECOLI	Outer membrane protein TolC	22.9899	23.4367	1.18001	0.213911	-0.645323	0.581274	0.991444	-0.446812	0.235619
Ypfj	P64429	YPFJ_ECOLI	Uncharacterized protein YpfJ	16.0714	14.7199	2.78169	2.76418	0.596957	0.582684	0.991444	1.35157	0.234567
Mnmg	P0A6U3	MNMG_ECOLI	tRNA uridine 5-carboxymethylaminomethyl modification enzyme MnmG	21.0507	20.7782	0.187529	0.717526	0.636292	0.582764	0.991444	0.272446	0.234507
Tsac	P45748	TSAC_ECOLI	Threonylcarbamoyl-AMP synthase	20.4095	20.7096	0.526938	0.687591	-0.599982	0.582907	0.991444	-0.30008	0.234401
Infa	P69222	IF1_ECOLI	Translation initiation factor IF-1	21.7648	21.8893	0.187638	0.304128	-0.603343	0.584924	0.991444	-0.124481	0.2329
Ispa	P22939	ISPA_ECOLI	Farnesyl diphosphate synthase	19.1989	19.6771	0.898336	1.06491	-0.594538	0.585006	0.991444	-0.47823	0.23284
Kefg	P0A756	KEFG_ECOLI	Glutathione-regulated potassium-efflux system ancillary protein KefG	13.441	14.0352	0.398047	1.57835	-0.632294	0.585383	0.991444	-0.594224	0.23256
Rpst	P0A7U7	RS20_ECOLI	30S ribosomal protein S20	23.3389	23.4665	0.272289	0.255096	-0.592599	0.585455	0.991444	-0.127657	0.232506
Yahd	P77736	YAHD_ECOLI	Putative ankyrin repeat protein YahD	19.7293	18.1193	0.19823	4.33399	0.642782	0.58598	0.991444	1.61007	0.232117
Nusa	P0AFF6	NUSA_ECOLI	Transcription termination/antitermination protein NusA	24.817	24.6813	0.161991	0.349594	0.610126	0.587394	0.991444	0.135725	0.23107
Many	P69801	PTNC_ECOLI	Mannose permease IIC component	20.3305	20.286	0.0655746	0.110715	0.598602	0.588616	0.991444	0.0444712	0.230168
Trka	P0AGI8	TRKA_ECOLI	Trk system potassium uptake protein TrkA	20.0716	19.9628	0.106693	0.286822	0.615726	0.58873	0.991444	0.108788	0.230084
Yihd	P0ADP9	YIHD_ECOLI	Protein YihD	21.4291	20.8332	0.335053	1.60605	0.629117	0.589007	0.991444	0.59591	0.22988
Rpsq	P0AG63	RS17_ECOLI	30S ribosomal protein S17	23.6433	23.5579	0.0624927	0.228894	0.62325	0.589407	0.991444	0.0853782	0.229584
Msba	P60752	MSBA_ECOLI	Lipid A export ATP-binding/permease protein MsbA	21.4144	21.5859	0.346622	0.374133	-0.582615	0.591587	0.991444	-0.171557	0.227981
Btue	P06610	BTUE_ECOLI	Vitamin B12 transport periplasmic protein BtuE	21.8783	21.6195	0.351825	0.6641	0.596545	0.59231	0.991444	0.258841	0.227451
Male	P0AEX9	MALE_ECOLI	Maltose-binding periplasmic protein	26.6354	26.7876	0.204589	0.391519	-0.596773	0.592483	0.991444	-0.152204	0.227324
Slyb	P0A905	SLYB_ECOLI	Outer membrane lipoprotein SlyB	21.7618	22.0241	0.645716	0.423194	-0.588433	0.59257	0.991444	-0.262286	0.22726
Infc	P0A707	IF3_ECOLI	Translation initiation factor IF-3	23.8555	23.7048	0.0407812	0.413717	0.627757	0.593212	0.991444	0.150672	0.22679
Copa	Q59385	COPA_ECOLI	Copper-exporting P-type ATPase A	23.4725	23.5155	0.0797457	0.100241	-0.580189	0.594382	0.991444	-0.0429073	0.225935
Nema	P77258	NEMA_ECOLI	N-ethylmaleimide reductase	22.141	21.8717	0.540203	0.599031	0.578161	0.594455	0.991444	0.269256	0.225881
Tata	P69428	TATA_ECOLI	Sec-independent protein translocase protein TatA	19.9077	20.0745	0.0930211	0.456832	-0.619546	0.59446	0.991444	-0.16676	0.225877
Seqa	P0AFY8	SEQA_ECOLI	Negative modulator of initiation of replication	23.9412	23.7034	0.359355	0.602649	0.587069	0.59533	0.991444	0.237823	0.225242
Rhle	P25888	RHLE_ECOLI	ATP-dependent RNA helicase RhlE	20.0106	20.085	0.204854	0.0349119	-0.620166	0.595336	0.991444	-0.074406	0.225238
Rpss	P0A7U3	RS19_ECOLI	30S ribosomal protein S19	23.7034	23.7849	0.0916372	0.217295	-0.598809	0.595943	0.991444	-0.0815307	0.224796
Yigl	P27848	YIGL_ECOLI	Pyridoxal phosphate phosphatase YigL	19.9992	19.5359	0.687874	1.18197	0.586772	0.596028	0.991444	0.463292	0.224733
Trua	P07649	TRUA_ECOLI	tRNA pseudouridine synthase A	21.3567	21.3065	0.119596	0.0908036	0.578326	0.596148	0.991444	0.0501383	0.224646
Ribd	P25539	RIBD_ECOLI	Riboflavin biosynthesis protein RibD	20.277	20.0965	0.306759	0.442703	0.580579	0.596262	0.991444	0.180537	0.224563
Rho	P0AG30	RHO_ECOLI	Transcription termination factor Rho	25.5848	25.6345	0.0519872	0.133652	-0.599767	0.596991	0.991444	-0.0496584	0.224032
Rpsk	P0A7R9	RS11_ECOLI	30S ribosomal protein S11	24.5275	24.5938	0.181253	0.0563091	-0.605816	0.597378	0.991444	-0.0663853	0.223751
Cpdb	P08331	CPDB_ECOLI	2',3'-cyclic-nucleotide 2'-phosphodiesterase/3'-nucleotidase	22.1806	22.0134	0.13525	0.458044	0.606469	0.597742	0.991444	0.167228	0.223486
Apt	P69503	APT_ECOLI	Adenine phosphoribosyltransferase	22.4706	22.2338	0.383008	0.596863	0.578471	0.598984	0.991444	0.236853	0.222585
Rutb	P75897	RUTB_ECOLI	Peroxyureidoacrylate/ureidoacrylate amidohydrolase RutB	20.3716	20.7044	0.903193	0.345074	-0.596085	0.599448	0.991444	-0.332747	0.222248
Yife	P0ADN2	YIFE_ECOLI	UPF0438 protein YifE	21.2305	21.5627	0.652677	0.772563	-0.568908	0.600641	0.991444	-0.332189	0.221385
Prfb	P07012	RF2_ECOLI	Peptide chain release factor 2	23.4093	23.3046	0.132695	0.280846	0.583517	0.602489	0.991444	0.104645	0.220051
Daua	P0AFR2	DAUA_ECOLI	C4-dicarboxylic acid transporter DauA	16.6114	17.6098	2.72994	1.06608	-0.590011	0.602545	0.991444	-0.998325	0.22001
[truncated: 673 more rows]

## Sheet: MatBC+mal vs RFP+bio+mal_SigUP
Protein	Protein.Group	Protein.Names	Protein.Description	log2_mean_bioHMatBC_20mmMal	log2_mean_bioHRFP_biotin_20mMMal	log2_std_bioHMatBC_20mmMal	log2_std_bioHRFP_biotin_20mMMal	t-test_stat	p-value	p_adjusted(BH)	log2_Fold_change_A/B	Significance
[truncated: 20 more rows]

[truncated: 4 more sheets: MatBC+mal vsRFP+bio+mal_Sigdown, MatBC+bio+malvsRFP+bio+mal_Full, MatBC+bio+malvsRFP+bio+mal_UP, MatBC+bio+malvsRFP+bio+mal_DOWN]
