# Supplementary material for: Engineering controllable alteration of malonyl-CoA levels to enhance polyketide production and versatility in E. coli
Source: Research Square preprint supplement (doi:10.21203/rs.3.rs-4165928/v1), 2024-04-05
Supplement: Supplementary file 2 [file 807fc0a5c846b38ef8700018.xlsx]

## Sheet: Info
	SK-1 (WT)	SK-2 (colony 12)	SK-3 (colony 18)	SK-4 (colonly 11)	SK-5 (colony 13)	SK-6 (colony 15)	SK-7 (colony 16)
Mapped	2155839	2005998	2021798	2317629	1924257	2009843	1566183
Not mapped	55361	37624	38932	39674	31821	50156	24044
Total read	2211200	2043622	2060730	2357303	1956078	2059999	1590227
Mapped read percentage	97.4963	98.159	98.1108	98.317	98.3732	97.5652	98.488
Coverage on genome	103.96	97.98	97.95	113.1	94.45	95	74.63
Coverage on plsmid	865.03	1062.35	1313.59	1023.96	765.28	991.17	1006.35

## Sheet: SK-1 (WT strain not mutated)
Mapping	Reference Position	Type	Length	Reference	Allele	Linkage	Zygosity	Count	Coverage	Frequency	Forward/reverse balance	Average quality	Overlapping annotations	Coding region change	Amino acid change
BAP1_deltaBioH-MatBC mapping	427365	SNV	1	A	C		Homozygous	99	99	100	0.47	33.61	Gene: "hupB gene", CDS: "hupB CDS (HU,_DNA-binding transcriptional regulator,_beta subunit)"	hupB CDS (HU, DNA-binding transcriptional regulator, beta subunit):c.8A>C	hupB CDS (HU, DNA-binding transcriptional regulator, beta subunit):p.Lys3Thr
BAP1_deltaBioH-MatBC mapping	3401244	SNV	1	G	C		Homozygous	109	109	100	0.48	32.68	Gene: "yhgA gene", CDS: "yhgA CDS (transposase_31 family protein)"	yhgA CDS (transposase_31 family protein):c.844G>C	yhgA CDS (transposase_31 family protein):p.Val282Leu
BAP1_deltaBioH-MatBC mapping	3401281	SNV	1	T	G		Homozygous	123	123	100	0.48	34.1
BAP1_deltaBioH-MatBC mapping	1218166	SNV	1	A	C		Homozygous	81	82	98.78	0.49	34.38
BAP1_deltaBioH-MatBC mapping	3401273	SNV	1	C	T		Homozygous	121	125	96.8	0.48	32.84	Gene: "yhgA gene", CDS: "yhgA CDS (transposase_31 family protein)"	yhgA CDS (transposase_31 family protein):c.873C>T
BAP1_deltaBioH-MatBC mapping	3401295	Insertion	1	-	T		Homozygous	119	128	92.97	0.5	35

## Sheet: SK-4 colony 11
Mapping	Reference Position	Type	Length	Reference	Allele	Linkage	Zygosity	Count	Coverage	Frequency	Forward/reverse balance	Average quality	Overlapping annotations	Coding region change	Amino acid change
BAP1_deltaBioH-MatBC mapping	2042782	SNV	1	T	C		Homozygous	86	86	100	0.48	34.13	Gene: "alkA gene", CDS: "alkA CDS (3-methyl-adenine DNA glycosylase II)"	alkA CDS (3-methyl-adenine DNA glycosylase II):c.631A>G	alkA CDS (3-methyl-adenine DNA glycosylase II):p.Thr211Ala
BAP1_deltaBioH-MatBC mapping	2201545	SNV	1	A	G		Homozygous	98	98	100	0.45	33.37	Gene: "apbE gene", CDS: "apbE CDS (putative thiamine-synthetic flavin transferase lipoprotein)"	apbE CDS (putative thiamine-synthetic flavin transferase lipoprotein):c.628T>C	apbE CDS (putative thiamine-synthetic flavin transferase lipoprotein):p.Ser210Pro
BAP1_deltaBioH-MatBC mapping	4390635	SNV	1	C	T		Homozygous	129	129	100	0.49	34.04	Gene: "argI gene", CDS: "argI CDS (ornithine carbamoyltransferase 1)"	argI CDS (ornithine carbamoyltransferase 1):c.121G>A	argI CDS (ornithine carbamoyltransferase 1):p.Ala41Thr
BAP1_deltaBioH-MatBC mapping	2018762	Insertion	1	-	T		Homozygous	118	124	95.16	0.47	36.23	Gene: "cpsG gene", CDS: "cpsG CDS (phosphomannomutase)"	cpsG CDS (phosphomannomutase):c.9_10insA	cpsG CDS (phosphomannomutase):p.Leu4fs
BAP1_deltaBioH-MatBC mapping	1470492	SNV	1	T	C		Homozygous	109	112	97.32	0.49	34.01	Gene: "curA gene", CDS: "curA CDS (curcumin/dihydrocurcumin reductase,_NADPH-dependent)"	curA CDS (curcumin/dihydrocurcumin reductase, NADPH-dependent):c.530T>C	curA CDS (curcumin/dihydrocurcumin reductase, NADPH-dependent):p.Val177Ala
BAP1_deltaBioH-MatBC mapping	815868	SNV	1	G	A		Homozygous	123	123	100	0.47	33.59	Gene: "dinG gene", CDS: "dinG CDS (ATP-dependent DNA helicase)"	dinG CDS (ATP-dependent DNA helicase):c.1934G>A	dinG CDS (ATP-dependent DNA helicase):p.Ser645Asn
BAP1_deltaBioH-MatBC mapping	635616	Deletion	1	A	-		Homozygous	99	101	98.02	0.48	31.92	Gene: "djlC gene", CDS: "djlC CDS (J domain-containing HscC co-chaperone; Hsc56)"	djlC CDS (J domain-containing HscC co-chaperone; Hsc56):c.655delA	djlC CDS (J domain-containing HscC co-chaperone; Hsc56):p.Lys219fs
BAP1_deltaBioH-MatBC mapping	696663	SNV	1	G	A		Homozygous	92	93	98.92	0.49	33.25	Gene: "dtpD gene", CDS: "dtpD CDS (dipeptide and tripeptide permease D)"	dtpD CDS (dipeptide and tripeptide permease D):c.1331C>T	dtpD CDS (dipeptide and tripeptide permease D):p.Ala444Val
BAP1_deltaBioH-MatBC mapping	24207	Deletion	1	A	-		Homozygous	123	129	95.35	0.48	33.93	Gene: "ECD_00025 gene", CDS: "ECD_00025 CDS (hypothetical protein)"	ECD_00025 CDS (hypothetical protein):c.198delT	ECD_00025 CDS (hypothetical protein):p.Phe66fs
BAP1_deltaBioH-MatBC mapping	3743486	SNV	1	G	A		Homozygous	119	120	99.17	0.5	33.57	Gene: "emrD gene", CDS: "emrD CDS (multidrug efflux system protein)"	emrD CDS (multidrug efflux system protein):c.252G>A	emrD CDS (multidrug efflux system protein):p.Met84Ile
BAP1_deltaBioH-MatBC mapping	2346206	Deletion	1	A	-		Homozygous	104	104	100	0.48	32.92	Gene: "fadL gene", CDS: "fadL CDS (long-chain fatty acid outer membrane transporter)"	fadL CDS (long-chain fatty acid outer membrane transporter):c.703delA	fadL CDS (long-chain fatty acid outer membrane transporter):p.Asn235fs
BAP1_deltaBioH-MatBC mapping	3990164	SNV	1	C	T		Homozygous	152	156	97.44	0.45	32.69	Gene: "fdoH gene", CDS: "fdoH CDS (formate dehydrogenase-O,_Fe-S subunit)"	fdoH CDS (formate dehydrogenase-O, Fe-S subunit):c.130G>A	fdoH CDS (formate dehydrogenase-O, Fe-S subunit):p.Ala44Thr
BAP1_deltaBioH-MatBC mapping	568164	SNV	1	C	T		Homozygous	108	108	100	0.48	33.43	Gene: "fepA gene", CDS: "fepA CDS (ferrienterobactin outer membrane transporter)"	fepA CDS (ferrienterobactin outer membrane transporter):c.1690G>A	fepA CDS (ferrienterobactin outer membrane transporter):p.Ala564Thr
BAP1_deltaBioH-MatBC mapping	3026483	SNV	1	T	C		Homozygous	128	128	100	0.49	34.69	Gene: "ftsP gene", CDS: "ftsP CDS (septal ring component that protects the divisome from stress; multicopy suppressor of ftsI(Ts))"	ftsP CDS (septal ring component that protects the divisome from stress; multicopy suppressor of ftsI(Ts)):c.497A>G	ftsP CDS (septal ring component that protects the divisome from stress; multicopy suppressor of ftsI(Ts)):p.Glu166Gly
BAP1_deltaBioH-MatBC mapping	2917039	SNV	1	T	C		Homozygous	118	118	100	0.47	33.45	Gene: "galP gene", CDS: "galP CDS (D-galactose transporter)"	galP CDS (D-galactose transporter):c.1025T>C	galP CDS (D-galactose transporter):p.Ile342Thr
BAP1_deltaBioH-MatBC mapping	4203180	SNV	1	T	A		Homozygous	99	99	100	0.47	34.55	Gene: "gltP gene", CDS: "gltP CDS (glutamate/aspartate:proton symporter)"	gltP CDS (glutamate/aspartate:proton symporter):c.341T>A	gltP CDS (glutamate/aspartate:proton symporter):p.Met114Lys
BAP1_deltaBioH-MatBC mapping	4494407	SNV	1	C	T		Homozygous	134	139	96.4	0.49	35.13	Gene: "hsdR gene", CDS: "hsdR CDS (endonuclease R Type I restriction enzyme)"	hsdR CDS (endonuclease R Type I restriction enzyme):c.418G>A	hsdR CDS (endonuclease R Type I restriction enzyme):p.Glu140Lys
BAP1_deltaBioH-MatBC mapping	427365	SNV	1	A	C		Homozygous	99	100	99	0.48	35.35	Gene: "hupB gene", CDS: "hupB CDS (HU,_DNA-binding transcriptional regulator,_beta subunit)"	hupB CDS (HU, DNA-binding transcriptional regulator, beta subunit):c.8A>C	hupB CDS (HU, DNA-binding transcriptional regulator, beta subunit):p.Lys3Thr
BAP1_deltaBioH-MatBC mapping	1036489	SNV	1	C	T		Homozygous	109	109	100	0.5	34.86	Gene: "hyaB gene", CDS: "hyaB CDS (hydrogenase 1,_large subunit)"	hyaB CDS (hydrogenase 1, large subunit):c.1274C>T	hyaB CDS (hydrogenase 1, large subunit):p.Ala425Val
BAP1_deltaBioH-MatBC mapping	2781935	SNV	1	G	A		Homozygous	109	109	100	0.5	33.7	Gene: "mltA gene", CDS: "mltA CDS (membrane-bound lytic murein transglycosylase A)"	mltA CDS (membrane-bound lytic murein transglycosylase A):c.397C>T	mltA CDS (membrane-bound lytic murein transglycosylase A):p.Gln133*
BAP1_deltaBioH-MatBC mapping	1021862	SNV	1	G	A		Homozygous	107	108	99.07	0.47	34.91	Gene: "ompA gene", CDS: "ompA CDS (outer membrane protein A (3a;II*;G;d))"	ompA CDS (outer membrane protein A (3a;II*;G;d)):c.154C>T	ompA CDS (outer membrane protein A (3a;II*;G;d)):p.His52Tyr
BAP1_deltaBioH-MatBC mapping	4518118	SNV	1	C	T		Homozygous	117	117	100	0.46	34.01	Gene: "opgB gene", CDS: "opgB CDS (OPG periplasmic biosynthetic phosphoglycerol transferases I (membrane-bound) and II (soluble))"	opgB CDS (OPG periplasmic biosynthetic phosphoglycerol transferases I (membrane-bound) and II (soluble)):c.646G>A	opgB CDS (OPG periplasmic biosynthetic phosphoglycerol transferases I (membrane-bound) and II (soluble)):p.Val216Met
BAP1_deltaBioH-MatBC mapping	271491	SNV	1	T	C		Homozygous	93	94	98.94	0.48	34.22	Gene: "paoB gene", CDS: "paoB CDS (PaoABC aldehyde oxidoreductase,_FAD-containing subunit)"	paoB CDS (PaoABC aldehyde oxidoreductase, FAD-containing subunit):c.584A>G	paoB CDS (PaoABC aldehyde oxidoreductase, FAD-containing subunit):p.His195Arg
BAP1_deltaBioH-MatBC mapping	258778	SNV	1	A	G		Homozygous	120	120	100	0.5	34.38	Gene: "pepD gene", CDS: "pepD CDS (aminoacyl-histidine dipeptidase (peptidase D))"	pepD CDS (aminoacyl-histidine dipeptidase (peptidase D)):c.1433T>C	pepD CDS (aminoacyl-histidine dipeptidase (peptidase D)):p.Leu478Pro
BAP1_deltaBioH-MatBC mapping	899223	SNV	1	T	C		Homozygous	70	70	100	0.46	34.8	Gene: "potI gene", CDS: "potI CDS (putrescine ABC transporter permease)"	potI CDS (putrescine ABC transporter permease):c.563T>C	potI CDS (putrescine ABC transporter permease):p.Ile188Thr
BAP1_deltaBioH-MatBC mapping	1526466	SNV	1	A	G		Homozygous	105	108	97.22	0.49	34.22	Gene: "pqqL gene", CDS: "pqqL CDS (putative periplasmic M16 family zinc metalloendopeptidase)"	pqqL CDS (putative periplasmic M16 family zinc metalloendopeptidase):c.1091T>C	pqqL CDS (putative periplasmic M16 family zinc metalloendopeptidase):p.Leu364Ser
BAP1_deltaBioH-MatBC mapping	1191542	SNV	1	A	G		Homozygous	100	102	98.04	0.48	34.08	Gene: "purB gene", CDS: "purB CDS (adenylosuccinate lyase)"	purB CDS (adenylosuccinate lyase):c.685T>C	purB CDS (adenylosuccinate lyase):p.Phe229Leu
BAP1_deltaBioH-MatBC mapping	2609164	SNV	1	A	G		Homozygous	119	119	100	0.48	33.61	Gene: "rimM gene", CDS: "rimM CDS (ribosome maturation factor)"	rimM CDS (ribosome maturation factor):c.142T>C	rimM CDS (ribosome maturation factor):p.Phe48Leu
BAP1_deltaBioH-MatBC mapping	2504837	SNV	1	T	C		Homozygous	136	136	100	0.46	35	Gene: "rlmN gene", CDS: "rlmN CDS (dual specificity 23S rRNA m(2)A2503,_tRNA m(2)A37 methyltransferase,_SAM-dependent)"	rlmN CDS (dual specificity 23S rRNA m(2)A2503, tRNA m(2)A37 methyltransferase, SAM-dependent):c.800A>G	rlmN CDS (dual specificity 23S rRNA m(2)A2503, tRNA m(2)A37 methyltransferase, SAM-dependent):p.Lys267Arg
BAP1_deltaBioH-MatBC mapping	3468145	SNV	1	T	C		Homozygous	137	137	100	0.49	32.61	Gene: "rsmD gene", CDS: "rsmD CDS (16S rRNA m(2)G966 methyltransferase,_SAM-dependent)"	rsmD CDS (16S rRNA m(2)G966 methyltransferase, SAM-dependent):c.422T>C	rsmD CDS (16S rRNA m(2)G966 methyltransferase, SAM-dependent):p.Leu141Ser
BAP1_deltaBioH-MatBC mapping	1071334	SNV	1	A	G		Homozygous	93	93	100	0.47	34.11	Gene: "rutF gene", CDS: "rutF CDS (flavin:NADH reductase)"	rutF CDS (flavin:NADH reductase):c.176T>C	rutF CDS (flavin:NADH reductase):p.Val59Ala
BAP1_deltaBioH-MatBC mapping	998968	SNV	1	C	A		Homozygous	92	93	98.92	0.46	33.95	Gene: "ssuE gene", CDS: "ssuE CDS (NAD(P)H-dependent FMN reductase)"	ssuE CDS (NAD(P)H-dependent FMN reductase):c.507G>T	ssuE CDS (NAD(P)H-dependent FMN reductase):p.Trp169Cys
BAP1_deltaBioH-MatBC mapping	731876	SNV	1	G	A		Homozygous	110	111	99.1	0.49	33.7	Gene: "tolA gene", CDS: "tolA CDS (membrane anchored protein in TolA-TolQ-TolR complex)"	tolA CDS (membrane anchored protein in TolA-TolQ-TolR complex):c.1G>A	tolA CDS (membrane anchored protein in TolA-TolQ-TolR complex):p.Val1Met
BAP1_deltaBioH-MatBC mapping	4325919	SNV	1	A	G		Homozygous	99	101	98.02	0.44	34.2	Gene: "ulaR gene", CDS: "ulaR CDS (transcriptional repressor for the L-ascorbate utilization divergent operon)"	ulaR CDS (transcriptional repressor for the L-ascorbate utilization divergent operon):c.2T>C	ulaR CDS (transcriptional repressor for the L-ascorbate utilization divergent operon):p.Met1?
BAP1_deltaBioH-MatBC mapping	3105641	SNV	1	G	T		Homozygous	110	110	100	0.47	32.38	Gene: "uxaA gene", CDS: "uxaA CDS (altronate hydrolase)"	uxaA CDS (altronate hydrolase):c.846C>A	uxaA CDS (altronate hydrolase):p.Phe282Leu
BAP1_deltaBioH-MatBC mapping	3592744	SNV	1	C	T		Homozygous	139	139	100	0.47	35.19	Gene: "xylA gene", CDS: "xylA CDS (D-xylose isomerase)"	xylA CDS (D-xylose isomerase):c.1123G>A	xylA CDS (D-xylose isomerase):p.Glu375Lys
BAP1_deltaBioH-MatBC mapping	355912	SNV	1	G	A		Homozygous	111	111	100	0.45	34.1	Gene: "yaiT gene", CDS: "yaiT CDS (hypothetical protein)"	yaiT CDS (hypothetical protein):c.2903G>A	yaiT CDS (hypothetical protein):p.Trp968*
BAP1_deltaBioH-MatBC mapping	974174	SNV	1	G	A		Homozygous	83	84	98.81	0.49	33.83	Gene: "ycbJ gene", CDS: "ycbJ CDS (protein kinase-like domain protein)"	ycbJ CDS (protein kinase-like domain protein):c.460G>A	ycbJ CDS (protein kinase-like domain protein):p.Val154Met
BAP1_deltaBioH-MatBC mapping	1201017	SNV	1	A	G		Homozygous	114	115	99.13	0.48	34.24	Gene: "ycgZ gene", CDS: "ycgZ CDS (RcsB connector protein for regulation of biofilm and acid-resistance)"	ycgZ CDS (RcsB connector protein for regulation of biofilm and acid-resistance):c.197A>G	ycgZ CDS (RcsB connector protein for regulation of biofilm and acid-resistance):p.Gln66Arg
BAP1_deltaBioH-MatBC mapping	1242083	SNV	1	C	T		Homozygous	107	109	98.17	0.48	32.99	Gene: "ychF gene", CDS: "ychF CDS (catalase inhibitor protein; ATPase,_K+-dependent,_ribosome-associated)"	ychF CDS (catalase inhibitor protein; ATPase, K+-dependent, ribosome-associated):c.751G>A	ychF CDS (catalase inhibitor protein; ATPase, K+-dependent, ribosome-associated):p.Glu251Lys
BAP1_deltaBioH-MatBC mapping	1417638	SNV	1	A	G		Homozygous	124	125	99.2	0.48	33.34	Gene: "ydbH gene", CDS: "ydbH CDS (putative membrane-anchored protein,_function unknown)"	ydbH CDS (putative membrane-anchored protein, function unknown):c.2156A>G	ydbH CDS (putative membrane-anchored protein, function unknown):p.Asn719Ser
BAP1_deltaBioH-MatBC mapping	1459094	SNV	1	G	A		Homozygous	107	107	100	0.46	34.6	Gene: "ydcP gene", CDS: "ydcP CDS (putative peptidase)"	ydcP CDS (putative peptidase):c.1378G>A	ydcP CDS (putative peptidase):p.Gly460Ser
BAP1_deltaBioH-MatBC mapping	2928999	SNV	1	T	C		Homozygous	128	129	99.22	0.48	33.62	Gene: "yggN gene", CDS: "yggN CDS (DUF2884 family putative periplasmic protein)"	yggN CDS (DUF2884 family putative periplasmic protein):c.266A>G	yggN CDS (DUF2884 family putative periplasmic protein):p.Glu89Gly
BAP1_deltaBioH-MatBC mapping	3401244	SNV	1	G	C		Homozygous	130	130	100	0.49	33.14	Gene: "yhgA gene", CDS: "yhgA CDS (transposase_31 family protein)"	yhgA CDS (transposase_31 family protein):c.844G>C	yhgA CDS (transposase_31 family protein):p.Val282Leu
BAP1_deltaBioH-MatBC mapping	3968749	SNV	1	A	G		Homozygous	112	112	100	0.49	33.96	Gene: "yihL gene", CDS: "yihL CDS (putative DNA-binding transcriptional regulator)"	yihL CDS (putative DNA-binding transcriptional regulator):c.658A>G	yihL CDS (putative DNA-binding transcriptional regulator):p.Ile220Val
BAP1_deltaBioH-MatBC mapping	4057661	SNV	1	A	G		Homozygous	111	112	99.11	0.47	33.81	Gene: "yijO gene", CDS: "yijO CDS (AraC family putative transcriptional activator)"	yijO CDS (AraC family putative transcriptional activator):c.151T>C	yijO CDS (AraC family putative transcriptional activator):p.Phe51Leu
BAP1_deltaBioH-MatBC mapping	4475956	SNV	1	T	C		Homozygous	100	101	99.01	0.49	34.57	Gene: "yjiM gene", CDS: "yjiM CDS (putative 2-hydroxyglutaryl-CoA dehydratase)"	yjiM CDS (putative 2-hydroxyglutaryl-CoA dehydratase):c.121A>G	yjiM CDS (putative 2-hydroxyglutaryl-CoA dehydratase):p.Thr41Ala
BAP1_deltaBioH-MatBC mapping	4674	SNV	1	G	A		Homozygous	127	127	100	0.49	33.87	Gene: "thrC gene", CDS: "thrC CDS (L-threonine synthase)"	thrC CDS (L-threonine synthase):c.942G>A
BAP1_deltaBioH-MatBC mapping	12760	SNV	1	C	T		Homozygous	152	152	100	0.49	34.88	Gene: "dnaK gene", CDS: "dnaK CDS (chaperone Hsp70,_with co-chaperone DnaJ)"	dnaK CDS (chaperone Hsp70, with co-chaperone DnaJ):c.600C>T
BAP1_deltaBioH-MatBC mapping	81013	SNV	1	G	A		Homozygous	120	120	100	0.48	33.44	Gene: "setA gene", CDS: "setA CDS (broad specificity sugar efflux system)"	setA CDS (broad specificity sugar efflux system):c.588G>A
BAP1_deltaBioH-MatBC mapping	672730	SNV	1	T	C		Homozygous	109	109	100	0.5	35.06	Gene: "ybfGH gene", CDS: "ybfGH CDS (hypothetical protein)"	ybfGH CDS (hypothetical protein):c.615A>G
BAP1_deltaBioH-MatBC mapping	1218166	SNV	1	A	C		Homozygous	89	89	100	0.49	34.19
BAP1_deltaBioH-MatBC mapping	1381147	SNV	1	A	G		Homozygous	92	92	100	0.48	34.37	Gene: "fnr gene"
BAP1_deltaBioH-MatBC mapping	1440982	SNV	1	A	G		Homozygous	114	114	100	0.47	35.04
BAP1_deltaBioH-MatBC mapping	1853962	SNV	1	T	C		Homozygous	93	93	100	0.46	32.57	Gene: "yebQ gene", CDS: "yebQ CDS (putative transporter)"	yebQ CDS (putative transporter):c.1089T>C
BAP1_deltaBioH-MatBC mapping	1987582	SNV	1	G	A		Homozygous	65	65	100	0.48	32.29	Gene: "hisH gene", CDS: "hisH CDS (imidazole glycerol phosphate synthase,_glutamine amidotransferase subunit)"	hisH CDS (imidazole glycerol phosphate synthase, glutamine amidotransferase subunit):c.372G>A
BAP1_deltaBioH-MatBC mapping	2224630	SNV	1	T	C		Homozygous	105	105	100	0.49	35	Gene: "gyrA gene", CDS: "gyrA CDS (DNA gyrase (type II topoisomerase),_subunit A)"	gyrA CDS (DNA gyrase (type II topoisomerase), subunit A):c.2025A>G
BAP1_deltaBioH-MatBC mapping	2985274	SNV	1	G	A		Homozygous	125	125	100	0.47	33.21
BAP1_deltaBioH-MatBC mapping	3332723	SNV	1	A	G		Homozygous	98	98	100	0.49	32.79	Gene: "yheO gene", CDS: "yheO CDS (putative PAS domain-containing DNA-binding transcriptional regulator)"	yheO CDS (putative PAS domain-containing DNA-binding transcriptional regulator):c.192T>C
BAP1_deltaBioH-MatBC mapping	3401273	SNV	1	C	T		Homozygous	124	124	100	0.49	32.61	Gene: "yhgA gene", CDS: "yhgA CDS (transposase_31 family protein)"	yhgA CDS (transposase_31 family protein):c.873C>T
BAP1_deltaBioH-MatBC mapping	3742967	SNV	1	G	A		Homozygous	129	129	100	0.47	34.7
BAP1_deltaBioH-MatBC mapping	4284874	SNV	1	G	A		Homozygous	144	144	100	0.47	34.69
BAP1_deltaBioH-MatBC mapping	4442316	SNV	1	C	T		Homozygous	97	97	100	0.48	35.11	Gene: "yjhP gene", CDS: "yjhP CDS (putative methyltransferase)", Misc. feature: "phage-like element KpLE2"	yjhP CDS (putative methyltransferase):c.318G>A
BAP1_deltaBioH-MatBC mapping	3558436	SNV	1	T	C		Homozygous	148	149	99.33	0.46	34.36
BAP1_deltaBioH-MatBC mapping	4426944	SNV	1	C	T		Homozygous	129	130	99.23	0.48	33.83	Gene: "fecC gene", CDS: "fecC CDS (ferric citrate ABC transporter permease)", Misc. feature: "phage-like element KpLE2"	fecC CDS (ferric citrate ABC transporter permease):c.810G>A
BAP1_deltaBioH-MatBC mapping	8508	SNV	1	C	G		Homozygous	122	123	99.19	0.48	32.67	Gene: "talB gene", CDS: "talB CDS (transaldolase B)"	talB CDS (transaldolase B):c.273C>G
BAP1_deltaBioH-MatBC mapping	3018395	SNV	1	T	C		Homozygous	121	122	99.18	0.5	33.69	Gene: "yghB gene", CDS: "yghB CDS (general envelope maintenance protein; DedA family inner membrane protein; putative multidrug efflux transporter)"	yghB CDS (general envelope maintenance protein; DedA family inner membrane protein; putative multidrug efflux transporter):c.523T>C
BAP1_deltaBioH-MatBC mapping	99676	SNV	1	G	A		Homozygous	96	97	98.97	0.49	32.56	Gene: "mraY gene", CDS: "mraY CDS (phospho-N-acetylmuramoyl-pentapeptide transferase)"	mraY CDS (phospho-N-acetylmuramoyl-pentapeptide transferase):c.870G>A
BAP1_deltaBioH-MatBC mapping	4005247	SNV	1	C	T		Homozygous	85	86	98.84	0.48	33.52	Gene: "rhaB gene", CDS: "rhaB CDS (rhamnulokinase)"	rhaB CDS (rhamnulokinase):c.1071G>A
BAP1_deltaBioH-MatBC mapping	1125112	SNV	1	A	G		Homozygous	82	83	98.8	0.49	33.68	Gene: "rimJ gene", CDS: "rimJ CDS (ribosomal-protein-S5-alanine N-acetyltransferase)"	rimJ CDS (ribosomal-protein-S5-alanine N-acetyltransferase):c.108A>G
BAP1_deltaBioH-MatBC mapping	3401281	SNV	1	T	G		Homozygous	127	129	98.45	0.49	32.83
BAP1_deltaBioH-MatBC mapping	1945126	SNV	1	G	A		Homozygous	116	118	98.31	0.5	32.97	Gene: "ECD_04329 gene", CDS: "ECD_04329 CDS (hypothetical protein)"	ECD_04329 CDS (hypothetical protein):c.186G>A
BAP1_deltaBioH-MatBC mapping	3402999	SNV	1	C	A		Homozygous	109	111	98.2	0.49	33.83	Protein binding site: "lac operator"
BAP1_deltaBioH-MatBC mapping	3021797	Deletion	1	C	-		Homozygous	114	117	97.44	0.46	34
BAP1_deltaBioH-MatBC mapping	945334	SNV	1	A	T		Homozygous	111	114	97.37	0.49	34.51	Gene: "dmsA gene", CDS: "dmsA CDS (dimethyl sulfoxide reductase,_anaerobic,_subunit A)"	dmsA CDS (dimethyl sulfoxide reductase, anaerobic, subunit A):c.2412A>T
BAP1_deltaBioH-MatBC mapping	3401295	Insertion	1	-	T		Homozygous	119	123	96.75	0.49	34.29

## Sheet: SK-2 colony 12
Mapping	Reference Position	Type	Length	Reference	Allele	Linkage	Zygosity	Count	Coverage	Frequency	Forward/reverse balance	Average quality	Overlapping annotations	Coding region change	Amino acid change	gene name
BAP1_deltaBioH-MatBC mapping	2042782	SNV	1	T	C		Homozygous	111	111	100	0.48	34.58	Gene: "alkA gene", CDS: "alkA CDS (3-methyl-adenine DNA glycosylase II)"	alkA CDS (3-methyl-adenine DNA glycosylase II):c.631A>G	alkA CDS (3-methyl-adenine DNA glycosylase II):p.Thr211Ala	alkA
BAP1_deltaBioH-MatBC mapping	511717	SNV	1	C	T		Homozygous	75	76	98.68	0.44	31.68	Gene: "allD gene", CDS: "allD CDS (ureidoglycolate dehydrogenase)"	allD CDS (ureidoglycolate dehydrogenase):c.665G>A	allD CDS (ureidoglycolate dehydrogenase):p.Gly222Glu	allD
BAP1_deltaBioH-MatBC mapping	2946540	SNV	1	G	A		Homozygous	84	85	98.82	0.49	32.07	Gene: "ECD_02817 gene", CDS: "ECD_02817 CDS (KpsU protein)"	ECD_02817 CDS (KpsU protein):c.55G>A	ECD_02817 CDS (KpsU protein):p.Gly19Ser
BAP1_deltaBioH-MatBC mapping	3914142	Deletion	1	C	-		Homozygous	83	87	95.4	0.47	34.6	Gene: "ECD_03713 gene", CDS: "ECD_03713 CDS (hypothetical protein)"	ECD_03713 CDS (hypothetical protein):c.134delG	ECD_03713 CDS (hypothetical protein):p.Gly45fs
BAP1_deltaBioH-MatBC mapping	3921580	SNV	1	C	T		Homozygous	100	101	99.01	0.5	34.78	Gene: "ECD_03721 gene", CDS: "ECD_03721 CDS (hypothetical protein)"	ECD_03721 CDS (hypothetical protein):c.956G>A	ECD_03721 CDS (hypothetical protein):p.Arg319His
BAP1_deltaBioH-MatBC mapping	2343705	SNV	1	C	T		Homozygous	110	110	100	0.42	33.75	Gene: "fadI gene", CDS: "fadI CDS (beta-ketoacyl-CoA thiolase,_anaerobic,_subunit)"	fadI CDS (beta-ketoacyl-CoA thiolase, anaerobic, subunit):c.963G>A	fadI CDS (beta-ketoacyl-CoA thiolase, anaerobic, subunit):p.Trp321*	fadI
BAP1_deltaBioH-MatBC mapping	3026483	SNV	1	T	C		Homozygous	84	84	100	0.45	34.12	Gene: "ftsP gene", CDS: "ftsP CDS (septal ring component that protects the divisome from stress; multicopy suppressor of ftsI(Ts))"	ftsP CDS (septal ring component that protects the divisome from stress; multicopy suppressor of ftsI(Ts)):c.497A>G	ftsP CDS (septal ring component that protects the divisome from stress; multicopy suppressor of ftsI(Ts)):p.Glu166Gly	ftsP
BAP1_deltaBioH-MatBC mapping	2917039	SNV	1	T	C		Homozygous	83	84	98.81	0.46	33.99	Gene: "galP gene", CDS: "galP CDS (D-galactose transporter)"	galP CDS (D-galactose transporter):c.1025T>C	galP CDS (D-galactose transporter):p.Ile342Thr
BAP1_deltaBioH-MatBC mapping	4203180	SNV	1	T	A		Homozygous	88	88	100	0.47	35.69	Gene: "gltP gene", CDS: "gltP CDS (glutamate/aspartate:proton symporter)"	gltP CDS (glutamate/aspartate:proton symporter):c.341T>A	gltP CDS (glutamate/aspartate:proton symporter):p.Met114Lys
BAP1_deltaBioH-MatBC mapping	427365	SNV	1	A	C		Homozygous	104	104	100	0.47	35.95	Gene: "hupB gene", CDS: "hupB CDS (HU,_DNA-binding transcriptional regulator,_beta subunit)"	hupB CDS (HU, DNA-binding transcriptional regulator, beta subunit):c.8A>C	hupB CDS (HU, DNA-binding transcriptional regulator, beta subunit):p.Lys3Thr
BAP1_deltaBioH-MatBC mapping	1036489	SNV	1	C	T		Homozygous	93	93	100	0.49	34.09	Gene: "hyaB gene", CDS: "hyaB CDS (hydrogenase 1,_large subunit)"	hyaB CDS (hydrogenase 1, large subunit):c.1274C>T	hyaB CDS (hydrogenase 1, large subunit):p.Ala425Val
BAP1_deltaBioH-MatBC mapping	779217	SNV	1	G	A		Homozygous	91	92	98.91	0.47	34.33	Gene: "L gene", CDS: "L CDS (tail component)", Misc. feature: "cryptic prophage DE3; also submitted separately as GenBank Accession Number EU078592"	L CDS (tail component):c.442G>A	L CDS (tail component):p.Ala148Thr
BAP1_deltaBioH-MatBC mapping	4485777	Deletion	1	T	-		Homozygous	98	99	98.99	0.43	32.56	Gene: "mcrB gene", CDS: "mcrB CDS (5-methylcytosine-specific restriction enzyme McrBC,_subunit McrB)"	mcrB CDS (5-methylcytosine-specific restriction enzyme McrBC, subunit McrB):c.818delA	mcrB CDS (5-methylcytosine-specific restriction enzyme McrBC, subunit McrB):p.Lys273fs
BAP1_deltaBioH-MatBC mapping	1021862	SNV	1	G	A		Homozygous	104	104	100	0.47	33.8	Gene: "ompA gene", CDS: "ompA CDS (outer membrane protein A (3a;II*;G;d))"	ompA CDS (outer membrane protein A (3a;II*;G;d)):c.154C>T	ompA CDS (outer membrane protein A (3a;II*;G;d)):p.His52Tyr
BAP1_deltaBioH-MatBC mapping	4518118	SNV	1	C	T		Homozygous	70	70	100	0.5	35.39	Gene: "opgB gene", CDS: "opgB CDS (OPG periplasmic biosynthetic phosphoglycerol transferases I (membrane-bound) and II (soluble))"	opgB CDS (OPG periplasmic biosynthetic phosphoglycerol transferases I (membrane-bound) and II (soluble)):c.646G>A	opgB CDS (OPG periplasmic biosynthetic phosphoglycerol transferases I (membrane-bound) and II (soluble)):p.Val216Met
BAP1_deltaBioH-MatBC mapping	899223	SNV	1	T	C		Homozygous	62	62	100	0.47	35.32	Gene: "potI gene", CDS: "potI CDS (putrescine ABC transporter permease)"	potI CDS (putrescine ABC transporter permease):c.563T>C	potI CDS (putrescine ABC transporter permease):p.Ile188Thr
BAP1_deltaBioH-MatBC mapping	1526466	SNV	1	A	G		Homozygous	104	110	94.55	0.5	34.01	Gene: "pqqL gene", CDS: "pqqL CDS (putative periplasmic M16 family zinc metalloendopeptidase)"	pqqL CDS (putative periplasmic M16 family zinc metalloendopeptidase):c.1091T>C	pqqL CDS (putative periplasmic M16 family zinc metalloendopeptidase):p.Leu364Ser
BAP1_deltaBioH-MatBC mapping	2659431	SNV	1	A	T		Homozygous	98	99	98.99	0.48	34.56	Gene: "recX gene", CDS: "recX CDS (regulatory protein for RecA)"	recX CDS (regulatory protein for RecA):c.48T>A	recX CDS (regulatory protein for RecA):p.Asp16Glu
BAP1_deltaBioH-MatBC mapping	2609164	SNV	1	A	G		Homozygous	95	96	98.96	0.46	33.53	Gene: "rimM gene", CDS: "rimM CDS (ribosome maturation factor)"	rimM CDS (ribosome maturation factor):c.142T>C	rimM CDS (ribosome maturation factor):p.Phe48Leu
BAP1_deltaBioH-MatBC mapping	2504837	SNV	1	T	C		Homozygous	98	99	98.99	0.46	34.23	Gene: "rlmN gene", CDS: "rlmN CDS (dual specificity 23S rRNA m(2)A2503,_tRNA m(2)A37 methyltransferase,_SAM-dependent)"	rlmN CDS (dual specificity 23S rRNA m(2)A2503, tRNA m(2)A37 methyltransferase, SAM-dependent):c.800A>G	rlmN CDS (dual specificity 23S rRNA m(2)A2503, tRNA m(2)A37 methyltransferase, SAM-dependent):p.Lys267Arg
BAP1_deltaBioH-MatBC mapping	1071334	SNV	1	A	G		Homozygous	85	85	100	0.47	34.25	Gene: "rutF gene", CDS: "rutF CDS (flavin:NADH reductase)"	rutF CDS (flavin:NADH reductase):c.176T>C	rutF CDS (flavin:NADH reductase):p.Val59Ala
BAP1_deltaBioH-MatBC mapping	998968	SNV	1	C	A		Homozygous	106	106	100	0.45	33.86	Gene: "ssuE gene", CDS: "ssuE CDS (NAD(P)H-dependent FMN reductase)"	ssuE CDS (NAD(P)H-dependent FMN reductase):c.507G>T	ssuE CDS (NAD(P)H-dependent FMN reductase):p.Trp169Cys
BAP1_deltaBioH-MatBC mapping	2635057	Insertion	1	-	T		Homozygous	75	83	90.36	0.47	35.61	Gene: "stpA gene", CDS: "stpA CDS (DNA binding protein,_nucleoid-associated)"	stpA CDS (DNA binding protein, nucleoid-associated):c.172_173insA	stpA CDS (DNA binding protein, nucleoid-associated):p.Ile58fs
BAP1_deltaBioH-MatBC mapping	2440458	SNV	1	A	G		Homozygous	80	80	100	0.44	32.75	Gene: "talA gene", CDS: "talA CDS (transaldolase A)"	talA CDS (transaldolase A):c.431A>G	talA CDS (transaldolase A):p.Glu144Gly
BAP1_deltaBioH-MatBC mapping	731876	SNV	1	G	A		Homozygous	115	116	99.14	0.48	33.78	Gene: "tolA gene", CDS: "tolA CDS (membrane anchored protein in TolA-TolQ-TolR complex)"	tolA CDS (membrane anchored protein in TolA-TolQ-TolR complex):c.1G>A	tolA CDS (membrane anchored protein in TolA-TolQ-TolR complex):p.Val1Met
BAP1_deltaBioH-MatBC mapping	237789	Deletion	1	G	-		Homozygous	89	94	94.68	0.48	32.06	Gene: "yafS gene", CDS: "yafS CDS (putative S-adenosyl-L-methionine-dependent methyltransferase)"	yafS CDS (putative S-adenosyl-L-methionine-dependent methyltransferase):c.47delG	yafS CDS (putative S-adenosyl-L-methionine-dependent methyltransferase):p.Trp16fs
BAP1_deltaBioH-MatBC mapping	974174	SNV	1	G	A		Homozygous	86	86	100	0.47	34.24	Gene: "ycbJ gene", CDS: "ycbJ CDS (protein kinase-like domain protein)"	ycbJ CDS (protein kinase-like domain protein):c.460G>A	ycbJ CDS (protein kinase-like domain protein):p.Val154Met
BAP1_deltaBioH-MatBC mapping	1355826	SNV	1	A	G		Homozygous	108	108	100	0.45	34.02	Gene: "ycjN gene", CDS: "ycjN CDS (putative ABC sugar transporter periplasmic binding protein)"	ycjN CDS (putative ABC sugar transporter periplasmic binding protein):c.679A>G	ycjN CDS (putative ABC sugar transporter periplasmic binding protein):p.Met227Val
BAP1_deltaBioH-MatBC mapping	1459094	SNV	1	G	A		Homozygous	101	101	100	0.49	34.31	Gene: "ydcP gene", CDS: "ydcP CDS (putative peptidase)"	ydcP CDS (putative peptidase):c.1378G>A	ydcP CDS (putative peptidase):p.Gly460Ser
BAP1_deltaBioH-MatBC mapping	1872905	Insertion	1	-	T		Homozygous	80	81	98.77	0.49	33.99	Gene: "yebF gene", CDS: "yebF CDS (extracellular Colicin M immunity family protein)"	yebF CDS (extracellular Colicin M immunity family protein):c.83_84insA	yebF CDS (extracellular Colicin M immunity family protein):p.Lys28fs
BAP1_deltaBioH-MatBC mapping	2928999	SNV	1	T	C		Homozygous	96	97	98.97	0.47	34.53	Gene: "yggN gene", CDS: "yggN CDS (DUF2884 family putative periplasmic protein)"	yggN CDS (DUF2884 family putative periplasmic protein):c.266A>G	yggN CDS (DUF2884 family putative periplasmic protein):p.Glu89Gly
BAP1_deltaBioH-MatBC mapping	3401244	SNV	1	G	C		Homozygous	87	87	100	0.48	34.47	Gene: "yhgA gene", CDS: "yhgA CDS (transposase_31 family protein)"	yhgA CDS (transposase_31 family protein):c.844G>C	yhgA CDS (transposase_31 family protein):p.Val282Leu
BAP1_deltaBioH-MatBC mapping	3620280	SNV	1	A	G		Homozygous	82	82	100	0.46	33.77	Gene: "yiaU gene", CDS: "yiaU CDS (putative DNA-binding transcriptional regulator)"	yiaU CDS (putative DNA-binding transcriptional regulator):c.953A>G	yiaU CDS (putative DNA-binding transcriptional regulator):p.Gln318Arg
BAP1_deltaBioH-MatBC mapping	3968749	SNV	1	A	G		Homozygous	92	94	97.87	0.49	34.85	Gene: "yihL gene", CDS: "yihL CDS (putative DNA-binding transcriptional regulator)"	yihL CDS (putative DNA-binding transcriptional regulator):c.658A>G	yihL CDS (putative DNA-binding transcriptional regulator):p.Ile220Val
BAP1_deltaBioH-MatBC mapping	3982981	SNV	1	A	G		Homozygous	105	105	100	0.48	33.41	Gene: "yihW gene", CDS: "yihW CDS (putative transcriptional regulator for sulfoquinovose utilization)"	yihW CDS (putative transcriptional regulator for sulfoquinovose utilization):c.779A>G	yihW CDS (putative transcriptional regulator for sulfoquinovose utilization):p.Asp260Gly
BAP1_deltaBioH-MatBC mapping	4417390	Insertion	1	-	A		Homozygous	105	114	92.11	0.49	33.42	Gene: "yjhC gene", CDS: "yjhC CDS (GFO/IDH/MOCA family putative oxidoreductase NAD(P)-dependent)", Misc. feature: "phage-like element KpLE2"	yjhC CDS (GFO/IDH/MOCA family putative oxidoreductase NAD(P)-dependent):c.899_900insA	yjhC CDS (GFO/IDH/MOCA family putative oxidoreductase NAD(P)-dependent):p.Gly300fs
BAP1_deltaBioH-MatBC mapping	4475956	SNV	1	T	C		Homozygous	82	82	100	0.48	35.46	Gene: "yjiM gene", CDS: "yjiM CDS (putative 2-hydroxyglutaryl-CoA dehydratase)"	yjiM CDS (putative 2-hydroxyglutaryl-CoA dehydratase):c.121A>G	yjiM CDS (putative 2-hydroxyglutaryl-CoA dehydratase):p.Thr41Ala
BAP1_deltaBioH-MatBC mapping	3447291	SNV	1	T	C		Homozygous	108	109	99.08	0.48	35.16	Gene: "yrhA gene", CDS: "yrhA CDS (hypothetical protein)"	yrhA CDS (hypothetical protein):c.155T>C	yrhA CDS (hypothetical protein):p.Val52Ala
BAP1_deltaBioH-MatBC mapping	4674	SNV	1	G	A		Homozygous	87	87	100	0.48	34	Gene: "thrC gene", CDS: "thrC CDS (L-threonine synthase)"	thrC CDS (L-threonine synthase):c.942G>A
BAP1_deltaBioH-MatBC mapping	194696	SNV	1	A	G		Homozygous	110	110	100	0.47	34.2
BAP1_deltaBioH-MatBC mapping	463852	SNV	1	C	T		Homozygous	111	111	100	0.5	33.98
BAP1_deltaBioH-MatBC mapping	1263709	SNV	1	C	T		Homozygous	94	94	100	0.48	34.63	Gene: "narK gene", CDS: "narK CDS (nitrate/nitrite transporter)"	narK CDS (nitrate/nitrite transporter):c.732C>T
BAP1_deltaBioH-MatBC mapping	1314069	SNV	1	C	T		Homozygous	106	106	100	0.48	35.4
BAP1_deltaBioH-MatBC mapping	1381147	SNV	1	A	G		Homozygous	67	67	100	0.46	35.58	Gene: "fnr gene"
BAP1_deltaBioH-MatBC mapping	1853962	SNV	1	T	C		Homozygous	88	88	100	0.47	33.65	Gene: "yebQ gene", CDS: "yebQ CDS (putative transporter)"	yebQ CDS (putative transporter):c.1089T>C
BAP1_deltaBioH-MatBC mapping	2051065	SNV	1	G	A		Homozygous	101	101	100	0.47	34.76	Gene: "mdtB gene", CDS: "mdtB CDS (multidrug efflux system,_subunit B)"	mdtB CDS (multidrug efflux system, subunit B):c.9G>A
BAP1_deltaBioH-MatBC mapping	2696767	SNV	1	G	A		Homozygous	97	97	100	0.49	34.26	Gene: "pphB gene", CDS: "pphB CDS (serine/threonine-specific protein phosphatase 2)"	pphB CDS (serine/threonine-specific protein phosphatase 2):c.168G>A
BAP1_deltaBioH-MatBC mapping	2943091	SNV	1	G	A		Homozygous	103	103	100	0.45	33.85	Gene: "ECD_02814 gene", CDS: "ECD_02814 CDS (hypothetical protein)"	ECD_02814 CDS (hypothetical protein):c.555G>A
BAP1_deltaBioH-MatBC mapping	2985274	SNV	1	G	A		Homozygous	95	95	100	0.48	33.59
BAP1_deltaBioH-MatBC mapping	3018395	SNV	1	T	C		Homozygous	103	103	100	0.45	32.61	Gene: "yghB gene", CDS: "yghB CDS (general envelope maintenance protein; DedA family inner membrane protein; putative multidrug efflux transporter)"	yghB CDS (general envelope maintenance protein; DedA family inner membrane protein; putative multidrug efflux transporter):c.523T>C
BAP1_deltaBioH-MatBC mapping	3402999	SNV	1	C	A		Homozygous	94	94	100	0.5	32.62	Protein binding site: "lac operator"
BAP1_deltaBioH-MatBC mapping	3558436	SNV	1	T	C		Homozygous	94	94	100	0.5	34.79
BAP1_deltaBioH-MatBC mapping	4426944	SNV	1	C	T		Homozygous	96	96	100	0.49	33.22	Gene: "fecC gene", CDS: "fecC CDS (ferric citrate ABC transporter permease)", Misc. feature: "phage-like element KpLE2"	fecC CDS (ferric citrate ABC transporter permease):c.810G>A
BAP1_deltaBioH-MatBC mapping	1174401	SNV	1	T	C		Homozygous	112	113	99.12	0.47	34.83	Gene: "ycfT gene", CDS: "ycfT CDS (inner membrane protein)"	ycfT CDS (inner membrane protein):c.231A>G
BAP1_deltaBioH-MatBC mapping	945334	SNV	1	A	T		Homozygous	98	99	98.99	0.48	33.84	Gene: "dmsA gene", CDS: "dmsA CDS (dimethyl sulfoxide reductase,_anaerobic,_subunit A)"	dmsA CDS (dimethyl sulfoxide reductase, anaerobic, subunit A):c.2412A>T
BAP1_deltaBioH-MatBC mapping	605294	SNV	1	C	T		Homozygous	95	96	98.96	0.46	34.32	Gene: "citF gene", CDS: "citF CDS (citrate lyase,_citrate-ACP transferase (alpha) subunit)"	citF CDS (citrate lyase, citrate-ACP transferase (alpha) subunit):c.981G>A
BAP1_deltaBioH-MatBC mapping	1828773	SNV	1	C	T		Homozygous	95	96	98.96	0.46	35.14	Gene: "yeaX gene", CDS: "yeaX CDS (putative YeaWX dioxygenase beta subunit,_reductase component)"	yeaX CDS (putative YeaWX dioxygenase beta subunit, reductase component):c.330C>T
BAP1_deltaBioH-MatBC mapping	1478151	SNV	1	T	C		Homozygous	84	85	98.82	0.46	34.74
BAP1_deltaBioH-MatBC mapping	2224630	SNV	1	T	C		Homozygous	84	85	98.82	0.49	33.37	Gene: "gyrA gene", CDS: "gyrA CDS (DNA gyrase (type II topoisomerase),_subunit A)"	gyrA CDS (DNA gyrase (type II topoisomerase), subunit A):c.2025A>G
BAP1_deltaBioH-MatBC mapping	225647	SNV	1	A	G		Homozygous	79	80	98.75	0.46	34.47
BAP1_deltaBioH-MatBC mapping	1218166	SNV	1	A	C		Homozygous	76	77	98.7	0.49	35.45
BAP1_deltaBioH-MatBC mapping	4317512	Deletion	1	T	-		Homozygous	100	102	98.04	0.49	32.87
BAP1_deltaBioH-MatBC mapping	3401281	SNV	1	T	G		Homozygous	84	86	97.67	0.5	32.83
BAP1_deltaBioH-MatBC mapping	1703043	SNV	1	G	A		Homozygous	75	77	97.4	0.45	32.45	Gene: "sufD gene", CDS: "sufD CDS (component of SufBCD Fe-S cluster assembly scaffold)"	sufD CDS (component of SufBCD Fe-S cluster assembly scaffold):c.891C>T
BAP1_deltaBioH-MatBC mapping	1945126	SNV	1	G	A		Homozygous	80	83	96.39	0.46	34.94	Gene: "ECD_04329 gene", CDS: "ECD_04329 CDS (hypothetical protein)"	ECD_04329 CDS (hypothetical protein):c.186G>A
BAP1_deltaBioH-MatBC mapping	3401273	SNV	1	C	T		Homozygous	78	82	95.12	0.5	32.51	Gene: "yhgA gene", CDS: "yhgA CDS (transposase_31 family protein)"	yhgA CDS (transposase_31 family protein):c.873C>T
BAP1_deltaBioH-MatBC mapping	3021797	Deletion	1	C	-		Homozygous	91	96	94.79	0.43	31.75
BAP1_deltaBioH-MatBC mapping	3401295	Insertion	1	-	T		Homozygous	75	82	91.46	0.48	32.67
BAP1_deltaBioH-MatBC mapping	3753803	Insertion	1	-	A		Homozygous	78	92	84.78	0.49	33.6	Gene: "yidP gene"
BAP1_deltaBioH-MatBC mapping	2448867	Insertion	1	-	T		Homozygous	74	90	82.22	0.47	34.54

## Sheet: SK-5 colony 13
Mapping	Reference Position	Type	Length	Reference	Allele	Linkage	Zygosity	Count	Coverage	Frequency	Forward/reverse balance	Average quality	Overlapping annotations	Coding region change	Amino acid change
BAP1_deltaBioH-MatBC mapping	2042782	SNV	1	T	C		Homozygous	105	106	99.06	0.49	34.51	Gene: "alkA gene", CDS: "alkA CDS (3-methyl-adenine DNA glycosylase II)"	alkA CDS (3-methyl-adenine DNA glycosylase II):c.631A>G	alkA CDS (3-methyl-adenine DNA glycosylase II):p.Thr211Ala
BAP1_deltaBioH-MatBC mapping	511717	SNV	1	C	T		Homozygous	70	70	100	0.47	29.01	Gene: "allD gene", CDS: "allD CDS (ureidoglycolate dehydrogenase)"	allD CDS (ureidoglycolate dehydrogenase):c.665G>A	allD CDS (ureidoglycolate dehydrogenase):p.Gly222Glu
BAP1_deltaBioH-MatBC mapping	3512305	SNV	1	T	C		Homozygous	90	91	98.9	0.47	34.33	Gene: "arsB gene", CDS: "arsB CDS (arsenite/antimonite transporter)"	arsB CDS (arsenite/antimonite transporter):c.38T>C	arsB CDS (arsenite/antimonite transporter):p.Val13Ala
BAP1_deltaBioH-MatBC mapping	882392	Insertion	1	-	T		Homozygous	103	105	98.1	0.49	34.17	Gene: "ECD_00840 gene", CDS: "ECD_00840 CDS (hypothetical protein)", Misc. feature: "cryptic prophage,_186-like (REL606-specific)"	ECD_00840 CDS (hypothetical protein):c.402_403insA	ECD_00840 CDS (hypothetical protein):p.Leu135fs
BAP1_deltaBioH-MatBC mapping	2946540	SNV	1	G	A		Homozygous	71	71	100	0.46	34.13	Gene: "ECD_02817 gene", CDS: "ECD_02817 CDS (KpsU protein)"	ECD_02817 CDS (KpsU protein):c.55G>A	ECD_02817 CDS (KpsU protein):p.Gly19Ser
BAP1_deltaBioH-MatBC mapping	3914142	Deletion	1	C	-		Homozygous	86	86	100	0.45	35.2	Gene: "ECD_03713 gene", CDS: "ECD_03713 CDS (hypothetical protein)"	ECD_03713 CDS (hypothetical protein):c.134delG	ECD_03713 CDS (hypothetical protein):p.Gly45fs
BAP1_deltaBioH-MatBC mapping	3921580	SNV	1	C	T		Homozygous	109	110	99.09	0.47	32.63	Gene: "ECD_03721 gene", CDS: "ECD_03721 CDS (hypothetical protein)"	ECD_03721 CDS (hypothetical protein):c.956G>A	ECD_03721 CDS (hypothetical protein):p.Arg319His
BAP1_deltaBioH-MatBC mapping	2343705	SNV	1	C	T		Homozygous	102	103	99.03	0.42	33.73	Gene: "fadI gene", CDS: "fadI CDS (beta-ketoacyl-CoA thiolase,_anaerobic,_subunit)"	fadI CDS (beta-ketoacyl-CoA thiolase, anaerobic, subunit):c.963G>A	fadI CDS (beta-ketoacyl-CoA thiolase, anaerobic, subunit):p.Trp321*
BAP1_deltaBioH-MatBC mapping	3026483	SNV	1	T	C		Homozygous	59	61	96.72	0.44	34.29	Gene: "ftsP gene", CDS: "ftsP CDS (septal ring component that protects the divisome from stress; multicopy suppressor of ftsI(Ts))"	ftsP CDS (septal ring component that protects the divisome from stress; multicopy suppressor of ftsI(Ts)):c.497A>G	ftsP CDS (septal ring component that protects the divisome from stress; multicopy suppressor of ftsI(Ts)):p.Glu166Gly
BAP1_deltaBioH-MatBC mapping	2917039	SNV	1	T	C		Homozygous	86	89	96.63	0.48	33.79	Gene: "galP gene", CDS: "galP CDS (D-galactose transporter)"	galP CDS (D-galactose transporter):c.1025T>C	galP CDS (D-galactose transporter):p.Ile342Thr
BAP1_deltaBioH-MatBC mapping	4203180	SNV	1	T	A		Homozygous	73	73	100	0.48	34.37	Gene: "gltP gene", CDS: "gltP CDS (glutamate/aspartate:proton symporter)"	gltP CDS (glutamate/aspartate:proton symporter):c.341T>A	gltP CDS (glutamate/aspartate:proton symporter):p.Met114Lys
BAP1_deltaBioH-MatBC mapping	427365	SNV	1	A	C		Homozygous	103	103	100	0.5	34.08	Gene: "hupB gene", CDS: "hupB CDS (HU,_DNA-binding transcriptional regulator,_beta subunit)"	hupB CDS (HU, DNA-binding transcriptional regulator, beta subunit):c.8A>C	hupB CDS (HU, DNA-binding transcriptional regulator, beta subunit):p.Lys3Thr
BAP1_deltaBioH-MatBC mapping	1036489	SNV	1	C	T		Homozygous	76	76	100	0.46	34.61	Gene: "hyaB gene", CDS: "hyaB CDS (hydrogenase 1,_large subunit)"	hyaB CDS (hydrogenase 1, large subunit):c.1274C>T	hyaB CDS (hydrogenase 1, large subunit):p.Ala425Val
BAP1_deltaBioH-MatBC mapping	4485777	Deletion	1	T	-		Homozygous	99	101	98.02	0.48	35.85	Gene: "mcrB gene", CDS: "mcrB CDS (5-methylcytosine-specific restriction enzyme McrBC,_subunit McrB)"	mcrB CDS (5-methylcytosine-specific restriction enzyme McrBC, subunit McrB):c.818delA	mcrB CDS (5-methylcytosine-specific restriction enzyme McrBC, subunit McrB):p.Lys273fs
BAP1_deltaBioH-MatBC mapping	1021862	SNV	1	G	A		Homozygous	73	74	98.65	0.42	34.74	Gene: "ompA gene", CDS: "ompA CDS (outer membrane protein A (3a;II*;G;d))"	ompA CDS (outer membrane protein A (3a;II*;G;d)):c.154C>T	ompA CDS (outer membrane protein A (3a;II*;G;d)):p.His52Tyr
BAP1_deltaBioH-MatBC mapping	4518118	SNV	1	C	T		Homozygous	94	95	98.95	0.49	33.86	Gene: "opgB gene", CDS: "opgB CDS (OPG periplasmic biosynthetic phosphoglycerol transferases I (membrane-bound) and II (soluble))"	opgB CDS (OPG periplasmic biosynthetic phosphoglycerol transferases I (membrane-bound) and II (soluble)):c.646G>A	opgB CDS (OPG periplasmic biosynthetic phosphoglycerol transferases I (membrane-bound) and II (soluble)):p.Val216Met
BAP1_deltaBioH-MatBC mapping	899223	SNV	1	T	C		Homozygous	55	55	100	0.47	35.07	Gene: "potI gene", CDS: "potI CDS (putrescine ABC transporter permease)"	potI CDS (putrescine ABC transporter permease):c.563T>C	potI CDS (putrescine ABC transporter permease):p.Ile188Thr
BAP1_deltaBioH-MatBC mapping	1526466	SNV	1	A	G		Homozygous	104	106	98.11	0.47	32.17	Gene: "pqqL gene", CDS: "pqqL CDS (putative periplasmic M16 family zinc metalloendopeptidase)"	pqqL CDS (putative periplasmic M16 family zinc metalloendopeptidase):c.1091T>C	pqqL CDS (putative periplasmic M16 family zinc metalloendopeptidase):p.Leu364Ser
BAP1_deltaBioH-MatBC mapping	2617681	SNV	1	T	C		Homozygous	70	71	98.59	0.47	33.2	Gene: "ratA gene", CDS: "ratA CDS (toxic UPF0083 family protein inhibitor of 70S ribosome formation)"	ratA CDS (toxic UPF0083 family protein inhibitor of 70S ribosome formation):c.359A>G	ratA CDS (toxic UPF0083 family protein inhibitor of 70S ribosome formation):p.Asp120Gly
BAP1_deltaBioH-MatBC mapping	2659431	SNV	1	A	T		Homozygous	101	104	97.12	0.5	34.4	Gene: "recX gene", CDS: "recX CDS (regulatory protein for RecA)"	recX CDS (regulatory protein for RecA):c.48T>A	recX CDS (regulatory protein for RecA):p.Asp16Glu
BAP1_deltaBioH-MatBC mapping	2609164	SNV	1	A	G		Homozygous	78	79	98.73	0.47	33.86	Gene: "rimM gene", CDS: "rimM CDS (ribosome maturation factor)"	rimM CDS (ribosome maturation factor):c.142T>C	rimM CDS (ribosome maturation factor):p.Phe48Leu
BAP1_deltaBioH-MatBC mapping	2504837	SNV	1	T	C		Homozygous	68	68	100	0.49	34.03	Gene: "rlmN gene", CDS: "rlmN CDS (dual specificity 23S rRNA m(2)A2503,_tRNA m(2)A37 methyltransferase,_SAM-dependent)"	rlmN CDS (dual specificity 23S rRNA m(2)A2503, tRNA m(2)A37 methyltransferase, SAM-dependent):c.800A>G	rlmN CDS (dual specificity 23S rRNA m(2)A2503, tRNA m(2)A37 methyltransferase, SAM-dependent):p.Lys267Arg
BAP1_deltaBioH-MatBC mapping	1071334	SNV	1	A	G		Homozygous	73	74	98.65	0.44	31.18	Gene: "rutF gene", CDS: "rutF CDS (flavin:NADH reductase)"	rutF CDS (flavin:NADH reductase):c.176T>C	rutF CDS (flavin:NADH reductase):p.Val59Ala
BAP1_deltaBioH-MatBC mapping	998968	SNV	1	C	A		Homozygous	91	93	97.85	0.44	33.82	Gene: "ssuE gene", CDS: "ssuE CDS (NAD(P)H-dependent FMN reductase)"	ssuE CDS (NAD(P)H-dependent FMN reductase):c.507G>T	ssuE CDS (NAD(P)H-dependent FMN reductase):p.Trp169Cys
BAP1_deltaBioH-MatBC mapping	2635057	Insertion	1	-	T		Homozygous	87	93	93.55	0.49	34.49	Gene: "stpA gene", CDS: "stpA CDS (DNA binding protein,_nucleoid-associated)"	stpA CDS (DNA binding protein, nucleoid-associated):c.172_173insA	stpA CDS (DNA binding protein, nucleoid-associated):p.Ile58fs
BAP1_deltaBioH-MatBC mapping	2440458	SNV	1	A	G		Homozygous	70	70	100	0.5	34.67	Gene: "talA gene", CDS: "talA CDS (transaldolase A)"	talA CDS (transaldolase A):c.431A>G	talA CDS (transaldolase A):p.Glu144Gly
BAP1_deltaBioH-MatBC mapping	2442522	SNV	1	C	A		Homozygous	91	92	98.91	0.47	34.3	Gene: "tktB gene", CDS: "tktB CDS (transketolase 2,_thiamine triphosphate-binding)"	tktB CDS (transketolase 2, thiamine triphosphate-binding):c.1525C>A	tktB CDS (transketolase 2, thiamine triphosphate-binding):p.His509Asn
BAP1_deltaBioH-MatBC mapping	731876	SNV	1	G	A		Homozygous	106	106	100	0.46	34.88	Gene: "tolA gene", CDS: "tolA CDS (membrane anchored protein in TolA-TolQ-TolR complex)"	tolA CDS (membrane anchored protein in TolA-TolQ-TolR complex):c.1G>A	tolA CDS (membrane anchored protein in TolA-TolQ-TolR complex):p.Val1Met
BAP1_deltaBioH-MatBC mapping	237789	Deletion	1	G	-		Homozygous	74	76	97.37	0.47	31.31	Gene: "yafS gene", CDS: "yafS CDS (putative S-adenosyl-L-methionine-dependent methyltransferase)"	yafS CDS (putative S-adenosyl-L-methionine-dependent methyltransferase):c.47delG	yafS CDS (putative S-adenosyl-L-methionine-dependent methyltransferase):p.Trp16fs
BAP1_deltaBioH-MatBC mapping	974174	SNV	1	G	A		Homozygous	97	98	98.98	0.49	35.14	Gene: "ycbJ gene", CDS: "ycbJ CDS (protein kinase-like domain protein)"	ycbJ CDS (protein kinase-like domain protein):c.460G>A	ycbJ CDS (protein kinase-like domain protein):p.Val154Met
BAP1_deltaBioH-MatBC mapping	1355826	SNV	1	A	G		Homozygous	88	89	98.88	0.48	34.92	Gene: "ycjN gene", CDS: "ycjN CDS (putative ABC sugar transporter periplasmic binding protein)"	ycjN CDS (putative ABC sugar transporter periplasmic binding protein):c.679A>G	ycjN CDS (putative ABC sugar transporter periplasmic binding protein):p.Met227Val
BAP1_deltaBioH-MatBC mapping	1459094	SNV	1	G	A		Homozygous	97	100	97	0.49	34.69	Gene: "ydcP gene", CDS: "ydcP CDS (putative peptidase)"	ydcP CDS (putative peptidase):c.1378G>A	ydcP CDS (putative peptidase):p.Gly460Ser
BAP1_deltaBioH-MatBC mapping	2034539	SNV	1	T	C		Homozygous	75	76	98.68	0.48	34.17	Gene: "yegH gene", CDS: "yegH CDS (inner membrane protein)"	yegH CDS (inner membrane protein):c.758T>C	yegH CDS (inner membrane protein):p.Val253Ala
BAP1_deltaBioH-MatBC mapping	2928999	SNV	1	T	C		Homozygous	105	106	99.06	0.49	35.07	Gene: "yggN gene", CDS: "yggN CDS (DUF2884 family putative periplasmic protein)"	yggN CDS (DUF2884 family putative periplasmic protein):c.266A>G	yggN CDS (DUF2884 family putative periplasmic protein):p.Glu89Gly
BAP1_deltaBioH-MatBC mapping	3401244	SNV	1	G	C		Homozygous	105	105	100	0.5	33.85	Gene: "yhgA gene", CDS: "yhgA CDS (transposase_31 family protein)"	yhgA CDS (transposase_31 family protein):c.844G>C	yhgA CDS (transposase_31 family protein):p.Val282Leu
BAP1_deltaBioH-MatBC mapping	3620280	SNV	1	A	G		Homozygous	115	115	100	0.46	33.76	Gene: "yiaU gene", CDS: "yiaU CDS (putative DNA-binding transcriptional regulator)"	yiaU CDS (putative DNA-binding transcriptional regulator):c.953A>G	yiaU CDS (putative DNA-binding transcriptional regulator):p.Gln318Arg
BAP1_deltaBioH-MatBC mapping	3968749	SNV	1	A	G		Homozygous	87	87	100	0.49	34.79	Gene: "yihL gene", CDS: "yihL CDS (putative DNA-binding transcriptional regulator)"	yihL CDS (putative DNA-binding transcriptional regulator):c.658A>G	yihL CDS (putative DNA-binding transcriptional regulator):p.Ile220Val
BAP1_deltaBioH-MatBC mapping	3982981	SNV	1	A	G		Homozygous	69	71	97.18	0.49	32.87	Gene: "yihW gene", CDS: "yihW CDS (putative transcriptional regulator for sulfoquinovose utilization)"	yihW CDS (putative transcriptional regulator for sulfoquinovose utilization):c.779A>G	yihW CDS (putative transcriptional regulator for sulfoquinovose utilization):p.Asp260Gly
BAP1_deltaBioH-MatBC mapping	4417390	Insertion	1	-	A		Homozygous	85	98	86.73	0.46	33.71	Gene: "yjhC gene", CDS: "yjhC CDS (GFO/IDH/MOCA family putative oxidoreductase NAD(P)-dependent)", Misc. feature: "phage-like element KpLE2"	yjhC CDS (GFO/IDH/MOCA family putative oxidoreductase NAD(P)-dependent):c.899_900insA	yjhC CDS (GFO/IDH/MOCA family putative oxidoreductase NAD(P)-dependent):p.Gly300fs
BAP1_deltaBioH-MatBC mapping	4475956	SNV	1	T	C		Homozygous	95	95	100	0.47	34.2	Gene: "yjiM gene", CDS: "yjiM CDS (putative 2-hydroxyglutaryl-CoA dehydratase)"	yjiM CDS (putative 2-hydroxyglutaryl-CoA dehydratase):c.121A>G	yjiM CDS (putative 2-hydroxyglutaryl-CoA dehydratase):p.Thr41Ala
BAP1_deltaBioH-MatBC mapping	4674	SNV	1	G	A		Homozygous	93	93	100	0.46	35.1	Gene: "thrC gene", CDS: "thrC CDS (L-threonine synthase)"	thrC CDS (L-threonine synthase):c.942G>A
BAP1_deltaBioH-MatBC mapping	194696	SNV	1	A	G		Homozygous	101	101	100	0.47	35.34
BAP1_deltaBioH-MatBC mapping	225647	SNV	1	A	G		Homozygous	112	112	100	0.47	34.91
BAP1_deltaBioH-MatBC mapping	463852	SNV	1	C	T		Homozygous	79	79	100	0.49	33.16
BAP1_deltaBioH-MatBC mapping	605294	SNV	1	C	T		Homozygous	89	89	100	0.47	34.24	Gene: "citF gene", CDS: "citF CDS (citrate lyase,_citrate-ACP transferase (alpha) subunit)"	citF CDS (citrate lyase, citrate-ACP transferase (alpha) subunit):c.981G>A
BAP1_deltaBioH-MatBC mapping	945334	SNV	1	A	T		Homozygous	87	87	100	0.46	32.99	Gene: "dmsA gene", CDS: "dmsA CDS (dimethyl sulfoxide reductase,_anaerobic,_subunit A)"	dmsA CDS (dimethyl sulfoxide reductase, anaerobic, subunit A):c.2412A>T
BAP1_deltaBioH-MatBC mapping	1218166	SNV	1	A	C		Homozygous	63	63	100	0.48	33.78
BAP1_deltaBioH-MatBC mapping	1263709	SNV	1	C	T		Homozygous	101	101	100	0.48	34.44	Gene: "narK gene", CDS: "narK CDS (nitrate/nitrite transporter)"	narK CDS (nitrate/nitrite transporter):c.732C>T
BAP1_deltaBioH-MatBC mapping	1314069	SNV	1	C	T		Homozygous	100	100	100	0.47	35.53
BAP1_deltaBioH-MatBC mapping	1381146	SNV	1	T	C		Homozygous	108	108	100	0.49	34.58	Gene: "fnr gene"
BAP1_deltaBioH-MatBC mapping	1828773	SNV	1	C	T		Homozygous	102	102	100	0.48	34.36	Gene: "yeaX gene", CDS: "yeaX CDS (putative YeaWX dioxygenase beta subunit,_reductase component)"	yeaX CDS (putative YeaWX dioxygenase beta subunit, reductase component):c.330C>T
BAP1_deltaBioH-MatBC mapping	1853962	SNV	1	T	C		Homozygous	79	79	100	0.48	34.29	Gene: "yebQ gene", CDS: "yebQ CDS (putative transporter)"	yebQ CDS (putative transporter):c.1089T>C
BAP1_deltaBioH-MatBC mapping	2051065	SNV	1	G	A		Homozygous	96	96	100	0.49	34.18	Gene: "mdtB gene", CDS: "mdtB CDS (multidrug efflux system,_subunit B)"	mdtB CDS (multidrug efflux system, subunit B):c.9G>A
BAP1_deltaBioH-MatBC mapping	3018395	SNV	1	T	C		Homozygous	83	83	100	0.46	34.24	Gene: "yghB gene", CDS: "yghB CDS (general envelope maintenance protein; DedA family inner membrane protein; putative multidrug efflux transporter)"	yghB CDS (general envelope maintenance protein; DedA family inner membrane protein; putative multidrug efflux transporter):c.523T>C
BAP1_deltaBioH-MatBC mapping	3021797	Deletion	1	C	-		Homozygous	84	84	100	0.5	33.15
BAP1_deltaBioH-MatBC mapping	3401273	SNV	1	C	T		Homozygous	111	111	100	0.5	32.9	Gene: "yhgA gene", CDS: "yhgA CDS (transposase_31 family protein)"	yhgA CDS (transposase_31 family protein):c.873C>T
BAP1_deltaBioH-MatBC mapping	3401281	SNV	1	T	G		Homozygous	119	119	100	0.49	33.99
BAP1_deltaBioH-MatBC mapping	3558436	SNV	1	T	C		Homozygous	88	88	100	0.47	33.85
BAP1_deltaBioH-MatBC mapping	4426944	SNV	1	C	T		Homozygous	83	83	100	0.49	34.36	Gene: "fecC gene", CDS: "fecC CDS (ferric citrate ABC transporter permease)", Misc. feature: "phage-like element KpLE2"	fecC CDS (ferric citrate ABC transporter permease):c.810G>A
BAP1_deltaBioH-MatBC mapping	2696767	SNV	1	G	A		Homozygous	110	111	99.1	0.49	31.4	Gene: "pphB gene", CDS: "pphB CDS (serine/threonine-specific protein phosphatase 2)"	pphB CDS (serine/threonine-specific protein phosphatase 2):c.168G>A
BAP1_deltaBioH-MatBC mapping	2224630	SNV	1	T	C		Homozygous	108	109	99.08	0.49	34.55	Gene: "gyrA gene", CDS: "gyrA CDS (DNA gyrase (type II topoisomerase),_subunit A)"	gyrA CDS (DNA gyrase (type II topoisomerase), subunit A):c.2025A>G
BAP1_deltaBioH-MatBC mapping	1945126	SNV	1	G	A		Homozygous	92	93	98.92	0.5	34.72	Gene: "ECD_04329 gene", CDS: "ECD_04329 CDS (hypothetical protein)"	ECD_04329 CDS (hypothetical protein):c.186G>A
BAP1_deltaBioH-MatBC mapping	2943091	SNV	1	G	A		Homozygous	92	93	98.92	0.5	33.07	Gene: "ECD_02814 gene", CDS: "ECD_02814 CDS (hypothetical protein)"	ECD_02814 CDS (hypothetical protein):c.555G>A
BAP1_deltaBioH-MatBC mapping	3402999	SNV	1	C	A		Homozygous	91	92	98.91	0.49	32.49	Protein binding site: "lac operator"
BAP1_deltaBioH-MatBC mapping	1703043	SNV	1	G	A		Homozygous	86	87	98.85	0.48	33.51	Gene: "sufD gene", CDS: "sufD CDS (component of SufBCD Fe-S cluster assembly scaffold)"	sufD CDS (component of SufBCD Fe-S cluster assembly scaffold):c.891C>T
BAP1_deltaBioH-MatBC mapping	2985274	SNV	1	G	A		Homozygous	109	111	98.2	0.5	33.5
BAP1_deltaBioH-MatBC mapping	3401295	Insertion	1	-	T		Homozygous	118	121	97.52	0.48	34.31
BAP1_deltaBioH-MatBC mapping	3753803	Insertion	1	-	A		Homozygous	109	115	94.78	0.5	34.42	Gene: "yidP gene"

## Sheet: SK-6 colony 15
Mapping	Reference Position	Type	Length	Reference	Allele	Linkage	Zygosity	Count	Coverage	Frequency	Forward/reverse balance	Average quality	Overlapping annotations	Coding region change	Amino acid change
BAP1_deltaBioH-MatBC mapping	3150976	SNV	1	A	G		Homozygous	102	103	99.03	0.49	32.66	Gene: "agaD gene", CDS: "agaD CDS (N-acetylgalactosamine-specific enzyme IID component of PTS)"	agaD CDS (N-acetylgalactosamine-specific enzyme IID component of PTS):c.128A>G	agaD CDS (N-acetylgalactosamine-specific enzyme IID component of PTS):p.Lys43Arg
BAP1_deltaBioH-MatBC mapping	2042782	SNV	1	T	C		Homozygous	105	106	99.06	0.49	34.19	Gene: "alkA gene", CDS: "alkA CDS (3-methyl-adenine DNA glycosylase II)"	alkA CDS (3-methyl-adenine DNA glycosylase II):c.631A>G	alkA CDS (3-methyl-adenine DNA glycosylase II):p.Thr211Ala
BAP1_deltaBioH-MatBC mapping	299992	SNV	1	G	T		Homozygous	87	87	100	0.47	33.93	Gene: "betT gene", CDS: "betT CDS (choline transporter of high affinity)"	betT CDS (choline transporter of high affinity):c.902G>T	betT CDS (choline transporter of high affinity):p.Gly301Val
BAP1_deltaBioH-MatBC mapping	876957	Deletion	1	C	-		Homozygous	73	75	97.33	0.45	33.77	Gene: "ECD_00832 gene", CDS: "ECD_00832 CDS (putative capsid portal protein)", Misc. feature: "cryptic prophage,_186-like (REL606-specific)"	ECD_00832 CDS (putative capsid portal protein):c.900delG	ECD_00832 CDS (putative capsid portal protein):p.Gly300fs
BAP1_deltaBioH-MatBC mapping	3720848	SNV	1	C	T		Homozygous	89	90	98.89	0.48	34.75	Gene: "ECD_03531 gene", CDS: "ECD_03531 CDS (hypothetical protein)"	ECD_03531 CDS (hypothetical protein):c.3226C>T	ECD_03531 CDS (hypothetical protein):p.Leu1076Phe
BAP1_deltaBioH-MatBC mapping	3721862	SNV	1	C	T		Homozygous	77	77	100	0.47	33.99	Gene: "ECD_03533 gene", CDS: "ECD_03533 CDS (hypothetical protein)"	ECD_03533 CDS (hypothetical protein):c.76G>A	ECD_03533 CDS (hypothetical protein):p.Glu26Lys
BAP1_deltaBioH-MatBC mapping	2360868	Deletion	1	A	-		Homozygous	128	132	96.97	0.48	31.04	Gene: "evgS gene", CDS: "evgS CDS (hybrid sensory histidine kinase in two-component regulatory system with EvgA)"	evgS CDS (hybrid sensory histidine kinase in two-component regulatory system with EvgA):c.1734delA	evgS CDS (hybrid sensory histidine kinase in two-component regulatory system with EvgA):p.Arg578fs
BAP1_deltaBioH-MatBC mapping	1725931	SNV	1	C	T		Homozygous	129	131	98.47	0.5	33.36	Gene: "fadK gene", CDS: "fadK CDS (short chain acyl-CoA synthetase,_anaerobic)"	fadK CDS (short chain acyl-CoA synthetase, anaerobic):c.1612C>T	fadK CDS (short chain acyl-CoA synthetase, anaerobic):p.Arg538Trp
BAP1_deltaBioH-MatBC mapping	1905959	SNV	1	A	G		Homozygous	94	95	98.95	0.47	33.77	Gene: "flhA gene", CDS: "flhA CDS (putative flagellar export pore protein)"	flhA CDS (putative flagellar export pore protein):c.1883T>C	flhA CDS (putative flagellar export pore protein):p.Leu628Ser
BAP1_deltaBioH-MatBC mapping	3026483	SNV	1	T	C		Homozygous	97	98	98.98	0.47	34.41	Gene: "ftsP gene", CDS: "ftsP CDS (septal ring component that protects the divisome from stress; multicopy suppressor of ftsI(Ts))"	ftsP CDS (septal ring component that protects the divisome from stress; multicopy suppressor of ftsI(Ts)):c.497A>G	ftsP CDS (septal ring component that protects the divisome from stress; multicopy suppressor of ftsI(Ts)):p.Glu166Gly
BAP1_deltaBioH-MatBC mapping	2917039	SNV	1	T	C		Homozygous	80	81	98.77	0.44	34.79	Gene: "galP gene", CDS: "galP CDS (D-galactose transporter)"	galP CDS (D-galactose transporter):c.1025T>C	galP CDS (D-galactose transporter):p.Ile342Thr
BAP1_deltaBioH-MatBC mapping	4203180	SNV	1	T	A		Homozygous	122	123	99.19	0.5	34.41	Gene: "gltP gene", CDS: "gltP CDS (glutamate/aspartate:proton symporter)"	gltP CDS (glutamate/aspartate:proton symporter):c.341T>A	gltP CDS (glutamate/aspartate:proton symporter):p.Met114Lys
BAP1_deltaBioH-MatBC mapping	427365	SNV	1	A	C		Homozygous	110	111	99.1	0.46	33.52	Gene: "hupB gene", CDS: "hupB CDS (HU,_DNA-binding transcriptional regulator,_beta subunit)"	hupB CDS (HU, DNA-binding transcriptional regulator, beta subunit):c.8A>C	hupB CDS (HU, DNA-binding transcriptional regulator, beta subunit):p.Lys3Thr
BAP1_deltaBioH-MatBC mapping	1036489	SNV	1	C	T		Homozygous	113	113	100	0.46	33.92	Gene: "hyaB gene", CDS: "hyaB CDS (hydrogenase 1,_large subunit)"	hyaB CDS (hydrogenase 1, large subunit):c.1274C>T	hyaB CDS (hydrogenase 1, large subunit):p.Ala425Val
BAP1_deltaBioH-MatBC mapping	2397642	SNV	1	C	T		Homozygous	85	87	97.7	0.48	34.41	Gene: "ligA gene", CDS: "ligA CDS (DNA ligase,_NAD(+)-dependent)"	ligA CDS (DNA ligase, NAD(+)-dependent):c.1795G>A	ligA CDS (DNA ligase, NAD(+)-dependent):p.Ala599Thr
BAP1_deltaBioH-MatBC mapping	4373559	SNV	1	A	G		Homozygous	99	100	99	0.45	32.47	Gene: "nrdD gene", CDS: "nrdD CDS (anaerobic ribonucleoside-triphosphate reductase)"	nrdD CDS (anaerobic ribonucleoside-triphosphate reductase):c.1691T>C	nrdD CDS (anaerobic ribonucleoside-triphosphate reductase):p.Val564Ala
BAP1_deltaBioH-MatBC mapping	2934041	SNV	1	G	A		Homozygous	101	104	97.12	0.48	35.12	Gene: "nupG gene", CDS: "nupG CDS (nucleoside transporter)"	nupG CDS (nucleoside transporter):c.687G>A	nupG CDS (nucleoside transporter):p.Met229Ile
BAP1_deltaBioH-MatBC mapping	3182450	SNV	1	A	G		Homozygous	109	111	98.2	0.49	33.65	Gene: "nusA gene", CDS: "nusA CDS (transcription termination/antitermination L factor)"	nusA CDS (transcription termination/antitermination L factor):c.449T>C	nusA CDS (transcription termination/antitermination L factor):p.Ile150Thr
BAP1_deltaBioH-MatBC mapping	1021862	SNV	1	G	A		Homozygous	107	107	100	0.49	33.5	Gene: "ompA gene", CDS: "ompA CDS (outer membrane protein A (3a;II*;G;d))"	ompA CDS (outer membrane protein A (3a;II*;G;d)):c.154C>T	ompA CDS (outer membrane protein A (3a;II*;G;d)):p.His52Tyr
BAP1_deltaBioH-MatBC mapping	4518118	SNV	1	C	T		Homozygous	86	86	100	0.48	34.86	Gene: "opgB gene", CDS: "opgB CDS (OPG periplasmic biosynthetic phosphoglycerol transferases I (membrane-bound) and II (soluble))"	opgB CDS (OPG periplasmic biosynthetic phosphoglycerol transferases I (membrane-bound) and II (soluble)):c.646G>A	opgB CDS (OPG periplasmic biosynthetic phosphoglycerol transferases I (membrane-bound) and II (soluble)):p.Val216Met
BAP1_deltaBioH-MatBC mapping	2366432	SNV	1	C	T		Homozygous	114	116	98.28	0.47	34.21	Gene: "oxc gene", CDS: "oxc CDS (oxalyl CoA decarboxylase,_ThDP-dependent)"	oxc CDS (oxalyl CoA decarboxylase, ThDP-dependent):c.280G>A	oxc CDS (oxalyl CoA decarboxylase, ThDP-dependent):p.Val94Ile
BAP1_deltaBioH-MatBC mapping	3082696	SNV	1	A	G		Homozygous	92	92	100	0.48	32.84	Gene: "patA gene", CDS: "patA CDS (putrescine:2-oxoglutaric acid aminotransferase,_PLP-dependent)"	patA CDS (putrescine:2-oxoglutaric acid aminotransferase, PLP-dependent):c.248A>G	patA CDS (putrescine:2-oxoglutaric acid aminotransferase, PLP-dependent):p.Glu83Gly
BAP1_deltaBioH-MatBC mapping	899223	SNV	1	T	C		Homozygous	58	59	98.31	0.48	32.55	Gene: "potI gene", CDS: "potI CDS (putrescine ABC transporter permease)"	potI CDS (putrescine ABC transporter permease):c.563T>C	potI CDS (putrescine ABC transporter permease):p.Ile188Thr
BAP1_deltaBioH-MatBC mapping	1526466	SNV	1	A	G		Homozygous	96	98	97.96	0.47	32.45	Gene: "pqqL gene", CDS: "pqqL CDS (putative periplasmic M16 family zinc metalloendopeptidase)"	pqqL CDS (putative periplasmic M16 family zinc metalloendopeptidase):c.1091T>C	pqqL CDS (putative periplasmic M16 family zinc metalloendopeptidase):p.Leu364Ser
BAP1_deltaBioH-MatBC mapping	2609164	SNV	1	A	G		Homozygous	78	81	96.3	0.47	32.55	Gene: "rimM gene", CDS: "rimM CDS (ribosome maturation factor)"	rimM CDS (ribosome maturation factor):c.142T>C	rimM CDS (ribosome maturation factor):p.Phe48Leu
BAP1_deltaBioH-MatBC mapping	2504837	SNV	1	T	C		Homozygous	91	92	98.91	0.49	33.86	Gene: "rlmN gene", CDS: "rlmN CDS (dual specificity 23S rRNA m(2)A2503,_tRNA m(2)A37 methyltransferase,_SAM-dependent)"	rlmN CDS (dual specificity 23S rRNA m(2)A2503, tRNA m(2)A37 methyltransferase, SAM-dependent):c.800A>G	rlmN CDS (dual specificity 23S rRNA m(2)A2503, tRNA m(2)A37 methyltransferase, SAM-dependent):p.Lys267Arg
BAP1_deltaBioH-MatBC mapping	621360	SNV	1	G	A		Homozygous	103	104	99.04	0.47	34.36	Gene: "rlpA gene", CDS: "rlpA CDS (septal ring protein,_suppressor of prc,_minor lipoprotein)"	rlpA CDS (septal ring protein, suppressor of prc, minor lipoprotein):c.1067C>T	rlpA CDS (septal ring protein, suppressor of prc, minor lipoprotein):p.Ser356Leu
BAP1_deltaBioH-MatBC mapping	4138808	SNV	1	T	C		Homozygous	88	89	98.88	0.49	33.94	Gene: "rluF gene", CDS: "rluF CDS (23S rRNA pseudouridine(2604) synthase)"	rluF CDS (23S rRNA pseudouridine(2604) synthase):c.137T>C	rluF CDS (23S rRNA pseudouridine(2604) synthase):p.Val46Ala
BAP1_deltaBioH-MatBC mapping	1071334	SNV	1	A	G		Homozygous	84	84	100	0.5	34.63	Gene: "rutF gene", CDS: "rutF CDS (flavin:NADH reductase)"	rutF CDS (flavin:NADH reductase):c.176T>C	rutF CDS (flavin:NADH reductase):p.Val59Ala
BAP1_deltaBioH-MatBC mapping	998968	SNV	1	C	A		Homozygous	64	65	98.46	0.48	33.03	Gene: "ssuE gene", CDS: "ssuE CDS (NAD(P)H-dependent FMN reductase)"	ssuE CDS (NAD(P)H-dependent FMN reductase):c.507G>T	ssuE CDS (NAD(P)H-dependent FMN reductase):p.Trp169Cys
BAP1_deltaBioH-MatBC mapping	2078974	SNV	1	C	T		Homozygous	88	88	100	0.48	34.56	Gene: "thiD gene", CDS: "thiD CDS (hydroxy-methylpyrimidine kinase and hydroxy-phosphomethylpyrimidine kinase)"	thiD CDS (hydroxy-methylpyrimidine kinase and hydroxy-phosphomethylpyrimidine kinase):c.211G>A	thiD CDS (hydroxy-methylpyrimidine kinase and hydroxy-phosphomethylpyrimidine kinase):p.Val71Met
BAP1_deltaBioH-MatBC mapping	731876	SNV	1	G	A		Homozygous	85	88	96.59	0.45	34.67	Gene: "tolA gene", CDS: "tolA CDS (membrane anchored protein in TolA-TolQ-TolR complex)"	tolA CDS (membrane anchored protein in TolA-TolQ-TolR complex):c.1G>A	tolA CDS (membrane anchored protein in TolA-TolQ-TolR complex):p.Val1Met
BAP1_deltaBioH-MatBC mapping	1232364	Deletion	1	T	-		Homozygous	88	91	96.7	0.49	34.27	Gene: "treA gene", CDS: "treA CDS (periplasmic trehalase)"	treA CDS (periplasmic trehalase):c.34delA	treA CDS (periplasmic trehalase):p.Met12fs
BAP1_deltaBioH-MatBC mapping	4180907	SNV	1	C	T		Homozygous	112	113	99.12	0.5	33.13	Gene: "uvrA gene", CDS: "uvrA CDS (ATPase and DNA damage recognition protein of nucleotide excision repair excinuclease UvrABC)"	uvrA CDS (ATPase and DNA damage recognition protein of nucleotide excision repair excinuclease UvrABC):c.1321G>A	uvrA CDS (ATPase and DNA damage recognition protein of nucleotide excision repair excinuclease UvrABC):p.Glu441Lys
BAP1_deltaBioH-MatBC mapping	2829841	SNV	1	G	A		Homozygous	69	70	98.57	0.45	34.55	Gene: "xdhA gene", CDS: "xdhA CDS (xanthine dehydrogenase,_molybdenum binding subunit)"	xdhA CDS (xanthine dehydrogenase, molybdenum binding subunit):c.1762G>A	xdhA CDS (xanthine dehydrogenase, molybdenum binding subunit):p.Gly588Arg
BAP1_deltaBioH-MatBC mapping	2828273	SNV	1	T	C		Homozygous	86	86	100	0.49	34.15	Gene: "xdhA gene", CDS: "xdhA CDS (xanthine dehydrogenase,_molybdenum binding subunit)"	xdhA CDS (xanthine dehydrogenase, molybdenum binding subunit):c.194T>C	xdhA CDS (xanthine dehydrogenase, molybdenum binding subunit):p.Ile65Thr
BAP1_deltaBioH-MatBC mapping	865787	SNV	1	A	G		Homozygous	96	96	100	0.49	35.44	Gene: "ybjH gene", CDS: "ybjH CDS (uncharacterized protein)"	ybjH CDS (uncharacterized protein):c.236T>C	ybjH CDS (uncharacterized protein):p.Val79Ala
BAP1_deltaBioH-MatBC mapping	894857	SNV	1	G	A		Homozygous	105	105	100	0.48	34.96	Gene: "ybjN gene", CDS: "ybjN CDS (negative regulator of motility; multicopy suppressor of coaA(Ts))"	ybjN CDS (negative regulator of motility; multicopy suppressor of coaA(Ts)):c.324G>A	ybjN CDS (negative regulator of motility; multicopy suppressor of coaA(Ts)):p.Met108Ile
BAP1_deltaBioH-MatBC mapping	974174	SNV	1	G	A		Homozygous	69	70	98.57	0.46	33.72	Gene: "ycbJ gene", CDS: "ycbJ CDS (protein kinase-like domain protein)"	ycbJ CDS (protein kinase-like domain protein):c.460G>A	ycbJ CDS (protein kinase-like domain protein):p.Val154Met
BAP1_deltaBioH-MatBC mapping	1459094	SNV	1	G	A		Homozygous	114	114	100	0.5	34.97	Gene: "ydcP gene", CDS: "ydcP CDS (putative peptidase)"	ydcP CDS (putative peptidase):c.1378G>A	ydcP CDS (putative peptidase):p.Gly460Ser
BAP1_deltaBioH-MatBC mapping	1534618	SNV	1	A	T		Homozygous	90	91	98.9	0.5	33.71	Gene: "ydeN gene", CDS: "ydeN CDS (putative Ser-type periplasmic non-aryl sulfatase)"	ydeN CDS (putative Ser-type periplasmic non-aryl sulfatase):c.261T>A	ydeN CDS (putative Ser-type periplasmic non-aryl sulfatase):p.Asn87Lys
BAP1_deltaBioH-MatBC mapping	1796339	SNV	1	G	A		Homozygous	126	128	98.44	0.48	34.18	Gene: "ydjG gene", CDS: "ydjG CDS (methylglyoxal reductase,_NADH-dependent)"	ydjG CDS (methylglyoxal reductase, NADH-dependent):c.883C>T	ydjG CDS (methylglyoxal reductase, NADH-dependent):p.Pro295Ser
BAP1_deltaBioH-MatBC mapping	2103164	SNV	1	A	G		Homozygous	81	81	100	0.49	33.96	Gene: "yehR gene", CDS: "yehR CDS (lipoprotein,_DUF1307 family)"	yehR CDS (lipoprotein, DUF1307 family):c.205A>G	yehR CDS (lipoprotein, DUF1307 family):p.Thr69Ala
BAP1_deltaBioH-MatBC mapping	2217303	SNV	1	A	G		Homozygous	110	110	100	0.46	34.94	Gene: "yfaS gene", CDS: "yfaS CDS (putative membrane protein)"	yfaS CDS (putative membrane protein):c.4334T>C	yfaS CDS (putative membrane protein):p.Val1445Ala
BAP1_deltaBioH-MatBC mapping	2217169	SNV	1	C	T		Homozygous	82	84	97.62	0.48	36.5	Gene: "yfaS gene", CDS: "yfaS CDS (putative membrane protein)"	yfaS CDS (putative membrane protein):c.4468G>A	yfaS CDS (putative membrane protein):p.Val1490Ile
BAP1_deltaBioH-MatBC mapping	2928999	SNV	1	T	C		Homozygous	113	113	100	0.47	33.9	Gene: "yggN gene", CDS: "yggN CDS (DUF2884 family putative periplasmic protein)"	yggN CDS (DUF2884 family putative periplasmic protein):c.266A>G	yggN CDS (DUF2884 family putative periplasmic protein):p.Glu89Gly
BAP1_deltaBioH-MatBC mapping	3401244	SNV	1	G	C		Homozygous	81	81	100	0.47	33.54	Gene: "yhgA gene", CDS: "yhgA CDS (transposase_31 family protein)"	yhgA CDS (transposase_31 family protein):c.844G>C	yhgA CDS (transposase_31 family protein):p.Val282Leu
BAP1_deltaBioH-MatBC mapping	3443174	SNV	1	C	T		Homozygous	112	112	100	0.5	34.46	Gene: "yhhW gene", CDS: "yhhW CDS (quercetinase activity in vitro)"	yhhW CDS (quercetinase activity in vitro):c.568G>A	yhhW CDS (quercetinase activity in vitro):p.Gly190Ser
BAP1_deltaBioH-MatBC mapping	3609524	SNV	1	G	A		Homozygous	97	100	97	0.49	34.15	Gene: "yiaO gene", CDS: "yiaO CDS (2,3-diketo-L-gulonate-binding periplasmic protein)"	yiaO CDS (2,3-diketo-L-gulonate-binding periplasmic protein):c.332G>A	yiaO CDS (2,3-diketo-L-gulonate-binding periplasmic protein):p.Arg111His
BAP1_deltaBioH-MatBC mapping	3968749	SNV	1	A	G		Homozygous	72	73	98.63	0.49	33.22	Gene: "yihL gene", CDS: "yihL CDS (putative DNA-binding transcriptional regulator)"	yihL CDS (putative DNA-binding transcriptional regulator):c.658A>G	yihL CDS (putative DNA-binding transcriptional regulator):p.Ile220Val
BAP1_deltaBioH-MatBC mapping	3969216	SNV	1	A	G		Homozygous	92	93	98.92	0.47	33.16	Gene: "yihM gene", CDS: "yihM CDS (putative sugar phosphate isomerase)"	yihM CDS (putative sugar phosphate isomerase):c.407A>G	yihM CDS (putative sugar phosphate isomerase):p.Tyr136Cys
BAP1_deltaBioH-MatBC mapping	4401561	SNV	1	C	T		Homozygous	103	104	99.04	0.5	32.97	Gene: "yjgR gene", CDS: "yjgR CDS (DUF853 family protein with NTPase fold)"	yjgR CDS (DUF853 family protein with NTPase fold):c.1042G>A	yjgR CDS (DUF853 family protein with NTPase fold):p.Asp348Asn
BAP1_deltaBioH-MatBC mapping	4475956	SNV	1	T	C		Homozygous	96	97	98.97	0.47	34.55	Gene: "yjiM gene", CDS: "yjiM CDS (putative 2-hydroxyglutaryl-CoA dehydratase)"	yjiM CDS (putative 2-hydroxyglutaryl-CoA dehydratase):c.121A>G	yjiM CDS (putative 2-hydroxyglutaryl-CoA dehydratase):p.Thr41Ala
BAP1_deltaBioH-MatBC mapping	3054258	SNV	1	A	G		Homozygous	103	104	99.04	0.48	33.94	Gene: "yqiI gene", CDS: "yqiI CDS (fimbrial protein)"	yqiI CDS (fimbrial protein):c.653A>G	yqiI CDS (fimbrial protein):p.Asp218Gly
BAP1_deltaBioH-MatBC mapping	4674	SNV	1	G	A		Homozygous	106	106	100	0.5	32.28	Gene: "thrC gene", CDS: "thrC CDS (L-threonine synthase)"	thrC CDS (L-threonine synthase):c.942G>A
BAP1_deltaBioH-MatBC mapping	13498	SNV	1	A	G		Homozygous	74	74	100	0.47	33.41	Gene: "dnaK gene", CDS: "dnaK CDS (chaperone Hsp70,_with co-chaperone DnaJ)"	dnaK CDS (chaperone Hsp70, with co-chaperone DnaJ):c.1338A>G
BAP1_deltaBioH-MatBC mapping	945334	SNV	1	A	T		Homozygous	73	73	100	0.47	31.88	Gene: "dmsA gene", CDS: "dmsA CDS (dimethyl sulfoxide reductase,_anaerobic,_subunit A)"	dmsA CDS (dimethyl sulfoxide reductase, anaerobic, subunit A):c.2412A>T
BAP1_deltaBioH-MatBC mapping	973180	SNV	1	T	C		Homozygous	80	80	100	0.5	35.1	Gene: "kdsB gene", CDS: "kdsB CDS (3-deoxy-manno-octulosonate cytidylyltransferase)"	kdsB CDS (3-deoxy-manno-octulosonate cytidylyltransferase):c.366T>C
BAP1_deltaBioH-MatBC mapping	1381147	SNV	1	A	G		Homozygous	104	104	100	0.49	34.71	Gene: "fnr gene"
BAP1_deltaBioH-MatBC mapping	1547520	SNV	1	A	G		Homozygous	82	82	100	0.48	35.72
BAP1_deltaBioH-MatBC mapping	1557183	SNV	1	A	G		Homozygous	104	104	100	0.48	32.69
BAP1_deltaBioH-MatBC mapping	1853962	SNV	1	T	C		Homozygous	101	101	100	0.45	33.6	Gene: "yebQ gene", CDS: "yebQ CDS (putative transporter)"	yebQ CDS (putative transporter):c.1089T>C
BAP1_deltaBioH-MatBC mapping	2245521	SNV	1	G	A		Homozygous	69	69	100	0.49	33.99	Gene: "rhmA gene", CDS: "rhmA CDS (2-keto-3-deoxy-L-rhamnonate aldolase)"	rhmA CDS (2-keto-3-deoxy-L-rhamnonate aldolase):c.372C>T
BAP1_deltaBioH-MatBC mapping	2500681	SNV	1	G	A		Homozygous	82	82	100	0.48	33.07	Gene: "hisS gene", CDS: "hisS CDS (histidyl tRNA synthetase)"	hisS CDS (histidyl tRNA synthetase):c.1248C>T
BAP1_deltaBioH-MatBC mapping	2633711	SNV	1	C	T		Homozygous	86	86	100	0.5	32.91	Gene: "yqaE gene", CDS: "yqaE CDS (cyaR sRNA-regulated protein)"	yqaE CDS (cyaR sRNA-regulated protein):c.51G>A
BAP1_deltaBioH-MatBC mapping	2839235	SNV	1	C	T		Homozygous	114	114	100	0.48	34.25	Gene: "yqeA gene", CDS: "yqeA CDS (putative amino acid kinase)"	yqeA CDS (putative amino acid kinase):c.40C>T
BAP1_deltaBioH-MatBC mapping	3018395	SNV	1	T	C		Homozygous	90	90	100	0.43	34.38	Gene: "yghB gene", CDS: "yghB CDS (general envelope maintenance protein; DedA family inner membrane protein; putative multidrug efflux transporter)"	yghB CDS (general envelope maintenance protein; DedA family inner membrane protein; putative multidrug efflux transporter):c.523T>C
BAP1_deltaBioH-MatBC mapping	3115589	SNV	1	C	T		Homozygous	80	80	100	0.49	33.78	Gene: "yhaH gene", CDS: "yhaH CDS (DUF805 family inner membrane protein)"	yhaH CDS (DUF805 family inner membrane protein):c.115C>T
BAP1_deltaBioH-MatBC mapping	3336191	SNV	1	G	A		Homozygous	110	110	100	0.49	33.29	Gene: "kefB gene", CDS: "kefB CDS (potassium:proton antiporter)"	kefB CDS (potassium:proton antiporter):c.891C>T
BAP1_deltaBioH-MatBC mapping	3815715	SNV	1	G	T		Homozygous	114	114	100	0.47	35.61
BAP1_deltaBioH-MatBC mapping	4489966	SNV	1	G	A		Homozygous	116	116	100	0.5	32.94	Gene: "hsdM gene", CDS: "hsdM CDS (DNA methyltransferase M)"	hsdM CDS (DNA methyltransferase M):c.1146C>T
BAP1_deltaBioH-MatBC mapping	2360922	SNV	1	T	C		Homozygous	116	117	99.15	0.49	32.14	Gene: "evgS gene", CDS: "evgS CDS (hybrid sensory histidine kinase in two-component regulatory system with EvgA)"	evgS CDS (hybrid sensory histidine kinase in two-component regulatory system with EvgA):c.1788T>C
BAP1_deltaBioH-MatBC mapping	3954434	SNV	1	A	G		Homozygous	115	116	99.14	0.5	34.8
BAP1_deltaBioH-MatBC mapping	168565	SNV	1	G	A		Homozygous	110	111	99.1	0.49	33.95	Gene: "mrcB gene", CDS: "mrcB CDS (fused glycosyl transferase and transpeptidase)"	mrcB CDS (fused glycosyl transferase and transpeptidase):c.984G>A
BAP1_deltaBioH-MatBC mapping	3504068	SNV	1	C	T		Homozygous	109	110	99.09	0.48	35.65
BAP1_deltaBioH-MatBC mapping	4258990	SNV	1	G	A		Homozygous	108	109	99.08	0.44	34.56	Gene: "dcuS gene"
BAP1_deltaBioH-MatBC mapping	1945126	SNV	1	G	A		Homozygous	105	106	99.06	0.5	33.98	Gene: "ECD_04329 gene", CDS: "ECD_04329 CDS (hypothetical protein)"	ECD_04329 CDS (hypothetical protein):c.186G>A
BAP1_deltaBioH-MatBC mapping	2985274	SNV	1	G	A		Homozygous	102	103	99.03	0.5	34.76
BAP1_deltaBioH-MatBC mapping	2828862	SNV	1	G	A		Homozygous	99	100	99	0.49	31.82	Gene: "xdhA gene", CDS: "xdhA CDS (xanthine dehydrogenase,_molybdenum binding subunit)"	xdhA CDS (xanthine dehydrogenase, molybdenum binding subunit):c.783G>A
BAP1_deltaBioH-MatBC mapping	3402999	SNV	1	C	A		Homozygous	94	95	98.95	0.48	33.79	Protein binding site: "lac operator"
BAP1_deltaBioH-MatBC mapping	2224630	SNV	1	T	C		Homozygous	84	85	98.82	0.48	35.17	Gene: "gyrA gene", CDS: "gyrA CDS (DNA gyrase (type II topoisomerase),_subunit A)"	gyrA CDS (DNA gyrase (type II topoisomerase), subunit A):c.2025A>G
BAP1_deltaBioH-MatBC mapping	4426944	SNV	1	C	T		Homozygous	82	83	98.8	0.45	31.24	Gene: "fecC gene", CDS: "fecC CDS (ferric citrate ABC transporter permease)", Misc. feature: "phage-like element KpLE2"	fecC CDS (ferric citrate ABC transporter permease):c.810G>A
BAP1_deltaBioH-MatBC mapping	3970764	SNV	1	C	T		Homozygous	74	75	98.67	0.49	34.96	Gene: "yihN gene", CDS: "yihN CDS (MFS transporter family protein)"	yihN CDS (MFS transporter family protein):c.873C>T
BAP1_deltaBioH-MatBC mapping	3401273	SNV	1	C	T		Homozygous	67	68	98.53	0.48	32.55	Gene: "yhgA gene", CDS: "yhgA CDS (transposase_31 family protein)"	yhgA CDS (transposase_31 family protein):c.873C>T
BAP1_deltaBioH-MatBC mapping	3401281	SNV	1	T	G		Homozygous	66	67	98.51	0.48	33.32
BAP1_deltaBioH-MatBC mapping	2276824	SNV	1	C	T		Homozygous	103	105	98.1	0.45	32.9	Gene: "nuoM gene", CDS: "nuoM CDS (NADH:ubiquinone oxidoreductase,_membrane subunit M)"	nuoM CDS (NADH:ubiquinone oxidoreductase, membrane subunit M):c.276G>A
BAP1_deltaBioH-MatBC mapping	2914658	SNV	1	C	T		Homozygous	98	100	98	0.5	33.55	Gene: "metK gene", CDS: "metK CDS (S-adenosylmethionine synthetase)"	metK CDS (S-adenosylmethionine synthetase):c.222C>T
BAP1_deltaBioH-MatBC mapping	2155262	Deletion	1	A	-		Homozygous	85	87	97.7	0.48	32.52
BAP1_deltaBioH-MatBC mapping	4239484	SNV	1	T	C		Homozygous	81	83	97.59	0.43	33.37	Gene: "proP gene", CDS: "proP CDS (proline/glycine betaine transporter)"	proP CDS (proline/glycine betaine transporter):c.957T>C
BAP1_deltaBioH-MatBC mapping	3558436	SNV	1	T	C		Homozygous	78	80	97.5	0.46	33.1
BAP1_deltaBioH-MatBC mapping	2868808	SNV	1	T	C		Homozygous	97	100	97	0.49	35.19
BAP1_deltaBioH-MatBC mapping	1218166	SNV	1	A	C		Homozygous	93	96	96.88	0.45	34.06
BAP1_deltaBioH-MatBC mapping	3021797	Deletion	1	C	-		Homozygous	92	95	96.84	0.47	30.86
BAP1_deltaBioH-MatBC mapping	1543450	SNV	1	A	G		Homozygous	87	90	96.67	0.46	34.09	Gene: "ECD_01464 gene"
BAP1_deltaBioH-MatBC mapping	268422	SNV	1	G	A		Homozygous	76	79	96.2	0.5	34.64	Gene: "paoD gene", CDS: "paoD CDS (moco insertion factor for PaoABC aldehyde oxidoreductase)"	paoD CDS (moco insertion factor for PaoABC aldehyde oxidoreductase):c.492C>T
BAP1_deltaBioH-MatBC mapping	3401295	Insertion	1	-	T		Homozygous	60	66	90.91	0.5	34.13

## Sheet: SK-7 colony 16
Mapping	Reference Position	Type	Length	Reference	Allele	Linkage	Zygosity	Count	Coverage	Frequency	Forward/reverse balance	Average quality	Overlapping annotations	Coding region change	Amino acid change
BAP1_deltaBioH-MatBC mapping	2042782	SNV	1	T	C		Homozygous	63	63	100	0.46	32.75	Gene: "alkA gene", CDS: "alkA CDS (3-methyl-adenine DNA glycosylase II)"	alkA CDS (3-methyl-adenine DNA glycosylase II):c.631A>G	alkA CDS (3-methyl-adenine DNA glycosylase II):p.Thr211Ala
BAP1_deltaBioH-MatBC mapping	3026483	SNV	1	T	C		Homozygous	80	80	100	0.49	33.66	Gene: "ftsP gene", CDS: "ftsP CDS (septal ring component that protects the divisome from stress; multicopy suppressor of ftsI(Ts))"	ftsP CDS (septal ring component that protects the divisome from stress; multicopy suppressor of ftsI(Ts)):c.497A>G	ftsP CDS (septal ring component that protects the divisome from stress; multicopy suppressor of ftsI(Ts)):p.Glu166Gly
BAP1_deltaBioH-MatBC mapping	2917039	SNV	1	T	C		Homozygous	74	74	100	0.49	34.28	Gene: "galP gene", CDS: "galP CDS (D-galactose transporter)"	galP CDS (D-galactose transporter):c.1025T>C	galP CDS (D-galactose transporter):p.Ile342Thr
BAP1_deltaBioH-MatBC mapping	4203180	SNV	1	T	A		Homozygous	63	64	98.44	0.48	36.24	Gene: "gltP gene", CDS: "gltP CDS (glutamate/aspartate:proton symporter)"	gltP CDS (glutamate/aspartate:proton symporter):c.341T>A	gltP CDS (glutamate/aspartate:proton symporter):p.Met114Lys
BAP1_deltaBioH-MatBC mapping	427365	SNV	1	A	C		Homozygous	68	69	98.55	0.47	35.18	Gene: "hupB gene", CDS: "hupB CDS (HU,_DNA-binding transcriptional regulator,_beta subunit)"	hupB CDS (HU, DNA-binding transcriptional regulator, beta subunit):c.8A>C	hupB CDS (HU, DNA-binding transcriptional regulator, beta subunit):p.Lys3Thr
BAP1_deltaBioH-MatBC mapping	1036489	SNV	1	C	T		Homozygous	79	81	97.53	0.48	33.61	Gene: "hyaB gene", CDS: "hyaB CDS (hydrogenase 1,_large subunit)"	hyaB CDS (hydrogenase 1, large subunit):c.1274C>T	hyaB CDS (hydrogenase 1, large subunit):p.Ala425Val
BAP1_deltaBioH-MatBC mapping	1021862	SNV	1	G	A		Homozygous	64	64	100	0.45	35	Gene: "ompA gene", CDS: "ompA CDS (outer membrane protein A (3a;II*;G;d))"	ompA CDS (outer membrane protein A (3a;II*;G;d)):c.154C>T	ompA CDS (outer membrane protein A (3a;II*;G;d)):p.His52Tyr
BAP1_deltaBioH-MatBC mapping	4518118	SNV	1	C	T		Homozygous	48	48	100	0.48	34.75	Gene: "opgB gene", CDS: "opgB CDS (OPG periplasmic biosynthetic phosphoglycerol transferases I (membrane-bound) and II (soluble))"	opgB CDS (OPG periplasmic biosynthetic phosphoglycerol transferases I (membrane-bound) and II (soluble)):c.646G>A	opgB CDS (OPG periplasmic biosynthetic phosphoglycerol transferases I (membrane-bound) and II (soluble)):p.Val216Met
BAP1_deltaBioH-MatBC mapping	899223	SNV	1	T	C		Homozygous	57	57	100	0.47	33.81	Gene: "potI gene", CDS: "potI CDS (putrescine ABC transporter permease)"	potI CDS (putrescine ABC transporter permease):c.563T>C	potI CDS (putrescine ABC transporter permease):p.Ile188Thr
BAP1_deltaBioH-MatBC mapping	1526466	SNV	1	A	G		Homozygous	70	74	94.59	0.47	32.84	Gene: "pqqL gene", CDS: "pqqL CDS (putative periplasmic M16 family zinc metalloendopeptidase)"	pqqL CDS (putative periplasmic M16 family zinc metalloendopeptidase):c.1091T>C	pqqL CDS (putative periplasmic M16 family zinc metalloendopeptidase):p.Leu364Ser
BAP1_deltaBioH-MatBC mapping	2609164	SNV	1	A	G		Homozygous	60	60	100	0.48	34.47	Gene: "rimM gene", CDS: "rimM CDS (ribosome maturation factor)"	rimM CDS (ribosome maturation factor):c.142T>C	rimM CDS (ribosome maturation factor):p.Phe48Leu
BAP1_deltaBioH-MatBC mapping	2504837	SNV	1	T	C		Homozygous	65	65	100	0.48	34.92	Gene: "rlmN gene", CDS: "rlmN CDS (dual specificity 23S rRNA m(2)A2503,_tRNA m(2)A37 methyltransferase,_SAM-dependent)"	rlmN CDS (dual specificity 23S rRNA m(2)A2503, tRNA m(2)A37 methyltransferase, SAM-dependent):c.800A>G	rlmN CDS (dual specificity 23S rRNA m(2)A2503, tRNA m(2)A37 methyltransferase, SAM-dependent):p.Lys267Arg
BAP1_deltaBioH-MatBC mapping	1071334	SNV	1	A	G		Homozygous	74	74	100	0.46	33.31	Gene: "rutF gene", CDS: "rutF CDS (flavin:NADH reductase)"	rutF CDS (flavin:NADH reductase):c.176T>C	rutF CDS (flavin:NADH reductase):p.Val59Ala
BAP1_deltaBioH-MatBC mapping	998968	SNV	1	C	A		Homozygous	65	65	100	0.49	32.51	Gene: "ssuE gene", CDS: "ssuE CDS (NAD(P)H-dependent FMN reductase)"	ssuE CDS (NAD(P)H-dependent FMN reductase):c.507G>T	ssuE CDS (NAD(P)H-dependent FMN reductase):p.Trp169Cys
BAP1_deltaBioH-MatBC mapping	731876	SNV	1	G	A		Homozygous	80	80	100	0.49	34.76	Gene: "tolA gene", CDS: "tolA CDS (membrane anchored protein in TolA-TolQ-TolR complex)"	tolA CDS (membrane anchored protein in TolA-TolQ-TolR complex):c.1G>A	tolA CDS (membrane anchored protein in TolA-TolQ-TolR complex):p.Val1Met
BAP1_deltaBioH-MatBC mapping	974174	SNV	1	G	A		Homozygous	78	78	100	0.49	35.05	Gene: "ycbJ gene", CDS: "ycbJ CDS (protein kinase-like domain protein)"	ycbJ CDS (protein kinase-like domain protein):c.460G>A	ycbJ CDS (protein kinase-like domain protein):p.Val154Met
BAP1_deltaBioH-MatBC mapping	1459094	SNV	1	G	A		Homozygous	83	83	100	0.46	33.58	Gene: "ydcP gene", CDS: "ydcP CDS (putative peptidase)"	ydcP CDS (putative peptidase):c.1378G>A	ydcP CDS (putative peptidase):p.Gly460Ser
BAP1_deltaBioH-MatBC mapping	2928999	SNV	1	T	C		Homozygous	82	82	100	0.49	33.46	Gene: "yggN gene", CDS: "yggN CDS (DUF2884 family putative periplasmic protein)"	yggN CDS (DUF2884 family putative periplasmic protein):c.266A>G	yggN CDS (DUF2884 family putative periplasmic protein):p.Glu89Gly
BAP1_deltaBioH-MatBC mapping	3401244	SNV	1	G	C		Homozygous	61	61	100	0.46	34.57	Gene: "yhgA gene", CDS: "yhgA CDS (transposase_31 family protein)"	yhgA CDS (transposase_31 family protein):c.844G>C	yhgA CDS (transposase_31 family protein):p.Val282Leu
BAP1_deltaBioH-MatBC mapping	3968749	SNV	1	A	G		Homozygous	72	72	100	0.49	33.92	Gene: "yihL gene", CDS: "yihL CDS (putative DNA-binding transcriptional regulator)"	yihL CDS (putative DNA-binding transcriptional regulator):c.658A>G	yihL CDS (putative DNA-binding transcriptional regulator):p.Ile220Val
BAP1_deltaBioH-MatBC mapping	4475956	SNV	1	T	C		Homozygous	82	83	98.8	0.49	35.3	Gene: "yjiM gene", CDS: "yjiM CDS (putative 2-hydroxyglutaryl-CoA dehydratase)"	yjiM CDS (putative 2-hydroxyglutaryl-CoA dehydratase):c.121A>G	yjiM CDS (putative 2-hydroxyglutaryl-CoA dehydratase):p.Thr41Ala
BAP1_deltaBioH-MatBC mapping	3402999	SNV	1	C	A		Homozygous	66	69	95.65	0.48	33.12	Protein binding site: "lac operator"
BAP1_deltaBioH-MatBC mapping	1218166	SNV	1	A	C		Homozygous	76	78	97.44	0.47	33.28
BAP1_deltaBioH-MatBC mapping	4426944	SNV	1	C	T		Homozygous	86	88	97.73	0.48	33.53	Gene: "fecC gene", CDS: "fecC CDS (ferric citrate ABC transporter permease)", Misc. feature: "phage-like element KpLE2"	fecC CDS (ferric citrate ABC transporter permease):c.810G>A
BAP1_deltaBioH-MatBC mapping	3021797	Deletion	1	C	-		Homozygous	74	75	98.67	0.49	30.66
BAP1_deltaBioH-MatBC mapping	3018395	SNV	1	T	C		Homozygous	86	87	98.85	0.48	35.41	Gene: "yghB gene", CDS: "yghB CDS (general envelope maintenance protein; DedA family inner membrane protein; putative multidrug efflux transporter)"	yghB CDS (general envelope maintenance protein; DedA family inner membrane protein; putative multidrug efflux transporter):c.523T>C
BAP1_deltaBioH-MatBC mapping	4674	SNV	1	G	A		Homozygous	65	65	100	0.49	35.97	Gene: "thrC gene", CDS: "thrC CDS (L-threonine synthase)"	thrC CDS (L-threonine synthase):c.942G>A
BAP1_deltaBioH-MatBC mapping	945334	SNV	1	A	T		Homozygous	70	70	100	0.47	32.09	Gene: "dmsA gene", CDS: "dmsA CDS (dimethyl sulfoxide reductase,_anaerobic,_subunit A)"	dmsA CDS (dimethyl sulfoxide reductase, anaerobic, subunit A):c.2412A>T
BAP1_deltaBioH-MatBC mapping	1381147	SNV	1	A	G		Homozygous	68	68	100	0.47	35.56	Gene: "fnr gene"
BAP1_deltaBioH-MatBC mapping	1853962	SNV	1	T	C		Homozygous	65	65	100	0.43	34.94	Gene: "yebQ gene", CDS: "yebQ CDS (putative transporter)"	yebQ CDS (putative transporter):c.1089T>C
BAP1_deltaBioH-MatBC mapping	1945126	SNV	1	G	A		Homozygous	83	83	100	0.48	33.67	Gene: "ECD_04329 gene", CDS: "ECD_04329 CDS (hypothetical protein)"	ECD_04329 CDS (hypothetical protein):c.186G>A
BAP1_deltaBioH-MatBC mapping	2224630	SNV	1	T	C		Homozygous	84	84	100	0.48	35.33	Gene: "gyrA gene", CDS: "gyrA CDS (DNA gyrase (type II topoisomerase),_subunit A)"	gyrA CDS (DNA gyrase (type II topoisomerase), subunit A):c.2025A>G
BAP1_deltaBioH-MatBC mapping	2985274	SNV	1	G	A		Homozygous	75	75	100	0.48	34.56
BAP1_deltaBioH-MatBC mapping	3401273	SNV	1	C	T		Homozygous	64	64	100	0.44	32.28	Gene: "yhgA gene", CDS: "yhgA CDS (transposase_31 family protein)"	yhgA CDS (transposase_31 family protein):c.873C>T
BAP1_deltaBioH-MatBC mapping	3401281	SNV	1	T	G		Homozygous	65	65	100	0.46	34.91
BAP1_deltaBioH-MatBC mapping	3401295	Insertion	1	-	T		Homozygous	62	62	100	0.47	34.32
BAP1_deltaBioH-MatBC mapping	3558436	SNV	1	T	C		Homozygous	92	92	100	0.49	33.63

## Sheet: SK-3 colony 18
Mapping	Reference Position	Type	Length	Reference	Allele	Linkage	Zygosity	Count	Coverage	Frequency	Forward/reverse balance	Average quality	Overlapping annotations	Coding region change	Amino acid change
BAP1_deltaBioH-MatBC mapping	2042782	SNV	1	T	C		Homozygous	103	104	99.04	0.47	34.76	Gene: "alkA gene", CDS: "alkA CDS (3-methyl-adenine DNA glycosylase II)"	alkA CDS (3-methyl-adenine DNA glycosylase II):c.631A>G	alkA CDS (3-methyl-adenine DNA glycosylase II):p.Thr211Ala
BAP1_deltaBioH-MatBC mapping	511717	SNV	1	C	T		Homozygous	91	91	100	0.49	31.77	Gene: "allD gene", CDS: "allD CDS (ureidoglycolate dehydrogenase)"	allD CDS (ureidoglycolate dehydrogenase):c.665G>A	allD CDS (ureidoglycolate dehydrogenase):p.Gly222Glu
BAP1_deltaBioH-MatBC mapping	4344710	SNV	1	G	A		Homozygous	99	102	97.06	0.46	33.61	Gene: "cycA gene", CDS: "cycA CDS (D-alanine/D-serine/glycine transporter)"	cycA CDS (D-alanine/D-serine/glycine transporter):c.536G>A	cycA CDS (D-alanine/D-serine/glycine transporter):p.Gly179Asp
BAP1_deltaBioH-MatBC mapping	1510874	SNV	1	C	T		Homozygous	81	81	100	0.48	32.84	Gene: "ddpD gene", CDS: "ddpD CDS (D,D-dipeptide ABC transporter ATPase)"	ddpD CDS (D,D-dipeptide ABC transporter ATPase):c.485G>A	ddpD CDS (D,D-dipeptide ABC transporter ATPase):p.Arg162His
BAP1_deltaBioH-MatBC mapping	2946540	SNV	1	G	A		Homozygous	90	91	98.9	0.46	33.67	Gene: "ECD_02817 gene", CDS: "ECD_02817 CDS (KpsU protein)"	ECD_02817 CDS (KpsU protein):c.55G>A	ECD_02817 CDS (KpsU protein):p.Gly19Ser
BAP1_deltaBioH-MatBC mapping	3914142	Deletion	1	C	-		Homozygous	94	99	94.95	0.48	32.71	Gene: "ECD_03713 gene", CDS: "ECD_03713 CDS (hypothetical protein)"	ECD_03713 CDS (hypothetical protein):c.134delG	ECD_03713 CDS (hypothetical protein):p.Gly45fs
BAP1_deltaBioH-MatBC mapping	3921580	SNV	1	C	T		Homozygous	83	84	98.81	0.49	33.69	Gene: "ECD_03721 gene", CDS: "ECD_03721 CDS (hypothetical protein)"	ECD_03721 CDS (hypothetical protein):c.956G>A	ECD_03721 CDS (hypothetical protein):p.Arg319His
BAP1_deltaBioH-MatBC mapping	278233	Insertion	1	-	C		Homozygous	88	100	88	0.47	34.12	Gene: "ecpC gene", CDS: "ecpC CDS (ECP production outer membrane protein)"	ecpC CDS (ECP production outer membrane protein):c.1285_1286insG	ecpC CDS (ECP production outer membrane protein):p.Ala429fs
BAP1_deltaBioH-MatBC mapping	2343705	SNV	1	C	T		Homozygous	123	126	97.62	0.5	33.38	Gene: "fadI gene", CDS: "fadI CDS (beta-ketoacyl-CoA thiolase,_anaerobic,_subunit)"	fadI CDS (beta-ketoacyl-CoA thiolase, anaerobic, subunit):c.963G>A	fadI CDS (beta-ketoacyl-CoA thiolase, anaerobic, subunit):p.Trp321*
BAP1_deltaBioH-MatBC mapping	1623671	SNV	1	G	A		Homozygous	101	101	100	0.5	32.8	Gene: "folM gene", CDS: "folM CDS (dihydromonapterin reductase,_NADPH-dependent; dihydrofolate reductase isozyme)"	folM CDS (dihydromonapterin reductase, NADPH-dependent; dihydrofolate reductase isozyme):c.626G>A	folM CDS (dihydromonapterin reductase, NADPH-dependent; dihydrofolate reductase isozyme):p.Gly209Asp
BAP1_deltaBioH-MatBC mapping	3026483	SNV	1	T	C		Homozygous	85	86	98.84	0.47	35	Gene: "ftsP gene", CDS: "ftsP CDS (septal ring component that protects the divisome from stress; multicopy suppressor of ftsI(Ts))"	ftsP CDS (septal ring component that protects the divisome from stress; multicopy suppressor of ftsI(Ts)):c.497A>G	ftsP CDS (septal ring component that protects the divisome from stress; multicopy suppressor of ftsI(Ts)):p.Glu166Gly
BAP1_deltaBioH-MatBC mapping	2917039	SNV	1	T	C		Homozygous	100	100	100	0.5	35.22	Gene: "galP gene", CDS: "galP CDS (D-galactose transporter)"	galP CDS (D-galactose transporter):c.1025T>C	galP CDS (D-galactose transporter):p.Ile342Thr
BAP1_deltaBioH-MatBC mapping	4203180	SNV	1	T	A		Homozygous	75	76	98.68	0.47	34.05	Gene: "gltP gene", CDS: "gltP CDS (glutamate/aspartate:proton symporter)"	gltP CDS (glutamate/aspartate:proton symporter):c.341T>A	gltP CDS (glutamate/aspartate:proton symporter):p.Met114Lys
BAP1_deltaBioH-MatBC mapping	427365	SNV	1	A	C		Homozygous	99	100	99	0.49	34.92	Gene: "hupB gene", CDS: "hupB CDS (HU,_DNA-binding transcriptional regulator,_beta subunit)"	hupB CDS (HU, DNA-binding transcriptional regulator, beta subunit):c.8A>C	hupB CDS (HU, DNA-binding transcriptional regulator, beta subunit):p.Lys3Thr
BAP1_deltaBioH-MatBC mapping	1036489	SNV	1	C	T		Homozygous	101	101	100	0.49	33.26	Gene: "hyaB gene", CDS: "hyaB CDS (hydrogenase 1,_large subunit)"	hyaB CDS (hydrogenase 1, large subunit):c.1274C>T	hyaB CDS (hydrogenase 1, large subunit):p.Ala425Val
BAP1_deltaBioH-MatBC mapping	2739658	SNV	1	G	A		Homozygous	90	91	98.9	0.47	34.66	Gene: "mazG gene", CDS: "mazG CDS (nucleoside triphosphate pyrophosphohydrolase)"	mazG CDS (nucleoside triphosphate pyrophosphohydrolase):c.490C>T	mazG CDS (nucleoside triphosphate pyrophosphohydrolase):p.Pro164Ser
BAP1_deltaBioH-MatBC mapping	4485777	Deletion	1	T	-		Homozygous	111	113	98.23	0.49	33.96	Gene: "mcrB gene", CDS: "mcrB CDS (5-methylcytosine-specific restriction enzyme McrBC,_subunit McrB)"	mcrB CDS (5-methylcytosine-specific restriction enzyme McrBC, subunit McrB):c.818delA	mcrB CDS (5-methylcytosine-specific restriction enzyme McrBC, subunit McrB):p.Lys273fs
BAP1_deltaBioH-MatBC mapping	3258398	SNV	1	T	C		Homozygous	116	117	99.15	0.49	34.79	Gene: "mreB gene", CDS: "mreB CDS (cell wall structural complex MreBCD,_actin-like component MreB)"	mreB CDS (cell wall structural complex MreBCD, actin-like component MreB):c.719A>G	mreB CDS (cell wall structural complex MreBCD, actin-like component MreB):p.Asn240Ser
BAP1_deltaBioH-MatBC mapping	1021862	SNV	1	G	A		Homozygous	75	75	100	0.47	33.57	Gene: "ompA gene", CDS: "ompA CDS (outer membrane protein A (3a;II*;G;d))"	ompA CDS (outer membrane protein A (3a;II*;G;d)):c.154C>T	ompA CDS (outer membrane protein A (3a;II*;G;d)):p.His52Tyr
BAP1_deltaBioH-MatBC mapping	4518118	SNV	1	C	T		Homozygous	104	104	100	0.5	34.37	Gene: "opgB gene", CDS: "opgB CDS (OPG periplasmic biosynthetic phosphoglycerol transferases I (membrane-bound) and II (soluble))"	opgB CDS (OPG periplasmic biosynthetic phosphoglycerol transferases I (membrane-bound) and II (soluble)):c.646G>A	opgB CDS (OPG periplasmic biosynthetic phosphoglycerol transferases I (membrane-bound) and II (soluble)):p.Val216Met
BAP1_deltaBioH-MatBC mapping	899223	SNV	1	T	C		Homozygous	52	53	98.11	0.46	34.92	Gene: "potI gene", CDS: "potI CDS (putrescine ABC transporter permease)"	potI CDS (putrescine ABC transporter permease):c.563T>C	potI CDS (putrescine ABC transporter permease):p.Ile188Thr
BAP1_deltaBioH-MatBC mapping	1526466	SNV	1	A	G		Homozygous	86	90	95.56	0.48	33.73	Gene: "pqqL gene", CDS: "pqqL CDS (putative periplasmic M16 family zinc metalloendopeptidase)"	pqqL CDS (putative periplasmic M16 family zinc metalloendopeptidase):c.1091T>C	pqqL CDS (putative periplasmic M16 family zinc metalloendopeptidase):p.Leu364Ser
BAP1_deltaBioH-MatBC mapping	2659431	SNV	1	A	T		Homozygous	87	88	98.86	0.47	33.99	Gene: "recX gene", CDS: "recX CDS (regulatory protein for RecA)"	recX CDS (regulatory protein for RecA):c.48T>A	recX CDS (regulatory protein for RecA):p.Asp16Glu
BAP1_deltaBioH-MatBC mapping	2609164	SNV	1	A	G		Homozygous	119	119	100	0.47	33.77	Gene: "rimM gene", CDS: "rimM CDS (ribosome maturation factor)"	rimM CDS (ribosome maturation factor):c.142T>C	rimM CDS (ribosome maturation factor):p.Phe48Leu
BAP1_deltaBioH-MatBC mapping	2504837	SNV	1	T	C		Homozygous	99	100	99	0.49	34.16	Gene: "rlmN gene", CDS: "rlmN CDS (dual specificity 23S rRNA m(2)A2503,_tRNA m(2)A37 methyltransferase,_SAM-dependent)"	rlmN CDS (dual specificity 23S rRNA m(2)A2503, tRNA m(2)A37 methyltransferase, SAM-dependent):c.800A>G	rlmN CDS (dual specificity 23S rRNA m(2)A2503, tRNA m(2)A37 methyltransferase, SAM-dependent):p.Lys267Arg
BAP1_deltaBioH-MatBC mapping	1071334	SNV	1	A	G		Homozygous	83	88	94.32	0.48	32.35	Gene: "rutF gene", CDS: "rutF CDS (flavin:NADH reductase)"	rutF CDS (flavin:NADH reductase):c.176T>C	rutF CDS (flavin:NADH reductase):p.Val59Ala
BAP1_deltaBioH-MatBC mapping	998968	SNV	1	C	A		Homozygous	78	78	100	0.49	33.74	Gene: "ssuE gene", CDS: "ssuE CDS (NAD(P)H-dependent FMN reductase)"	ssuE CDS (NAD(P)H-dependent FMN reductase):c.507G>T	ssuE CDS (NAD(P)H-dependent FMN reductase):p.Trp169Cys
BAP1_deltaBioH-MatBC mapping	2635057	Insertion	1	-	T		Homozygous	99	112	88.39	0.49	34.88	Gene: "stpA gene", CDS: "stpA CDS (DNA binding protein,_nucleoid-associated)"	stpA CDS (DNA binding protein, nucleoid-associated):c.172_173insA	stpA CDS (DNA binding protein, nucleoid-associated):p.Ile58fs
BAP1_deltaBioH-MatBC mapping	2440458	SNV	1	A	G		Homozygous	85	86	98.84	0.47	33.2	Gene: "talA gene", CDS: "talA CDS (transaldolase A)"	talA CDS (transaldolase A):c.431A>G	talA CDS (transaldolase A):p.Glu144Gly
BAP1_deltaBioH-MatBC mapping	731876	SNV	1	G	A		Homozygous	108	109	99.08	0.5	33.65	Gene: "tolA gene", CDS: "tolA CDS (membrane anchored protein in TolA-TolQ-TolR complex)"	tolA CDS (membrane anchored protein in TolA-TolQ-TolR complex):c.1G>A	tolA CDS (membrane anchored protein in TolA-TolQ-TolR complex):p.Val1Met
BAP1_deltaBioH-MatBC mapping	237789	Deletion	1	G	-		Homozygous	109	112	97.32	0.5	32.89	Gene: "yafS gene", CDS: "yafS CDS (putative S-adenosyl-L-methionine-dependent methyltransferase)"	yafS CDS (putative S-adenosyl-L-methionine-dependent methyltransferase):c.47delG	yafS CDS (putative S-adenosyl-L-methionine-dependent methyltransferase):p.Trp16fs
BAP1_deltaBioH-MatBC mapping	974174	SNV	1	G	A		Homozygous	94	95	98.95	0.46	34.09	Gene: "ycbJ gene", CDS: "ycbJ CDS (protein kinase-like domain protein)"	ycbJ CDS (protein kinase-like domain protein):c.460G>A	ycbJ CDS (protein kinase-like domain protein):p.Val154Met
BAP1_deltaBioH-MatBC mapping	1355826	SNV	1	A	G		Homozygous	82	82	100	0.46	35	Gene: "ycjN gene", CDS: "ycjN CDS (putative ABC sugar transporter periplasmic binding protein)"	ycjN CDS (putative ABC sugar transporter periplasmic binding protein):c.679A>G	ycjN CDS (putative ABC sugar transporter periplasmic binding protein):p.Met227Val
BAP1_deltaBioH-MatBC mapping	1459094	SNV	1	G	A		Homozygous	114	115	99.13	0.48	33.99	Gene: "ydcP gene", CDS: "ydcP CDS (putative peptidase)"	ydcP CDS (putative peptidase):c.1378G>A	ydcP CDS (putative peptidase):p.Gly460Ser
BAP1_deltaBioH-MatBC mapping	2928999	SNV	1	T	C		Homozygous	84	84	100	0.46	33.85	Gene: "yggN gene", CDS: "yggN CDS (DUF2884 family putative periplasmic protein)"	yggN CDS (DUF2884 family putative periplasmic protein):c.266A>G	yggN CDS (DUF2884 family putative periplasmic protein):p.Glu89Gly
BAP1_deltaBioH-MatBC mapping	3401244	SNV	1	G	C		Homozygous	56	57	98.25	0.43	31.93	Gene: "yhgA gene", CDS: "yhgA CDS (transposase_31 family protein)"	yhgA CDS (transposase_31 family protein):c.844G>C	yhgA CDS (transposase_31 family protein):p.Val282Leu
BAP1_deltaBioH-MatBC mapping	3620280	SNV	1	A	G		Homozygous	98	98	100	0.49	34.08	Gene: "yiaU gene", CDS: "yiaU CDS (putative DNA-binding transcriptional regulator)"	yiaU CDS (putative DNA-binding transcriptional regulator):c.953A>G	yiaU CDS (putative DNA-binding transcriptional regulator):p.Gln318Arg
BAP1_deltaBioH-MatBC mapping	3968749	SNV	1	A	G		Homozygous	90	91	98.9	0.48	32.47	Gene: "yihL gene", CDS: "yihL CDS (putative DNA-binding transcriptional regulator)"	yihL CDS (putative DNA-binding transcriptional regulator):c.658A>G	yihL CDS (putative DNA-binding transcriptional regulator):p.Ile220Val
BAP1_deltaBioH-MatBC mapping	3982981	SNV	1	A	G		Homozygous	91	91	100	0.49	35.16	Gene: "yihW gene", CDS: "yihW CDS (putative transcriptional regulator for sulfoquinovose utilization)"	yihW CDS (putative transcriptional regulator for sulfoquinovose utilization):c.779A>G	yihW CDS (putative transcriptional regulator for sulfoquinovose utilization):p.Asp260Gly
BAP1_deltaBioH-MatBC mapping	4417390	Insertion	1	-	A		Homozygous	69	77	89.61	0.46	34.42	Gene: "yjhC gene", CDS: "yjhC CDS (GFO/IDH/MOCA family putative oxidoreductase NAD(P)-dependent)", Misc. feature: "phage-like element KpLE2"	yjhC CDS (GFO/IDH/MOCA family putative oxidoreductase NAD(P)-dependent):c.899_900insA	yjhC CDS (GFO/IDH/MOCA family putative oxidoreductase NAD(P)-dependent):p.Gly300fs
BAP1_deltaBioH-MatBC mapping	4475956	SNV	1	T	C		Homozygous	98	98	100	0.49	34.89	Gene: "yjiM gene", CDS: "yjiM CDS (putative 2-hydroxyglutaryl-CoA dehydratase)"	yjiM CDS (putative 2-hydroxyglutaryl-CoA dehydratase):c.121A>G	yjiM CDS (putative 2-hydroxyglutaryl-CoA dehydratase):p.Thr41Ala
BAP1_deltaBioH-MatBC mapping	194696	SNV	1	A	G		Homozygous	104	104	100	0.49	34.05
BAP1_deltaBioH-MatBC mapping	554937	SNV	1	A	G		Homozygous	103	103	100	0.5	34.39	Gene: "cusA gene", CDS: "cusA CDS (copper/silver efflux system,_membrane component)"	cusA CDS (copper/silver efflux system, membrane component):c.669A>G
BAP1_deltaBioH-MatBC mapping	605294	SNV	1	C	T		Homozygous	90	90	100	0.44	34.03	Gene: "citF gene", CDS: "citF CDS (citrate lyase,_citrate-ACP transferase (alpha) subunit)"	citF CDS (citrate lyase, citrate-ACP transferase (alpha) subunit):c.981G>A
BAP1_deltaBioH-MatBC mapping	971453	SNV	1	T	C		Homozygous	118	118	100	0.49	34.11	Gene: "ycaQ gene", CDS: "ycaQ CDS (DUF1006 family protein with C-terminal wHTH domain)"	ycaQ CDS (DUF1006 family protein with C-terminal wHTH domain):c.102T>C
BAP1_deltaBioH-MatBC mapping	1309082	SNV	1	A	G		Homozygous	106	106	100	0.49	34.29	Gene: "yciQ gene"
BAP1_deltaBioH-MatBC mapping	1314069	SNV	1	C	T		Homozygous	90	90	100	0.48	35.28
BAP1_deltaBioH-MatBC mapping	2051065	SNV	1	G	A		Homozygous	98	98	100	0.47	35.04	Gene: "mdtB gene", CDS: "mdtB CDS (multidrug efflux system,_subunit B)"	mdtB CDS (multidrug efflux system, subunit B):c.9G>A
BAP1_deltaBioH-MatBC mapping	2696767	SNV	1	G	A		Homozygous	84	84	100	0.45	33.51	Gene: "pphB gene", CDS: "pphB CDS (serine/threonine-specific protein phosphatase 2)"	pphB CDS (serine/threonine-specific protein phosphatase 2):c.168G>A
BAP1_deltaBioH-MatBC mapping	3018395	SNV	1	T	C		Homozygous	74	74	100	0.49	33.34	Gene: "yghB gene", CDS: "yghB CDS (general envelope maintenance protein; DedA family inner membrane protein; putative multidrug efflux transporter)"	yghB CDS (general envelope maintenance protein; DedA family inner membrane protein; putative multidrug efflux transporter):c.523T>C
BAP1_deltaBioH-MatBC mapping	3401281	SNV	1	T	G		Homozygous	61	61	100	0.41	33.23
BAP1_deltaBioH-MatBC mapping	3558436	SNV	1	T	C		Homozygous	94	94	100	0.48	34.15
BAP1_deltaBioH-MatBC mapping	3059000	SNV	1	C	T		Homozygous	122	123	99.19	0.5	34.31	Gene: "hldE gene", CDS: "hldE CDS (heptose 7-phosphate kinase and heptose 1-phosphate adenyltransferase)"	hldE CDS (heptose 7-phosphate kinase and heptose 1-phosphate adenyltransferase):c.726G>A
BAP1_deltaBioH-MatBC mapping	1853962	SNV	1	T	C		Homozygous	111	112	99.11	0.45	33.57	Gene: "yebQ gene", CDS: "yebQ CDS (putative transporter)"	yebQ CDS (putative transporter):c.1089T>C
BAP1_deltaBioH-MatBC mapping	1218166	SNV	1	A	C		Homozygous	104	105	99.05	0.48	34.2
BAP1_deltaBioH-MatBC mapping	2985274	SNV	1	G	A		Homozygous	103	104	99.04	0.5	34.41
BAP1_deltaBioH-MatBC mapping	1381147	SNV	1	A	G		Homozygous	102	103	99.03	0.5	35.09	Gene: "fnr gene"
BAP1_deltaBioH-MatBC mapping	1703043	SNV	1	G	A		Homozygous	99	100	99	0.49	34.31	Gene: "sufD gene", CDS: "sufD CDS (component of SufBCD Fe-S cluster assembly scaffold)"	sufD CDS (component of SufBCD Fe-S cluster assembly scaffold):c.891C>T
BAP1_deltaBioH-MatBC mapping	2943091	SNV	1	G	A		Homozygous	99	100	99	0.47	33.71	Gene: "ECD_02814 gene", CDS: "ECD_02814 CDS (hypothetical protein)"	ECD_02814 CDS (hypothetical protein):c.555G>A
BAP1_deltaBioH-MatBC mapping	4426944	SNV	1	C	T		Homozygous	88	89	98.88	0.49	31.99	Gene: "fecC gene", CDS: "fecC CDS (ferric citrate ABC transporter permease)", Misc. feature: "phage-like element KpLE2"	fecC CDS (ferric citrate ABC transporter permease):c.810G>A
BAP1_deltaBioH-MatBC mapping	3402999	SNV	1	C	A		Homozygous	76	77	98.7	0.45	33.53	Protein binding site: "lac operator"
BAP1_deltaBioH-MatBC mapping	1263709	SNV	1	C	T		Homozygous	69	70	98.57	0.48	34.16	Gene: "narK gene", CDS: "narK CDS (nitrate/nitrite transporter)"	narK CDS (nitrate/nitrite transporter):c.732C>T
BAP1_deltaBioH-MatBC mapping	3401273	SNV	1	C	T		Homozygous	57	58	98.28	0.42	32.47	Gene: "yhgA gene", CDS: "yhgA CDS (transposase_31 family protein)"	yhgA CDS (transposase_31 family protein):c.873C>T
BAP1_deltaBioH-MatBC mapping	463852	SNV	1	C	T		Homozygous	99	101	98.02	0.49	34.79
BAP1_deltaBioH-MatBC mapping	945334	SNV	1	A	T		Homozygous	91	93	97.85	0.49	33.36	Gene: "dmsA gene", CDS: "dmsA CDS (dimethyl sulfoxide reductase,_anaerobic,_subunit A)"	dmsA CDS (dimethyl sulfoxide reductase, anaerobic, subunit A):c.2412A>T
BAP1_deltaBioH-MatBC mapping	1945126	SNV	1	G	A		Homozygous	86	88	97.73	0.47	34.4	Gene: "ECD_04329 gene", CDS: "ECD_04329 CDS (hypothetical protein)"	ECD_04329 CDS (hypothetical protein):c.186G>A
BAP1_deltaBioH-MatBC mapping	225647	SNV	1	A	G		Homozygous	113	116	97.41	0.49	34.61
BAP1_deltaBioH-MatBC mapping	2224630	SNV	1	T	C		Homozygous	75	77	97.4	0.48	35.61	Gene: "gyrA gene", CDS: "gyrA CDS (DNA gyrase (type II topoisomerase),_subunit A)"	gyrA CDS (DNA gyrase (type II topoisomerase), subunit A):c.2025A>G
BAP1_deltaBioH-MatBC mapping	4674	SNV	1	G	A		Homozygous	94	97	96.91	0.48	34.36	Gene: "thrC gene", CDS: "thrC CDS (L-threonine synthase)"	thrC CDS (L-threonine synthase):c.942G>A
BAP1_deltaBioH-MatBC mapping	1828773	SNV	1	C	T		Homozygous	62	64	96.88	0.5	35.15	Gene: "yeaX gene", CDS: "yeaX CDS (putative YeaWX dioxygenase beta subunit,_reductase component)"	yeaX CDS (putative YeaWX dioxygenase beta subunit, reductase component):c.330C>T
BAP1_deltaBioH-MatBC mapping	3401295	Insertion	1	-	T		Homozygous	59	61	96.72	0.44	33.61
BAP1_deltaBioH-MatBC mapping	3021797	Deletion	1	C	-		Homozygous	70	73	95.89	0.43	31.49
BAP1_deltaBioH-MatBC mapping	4067526	Insertion	1	-	A		Homozygous	88	93	94.62	0.49	34.25
BAP1_deltaBioH-MatBC mapping	3753803	Insertion	1	-	A		Homozygous	94	103	91.26	0.45	33.62	Gene: "yidP gene"
